# Supplementary material
Source: publisher figshare collection journal article supplement (https://acs.figshare.com/ndownloader/files/9158737)
Supplement: Supplementary file 1 [file 9158737]

data_NIH20
_audit_creation_date              2016-10-20
_audit_creation_method
;
Olex2 1.2-beta
(compiled 2016.09.09 svn.r3337 for OlexSys, GUI svn.r5227)
;
_publ_contact_author_address      ?
_publ_contact_author_email        ?
_publ_contact_author_id_orcid     ?
_publ_contact_author_name         ''
_publ_contact_author_phone        ?
_publ_section_references
;
Dolomanov, O.V., Bourhis, L.J., Gildea, R.J, Howard, J.A.K. & Puschmann, H.
 (2009), J. Appl. Cryst. 42, 339-341.

Sheldrick, G.M. (2015). Acta Cryst. A71, 3-8.

Sheldrick, G.M. (2015). Acta Cryst. C71, 3-8.
;
_chemical_name_common             ?
_chemical_name_systematic         ?
_chemical_formula_moiety          'C12 H15 Cl N O2, Cl, H2 O'
_chemical_formula_sum             'C12 H17 Cl2 N O3'
_chemical_formula_weight          294.16
_chemical_absolute_configuration  ad
_chemical_melting_point           ?
loop_
  _atom_type_symbol
  _atom_type_description
  _atom_type_scat_dispersion_real
  _atom_type_scat_dispersion_imag
  _atom_type_scat_source
 'C' 'C' 0.0033 0.0016 'International Tables Vol C Tables 4.2.6.8 and 6.1.1.4'
 'H' 'H' 0.0000 0.0000 'International Tables Vol C Tables 4.2.6.8 and 6.1.1.4'
 'Cl' 'Cl' 0.1484 0.1585 'International Tables Vol C Tables 4.2.6.8 and 6.1.1.4'
 'N' 'N' 0.0061 0.0033 'International Tables Vol C Tables 4.2.6.8 and 6.1.1.4'
 'O' 'O' 0.0106 0.0060 'International Tables Vol C Tables 4.2.6.8 and 6.1.1.4'

_shelx_space_group_comment
;
The symmetry employed for this shelxl refinement is uniquely defined
by the following loop, which should always be used as a source of
symmetry information in preference to the above space-group names.
They are only intended as comments.
;
_space_group_crystal_system       'monoclinic'
_space_group_IT_number            4
_space_group_name_H-M_alt         'P 1 21 1'
_space_group_name_Hall            'P 2yb'
loop_
  _space_group_symop_operation_xyz
 'x, y, z'
 '-x, y+1/2, -z'

_cell_length_a                    7.4051(6)
_cell_length_b                    8.6895(8)
_cell_length_c                    11.7644(11)
_cell_angle_alpha                 90
_cell_angle_beta                  107.588(2)
_cell_angle_gamma                 90
_cell_volume                      721.61(11)
_cell_formula_units_Z             2
_cell_measurement_reflns_used     6203
_cell_measurement_temperature     100.0
_cell_measurement_theta_max       26.233
_cell_measurement_theta_min       2.885
_shelx_estimated_absorpt_T_max    0.977
_shelx_estimated_absorpt_T_min    0.887
_exptl_absorpt_coefficient_mu     0.449
_exptl_absorpt_correction_T_max   0.2602
_exptl_absorpt_correction_T_min   0.2275
_exptl_absorpt_correction_type    multi-scan
_exptl_absorpt_process_details
;
SADABS-2016/2 (Bruker,2016/2) was used for absorption correction.
wR2(int) was 0.1513 before and 0.0598 after correction.
The Ratio of minimum to maximum transmission is 0.8743.
The \l/2 correction factor is Not present.
;
_exptl_absorpt_special_details    ?
_exptl_crystal_colour             Colorless
_exptl_crystal_colour_primary     Colorless
_exptl_crystal_density_diffrn     1.354
_exptl_crystal_density_meas       ?
_exptl_crystal_density_method     ?
_exptl_crystal_description        Plank
_exptl_crystal_F_000              308
_exptl_crystal_size_max           0.273
_exptl_crystal_size_mid           0.106
_exptl_crystal_size_min           0.052
_exptl_transmission_factor_max    ?
_exptl_transmission_factor_min    ?
_diffrn_reflns_av_R_equivalents   0.0462
_diffrn_reflns_av_unetI/netI      0.0379
_diffrn_reflns_Laue_measured_fraction_full 1.000
_diffrn_reflns_Laue_measured_fraction_max 0.997
_diffrn_reflns_limit_h_max        9
_diffrn_reflns_limit_h_min        -6
_diffrn_reflns_limit_k_max        10
_diffrn_reflns_limit_k_min        -10
_diffrn_reflns_limit_l_max        14
_diffrn_reflns_limit_l_min        -14
_diffrn_reflns_number             12479
_diffrn_reflns_point_group_measured_fraction_full 1.000
_diffrn_reflns_point_group_measured_fraction_max 0.992
_diffrn_reflns_theta_full         25.000
_diffrn_reflns_theta_max          26.410
_diffrn_reflns_theta_min          1.816
_diffrn_ambient_temperature       100.0
_diffrn_detector                  'Bruker APEX-II CCD'
_diffrn_detector_area_resol_mean  8.258
_diffrn_detector_type             'CCD Area Detector'
_diffrn_measured_fraction_theta_full 1.000
_diffrn_measured_fraction_theta_max 0.997
_diffrn_measurement_device        'Kappa Four-Circle Diffractometer'
_diffrn_measurement_device_type   'Bruker APEX II Ultra'
_diffrn_measurement_method        '\w and \f scans'
_diffrn_radiation_monochromator   'Double Bounce Multilayer Mirrors'
_diffrn_radiation_probe           X-ray
_diffrn_radiation_type            MoK\a
_diffrn_radiation_wavelength      0.71073
_diffrn_source                    'Micro Focus Rotating Anode'
_diffrn_source_type               'Bruker TXS'
_diffrn_special_details           ?
_diffrn_standards_number          0
_reflns_Friedel_coverage          0.862
_reflns_Friedel_fraction_full     1.000
_reflns_Friedel_fraction_max      0.986
_reflns_number_gt                 2841
_reflns_number_total              2945
_reflns_special_details
;
 Reflections were merged by SHELXL according to the crystal
 class for the calculation of statistics and refinement.
 
 _reflns_Friedel_fraction is defined as the number of unique
 Friedel pairs measured divided by the number that would be
 possible theoretically, ignoring centric projections and
 systematic absences.
;
_reflns_threshold_expression      'I > 2\s(I)'
_computing_cell_refinement        'SAINT v8.37A (Bruker, 2016)'
_computing_data_collection        'APEX3 v2016.1-0 (Bruker, 2016)'
_computing_data_reduction         'SAINT v8.37A (Bruker, 2016)'
_computing_molecular_graphics     'Olex2 (Dolomanov et al., 2009)'
_computing_publication_material   'Olex2 (Dolomanov et al., 2009)'
_computing_structure_refinement   'ShelXL (Sheldrick, 2015)'
_computing_structure_solution     'ShelXT (Sheldrick, 2015)'
_refine_diff_density_max          0.218
_refine_diff_density_min          -0.184
_refine_diff_density_rms          0.040
_refine_ls_abs_structure_details
;
 Flack x determined using 1262 quotients [(I+)-(I-)]/[(I+)+(I-)]
 (Parsons, Flack and Wagner, Acta Cryst. B69 (2013) 249-259).
;
_refine_ls_abs_structure_Flack    -0.01(3)
_refine_ls_extinction_coef        .
_refine_ls_extinction_method      none
_refine_ls_goodness_of_fit_ref    1.049
_refine_ls_hydrogen_treatment     mixed
_refine_ls_matrix_type            full
_refine_ls_number_parameters      187
_refine_ls_number_reflns          2945
_refine_ls_number_restraints      7
_refine_ls_R_factor_all           0.0270
_refine_ls_R_factor_gt            0.0252
_refine_ls_restrained_S_all       1.052
_refine_ls_shift/su_max           0.000
_refine_ls_shift/su_mean          0.000
_refine_ls_structure_factor_coef  Fsqd
_refine_ls_weighting_details
'w=1/[\s^2^(Fo^2^)+(0.0246P)^2^+0.1104P] where P=(Fo^2^+2Fc^2^)/3'
_refine_ls_weighting_scheme       calc
_refine_ls_wR_factor_gt           0.0587
_refine_ls_wR_factor_ref          0.0599
_refine_special_details           ?
_olex2_refinement_description
;
1. Fixed Uiso
 At 1.2 times of:
  All C(H) groups, All C(H,H) groups
2. Restrained distances
 O2-H2 = N1-H1B = N1-H1A = N1-H1C = O1S-H1SA = O1S-H1SB
 0.95 with sigma of 0.02
3.a Ternary CH refined with riding coordinates:
 C11(H11)
3.b Secondary CH2 refined with riding coordinates:
 C9(H9A,H9B), C10(H10A,H10B), C12(H12A,H12B)
3.c Aromatic/amide H refined with riding coordinates:
 C2(H2A), C3(H3), C4(H4), C5(H5)
;
_atom_sites_solution_hydrogens    mixed
_atom_sites_solution_primary      dual
_atom_sites_solution_secondary    difmap
loop_
  _atom_site_label
  _atom_site_type_symbol
  _atom_site_fract_x
  _atom_site_fract_y
  _atom_site_fract_z
  _atom_site_U_iso_or_equiv
  _atom_site_adp_type
  _atom_site_occupancy
  _atom_site_site_symmetry_order
  _atom_site_calc_flag
  _atom_site_refinement_flags_posn
  _atom_site_refinement_flags_adp
  _atom_site_refinement_flags_occupancy
  _atom_site_disorder_assembly
  _atom_site_disorder_group
 Cl1 Cl 0.89188(8) 0.69297(8) 0.67481(5) 0.02311(16) Uani 1 1 d . . . . .
 O1 O 0.9032(2) 0.6263(2) 0.94623(15) 0.0185(4) Uani 1 1 d . . . . .
 O2 O 0.3213(2) 0.3114(2) 0.89979(15) 0.0174(4) Uani 1 1 d D . . . .
 H2 H 0.288(4) 0.218(3) 0.869(3) 0.034(9) Uiso 1 1 d D . . . .
 N1 N 0.6060(3) 0.7964(2) 0.84827(18) 0.0139(4) Uani 1 1 d D . . . .
 H1A H 0.491(3) 0.847(3) 0.817(2) 0.013(7) Uiso 1 1 d D . . . .
 H1B H 0.633(4) 0.800(3) 0.9312(19) 0.021(7) Uiso 1 1 d D . . . .
 H1C H 0.713(3) 0.842(3) 0.837(2) 0.019(7) Uiso 1 1 d D . . . .
 C1 C 0.6552(3) 0.6460(3) 0.6054(2) 0.0171(5) Uani 1 1 d . . . . .
 C2 C 0.5995(4) 0.6346(3) 0.4825(2) 0.0237(6) Uani 1 1 d . . . . .
 H2A H 0.689106 0.647528 0.440043 0.028 Uiso 1 1 calc R . . . .
 C3 C 0.4110(4) 0.6041(3) 0.4219(2) 0.0258(6) Uani 1 1 d . . . . .
 H3 H 0.371169 0.594686 0.337478 0.031 Uiso 1 1 calc R . . . .
 C4 C 0.2819(4) 0.5876(3) 0.4840(2) 0.0255(6) Uani 1 1 d . . . . .
 H4 H 0.152204 0.569640 0.442387 0.031 Uiso 1 1 calc R . . . .
 C5 C 0.3407(3) 0.5972(3) 0.6071(2) 0.0195(6) Uani 1 1 d . . . . .
 H5 H 0.250041 0.584764 0.648842 0.023 Uiso 1 1 calc R . . . .
 C6 C 0.5297(3) 0.6246(3) 0.6718(2) 0.0143(5) Uani 1 1 d . . . . .
 C7 C 0.5916(3) 0.6323(3) 0.8081(2) 0.0132(5) Uani 1 1 d . . . . .
 C8 C 0.7843(3) 0.5560(3) 0.8703(2) 0.0140(5) Uani 1 1 d . . . . .
 C9 C 0.7942(3) 0.3882(3) 0.8458(2) 0.0170(5) Uani 1 1 d . . . . .
 H9A H 0.923425 0.348552 0.884891 0.020 Uiso 1 1 calc R . . . .
 H9B H 0.762168 0.369709 0.758975 0.020 Uiso 1 1 calc R . . . .
 C10 C 0.6492(3) 0.3071(3) 0.8968(2) 0.0173(5) Uani 1 1 d . . . . .
 H10A H 0.645710 0.195874 0.878203 0.021 Uiso 1 1 calc R . . . .
 H10B H 0.689315 0.318716 0.984647 0.021 Uiso 1 1 calc R . . . .
 C11 C 0.4515(3) 0.3756(3) 0.8441(2) 0.0147(5) Uani 1 1 d . . . . .
 H11 H 0.405526 0.354088 0.756540 0.018 Uiso 1 1 calc R . . . .
 C12 C 0.4545(3) 0.5488(3) 0.8645(2) 0.0136(5) Uani 1 1 d . . . . .
 H12A H 0.493892 0.569651 0.951324 0.016 Uiso 1 1 calc R . . . .
 H12B H 0.325055 0.590420 0.829662 0.016 Uiso 1 1 calc R . . . .
 Cl2 Cl 0.24903(8) 0.00178(7) 0.76720(5) 0.01823(15) Uani 1 1 d . . . . .
 O1S O 0.8793(2) 1.0005(2) 0.83838(15) 0.0183(4) Uani 1 1 d D . . . .
 H1SA H 0.932(4) 1.037(4) 0.911(2) 0.032(9) Uiso 1 1 d D . . . .
 H1SB H 0.975(4) 0.985(4) 0.807(3) 0.039(9) Uiso 1 1 d D . . . .

loop_
  _atom_site_aniso_label
  _atom_site_aniso_U_11
  _atom_site_aniso_U_22
  _atom_site_aniso_U_33
  _atom_site_aniso_U_23
  _atom_site_aniso_U_13
  _atom_site_aniso_U_12
 Cl1 0.0173(3) 0.0347(4) 0.0196(3) -0.0036(3) 0.0089(2) -0.0048(3)
 O1 0.0180(9) 0.0189(9) 0.0160(9) 0.0009(7) 0.0013(7) 0.0007(7)
 O2 0.0206(9) 0.0160(9) 0.0176(9) -0.0013(8) 0.0089(7) -0.0045(8)
 N1 0.0152(11) 0.0134(11) 0.0127(10) -0.0011(9) 0.0036(9) -0.0002(9)
 C1 0.0159(12) 0.0171(13) 0.0176(12) -0.0018(10) 0.0038(10) -0.0003(10)
 C2 0.0317(16) 0.0253(14) 0.0162(12) -0.0021(11) 0.0105(11) -0.0029(13)
 C3 0.0361(16) 0.0273(16) 0.0113(12) -0.0008(11) 0.0029(11) -0.0029(13)
 C4 0.0233(15) 0.0282(16) 0.0195(13) -0.0009(12) -0.0019(11) -0.0016(13)
 C5 0.0168(13) 0.0239(16) 0.0170(12) 0.0015(11) 0.0037(10) -0.0007(11)
 C6 0.0175(12) 0.0126(12) 0.0123(11) 0.0004(10) 0.0036(9) 0.0028(10)
 C7 0.0145(12) 0.0112(12) 0.0133(11) -0.0018(10) 0.0035(9) 0.0000(10)
 C8 0.0140(12) 0.0184(13) 0.0111(11) 0.0029(10) 0.0059(9) 0.0013(10)
 C9 0.0170(13) 0.0164(13) 0.0177(12) -0.0002(10) 0.0051(10) 0.0031(11)
 C10 0.0201(13) 0.0134(13) 0.0193(12) 0.0017(10) 0.0072(10) 0.0014(11)
 C11 0.0174(12) 0.0169(13) 0.0114(11) -0.0006(10) 0.0065(9) -0.0015(11)
 C12 0.0146(12) 0.0160(13) 0.0108(11) 0.0005(9) 0.0047(9) -0.0002(10)
 Cl2 0.0157(3) 0.0190(3) 0.0208(3) -0.0009(3) 0.0067(2) 0.0007(3)
 O1S 0.0155(9) 0.0209(9) 0.0182(9) -0.0033(9) 0.0045(7) -0.0025(9)

_geom_special_details
;
 All esds (except the esd in the dihedral angle between two l.s. planes)
 are estimated using the full covariance matrix.  The cell esds are taken
 into account individually in the estimation of esds in distances, angles
 and torsion angles; correlations between esds in cell parameters are only
 used when they are defined by crystal symmetry.  An approximate (isotropic)
 treatment of cell esds is used for estimating esds involving l.s. planes.
;
loop_
  _geom_bond_atom_site_label_1
  _geom_bond_atom_site_label_2
  _geom_bond_distance
  _geom_bond_site_symmetry_2
  _geom_bond_publ_flag
 Cl1 C1 1.744(3) . ?
 O1 C8 1.213(3) . ?
 O2 H2 0.89(2) . ?
 O2 C11 1.432(3) . ?
 N1 H1A 0.93(2) . ?
 N1 H1B 0.94(2) . ?
 N1 H1C 0.94(2) . ?
 N1 C7 1.496(3) . ?
 C1 C2 1.382(3) . ?
 C1 C6 1.395(3) . ?
 C2 H2A 0.9500 . ?
 C2 C3 1.387(4) . ?
 C3 H3 0.9500 . ?
 C3 C4 1.376(4) . ?
 C4 H4 0.9500 . ?
 C4 C5 1.383(4) . ?
 C5 H5 0.9500 . ?
 C5 C6 1.397(3) . ?
 C6 C7 1.530(3) . ?
 C7 C8 1.542(3) . ?
 C7 C12 1.550(3) . ?
 C8 C9 1.492(4) . ?
 C9 H9A 0.9900 . ?
 C9 H9B 0.9900 . ?
 C9 C10 1.549(3) . ?
 C10 H10A 0.9900 . ?
 C10 H10B 0.9900 . ?
 C10 C11 1.527(3) . ?
 C11 H11 1.0000 . ?
 C11 C12 1.523(4) . ?
 C12 H12A 0.9900 . ?
 C12 H12B 0.9900 . ?
 O1S H1SA 0.88(2) . ?
 O1S H1SB 0.91(2) . ?

loop_
  _geom_angle_atom_site_label_1
  _geom_angle_atom_site_label_2
  _geom_angle_atom_site_label_3
  _geom_angle
  _geom_angle_site_symmetry_1
  _geom_angle_site_symmetry_3
  _geom_angle_publ_flag
 C11 O2 H2 108(2) . . ?
 H1A N1 H1B 107(2) . . ?
 H1A N1 H1C 117(2) . . ?
 H1B N1 H1C 102(2) . . ?
 C7 N1 H1A 110.8(17) . . ?
 C7 N1 H1B 109.3(18) . . ?
 C7 N1 H1C 110.1(17) . . ?
 C2 C1 Cl1 116.5(2) . . ?
 C2 C1 C6 122.5(2) . . ?
 C6 C1 Cl1 120.96(18) . . ?
 C1 C2 H2A 120.4 . . ?
 C1 C2 C3 119.1(3) . . ?
 C3 C2 H2A 120.4 . . ?
 C2 C3 H3 120.0 . . ?
 C4 C3 C2 120.0(2) . . ?
 C4 C3 H3 120.0 . . ?
 C3 C4 H4 120.0 . . ?
 C3 C4 C5 120.1(2) . . ?
 C5 C4 H4 120.0 . . ?
 C4 C5 H5 119.1 . . ?
 C4 C5 C6 121.8(2) . . ?
 C6 C5 H5 119.1 . . ?
 C1 C6 C5 116.4(2) . . ?
 C1 C6 C7 122.8(2) . . ?
 C5 C6 C7 120.8(2) . . ?
 N1 C7 C6 110.03(19) . . ?
 N1 C7 C8 106.99(19) . . ?
 N1 C7 C12 107.70(19) . . ?
 C6 C7 C8 114.83(19) . . ?
 C6 C7 C12 113.6(2) . . ?
 C8 C7 C12 103.14(19) . . ?
 O1 C8 C7 119.7(2) . . ?
 O1 C8 C9 124.5(2) . . ?
 C9 C8 C7 114.9(2) . . ?
 C8 C9 H9A 110.4 . . ?
 C8 C9 H9B 110.4 . . ?
 C8 C9 C10 106.81(19) . . ?
 H9A C9 H9B 108.6 . . ?
 C10 C9 H9A 110.4 . . ?
 C10 C9 H9B 110.4 . . ?
 C9 C10 H10A 109.5 . . ?
 C9 C10 H10B 109.5 . . ?
 H10A C10 H10B 108.0 . . ?
 C11 C10 C9 110.9(2) . . ?
 C11 C10 H10A 109.5 . . ?
 C11 C10 H10B 109.5 . . ?
 O2 C11 C10 110.94(19) . . ?
 O2 C11 H11 109.4 . . ?
 O2 C11 C12 107.00(19) . . ?
 C10 C11 H11 109.4 . . ?
 C12 C11 C10 110.7(2) . . ?
 C12 C11 H11 109.4 . . ?
 C7 C12 H12A 109.2 . . ?
 C7 C12 H12B 109.2 . . ?
 C11 C12 C7 112.01(19) . . ?
 C11 C12 H12A 109.2 . . ?
 C11 C12 H12B 109.2 . . ?
 H12A C12 H12B 107.9 . . ?
 H1SA O1S H1SB 106(3) . . ?

loop_
  _geom_hbond_atom_site_label_D
  _geom_hbond_atom_site_label_H
  _geom_hbond_atom_site_label_A
  _geom_hbond_distance_DH
  _geom_hbond_distance_HA
  _geom_hbond_distance_DA
  _geom_hbond_angle_DHA
  _geom_hbond_site_symmetry_A
 O2 H2 Cl2 0.89(2) 2.20(2) 3.0747(19) 167(3) .
 N1 H1A Cl2 0.93(2) 2.18(2) 3.092(2) 169(2) 1_565
 N1 H1B O2 0.94(2) 1.92(2) 2.851(3) 177(3) 2_657
 N1 H1C O1S 0.94(2) 1.84(2) 2.720(3) 156(3) .
 O1S H1SA O1 0.88(2) 1.92(2) 2.783(2) 166(3) 2_757
 O1S H1SB Cl2 0.91(2) 2.22(2) 3.0959(18) 163(3) 1_665

_shelx_res_file
;
TITL NIH20 in P2(1)
 nih20.res created by SHELXL-2016/5 at 15:56:11 on 20-Oct-2016
REM SHELXT solution in P2(1)
REM R1 0.069, Rweak 0.029, Alpha 0.001, Orientation as input
REM Flack x = 0.004 ( 0.026 ) from Parsons' quotients
REM Formula found by SHELXT: C12 O4 Cl2
CELL 0.71073 7.4051 8.6895 11.7644 90 107.588 90
ZERR 2 0.0006 0.0008 0.0011 0 0.002 0
LATT -1
SYMM -X,0.5+Y,-Z
SFAC C H Cl N O
UNIT 24 34 4 2 6
EQIV $1 1-X,0.5+Y,2-Z
EQIV $2 2-X,0.5+Y,2-Z
EQIV $3 +X,1+Y,+Z
EQIV $4 1+X,1+Y,+Z
DFIX 0.95 O2 H2 N1 H1b N1 H1a N1 H1c O1S H1Sa O1S H1Sb

L.S. 10 0 89
PLAN  28
SIZE 0.273 0.106 0.052
TEMP -173.15
HTAB N1 O2_$1
HTAB N1 O1S
HTAB O1S O1_$2
HTAB O2 Cl2
HTAB N1 Cl2_$3
HTAB O1S Cl2_$4
BOND $H
list 4
ACTA 50
fmap 2
REM <olex2.extras>
REM <HklSrc "%.\\NIH20.hkl">
REM </olex2.extras>

WGHT    0.024600    0.110400
FVAR       1.17354
CL1   3    0.891878    0.692968    0.674808    11.00000    0.01725    0.03472 =
         0.01958   -0.00360    0.00891   -0.00475
O1    5    0.903247    0.626319    0.946234    11.00000    0.01800    0.01890 =
         0.01597    0.00090    0.00128    0.00075
O2    5    0.321283    0.311406    0.899792    11.00000    0.02057    0.01597 =
         0.01765   -0.00129    0.00894   -0.00446
H2    2    0.288461    0.218300    0.869190    11.00000    0.03434
N1    4    0.605983    0.796365    0.848268    11.00000    0.01518    0.01339 =
         0.01269   -0.00113    0.00360   -0.00017
H1A   2    0.491361    0.846755    0.816704    11.00000    0.01342
H1B   2    0.633413    0.799538    0.931242    11.00000    0.02114
H1C   2    0.713448    0.842474    0.836573    11.00000    0.01898
C1    1    0.655174    0.645952    0.605419    11.00000    0.01589    0.01705 =
         0.01759   -0.00185    0.00384   -0.00028
C2    1    0.599483    0.634617    0.482477    11.00000    0.03166    0.02532 =
         0.01621   -0.00213    0.01055   -0.00287
AFIX  43
H2A   2    0.689106    0.647528    0.440043    11.00000   -1.20000
AFIX   0
C3    1    0.411029    0.604146    0.421871    11.00000    0.03609    0.02727 =
         0.01133   -0.00081    0.00287   -0.00291
AFIX  43
H3    2    0.371169    0.594686    0.337478    11.00000   -1.20000
AFIX   0
C4    1    0.281894    0.587632    0.484048    11.00000    0.02328    0.02818 =
         0.01952   -0.00087   -0.00188   -0.00160
AFIX  43
H4    2    0.152204    0.569640    0.442387    11.00000   -1.20000
AFIX   0
C5    1    0.340707    0.597201    0.607122    11.00000    0.01678    0.02389 =
         0.01702    0.00154    0.00372   -0.00066
AFIX  43
H5    2    0.250041    0.584764    0.648842    11.00000   -1.20000
AFIX   0
C6    1    0.529659    0.624638    0.671811    11.00000    0.01752    0.01256 =
         0.01227    0.00039    0.00358    0.00281
C7    1    0.591586    0.632284    0.808123    11.00000    0.01447    0.01123 =
         0.01328   -0.00175    0.00349    0.00003
C8    1    0.784253    0.556031    0.870346    11.00000    0.01397    0.01842 =
         0.01110    0.00286    0.00588    0.00130
C9    1    0.794193    0.388243    0.845843    11.00000    0.01699    0.01638 =
         0.01768   -0.00019    0.00515    0.00310
AFIX  23
H9A   2    0.923425    0.348552    0.884891    11.00000   -1.20000
H9B   2    0.762168    0.369709    0.758975    11.00000   -1.20000
AFIX   0
C10   1    0.649158    0.307139    0.896835    11.00000    0.02005    0.01340 =
         0.01930    0.00170    0.00717    0.00144
AFIX  23
H10A  2    0.645710    0.195874    0.878203    11.00000   -1.20000
H10B  2    0.689315    0.318716    0.984647    11.00000   -1.20000
AFIX   0
C11   1    0.451488    0.375615    0.844099    11.00000    0.01742    0.01688 =
         0.01139   -0.00059    0.00654   -0.00150
AFIX  13
H11   2    0.405526    0.354088    0.756540    11.00000   -1.20000
AFIX   0
C12   1    0.454503    0.548836    0.864544    11.00000    0.01455    0.01596 =
         0.01081    0.00047    0.00469   -0.00023
AFIX  23
H12A  2    0.493892    0.569651    0.951324    11.00000   -1.20000
H12B  2    0.325055    0.590420    0.829662    11.00000   -1.20000
AFIX   0

CL2   3    0.249026    0.001781    0.767201    11.00000    0.01569    0.01896 =
         0.02079   -0.00093    0.00665    0.00074
O1S   5    0.879252    1.000478    0.838378    11.00000    0.01552    0.02085 =
         0.01823   -0.00333    0.00450   -0.00252
H1SA  2    0.932362    1.036792    0.910740    11.00000    0.03178
H1SB  2    0.975337    0.985104    0.806649    11.00000    0.03935
HKLF 4


REM  NIH20 in P2(1)
REM R1 =  0.0252 for    2841 Fo > 4sig(Fo)  and  0.0270 for all    2945 data
REM    187 parameters refined using      7 restraints

END

WGHT      0.0246      0.1104

REM Highest difference peak  0.218,  deepest hole -0.184,  1-sigma level  0.040
Q1    1   0.5725  0.6287  0.7370  11.00000  0.05    0.22
Q2    1   0.6928  0.5991  0.8361  11.00000  0.05    0.21
Q3    1   0.2622 -0.1024  0.8378  11.00000  0.05    0.18
Q4    1   0.7591  0.6748  0.6347  11.00000  0.05    0.17
Q5    1   0.4444  0.4583  0.8545  11.00000  0.05    0.16
Q6    1   0.7097  0.3463  0.8635  11.00000  0.05    0.15
Q7    1   0.8038  0.4655  0.8624  11.00000  0.05    0.15
Q8    1  -0.0274  0.8358  0.3823  11.00000  0.05    0.15
Q9    1   0.4366  0.6342  0.6425  11.00000  0.05    0.15
Q10   1   0.9871  0.6516  0.6202  11.00000  0.05    0.14
Q11   1   0.0757  0.4460  0.7238  11.00000  0.05    0.14
Q12   1   0.9405  0.6421  0.7576  11.00000  0.05    0.14
Q13   1   0.9036  0.5846  0.6694  11.00000  0.05    0.13
Q14   1   0.5345  0.5769  0.8287  11.00000  0.05    0.13
Q15   1   0.0508  0.5468  0.6524  11.00000  0.05    0.13
Q16   1   0.7517  0.9906  0.7852  11.00000  0.05    0.13
Q17   1   1.0827  0.8359  0.7791  11.00000  0.05    0.13
Q18   1   0.7766  0.3803  0.7993  11.00000  0.05    0.13
Q19   1   0.6136  0.6921  0.5403  11.00000  0.05    0.13
Q20   1   0.5946  0.6649  0.6367  11.00000  0.05    0.13
Q21   1   0.0860  0.3404  0.6834  11.00000  0.05    0.13
Q22   1   0.2138 -0.1188  0.7390  11.00000  0.05    0.13
Q23   1   0.1482  0.0953  0.7217  11.00000  0.05    0.13
Q24   1   0.4926  0.6783  0.4599  11.00000  0.05    0.13
Q25   1   1.0295  0.6071  0.9947  11.00000  0.05    0.12
Q26   1   0.9146  0.7837  0.7399  11.00000  0.05    0.12
Q27   1   0.9071  0.7168  0.9446  11.00000  0.05    0.12
Q28   1   0.4437  0.5639  0.6396  11.00000  0.05    0.12
;
_shelx_res_checksum               28224
_shelx_hkl_file
;
   1   0   0 2924.61  153.68
   1   0   0 3001.40  153.98
   1   0   0 2904.01  154.58
   1   0   0 2949.41  153.58
  -1   0   0 2479.95  153.38
  -1   0   0 2994.70  153.58
   2   0   0  855.31   45.80
   2   0   0  833.92   46.10
  -2   0   0  871.11   45.70
   2   0   0  891.81   46.90
   2   0   0  802.72   48.00
   3   0   0   16.90    2.10
   3   0   0    8.50    1.10
   3   0   0   10.90    3.70
  -3   0   0    7.40    1.00
   3   0   0    5.20    2.20
  -3   0   0   12.60    1.70
  -4   0   0  753.12   40.30
   4   0   0  744.03   41.20
   4   0   0  801.72   45.50
   4   0   0  736.33   40.40
   4   0   0  727.63   43.30
   4   0   0  749.53   48.10
  -4   0   0  765.72   40.70
   5   0   0  361.66   29.40
   5   0   0  381.66   26.90
   5   0   0  422.06   25.20
   5   0   0  376.66   21.10
   5   0   0  393.96   20.90
   6   0   0  808.92   53.39
   6   0   0  757.42   48.10
   6   0   0  743.33   45.90
   7   0   0   34.30   11.60
   7   0   0   18.20    5.50
   7   0   0   27.00    7.50
   8   0   0  220.08   16.60
   8   0   0  253.17   29.30
   8   0   0  207.08   19.20
   0  -1   0   -0.10    1.40
   0  -1   0    0.60    0.80
   0  -1   0   -0.40    0.60
   0  -1   0   -0.30    0.90
   0  -1   0   -0.20    1.00
   0   1   0   -0.50    0.40
   0   1   0    3.30    1.50
   0   1   0    1.10    1.10
   0   1   0    0.90    0.80
   1  -1   0 3153.08  166.48
   1  -1   0 3035.30  166.78
  -1  -1   0 2941.11  167.48
   1  -1   0 3053.29  166.08
  -1  -1   0 3098.89  166.38
  -1  -1   0 3386.56  166.98
   1   1   0 3035.60  166.48
  -1   1   0 3370.66  166.78
   1   1   0 3034.10  167.58
   1   1   0 3069.69  166.48
   1   1   0 3045.80  166.88
  -1   1   0 3088.09  166.08
   2  -1   0  713.73   41.20
   2  -1   0  697.83   37.50
   2  -1   0  705.83   38.30
  -2  -1   0  661.83   39.20
  -2  -1   0  717.73   39.70
  -2  -1   0  778.32   39.20
   2  -1   0  711.63   37.90
   2   1   0  672.23   41.60
   2   1   0  746.03   39.70
   2   1   0  658.63   39.00
   2   1   0  673.83   38.50
  -2   1   0  692.93   37.40
   2   1   0  659.13   39.20
   3  -1   0 3213.78  180.68
  -3  -1   0 3482.95  177.48
   3  -1   0 3089.39  176.68
  -3  -1   0 3685.83  177.78
  -3  -1   0 3196.68  177.78
   3   1   0 3476.55  177.28
   3   1   0 3169.28  177.78
   3   1   0 3425.06  177.88
   3   1   0 3127.69  181.68
   3   1   0 3113.69  177.98
   4  -1   0   41.70    7.30
  -4  -1   0   44.40    4.70
   4  -1   0   40.50    5.20
   4  -1   0   46.50    4.90
   4   1   0   54.89   10.00
   4   1   0   47.30    6.40
   4   1   0   45.20    6.20
   4   1   0   47.80    5.50
   4   1   0   49.70    4.50
   5  -1   0  345.57   20.70
  -5  -1   0  340.47   20.50
   5  -1   0  325.87   21.60
  -5  -1   0  332.57   19.30
   5  -1   0  307.67   24.80
   5   1   0  347.07   22.90
   5   1   0  326.17   19.40
   5   1   0  359.66   28.40
   5   1   0  330.17   22.70
   5   1   0  331.37   20.70
   6  -1   0  386.86   31.40
   6  -1   0  341.97   24.50
   6  -1   0  385.36   23.80
  -6  -1   0  380.06   21.30
   6  -1   0  401.76   29.50
   6   1   0  374.56   22.50
   6   1   0  368.86   21.30
   6   1   0  374.76   25.80
   6   1   0  436.36   34.00
   6   1   0  395.96   26.40
   7  -1   0  625.14   43.50
   7  -1   0  590.84   37.80
   7  -1   0  713.73   40.70
   7  -1   0  625.24   46.70
   7   1   0  580.84   46.90
   7   1   0  682.33   41.80
   8  -1   0  123.69   20.10
   8  -1   0  125.89   12.30
   8  -1   0   99.59   13.10
   8  -1   0  107.89   15.70
   8   1   0  132.49   15.20
   8   1   0  137.69   22.10
   0  -2   0 6555.74  365.86
   0  -2   0 6463.35  365.36
   0  -2   0 7205.88  365.66
   0  -2   0 7291.67  365.96
   0  -2   0 6796.32  367.36
   0  -2   0 6705.53  364.86
   0   2   0 7222.28  365.46
   0   2   0 6545.54  367.06
   0   2   0 6220.98  365.96
   0   2   0 6931.61  365.46
   0   2   0 7211.38  364.86
  -1  -2   0   72.89    7.50
  -1  -2   0   70.79    7.40
   1  -2   0   58.89    6.30
   1  -2   0   60.39    5.90
  -1  -2   0   77.19    7.40
   1  -2   0   51.89    6.90
  -1  -2   0   61.79    4.50
  -1  -2   0   65.69    6.50
   1  -2   0   61.39    5.10
   1  -2   0   66.99    6.00
   1  -2   0   73.29    5.70
  -1  -2   0   69.69    6.30
   1   2   0   60.69    7.20
   1   2   0   69.89    6.20
  -1   2   0   61.19    6.30
  -1   2   0   57.39    5.20
   1   2   0   59.49    5.90
   1   2   0   60.59    6.50
   1   2   0   65.69    7.10
  -2  -2   0  980.90   58.19
   2  -2   0 1027.70   56.89
  -2  -2   0 1036.60   60.09
   2  -2   0  986.10   59.79
  -2  -2   0 1001.00   57.29
  -2  -2   0 1059.79   58.79
   2  -2   0 1102.29   56.89
   2  -2   0 1058.19   56.59
   2   2   0  977.90   57.69
   2   2   0  974.50   57.79
   2   2   0  964.70   59.59
  -2   2   0 1019.70   56.49
   2   2   0 1132.29   58.99
  -2   2   0  996.90   55.99
   2   2   0 1129.19   58.19
  -2   2   0 1017.80   56.49
   3  -2   0  536.45   30.50
  -3  -2   0  532.45   31.30
  -3  -2   0  472.95   31.60
   3  -2   0  551.84   29.50
   3  -2   0  520.95   35.00
  -3  -2   0  493.95   32.30
   3  -2   0  563.24   30.10
   3   2   0  527.85   32.20
   3   2   0  539.25   29.20
  -3   2   0  495.25   29.00
  -3   2   0  555.44   29.70
   3   2   0  680.53   37.20
   3   2   0  495.05   31.40
   3   2   0  506.35   32.40
   4  -2   0 1988.30  120.39
  -4  -2   0 2196.28  122.39
   4  -2   0 2256.27  118.29
   4  -2   0 2498.15  126.89
  -4  -2   0 2213.28  121.59
   4  -2   0 2250.67  117.99
   4   2   0 2297.17  123.09
   4   2   0 2422.36  121.79
   4   2   0 1959.30  121.89
   4   2   0 2192.48  119.79
   4   2   0 2210.08  127.59
   5  -2   0  304.47   19.10
   5  -2   0  267.97   23.70
  -5  -2   0  301.17   20.10
   5   2   0  286.07   21.50
   5   2   0  266.57   25.50
   5   2   0  284.17   18.60
   5   2   0  316.67   19.20
   5   2   0  305.47   20.40
   6  -2   0  357.86   31.00
   6  -2   0  399.66   24.80
   6  -2   0  479.85   32.40
   6  -2   0  389.76   25.60
   6   2   0  370.76   25.00
   6   2   0  441.06   34.70
   6   2   0  374.36   24.30
   6   2   0  365.66   27.50
   7  -2   0   10.10    6.90
   7  -2   0    5.80    5.70
   7  -2   0   10.00    3.90
   7  -2   0    3.60    3.70
   7   2   0    6.80    3.30
   7   2   0   13.90    9.10
   7   2   0   15.90    6.10
   8  -2   0   79.89   11.10
   8  -2   0  107.29   18.80
   8  -2   0   79.49   10.00
   8  -2   0   74.39   14.40
   8   2   0   84.69   12.90
   8   2   0  114.79   20.60
   0  -3   0    3.90    2.40
   0  -3   0    0.80    2.50
   0  -3   0   -2.50    2.60
   0  -3   0    0.40    3.40
   0  -3   0   -0.40    1.70
   0  -3   0    5.00    3.60
   0   3   0    2.30    2.10
   0   3   0    1.40    2.90
   0   3   0   -0.40    1.80
   0   3   0    0.90    2.40
   0   3   0    2.60    3.30
   1  -3   0  530.95   31.80
   1  -3   0  586.34   30.70
   1  -3   0  505.95   33.00
   1  -3   0  562.44   31.30
  -1  -3   0  569.14   33.70
   1  -3   0  538.85   32.50
  -1  -3   0  552.34   31.90
  -1  -3   0  544.15   32.00
  -1  -3   0  631.24   33.80
  -1  -3   0  482.45   30.10
  -1  -3   0  506.65   32.20
   1  -3   0  522.65   32.10
   1   3   0  509.55   31.80
  -1   3   0  494.15   31.50
   1   3   0  531.05   32.40
  -1   3   0  549.25   32.20
  -1   3   0  508.75   30.20
   1   3   0  478.15   31.80
   1   3   0  535.45   33.30
   1   3   0  518.15   32.30
  -1   3   0  499.25   30.70
  -2  -3   0 1574.74   87.49
  -2  -3   0 1539.35   86.99
   2  -3   0 1617.24   85.59
   2  -3   0 1494.35   85.49
   2  -3   0 1451.55   88.09
   2  -3   0 1623.14   84.79
  -2  -3   0 1438.86   85.29
  -2  -3   0 1474.15   87.59
   2  -3   0 1521.15   84.69
  -2   3   0 1495.25   84.79
   2   3   0 1468.35   87.59
   2   3   0 1637.54   86.49
  -2   3   0 1471.75   83.79
  -2   3   0 1604.54   85.19
   2   3   0 1810.42   86.79
   2   3   0 1493.25   86.99
   2   3   0 1441.36   85.69
   3  -3   0 3682.53  196.18
   3  -3   0 3519.95  196.58
   3  -3   0 3594.54  196.38
  -3  -3   0 3577.14  198.78
   3  -3   0 3395.36  201.38
  -3  -3   0 3641.04  198.88
  -3  -3   0 3544.15  199.28
  -3   3   0 3610.74  195.98
   3   3   0 3648.33  198.88
   3   3   0 4216.78  199.28
   3   3   0 4098.29  198.88
  -3   3   0 3418.66  195.68
  -3   3   0 3731.53  195.48
   3   3   0 3521.15  199.18
   3   3   0 3481.35  201.28
   4  -3   0   92.29   13.30
   4  -3   0   90.59    7.30
  -4  -3   0   91.19   11.10
   4  -3   0   84.79    6.40
   4  -3   0   85.39    8.00
   4   3   0   80.59   10.40
   4   3   0   89.89   11.00
   4   3   0   98.89   10.40
  -4   3   0  102.49    7.00
   4   3   0   91.09   13.30
  -4   3   0   96.59    6.20
   5  -3   0  483.25   29.30
   5  -3   0  442.06   34.80
  -5  -3   0  523.95   31.80
   5   3   0  462.35   32.00
   5   3   0  466.75   36.00
   5   3   0  446.06   31.00
   5   3   0  475.15   30.40
   6  -3   0  217.18   16.30
   6  -3   0  197.18   22.50
   6   3   0  224.18   17.80
   6   3   0  211.68   19.40
   6   3   0  266.07   25.90
   7  -3   0   14.50    4.30
   7  -3   0   15.50    7.40
   7  -3   0   14.70    5.00
   7  -3   0   26.20   10.10
   7   3   0   15.00    4.90
   7   3   0    5.40    8.20
   7   3   0    8.80    4.70
   8  -3   0  167.68   22.60
   8  -3   0  125.49   19.50
   8  -3   0  132.79   14.80
   8   3   0  161.08   18.60
   8   3   0  134.69   23.60
   0  -4   0 1661.03   96.19
   0  -4   0 1670.53   94.19
   0  -4   0 1569.14   94.49
   0  -4   0 1666.43   95.29
   0  -4   0 1712.13   96.59
   0  -4   0 1961.30   95.79
   0   4   0 1764.12   95.49
   0   4   0 1710.13   95.49
   0   4   0 1668.33   96.29
   0   4   0 1716.33   94.19
   0   4   0 1604.14   94.19
  -1  -4   0 2691.73  144.19
  -1  -4   0 2694.83  145.79
  -1  -4   0 2641.24  145.59
   1  -4   0 2871.81  148.19
  -1  -4   0 2561.74  146.99
  -1  -4   0 2672.53  147.79
   1  -4   0 2652.73  144.09
   1  -4   0 2906.61  147.19
   1  -4   0 2477.25  144.79
   1  -4   0 2777.02  146.89
  -1  -4   0 2771.42  146.49
   1  -4   0 2653.93  145.79
   1   4   0 2584.04  146.09
   1   4   0 2261.37  145.59
   1   4   0 2629.54  147.39
  -1   4   0 2627.74  144.49
  -1   4   0 2539.25  146.09
  -1   4   0 2710.63  143.89
  -1   4   0 2638.84  145.79
   1   4   0 2737.93  146.49
   1   4   0 2712.03  145.89
   2  -4   0  826.82   51.79
  -2  -4   0  847.32   48.30
   2  -4   0  953.00   50.59
  -2  -4   0  920.21   54.29
  -2  -4   0  865.01   53.99
   2  -4   0  844.42   54.99
   2  -4   0  978.70   52.89
   2  -4   0  854.51   52.29
   2  -4   0  855.41   50.99
  -2   4   0  904.01   50.29
   2   4   0  876.71   52.89
   2   4   0  841.02   52.59
   2   4   0 1032.70   55.09
   2   4   0  868.41   53.79
  -2   4   0  853.31   51.79
  -2   4   0  910.01   51.59
   3  -4   0  446.06   27.30
  -3  -4   0  384.06   29.90
   3  -4   0  440.76   27.40
   3  -4   0  395.96   27.50
   3  -4   0  433.16   27.50
   3  -4   0  445.76   32.50
  -3   4   0  486.75   27.70
   3   4   0  409.46   28.70
  -3   4   0  453.15   26.20
   3   4   0  451.25   31.70
   3   4   0  438.96   30.40
   3   4   0  459.15   29.50
  -3   4   0  431.76   27.10
   4  -4   0  346.87   28.70
   4  -4   0  394.26   24.00
  -4  -4   0  363.56   27.10
   4  -4   0  363.46   24.10
   4  -4   0  365.26   23.10
   4   4   0  341.07   29.00
   4   4   0  404.86   27.30
   4   4   0  462.05   28.60
   4   4   0  375.26   25.90
  -4   4   0  349.27   23.30
   5  -4   0  133.39   18.40
  -5  -4   0  164.78   16.90
   5  -4   0  139.09   12.10
   5  -4   0  138.49   10.30
   5  -4   0  132.99    9.20
   5   4   0  141.99   15.70
  -5   4   0  147.89    8.80
   5   4   0  161.18   14.80
   5   4   0  128.39   13.90
   5   4   0  159.78   21.10
   6  -4   0  192.78   15.20
   6  -4   0  169.58   21.50
   6   4   0  178.78   24.10
   6   4   0  197.88   18.80
   6   4   0  186.68   18.90
   7  -4   0    4.70    6.30
   7  -4   0   15.80    7.90
   7  -4   0   16.20    5.00
   7   4   0   13.00    7.70
   7   4   0   16.60    7.40
   7   4   0   18.30    5.90
   8  -4   0  252.87   30.60
   8  -4   0  354.16   24.60
   8  -4   0  306.97   33.50
   8   4   0  333.97   24.00
   8   4   0  392.96   30.00
   8   4   0  282.77   35.50
   0  -5   0    0.60    2.50
   0  -5   0   -1.90    3.20
   0  -5   0    2.70    3.70
   0  -5   0    4.00    3.80
   0  -5   0   -1.10    3.30
   0   5   0    3.40    3.40
   0   5   0   -2.70    3.10
   0   5   0    1.60    2.80
  -1  -5   0  547.95   35.90
   1  -5   0  541.95   35.00
  -1  -5   0  555.64   32.30
   1  -5   0  504.95   32.80
  -1  -5   0  527.45   33.80
  -1  -5   0  518.95   33.60
   1  -5   0  561.84   32.10
   1  -5   0  546.75   35.60
   1  -5   0  549.85   35.10
  -1   5   0  525.95   34.60
  -1   5   0  503.85   33.30
   1   5   0  500.05   35.10
  -1   5   0  507.65   32.20
  -1   5   0  491.35   31.10
   1   5   0  479.75   33.80
   1   5   0  501.95   33.50
   2  -5   0  192.48   13.80
  -2  -5   0  187.58   12.40
   2  -5   0  189.58   16.10
  -2  -5   0  202.08   17.70
  -2  -5   0  175.98   15.40
   2  -5   0  171.58   17.20
   2  -5   0  161.98   15.20
   2  -5   0  179.98   14.70
   2   5   0  180.98   17.10
   2   5   0  237.78   18.00
  -2   5   0  186.38   13.80
  -2   5   0  203.48   16.20
   2   5   0  178.58   16.20
   2   5   0  190.68   16.80
   3  -5   0  949.80   57.29
   3  -5   0  821.12   51.29
   3  -5   0  891.81   50.89
   3  -5   0  853.51   52.09
   3  -5   0  895.41   52.69
  -3  -5   0  847.92   55.09
   3   5   0  797.62   54.49
   3   5   0  897.91   54.09
   3   5   0  868.21   53.69
   3   5   0  876.41   55.89
  -3   5   0  885.81   51.79
   4  -5   0   80.49    9.70
   4  -5   0   67.19    8.50
   4  -5   0   83.89   14.60
   4  -5   0   84.79    9.80
   4  -5   0   59.09    8.70
  -4  -5   0   61.89   10.90
   4   5   0   86.89   12.90
   4   5   0   70.79   10.90
   4   5   0   81.89   11.70
   4   5   0   87.29   14.60
  -4   5   0   70.79    8.50
   5  -5   0  156.48   13.90
  -5  -5   0  173.08   18.60
   5  -5   0  148.49   11.60
   5  -5   0  128.49   18.50
   5   5   0  179.78   17.10
   5   5   0  167.48   21.20
   5   5   0  144.79   17.40
   6  -5   0  221.18   13.10
   6  -5   0  228.18   17.90
   6  -5   0  220.18   25.90
   6   5   0  197.38   26.00
   6   5   0  253.77   22.10
   6   5   0  199.48   21.30
   7  -5   0  211.48   25.90
   7   5   0  207.58   22.70
   7   5   0  209.08   28.20
   7   5   0  209.88   19.60
   0  -6   0 1189.98   67.69
   0  -6   0 1110.19   69.19
   0  -6   0 1186.98   67.79
   0  -6   0 1140.69   66.29
   0   6   0 1077.79   68.99
   0   6   0 1094.19   65.69
   0   6   0 1155.58   68.09
  -1  -6   0  643.14   42.20
   1  -6   0  675.23   41.50
  -1  -6   0  577.64   38.70
   1  -6   0  564.44   39.90
   1  -6   0  539.05   39.90
   1  -6   0  652.83   39.30
  -1  -6   0  591.34   38.90
  -1  -6   0  555.04   37.30
   1  -6   0  592.64   36.80
  -1   6   0  585.84   39.80
   1   6   0  673.43   42.30
  -1   6   0  611.24   36.50
   1   6   0  616.44   39.10
   1   6   0  616.24   40.10
  -1   6   0  625.34   39.60
  -2  -6   0  125.69   10.10
  -2  -6   0  113.59   13.60
   2  -6   0  120.69   11.00
  -2  -6   0  161.48   18.20
   2  -6   0  122.89   16.20
   2  -6   0  142.09   15.70
   2  -6   0  107.39   13.90
   2  -6   0  122.99   13.70
  -2   6   0  123.39   14.70
   2   6   0  147.99   15.30
   2   6   0  127.09   16.30
   2   6   0  145.59   15.90
   3  -6   0  610.74   37.70
   3  -6   0  638.94   44.60
   3  -6   0  581.34   40.00
   3  -6   0  614.24   39.40
  -3  -6   0  630.84   43.10
   3  -6   0  745.83   42.10
   3   6   0  709.53   44.40
  -3   6   0  578.04   39.30
   3   6   0  595.94   42.60
   3   6   0  555.44   41.10
   4  -6   0  174.98   15.20
   4  -6   0  227.28   24.40
   4  -6   0  167.88   15.40
  -4  -6   0  146.99   18.80
   4   6   0  171.38   20.40
   4   6   0  182.98   21.80
   4   6   0  150.78   18.70
  -4   6   0  213.88   15.80
   5  -6   0  139.99   12.90
   5  -6   0  193.68   23.50
  -5  -6   0  195.08   21.30
   5  -6   0  142.39   15.60
   5   6   0  172.08   19.90
   5   6   0  144.99   21.00
   5   6   0  169.68   19.80
   6  -6   0  180.28   12.50
   6  -6   0  182.08   16.90
   6  -6   0  166.68   23.40
   6   6   0  177.88   24.60
   6   6   0  198.08   21.30
   6   6   0  208.28   23.00
   7  -6   0   -3.10    7.80
   7   6   0   13.10    7.90
   7   6   0    5.60    7.90
   7   6   0    1.20    6.30
   0  -7   0    9.00    5.00
   0  -7   0    4.50    4.20
   0  -7   0   14.20    7.00
   0  -7   0    8.00    4.40
   0   7   0    7.80    6.40
   0   7   0    0.50    3.20
   0   7   0    2.60    4.80
  -1  -7   0  830.02   47.70
  -1  -7   0  798.42   52.59
   1  -7   0  842.12   52.09
   1  -7   0  867.01   49.60
   1  -7   0  700.23   49.90
   1  -7   0  742.83   46.60
  -1  -7   0  722.43   48.80
   1   7   0  705.83   51.29
   1   7   0  790.62   50.59
  -1   7   0  737.33   45.70
   1   7   0  779.02   48.80
  -1   7   0  741.83   50.29
  -2  -7   0  612.44   37.90
   2  -7   0  651.03   45.30
   2  -7   0  658.03   43.50
  -2  -7   0  575.94   44.80
   2  -7   0  604.44   43.70
  -2  -7   0  634.64   42.00
   2  -7   0  558.74   40.60
   2   7   0  697.83   43.90
  -2   7   0  623.34   42.30
   2   7   0  742.63   47.00
   2   7   0  723.73   44.80
  -3  -7   0   99.99   16.10
   3  -7   0  102.79   17.10
   3  -7   0  114.59   14.90
   3  -7   0  126.79   14.90
  -3   7   0  138.29   15.40
   3   7   0  174.38   20.30
   3   7   0  148.89   17.70
   3   7   0   99.99   16.40
  -4  -7   0   73.99   13.20
   4  -7   0   89.29   11.80
   4  -7   0   55.39    9.50
   4  -7   0   67.69   14.50
   4   7   0   42.90   10.60
   4   7   0   59.79   11.10
   4   7   0   64.49   13.60
   5  -7   0  252.97   20.30
   5  -7   0  220.88   27.30
  -5  -7   0  232.78   29.90
   5  -7   0  249.08   19.50
   5   7   0  252.87   24.30
   5   7   0  248.88   25.80
   5   7   0  217.98   27.20
   6  -7   0   47.30    6.40
   6  -7   0   41.90   14.00
   6   7   0   58.59   12.50
   6   7   0   38.90   11.40
   6   7   0   58.99   15.20
   0  -8   0  191.28   22.30
   0  -8   0  162.98   18.70
   0  -8   0  198.18   19.90
   0   8   0  181.08   17.80
   0   8   0  171.28   15.60
   0   8   0  186.58   22.10
   1  -8   0   43.20   10.30
   1  -8   0   52.69   10.10
  -1  -8   0   51.09   11.10
  -1  -8   0   42.50    8.30
   1  -8   0   52.79   11.90
  -1  -8   0   41.10    9.50
   1   8   0   38.00    9.90
  -1   8   0   38.30    9.90
  -1   8   0   48.70    7.40
   1   8   0   57.99   11.50
   1   8   0   45.70    8.90
   2  -8   0   25.90    8.90
   2  -8   0   22.90    7.20
   2  -8   0   23.20    8.10
  -2  -8   0   17.80    4.40
  -2  -8   0   15.10    7.80
   2   8   0   19.20    7.70
  -2   8   0   21.80    7.20
   2   8   0    0.90    7.90
   2   8   0   13.70    7.40
   3  -8   0   51.09    9.90
  -3  -8   0   32.80   11.10
   3  -8   0   49.99   10.40
   3  -8   0   52.79   12.20
   3   8   0   28.40    9.90
   3   8   0   48.10   10.60
   3   8   0   57.99   12.20
   4  -8   0  191.88   20.30
  -4  -8   0  194.68   24.10
   4  -8   0  266.57   28.70
   4  -8   0  186.38   19.60
   4   8   0  197.68   22.70
   4   8   0  221.68   24.80
   4   8   0  176.28   23.10
   5  -8   0   79.69   12.50
   5  -8   0  105.99   12.90
   5  -8   0  135.49   21.20
   5   8   0  106.09   17.40
   5   8   0  130.09   18.20
   5   8   0  102.99   19.20
   0  -9   0   -2.80    4.50
   0  -9   0   -7.70    3.20
   0  -9   0    2.70    5.50
   0   9   0   -2.90    4.90
   0   9   0   -0.90    4.40
   0   9   0   -2.40    3.90
  -1  -9   0   69.79   14.60
   1  -9   0   88.19   14.90
  -1  -9   0   65.19   10.40
   1  -9   0   76.99   14.10
  -1  -9   0  103.69   14.80
   1  -9   0   84.89   12.90
   1   9   0   78.99   12.20
   1   9   0   63.89   14.80
  -1   9   0   62.09   13.40
   1   9   0   78.09   14.20
   2  -9   0  201.78   24.80
   2  -9   0  218.78   24.50
  -2  -9   0  194.68   25.20
   2  -9   0  243.18   23.10
  -2   9   0  229.18   23.80
   2   9   0  195.38   20.50
   2   9   0  160.88   21.40
   2   9   0  192.98   24.30
   3  -9   0  128.49   17.60
   3  -9   0  159.58   18.00
  -3  -9   0  169.08   23.30
   3  -9   0  196.88   24.20
   3   9   0  126.39   18.60
   3   9   0  137.89   21.40
   3   9   0  114.99   17.50
   4  -9   0   15.80    6.80
   4  -9   0    8.40    8.70
  -4  -9   0   12.00    9.20
   4  -9   0    4.50    6.60
   4   9   0    6.10    8.70
   4   9   0   14.00    7.50
   4   9   0    6.10    8.70
   0 -10   0  563.24   45.80
   0 -10   0  667.23   42.80
   0 -10   0  536.85   41.40
   0  10   0  569.64   43.10
   0  10   0  581.54   45.40
  -1 -10   0   45.70   13.60
   1 -10   0   44.80   12.60
  -1 -10   0   54.59   12.00
   1 -10   0   41.70   10.30
   1 -10   0   44.70   11.90
  -1  10   0   71.29   15.50
   1  10   0   58.29   13.60
   1  10   0   38.60   12.40
   2 -10   0  168.78   20.20
   2 -10   0  120.29   20.00
  -2 -10   0  227.28   27.40
   2 -10   0  127.89   19.60
   2  10   0  173.88   22.50
   2  10   0  195.68   25.30
   3 -10   0   14.70    8.00
   3 -10   0    4.60    7.00
   3 -10   0   28.30   10.40
  -3 -10   0   26.60   11.20
   3  10   0   24.50   10.70
   3  10   0   34.20   12.30
   8   0  -1  133.09   15.50
   8   0  -1  124.59   20.90
   8   0  -1  136.59   19.00
   7   0  -1  245.48   20.60
   7   0  -1  259.57   20.00
   7   0  -1  255.77   26.60
   6   0  -1    1.10    4.70
   6   0  -1    6.90    7.00
   6   0  -1    3.20    1.10
   6   0  -1    1.60    3.40
   6   0  -1    2.80    1.60
   5   0  -1  616.04   35.50
   5   0  -1  668.13   39.40
   5   0  -1  612.44   34.10
   5   0  -1  615.74   37.50
  -5   0   1  630.94   35.20
  -5   0   1  623.04   34.00
   4   0  -1    6.90    3.40
   4   0  -1    4.80    2.00
   4   0  -1   11.40    3.20
  -4   0   1    4.20    1.10
  -4   0   1    5.20    1.80
   4   0  -1    5.20    1.10
   3   0  -1 3190.58  177.28
   3   0  -1 3576.64  179.68
   3   0  -1 3125.49  177.98
   3   0  -1 3565.34  176.58
  -3   0   1 3313.67  179.98
  -3   0   1 3115.39  177.08
   2   0  -1 1589.44   77.99
  -2   0   1 1450.45   77.59
   2   0  -1 1457.05   79.39
  -2   0   1 1385.16   79.39
   2   0  -1 1397.76   78.39
  -2   0   1 1489.75   77.89
   2   0  -1 1368.16   77.49
   1   0  -1 1428.86   83.39
  -1   0   1 1575.14   83.49
  -1   0   1 1594.74   84.19
   1   0  -1 1416.26   83.99
  -1   0   1 1615.84   83.49
   1   0  -1 1743.73   83.69
   0   0   1  938.61   46.70
   0   0   1  897.81   46.90
   0   0   1  859.21   47.20
   0   0   1  861.21   46.70
   0   0  -1  773.02   46.60
   0   0  -1  869.01   47.20
   0   0   1  936.01   46.70
   0   0  -1  868.71   46.70
   0   0  -1  840.52   46.90
   1   0   1  287.67   18.40
   1   0   1  317.97   16.60
  -1   0  -1  279.77   16.70
   1   0   1  314.87   16.80
  -1   0  -1  299.17   16.70
   1   0   1  311.97   16.80
  -1   0  -1  297.67   18.60
   2   0   1 1529.45   83.39
   2   0   1 1517.95   82.79
  -2   0  -1 1566.74   82.79
  -2   0  -1 1529.25   82.29
   2   0   1 1441.76   82.39
   2   0   1 1704.53   86.79
   3   0   1 4782.02  273.37
   3   0   1 5019.00  272.17
   3   0   1 4752.62  277.17
  -3   0  -1 5518.05  272.37
  -3   0  -1 5288.47  271.87
   3   0   1 5262.47  272.57
   4   0   1   28.30    1.80
   4   0   1   24.90    1.80
   4   0   1   29.60    4.40
   4   0   1   29.90    7.10
   4   0   1   35.50    6.60
   5   0   1  745.63   43.70
   5   0   1  672.83   40.50
   5   0   1  629.14   45.80
   6   0   1    0.60    4.10
   6   0   1    2.10    3.70
   6   0   1   -1.00    4.00
   7   0   1   19.40    9.80
   7   0   1   33.30    7.00
   7   0   1   24.00    7.20
   8   0   1    7.90    5.20
   8   0   1   21.50   10.90
   8   0   1   11.60    4.40
   8  -1  -1  407.76   34.90
   8  -1  -1  323.57   25.20
   8  -1  -1  351.16   23.10
   8   1  -1  345.07   26.90
   8   1  -1  317.87   32.70
   7  -1  -1   10.90    6.00
   7  -1  -1   19.20    5.60
   7  -1  -1    8.10    8.70
   7  -1  -1   16.20    3.50
   7   1  -1    5.20    3.90
   7   1  -1    5.60    4.10
   7   1  -1    8.70    2.80
   7   1  -1   27.10   10.60
  -6  -1   1  163.48   11.70
   6  -1  -1  151.08   16.70
   6  -1  -1  143.39   13.10
   6  -1  -1  180.78   11.80
   6   1  -1  135.59   13.70
   6   1  -1  159.28   10.00
   6   1  -1  174.48   12.30
   6   1  -1  165.58   21.50
   6   1  -1  143.99   13.10
   5  -1  -1  260.47   15.10
   5  -1  -1  265.27   18.20
   5  -1  -1  271.57   15.00
   5  -1  -1  254.87   21.00
   5   1  -1  235.68   22.60
   5   1  -1  273.37   15.90
   5   1  -1  267.27   18.90
   5   1  -1  268.77   17.80
   5   1  -1  270.57   18.20
   4  -1  -1  897.61   51.09
  -4  -1   1 1013.40   52.09
   4  -1  -1  903.71   56.09
   4  -1  -1  926.81   51.09
  -4  -1   1  931.51   52.89
  -4   1   1  950.60   51.09
   4   1  -1  989.50   53.69
   4   1  -1  902.11   53.79
   4   1  -1  969.60   51.99
  -4   1   1  930.71   50.99
   4   1  -1  947.91   53.29
   3  -1  -1  321.77   18.30
  -3  -1   1  323.87   20.10
   3  -1  -1  332.67   18.50
  -3  -1   1  311.97   19.50
   3  -1  -1  325.07   17.90
  -3  -1   1  307.67   19.20
   3  -1  -1  306.87   21.90
  -3  -1   1  317.47   19.80
  -3   1   1  335.47   18.40
   3   1  -1  352.06   20.50
   3   1  -1  298.07   19.10
   3   1  -1  324.57   19.40
  -3   1   1  332.67   17.90
   3   1  -1  316.67   20.00
  -2  -1   1 2052.39   99.19
   2  -1  -1 1955.10   97.99
   2  -1  -1 1762.52  100.89
   2  -1  -1 1769.12   98.19
   2  -1  -1 1731.03   97.89
  -2  -1   1 1727.63   98.69
  -2  -1   1 1774.22   99.39
  -2  -1   1 1695.63   99.09
  -2   1   1 1859.71  101.39
   2   1  -1 2138.19   99.69
  -2   1   1 1827.92   98.39
  -2   1   1 1728.23   97.89
   2   1  -1 1723.93   98.89
   2   1  -1 2034.00   99.59
   2   1  -1 1790.52   98.39
   2   1  -1 1765.42   99.49
   1  -1  -1 2048.59  115.59
   1  -1  -1 2089.79  114.99
   1  -1  -1 2007.00  115.89
   1  -1  -1 2363.66  115.19
  -1  -1   1 2027.80  115.29
  -1  -1   1 2047.60  115.39
   1  -1  -1 2009.50  114.79
  -1  -1   1 2161.08  115.49
  -1  -1   1 2190.88  115.09
  -1  -1   1 1987.50  114.89
  -1   1   1 2145.39  115.09
   1   1  -1 2231.48  114.79
   1   1  -1 2451.45  115.99
   1   1  -1 2174.28  115.19
  -1   1   1 2168.28  114.19
   1   1  -1 2112.19  115.29
  -1   1   1 2140.39  116.19
   1   1  -1 2189.18  115.29
  -1   1   1 2176.68  114.79
   0  -1   1 1927.31  101.89
   0  -1  -1 1868.81  101.89
   0  -1  -1 2025.50  102.19
   0  -1   1 1944.81  101.89
   0  -1  -1 1881.61  102.09
   0  -1   1 1914.01  101.49
   0  -1   1 2159.78  102.09
   0  -1  -1 1867.61  101.49
   0   1   1 1800.52  101.99
   0   1   1 1919.71  101.69
   0   1   1 1837.22  102.49
   0   1  -1 1880.21  101.79
   0   1  -1 1694.83  101.39
   0   1  -1 1816.52  101.99
   0   1   1 1854.81  101.89
   0   1   1 1975.00  102.29
   0   1  -1 1851.81  101.69
  -1  -1  -1  421.76   24.70
  -1  -1  -1  393.66   25.00
  -1  -1  -1  516.65   27.10
   1  -1   1  420.16   24.50
  -1  -1  -1  439.16   25.40
   1  -1   1  466.05   24.90
   1  -1   1  438.26   24.20
   1  -1   1  434.96   24.10
   1   1   1  470.15   25.50
   1   1   1  413.36   26.30
   1   1   1  428.86   25.20
   1   1   1  421.36   23.80
   1   1   1  413.76   24.90
  -1   1  -1  424.06   24.20
  -1   1  -1  448.76   24.00
  -2  -1  -1 1331.77   74.39
   2  -1   1 1243.88   72.69
   2  -1   1 1290.17   69.49
   2  -1   1 1254.97   70.89
  -2  -1  -1 1392.36   71.79
  -2  -1  -1 1232.08   70.99
   2  -1   1 1287.67   69.79
  -2  -1  -1 1281.07   71.49
  -2   1  -1 1289.37   69.39
  -2   1  -1 1290.77   69.79
   2   1   1 1521.35   75.19
   2   1   1 1417.36   71.69
   2   1   1 1222.68   71.69
   2   1   1 1271.97   71.59
   3  -1   1  779.82   45.10
   3  -1   1  875.11   49.10
  -3  -1  -1  773.22   45.50
  -3  -1  -1  786.82   45.40
   3   1   1  753.12   49.50
   3   1   1  860.81   45.60
   3   1   1  793.92   46.10
   3   1   1  854.41   45.40
  -4  -1  -1  434.56   24.60
   4  -1   1  445.76   29.70
   4  -1   1  389.66   25.00
   4  -1   1  399.86   29.40
   4  -1   1  387.66   24.80
  -4  -1  -1  391.46   24.30
   4   1   1  436.36   24.60
   4   1   1  421.86   26.40
   4   1   1  426.36   31.00
   4   1   1  446.16   24.80
   4   1   1  441.66   27.10
   5  -1   1   43.30    9.30
  -5  -1  -1   40.80    4.10
   5  -1   1   47.50    9.70
   5  -1   1   44.60    6.10
  -5  -1  -1   37.50    4.00
   5  -1   1   47.70    5.80
   5   1   1   41.80    4.50
   5   1   1   52.89    7.50
   5   1   1   38.30    9.90
   5   1   1   49.90    4.50
   5   1   1   49.99    7.40
   6  -1   1  605.14   36.20
   6  -1   1  575.94   41.50
   6  -1   1  600.44   37.20
   6  -1   1  718.93   45.80
   6   1   1  705.83   46.70
   6   1   1  593.94   33.40
   6   1   1  584.84   38.20
   6   1   1  554.34   38.30
   6   1   1  602.04   33.10
   7  -1   1  113.99   17.60
   7  -1   1   78.39   13.50
   7  -1   1   78.89   10.40
   7  -1   1   98.69   10.20
   7   1   1   87.09   11.80
   7   1   1   76.79   11.10
   7   1   1  130.79   20.30
   8  -1   1  417.66   30.20
   8  -1   1  404.66   33.30
   8  -1   1  434.06   28.60
   8  -1   1  447.26   38.10
   8   1   1  410.96   31.50
   8   1   1  448.96   39.90
   8  -2  -1  124.49   14.10
   8  -2  -1  136.99   18.40
   8  -2  -1  131.89   21.00
   8   2  -1  111.69   15.30
   8   2  -1  116.19   21.30
   7  -2  -1  442.36   30.30
   7  -2  -1  494.85   29.20
   7  -2  -1  417.16   34.30
   7   2  -1  522.15   33.60
   7   2  -1  455.85   29.40
   7   2  -1  438.66   38.50
  -6  -2   1  389.86   26.10
   6  -2  -1  396.06   24.70
   6  -2  -1  401.56   25.90
   6  -2  -1  454.05   31.80
   6   2  -1  415.46   24.10
   6   2  -1  376.66   32.80
   6   2  -1  380.96   26.10
   6   2  -1  368.96   27.40
   6   2  -1  391.56   24.40
  -5  -2   1  486.45   29.40
   5  -2  -1  444.26   32.10
   5  -2  -1  480.75   27.00
   5  -2  -1  435.56   24.60
   5  -2  -1  435.36   25.00
   5   2  -1  427.76   27.00
   5   2  -1  498.75   30.00
   5   2  -1  474.45   26.60
   5   2  -1  409.96   33.70
   5   2  -1  407.36   28.70
  -4  -2   1  126.49   10.00
   4  -2  -1  112.49    8.10
   4  -2  -1  135.19   14.50
   4  -2  -1  106.49    6.80
   4  -2  -1  124.29    8.30
  -4   2   1  112.59    6.80
   4   2  -1  102.69   10.20
   4   2  -1  107.29   10.00
   4   2  -1  111.59    7.70
   4   2  -1  110.09    9.30
  -4   2   1  109.99    8.00
   4   2  -1  106.99   11.30
   4   2  -1  111.09   14.50
   3  -2  -1  811.92   41.40
  -3  -2   1  684.93   43.10
   3  -2  -1  718.23   41.70
  -3  -2   1  721.93   41.10
   3  -2  -1  699.43   45.20
   3  -2  -1  694.73   40.70
  -3  -2   1  686.13   42.80
  -3  -2   1  888.31   43.00
   3   2  -1  697.63   46.00
   3   2  -1  755.72   43.40
   3   2  -1  789.42   40.40
   3   2  -1  763.42   43.00
   3   2  -1  758.32   43.50
   3   2  -1  708.33   43.70
  -3   2   1  715.93   41.60
  -2  -2   1  719.53   43.30
  -2  -2   1  807.72   41.70
  -2  -2   1  769.92   43.80
   2  -2  -1  726.53   45.50
   2  -2  -1  772.92   42.40
   2  -2  -1  828.02   43.10
  -2  -2   1  707.33   44.00
   2  -2  -1  872.81   43.70
  -2  -2   1  808.92   44.50
  -2   2   1  724.93   42.70
  -2   2   1  707.83   41.90
   2   2  -1  709.13   44.70
  -2   2   1  719.63   43.40
   2   2  -1  876.31   44.40
   2   2  -1  738.33   44.10
   2   2  -1  754.42   45.90
   2   2  -1  800.92   44.10
  -2   2   1  804.12   46.30
   1  -2  -1 3652.73  196.68
   1  -2  -1 3832.42  195.98
  -1  -2   1 3639.34  197.28
   1  -2  -1 3454.65  196.58
   1  -2  -1 4025.90  198.08
  -1  -2   1 3665.93  197.28
   1  -2  -1 3686.23  196.88
  -1  -2   1 3338.57  196.68
  -1  -2   1 3608.64  196.38
   1  -2  -1 3732.73  197.08
  -1   2   1 4094.39  196.98
   1   2  -1 3467.65  196.58
  -1   2   1 3745.23  195.78
   1   2  -1 3604.64  197.18
  -1   2   1 3752.62  197.18
   1   2  -1 3518.25  196.98
  -1   2   1 3553.94  197.78
  -1   2   1 3541.35  196.58
   1   2  -1 3623.54  196.78
   1   2  -1 3680.63  197.88
   0  -2   1 4723.93  262.17
   0  -2   1 4344.37  261.87
   0  -2  -1 4843.02  261.97
   0  -2   1 5118.69  262.37
   0  -2  -1 4812.62  262.97
   0  -2  -1 4688.23  262.67
   0  -2  -1 4704.13  262.87
   0  -2  -1 5234.78  262.07
   0  -2   1 5149.28  262.77
   0  -2   1 4757.82  262.57
   0  -2  -1 5023.50  262.47
   0   2   1 4662.53  262.97
   0   2   1 5074.39  262.17
   0   2   1 5093.99  262.27
   0   2  -1 4993.50  262.97
   0   2  -1 5335.27  262.27
   0   2   1 4754.12  262.77
   0   2  -1 5382.06  263.37
   0   2  -1 4852.11  262.47
   0   2   1 4462.55  262.57
   1  -2   1 4677.33  241.78
  -1  -2  -1 4371.96  243.78
   1  -2   1 4387.36  241.88
  -1  -2  -1 4430.96  243.18
  -1  -2  -1 4479.05  242.38
  -1  -2  -1 4435.16  243.18
  -1  -2  -1 4645.24  241.48
   1  -2   1 4749.72  242.08
   1  -2   1 4406.06  241.78
  -1   2  -1 4423.46  241.68
  -1   2  -1 4614.74  242.28
   1   2   1 4626.24  241.68
   1   2   1 4502.95  243.78
  -1   2  -1 3911.11  241.28
   1   2   1 4495.85  242.58
   1   2   1 4573.44  243.18
   1   2   1 5178.88  243.88
   1   2   1 4440.16  242.28
  -2  -2  -1   59.49    8.60
   2  -2   1   53.09    5.20
   2  -2   1   57.09    5.70
   2  -2   1   62.49    5.80
  -2  -2  -1   57.89    7.20
  -2  -2  -1   71.79    7.90
  -2  -2  -1   70.69    6.40
   2   2   1   73.09    4.10
   2   2   1   58.39    7.00
  -2   2  -1   69.59    5.40
   2   2   1   64.59    6.40
   2   2   1   64.19    8.80
  -2   2  -1   68.49    5.20
  -3  -2  -1 3114.79  174.28
   3  -2   1 3119.99  171.48
  -3  -2  -1 3099.79  174.18
  -3  -2  -1 3370.46  173.58
   3  -2   1 3162.88  173.08
   3  -2   1 3120.19  171.18
   3   2   1 3221.38  172.18
   3   2   1 3097.89  178.08
   3   2   1 3158.88  174.38
  -3   2  -1 3245.38  171.48
  -3   2  -1 3322.07  170.88
   3   2   1 3048.79  174.38
   3   2   1 3640.34  174.38
  -4  -2  -1   95.99    8.60
  -4  -2  -1  112.49    9.10
   4  -2   1   67.19   11.30
   4  -2   1  106.09   12.70
   4  -2   1   90.29    7.80
   4   2   1   90.99    7.60
   4   2   1   87.09    9.10
   4   2   1   91.29   10.20
   4   2   1   82.79    8.70
   4   2   1   87.49   13.40
  -5  -2  -1  131.59   10.60
   5  -2   1  133.09   10.50
   5  -2   1  140.19   17.10
   5  -2   1  120.09   10.30
   5  -2   1  157.68   17.50
   5   2   1  140.29   11.10
   5   2   1  103.49   16.50
   5   2   1  116.29   13.00
   5   2   1  117.59   10.20
   5   2   1  128.39   10.40
   6  -2   1  177.88   20.40
   6  -2   1  192.78   14.40
   6  -2   1  188.58   14.60
   6  -2   1  185.98   21.60
   6   2   1  187.68   14.10
   6   2   1  192.08   16.80
   6   2   1  168.68   13.30
   6   2   1  175.78   22.60
   7  -2   1  342.97   31.30
   7  -2   1  367.16   25.10
   7  -2   1  353.46   30.30
   7  -2   1  365.26   24.60
   7   2   1  346.17   32.80
   7   2   1  355.76   27.00
   7   2   1  351.76   21.40
   8  -2   1   18.30    8.80
   8  -2   1   20.10    6.50
   8  -2   1   26.60    9.10
   8  -2   1   20.60    5.70
   8   2   1   24.70   10.70
   8   2   1   34.80    8.80
   8  -3  -1  219.18   24.40
   8  -3  -1  192.38   24.70
   8  -3  -1  198.08   16.80
   8   3  -1  186.68   26.80
   8   3  -1  204.18   16.40
   8   3  -1  159.58   19.90
   7  -3  -1    3.50    3.00
   7  -3  -1    6.90    7.10
   7  -3  -1    8.20    4.30
   7   3  -1   10.10    4.70
   7   3  -1    3.30    5.30
   7   3  -1    7.40    6.30
   6  -3  -1  432.96   36.20
   6  -3  -1  489.95   30.40
   6   3  -1  511.35   28.30
   6   3  -1  464.25   38.40
   6   3  -1  572.04   35.10
   6   3  -1  478.35   33.00
  -5  -3   1  453.55   31.80
   5  -3  -1  466.05   35.10
   5  -3  -1  458.45   26.30
   5  -3  -1  454.85   27.70
   5  -3  -1  534.85   29.20
  -5   3   1  500.75   27.10
   5   3  -1  475.75   26.00
  -5   3   1  475.35   26.10
   5   3  -1  474.65   30.00
   5   3  -1  451.55   31.70
   5   3  -1  508.35   32.60
   5   3  -1  448.16   36.30
  -4  -3   1    7.50    3.70
   4  -3  -1    8.80    2.10
   4  -3  -1   10.80    2.80
   4  -3  -1    7.80    4.40
   4  -3  -1    3.70    2.60
   4   3  -1   11.30    4.40
   4   3  -1    9.10    5.00
   4   3  -1    1.10    3.00
   4   3  -1    3.60    3.10
  -3  -3   1   95.69   10.90
   3  -3  -1  133.89   10.10
  -3  -3   1  110.89    9.60
   3  -3  -1  117.29    8.90
   3  -3  -1  111.99    8.60
   3  -3  -1  133.59   14.20
   3   3  -1  109.59   10.10
  -3   3   1  100.39    8.10
   3   3  -1   92.79   11.70
   3   3  -1  114.39   10.40
  -3   3   1  125.69   10.20
   3   3  -1  114.79   14.00
  -3   3   1  118.69    8.00
   3   3  -1  121.19   10.70
   2  -3  -1 1573.04   88.09
  -2  -3   1 1521.65   87.89
  -2  -3   1 1744.33   89.79
  -2  -3   1 1523.55   88.39
  -2  -3   1 1697.43   85.39
   2  -3  -1 1527.85   86.99
  -2  -3   1 1646.54   89.49
   2  -3  -1 1527.85   90.39
   2  -3  -1 1594.54   88.69
   2  -3  -1 1600.24   88.19
   2   3  -1 1584.94   88.99
   2   3  -1 1522.55   88.59
   2   3  -1 1627.84   88.99
   2   3  -1 1523.85   89.89
  -2   3   1 1588.54   88.69
  -2   3   1 1616.94   86.59
  -2   3   1 1643.84   87.99
   2   3  -1 1564.54   90.09
  -1  -3   1 2119.49  115.39
  -1  -3   1 2199.48  115.29
   1  -3  -1 2352.16  116.49
  -1  -3   1 1880.61  115.09
   1  -3  -1 1942.21  114.19
  -1  -3   1 2088.69  116.39
   1  -3  -1 2071.39  115.69
   1  -3  -1 2032.10  116.29
   1  -3  -1 2022.20  115.29
   1  -3  -1 2356.86  115.29
  -1  -3   1 2136.49  116.09
  -1   3   1 2173.48  114.29
   1   3  -1 2009.10  115.29
  -1   3   1 1939.61  114.49
   1   3  -1 2041.60  116.59
   1   3  -1 2362.36  115.79
   1   3  -1 2309.47  116.09
  -1   3   1 2006.00  116.49
   1   3  -1 2014.20  115.19
  -1   3   1 2054.79  115.59
  -1   3   1 2050.59  115.99
   0  -3   1 7808.72  422.36
   0  -3  -1 7955.70  420.66
   0  -3   1 8337.87  421.26
   0  -3  -1 8020.80  421.56
   0  -3  -1 8154.48  422.56
   0  -3  -1 8084.79  421.76
   0  -3  -1 7956.70  422.46
   0  -3  -1 8015.20  420.86
   0  -3   1 8122.29  422.06
   0  -3   1 7911.71  421.66
   0  -3   1 7969.90  421.06
   0   3   1 8074.39  421.26
   0   3  -1 7645.64  420.76
   0   3  -1 7631.04  422.96
   0   3   1 7827.12  422.46
   0   3   1 7597.04  421.96
   0   3   1 7778.62  420.76
   0   3   1 7812.22  421.56
   0   3  -1 7154.28  422.36
   0   3  -1 7876.21  421.36
   0   3   1 7583.24  421.46
   0   3  -1 7881.11  422.36
  -1  -3  -1   36.00    6.40
  -1  -3  -1   32.30    5.30
  -1  -3  -1   27.00    5.80
  -1  -3  -1   32.70    3.60
   1  -3   1   30.30    5.30
   1  -3   1   33.60    3.10
   1  -3   1   27.20    4.40
   1  -3   1   40.50    5.40
  -1  -3  -1   32.10    5.60
   1   3   1   23.10    5.50
   1   3   1   21.70    5.60
   1   3   1   35.60    5.40
   1   3   1   37.00    4.20
  -1   3  -1   42.40    5.50
  -1   3  -1   26.30    4.20
   1   3   1   33.40    5.30
  -1   3  -1   23.20    5.00
   1   3   1   31.20    6.40
  -2  -3  -1   73.69   10.10
  -2  -3  -1   68.59    8.80
   2  -3   1   61.89    7.70
   2  -3   1   71.79    7.70
  -2  -3  -1   65.19    8.80
   2  -3   1   73.79    7.90
  -2  -3  -1   63.19    7.80
  -2   3  -1   75.49    6.90
  -2   3  -1   94.49    7.80
   2   3   1   74.99   10.10
   2   3   1   80.99    9.70
  -2   3  -1   86.29    6.50
   2   3   1   71.99    8.80
   2   3   1   87.49    9.20
   3  -3   1  174.58   11.70
  -3  -3  -1  195.28   15.00
   3  -3   1  145.89   11.90
   3  -3   1  160.48   12.00
   3   3   1  169.88   14.10
  -3   3  -1  178.38   11.50
  -3   3  -1  165.28   11.20
   3   3   1  178.08   13.70
   3   3   1  164.78   13.80
   3   3   1  176.58   17.10
   4  -3   1  208.98   13.00
   4  -3   1  215.78   13.00
   4  -3   1  251.57   21.30
  -4  -3  -1  223.48   17.10
   4  -3   1  227.58   15.60
   4   3   1  238.68   17.60
  -4   3  -1  219.88   12.60
   4   3   1  224.28   20.70
  -4   3  -1  216.48   12.50
   4   3   1  205.48   17.10
   4   3   1  209.68   16.40
   5  -3   1  339.27   22.20
   5  -3   1  335.07   26.00
  -5  -3  -1  328.67   23.30
   5  -3   1  335.47   28.80
   5   3   1  344.57   18.70
   5   3   1  330.17   24.50
   5   3   1  316.47   18.40
   5   3   1  365.56   23.30
   5   3   1  325.57   28.90
   5   3   1  330.07   23.50
   6  -3   1  262.27   25.50
   6  -3   1  280.47   19.70
   6  -3   1  298.87   24.80
   6   3   1  258.07   21.80
   6   3   1  258.77   19.80
   6   3   1  268.57   26.80
   7  -3   1   80.49   14.60
   7  -3   1  106.99   17.00
   7  -3   1   89.39   10.80
   7  -3   1   97.99   11.40
   7   3   1   97.69   10.20
   7   3   1  109.49   14.60
   7   3   1  117.79   20.80
   8  -3   1  284.27   21.90
   8  -3   1  294.87   21.90
   8  -3   1  250.67   29.20
   8  -3   1  285.87   28.20
   8   3   1  295.27   25.30
   8   3   1  241.78   32.00
   8  -4  -1  149.19   14.30
   8  -4  -1  126.09   19.80
   8  -4  -1  130.89   19.80
   8   4  -1  136.49   18.20
   8   4  -1  132.69   22.00
   8   4  -1  134.59   14.80
   7  -4  -1   93.89   15.30
   7  -4  -1   94.39   10.30
   7   4  -1   81.99   12.10
   7   4  -1   96.59   13.70
   7   4  -1   83.09   16.40
   6  -4  -1  265.17   18.80
   6  -4  -1  259.27   15.20
   6  -4  -1  285.77   26.20
   6   4  -1  262.97   21.90
   6   4  -1  291.27   28.00
   6   4  -1  269.27   22.40
   5  -4  -1  333.67   21.60
   5  -4  -1  311.17   28.00
  -5  -4   1  313.37   25.30
   5  -4  -1  335.67   21.90
   5  -4  -1  331.37   19.60
   5   4  -1  311.97   25.40
   5   4  -1  345.27   23.90
   5   4  -1  325.17   25.00
  -5   4   1  337.67   19.20
   5   4  -1  327.87   28.50
   4  -4  -1  509.45   35.80
   4  -4  -1  461.15   29.20
   4  -4  -1  533.35   31.20
   4  -4  -1  505.05   32.10
  -4  -4   1  442.46   33.40
   4  -4  -1  430.26   29.60
   4   4  -1  453.75   35.20
   4   4  -1  477.95   32.80
  -4   4   1  545.65   28.60
   4   4  -1  438.86   33.10
  -4   4   1  502.55   28.90
   4   4  -1  562.34   32.90
  -3  -4   1 1224.78   77.49
   3  -4  -1 1456.25   79.59
   3  -4  -1 1342.87   74.89
   3  -4  -1 1256.17   75.19
   3  -4  -1 1365.86   74.59
   3  -4  -1 1261.37   73.79
  -3   4   1 1257.27   72.39
   3   4  -1 1332.57   76.09
   3   4  -1 1259.47   78.09
   3   4  -1 1454.35   78.49
   3   4  -1 1281.17   75.89
  -3   4   1 1386.76   74.19
   2  -4  -1  198.98   14.20
   2  -4  -1  188.38   15.10
   2  -4  -1  181.48   16.70
  -2  -4   1  229.58   17.10
   2  -4  -1  183.18   14.80
   2  -4  -1  211.98   16.10
   2  -4  -1  149.39   13.10
  -2  -4   1  184.28   15.30
  -2  -4   1  178.48   14.60
  -2   4   1  215.48   13.40
   2   4  -1  180.38   15.20
   2   4  -1  166.38   16.40
  -2   4   1  188.68   15.60
  -2   4   1  215.08   15.20
   2   4  -1  191.78   15.70
   2   4  -1  212.58   16.50
   2   4  -1  172.88   15.00
  -1  -4   1 2494.35  139.69
  -1  -4   1 2567.04  138.29
  -1  -4   1 2787.22  138.59
   1  -4  -1 2542.55  139.59
   1  -4  -1 2537.15  137.79
   1  -4  -1 2551.74  139.29
   1  -4  -1 2534.25  139.69
   1  -4  -1 2494.95  137.49
   1  -4  -1 2553.94  138.89
  -1  -4   1 2528.45  138.79
   1   4  -1 2502.65  138.29
  -1   4   1 2498.25  138.79
   1   4  -1 2498.35  138.59
  -1   4   1 2396.26  139.39
  -1   4   1 2431.26  137.09
   1   4  -1 2504.55  138.89
   1   4  -1 2516.75  140.19
  -1   4   1 2381.26  137.29
   1   4  -1 2486.25  137.99
   0  -4   1 1298.57   76.29
   0  -4   1 1362.16   79.19
   0  -4  -1 1381.86   78.49
   0  -4   1 1352.76   79.29
   0  -4  -1 1355.46   77.79
   0  -4   1 1401.66   78.49
   0  -4  -1 1398.46   79.99
   0  -4  -1 1406.16   79.99
   0  -4   1 1358.66   78.09
   0  -4  -1 1307.87   77.49
   0  -4  -1 1362.46   78.59
   0   4  -1 1406.06   76.49
   0   4  -1 1443.96   79.99
   0   4  -1 1469.55   78.29
   0   4   1 1370.86   77.89
   0   4  -1 1495.35   78.99
   0   4   1 1367.46   78.49
   0   4   1 1412.66   80.29
   0   4   1 1367.66   78.69
   0   4  -1 1428.96   78.59
   0   4   1 1386.46   79.59
   1  -4   1   57.49    5.30
  -1  -4  -1   75.89   10.00
  -1  -4  -1   64.69    5.90
  -1  -4  -1   60.09    8.30
  -1  -4  -1   61.79    9.30
  -1  -4  -1   63.19    9.50
   1  -4   1   69.49    8.10
   1  -4   1   53.49    8.50
  -1  -4  -1   65.79    7.90
   1  -4   1   62.09    8.50
   1  -4   1   59.89    7.70
  -1   4  -1   73.49    7.90
  -1   4  -1   67.69    8.30
  -1   4  -1   65.09    8.70
   1   4   1   61.99    9.00
   1   4   1   57.79    8.90
   1   4   1   54.69    7.60
   1   4   1   56.89    8.10
  -2  -4  -1  442.56   24.90
   2  -4   1  440.26   29.20
   2  -4   1  447.96   29.00
   2  -4   1  412.86   28.50
  -2  -4  -1  424.46   30.40
   2  -4   1  427.26   28.30
  -2  -4  -1  477.85   31.90
   2  -4   1  466.05   26.60
  -2   4  -1  484.35   28.50
  -2   4  -1  465.55   27.60
   2   4   1  436.86   29.70
   2   4   1  459.35   31.10
   2   4   1  493.95   30.50
   2   4   1  486.15   31.30
  -2   4  -1  457.45   29.00
   3  -4   1  306.37   19.40
   3  -4   1  295.27   20.10
   3  -4   1  269.67   19.60
   3  -4   1  316.67   20.60
  -3  -4  -1  340.67   23.50
   3  -4   1  304.57   25.30
  -3   4  -1  278.87   19.60
   3   4   1  303.47   22.30
  -3   4  -1  317.37   19.90
  -3   4  -1  295.67   20.30
   3   4   1  283.37   23.70
   3   4   1  271.17   21.30
   3   4   1  287.27   22.30
   4  -4   1   67.79    7.00
  -4  -4  -1   65.09    9.80
   4  -4   1   58.69   11.20
   4  -4   1   67.99    8.60
   4  -4   1   69.29    7.00
   4   4   1   59.69    9.70
   4   4   1   78.09   10.20
  -4   4  -1   64.99    6.30
   4   4   1   65.99   12.60
   4   4   1   64.09   10.10
   5  -4   1  614.84   44.80
  -5  -4  -1  568.74   39.90
   5  -4   1  620.84   34.30
   5  -4   1  657.03   39.00
   5  -4   1  640.04   34.50
  -5   4  -1  624.74   33.60
   5   4   1  600.24   45.40
   5   4   1  658.53   41.80
   5   4   1  592.44   40.10
   6  -4   1  260.47   19.50
   6  -4   1  254.27   25.10
   6  -4   1  254.47   22.80
   6   4   1  259.77   20.60
   6   4   1  253.17   22.50
   6   4   1  237.88   26.00
   7  -4   1  110.39   16.60
   7  -4   1  114.19   12.30
   7  -4   1  100.49   12.10
   7  -4   1  130.19   19.20
   7   4   1   97.19   18.40
   7   4   1  137.79   17.10
   7   4   1   90.49   11.90
   7  -5  -1   45.20   11.50
   7   5  -1   42.50   12.00
   7   5  -1   38.10   10.20
   7   5  -1   24.40    7.70
   6  -5  -1   36.80    4.10
   6  -5  -1   50.49    7.60
   6  -5  -1   39.60   11.60
   6   5  -1   56.39   10.80
   6   5  -1   45.20   13.30
   6   5  -1   49.60   10.50
  -5  -5   1  467.25   33.40
   5  -5  -1  509.85   37.10
   5  -5  -1  465.85   29.10
   5  -5  -1  463.65   27.40
   5   5  -1  414.36   32.10
   5   5  -1  416.16   35.80
   5   5  -1  390.56   32.40
   4  -5  -1  257.97   20.10
   4  -5  -1  320.87   25.90
   4  -5  -1  286.07   19.20
   4  -5  -1  294.57   19.40
   4  -5  -1  284.87   20.40
  -4  -5   1  274.27   23.70
   4   5  -1  271.37   24.50
  -4   5   1  277.77   18.70
   4   5  -1  214.58   20.30
   4   5  -1  221.58   20.40
   4   5  -1  254.67   23.20
   3  -5  -1  299.87   22.40
   3  -5  -1  313.97   22.30
  -3  -5   1  337.47   17.80
  -3  -5   1  304.77   17.90
   3  -5  -1  307.87   25.90
   3  -5  -1  349.67   22.30
   3  -5  -1  277.77   23.20
  -3  -5   1  311.57   25.60
   3   5  -1  408.16   27.80
  -3   5   1  346.87   22.80
   3   5  -1  365.16   25.10
  -3   5   1  324.67   20.60
   3   5  -1  330.37   26.00
   3   5  -1  320.67   24.40
  -2  -5   1  576.44   33.00
  -2  -5   1  478.95   37.00
   2  -5  -1  503.95   33.60
   2  -5  -1  518.65   36.90
   2  -5  -1  589.14   34.40
   2  -5  -1  531.85   36.00
   2  -5  -1  568.94   35.70
  -2  -5   1  599.24   36.10
   2   5  -1  629.44   38.60
  -2   5   1  549.54   35.30
   2   5  -1  527.75   35.80
  -2   5   1  558.74   33.20
   2   5  -1  524.75   35.70
   1  -5  -1 1665.83   98.99
   1  -5  -1 1912.81   97.79
   1  -5  -1 1655.23   96.99
  -1  -5   1 1646.44   98.19
  -1  -5   1 1718.53   97.59
   1  -5  -1 1819.72   99.59
  -1  -5   1 1653.73  100.19
  -1  -5   1 1726.33   97.49
   1  -5  -1 1700.73   99.59
   1   5  -1 2040.60   99.49
   1   5  -1 1600.04   99.99
  -1   5   1 1502.75   97.99
   1   5  -1 1918.31   98.19
  -1   5   1 1572.04   96.39
  -1   5   1 1701.13   96.89
  -1   5   1 1907.31   98.59
   0  -5  -1  829.12   50.39
   0  -5  -1  826.22   52.89
   0  -5  -1  816.32   50.39
   0  -5   1  809.52   52.79
   0  -5  -1  867.11   51.29
   0  -5   1  796.82   51.99
   0  -5  -1  821.22   52.79
   0  -5   1  942.61   51.79
   0  -5   1  927.91   49.50
   0   5  -1  889.71   49.10
   0   5   1  891.31   51.99
   0   5   1  840.42   50.49
   0   5  -1  792.12   50.79
   0   5   1  925.31   51.39
   0   5   1  785.62   52.09
   0   5  -1  804.02   52.49
  -1  -5  -1  174.08   13.30
  -1  -5  -1  185.58   16.60
   1  -5   1  181.08   16.60
   1  -5   1  188.58   12.50
   1  -5   1  191.68   15.30
  -1  -5  -1  158.98   14.50
   1  -5   1  187.28   16.40
  -1  -5  -1  183.08   16.40
  -1   5  -1  183.58   15.80
  -1   5  -1  205.98   15.70
   1   5   1  193.78   16.50
   1   5   1  180.28   16.20
   1   5   1  187.48   16.20
  -1   5  -1  171.88   12.10
   2  -5   1  155.08   18.30
   2  -5   1  177.58   11.30
  -2  -5  -1  139.79   16.00
   2  -5   1  154.88   14.30
   2  -5   1  154.28   14.10
  -2  -5  -1  153.88    9.90
   2  -5   1  158.88   13.60
   2   5   1  156.98   15.90
   2   5   1  139.39   16.00
  -2   5  -1  150.58   15.30
   2   5   1  146.99   15.70
   2   5   1  151.28   14.70
   3  -5   1  116.39   12.90
   3  -5   1   99.09   11.90
   3  -5   1  130.89   12.00
   3  -5   1  132.79   10.10
  -3  -5  -1  117.19   15.60
   3  -5   1  149.88   18.20
   3   5   1  140.69   14.90
  -3   5  -1  127.09   11.90
   3   5   1  122.69   14.30
   3   5   1  116.99   14.90
   3   5   1  132.89   16.90
   4  -5   1  873.61   60.59
   4  -5   1  899.41   54.39
   4  -5   1  969.10   53.49
   4  -5   1  925.31   53.19
  -4  -5  -1  893.21   56.79
   4   5   1  861.91   55.89
  -4   5  -1  946.61   52.79
   4   5   1  867.31   56.69
   4   5   1  910.81   57.59
   4   5   1  887.21   59.59
   5  -5   1   58.49    6.20
   5  -5   1   55.59    8.90
  -5  -5  -1   45.10    9.60
   5  -5   1   64.69   13.60
   5   5   1   58.69   12.80
   5   5   1   41.40    9.00
   5   5   1   33.50    9.00
   6  -5   1  359.46   27.10
   6  -5   1  312.07   24.00
   6  -5   1  282.07   31.60
   6   5   1  333.47   32.60
   6   5   1  336.27   27.30
   6   5   1  329.67   26.40
   7  -5   1   83.69   17.10
   7  -5   1   75.49   10.80
   7   5   1   54.59    9.80
   7   5   1   70.29   15.50
   7   5   1   72.79   13.00
   7  -6  -1   69.69   16.20
   7   6  -1   74.19   14.30
   7   6  -1   60.19   12.60
   7   6  -1   63.59   16.60
   6  -6  -1   40.00    7.50
   6  -6  -1   30.60    4.70
   6  -6  -1   38.30   10.60
   6   6  -1   29.70   10.90
   6   6  -1   40.70   10.60
   6   6  -1   36.30   10.10
  -5  -6   1  475.05   37.90
   5  -6  -1  480.85   39.60
   5  -6  -1  540.95   32.70
   5  -6  -1  539.25   33.90
   5   6  -1  533.25   38.30
   5   6  -1  490.05   40.40
   5   6  -1  532.85   38.90
  -4  -6   1  674.93   45.10
   4  -6  -1  619.24   39.50
   4  -6  -1  608.14   44.70
   4  -6  -1  665.63   40.20
   4  -6  -1  610.64   39.10
   4   6  -1  629.34   44.00
   4   6  -1  598.14   44.30
   4   6  -1  599.24   42.20
  -4   6   1  603.54   38.40
   3  -6  -1 1716.13   98.99
   3  -6  -1 1764.92   96.59
  -3  -6   1 1702.43   92.09
  -3  -6   1 1909.51  102.99
   3  -6  -1 1671.43   96.59
  -3  -6   1 1810.92   91.69
   3  -6  -1 1673.03   97.79
   3  -6  -1 1662.63  101.69
   3   6  -1 1628.04   99.89
   3   6  -1 1714.43  101.59
   3   6  -1 1571.54   98.79
  -3   6   1 1605.34   96.89
  -2  -6   1  629.24   45.70
  -2  -6   1  681.93   40.60
   2  -6  -1  684.43   42.20
   2  -6  -1  704.03   45.20
   2  -6  -1  604.74   44.90
   2  -6  -1  654.73   41.70
  -2  -6   1  619.24   43.40
   2  -6  -1  662.43   43.90
   2   6  -1  638.94   45.70
   2   6  -1  815.62   45.40
  -2   6   1  795.62   44.80
   2   6  -1  678.73   44.20
   1  -6  -1  302.07   23.60
   1  -6  -1  324.17   23.60
   1  -6  -1  320.77   25.70
  -1  -6   1  316.17   24.80
  -1  -6   1  316.97   26.50
  -1  -6   1  323.07   23.80
   1  -6  -1  363.16   26.20
   1  -6  -1  355.06   27.20
  -1  -6   1  356.06   24.40
  -1   6   1  358.06   24.80
  -1   6   1  368.16   25.80
   1   6  -1  310.27   23.20
   1   6  -1  371.56   25.70
  -1   6   1  321.47   22.90
   1   6  -1  346.37   26.90
   0  -6   1  131.89   16.60
   0  -6   1  162.18   15.30
   0  -6   1  134.39   12.10
   0  -6  -1  153.58   14.30
   0  -6  -1  153.98   15.10
   0  -6  -1  151.68   13.90
   0  -6   1  160.48   16.00
   0  -6  -1  155.18   17.50
   0   6   1  159.08   14.60
   0   6  -1  157.88   14.80
   0   6   1  138.59   13.60
   0   6  -1  134.29   11.50
   0   6  -1  123.39   15.50
   0   6   1  146.49   16.80
   1  -6   1  369.46   27.80
   1  -6   1  334.67   24.60
  -1  -6  -1  345.57   22.70
  -1  -6  -1  313.37   27.10
   1  -6   1  349.07   21.80
   1  -6   1  325.87   26.30
   1  -6   1  324.87   26.00
  -1  -6  -1  379.86   25.30
  -1   6  -1  346.87   24.50
   1   6   1  354.16   26.10
  -1   6  -1  349.07   21.30
   1   6   1  331.47   27.00
   1   6   1  300.57   25.00
  -1   6  -1  328.27   26.20
   2  -6   1  648.04   46.20
   2  -6   1  762.62   49.80
   2  -6   1  746.63   46.10
   2  -6   1  771.12   47.20
  -2  -6  -1  674.73   48.40
  -2  -6  -1  701.73   41.20
   2  -6   1  732.93   42.10
   2   6   1  677.13   46.20
   2   6   1  784.22   48.70
  -2   6  -1  707.93   46.70
   2   6   1  909.31   50.49
   3  -6   1  453.15   30.60
   3  -6   1  446.16   30.40
  -3  -6  -1  418.96   33.60
   3  -6   1  446.16   31.10
   3  -6   1  440.86   36.00
   3   6   1  454.05   34.80
   3   6   1  462.25   32.90
  -3   6  -1  440.26   30.40
   3   6   1  440.96   33.20
   4  -6   1   59.09    9.70
   4  -6   1   53.99    8.80
  -4  -6  -1   65.29   11.80
   4  -6   1   64.19   12.80
   4   6   1   70.29   12.20
   4   6   1   52.89   11.00
   4   6   1   54.39   12.70
  -5  -6  -1  495.95   38.40
   5  -6   1  560.14   42.10
   5  -6   1  534.85   34.50
   5   6   1  494.05   36.90
   5   6   1  507.65   41.50
   5   6   1  458.85   36.80
   6  -6   1   72.09   14.70
   6  -6   1   59.99    9.40
   6   6   1   29.40   12.80
   6   6   1   49.10    9.80
   6   6   1   65.29   12.60
   7  -6   1   -1.70    9.40
   7   6   1    4.80    6.10
   7   6   1   28.20    8.10
   6  -7  -1  331.37   22.80
   6  -7  -1  428.56   35.70
   6   7  -1  344.87   33.50
   6   7  -1  364.16   31.40
   6   7  -1  313.77   29.70
   5  -7  -1   45.70    8.30
   5  -7  -1   43.20   12.50
  -5  -7   1   44.40   11.60
   5  -7  -1   49.50    8.20
   5   7  -1   55.19   12.30
   5   7  -1   50.39   12.30
   5   7  -1   66.39   12.90
   4  -7  -1  105.19   12.40
  -4  -7   1   50.69   12.00
   4  -7  -1   87.99   11.90
   4  -7  -1  110.09   16.70
   4   7  -1   95.39   15.70
   4   7  -1   79.39   13.40
   4   7  -1   64.89   13.60
   3  -7  -1   -0.50    3.80
  -3  -7   1   -1.80    5.70
   3  -7  -1   -3.80    4.90
   3  -7  -1    7.00    7.40
   3   7  -1    0.10    4.70
   3   7  -1   -0.80    4.60
  -3   7   1   -0.60    3.90
   3   7  -1   -4.00    3.40
   2  -7  -1  139.09   17.20
   2  -7  -1  170.18   15.50
   2  -7  -1  163.98   14.70
  -2  -7   1  145.79   16.80
   2  -7  -1  143.29   18.40
  -2  -7   1  175.98   13.60
  -2  -7   1  152.98   19.80
   2   7  -1  176.28   18.70
   2   7  -1  140.49   15.00
   2   7  -1  115.99   18.20
  -2   7   1  159.08   17.50
  -1  -7   1  285.77   23.60
   1  -7  -1  334.67   25.40
  -1  -7   1  290.17   25.60
  -1  -7   1  276.87   22.10
  -1  -7   1  310.67   22.90
   1  -7  -1  278.47   22.60
   1  -7  -1  311.07   25.60
   1  -7  -1  294.97   22.30
   1   7  -1  282.67   23.80
   1   7  -1  303.77   22.30
   1   7  -1  280.57   25.20
  -1   7   1  279.97   21.30
  -1   7   1  303.17   25.30
   0  -7   1  360.06   24.90
   0  -7   1  349.87   28.00
   0  -7   1  410.56   30.90
   0  -7   1  358.06   26.90
   0  -7  -1  391.96   29.80
   0  -7  -1  381.86   26.80
   0  -7  -1  384.26   27.20
   0   7  -1  356.16   29.50
   0   7  -1  352.76   24.40
   0   7   1  343.87   27.90
   0   7   1  384.96   29.60
   0   7   1  336.17   25.80
   0   7  -1  368.06   27.90
   1  -7   1  286.57   25.80
   1  -7   1  312.67   20.80
  -1  -7  -1  293.97   23.70
   1  -7   1  306.97   24.30
  -1  -7  -1  307.67   21.70
   1  -7   1  337.17   27.40
  -1  -7  -1  289.97   26.70
  -1   7  -1  312.17   26.00
  -1   7  -1  308.37   20.10
   1   7   1  321.07   26.90
   1   7   1  272.57   24.20
   1   7   1  344.47   25.60
  -2  -7  -1  734.03   42.40
   2  -7   1  707.33   48.00
   2  -7   1  666.83   47.90
   2  -7   1  710.33   51.09
   2  -7   1  723.63   47.10
  -2  -7  -1  836.92   52.09
   2   7   1  739.93   49.30
   2   7   1  710.93   48.70
   2   7   1  778.12   50.89
  -2   7  -1  765.32   48.60
   3  -7   1  558.04   43.50
  -3  -7  -1  558.04   41.50
   3  -7   1  616.94   40.00
   3  -7   1  603.74   39.20
  -3   7  -1  621.34   39.50
   3   7   1  575.74   41.20
   3   7   1  508.85   41.30
   3   7   1  580.74   42.20
   4  -7   1   88.69   16.80
   4  -7   1   93.19   12.30
   4  -7   1   87.59   11.70
  -4  -7  -1  100.89   15.40
   4   7   1   82.39   16.00
   4   7   1   90.19   15.10
   4   7   1   78.39   13.50
   5  -7   1  137.39   21.50
   5  -7   1  104.79   13.80
   5  -7   1   99.59   12.00
   5   7   1  111.39   16.80
   5   7   1  145.69   22.10
   5   7   1  118.19   17.00
   6  -7   1   31.20    8.50
   6  -7   1   38.60   13.70
   6   7   1   40.00   10.90
   6   7   1   46.80   12.70
   6   7   1   36.80   11.30
   6  -8  -1  115.89   12.00
   6   8  -1   92.79   17.60
   5  -8  -1  279.17   23.00
   5  -8  -1  313.47   32.50
   5  -8  -1  231.08   20.40
  -5  -8   1  268.27   32.60
   5   8  -1  248.88   28.30
   5   8  -1  241.28   27.10
   5   8  -1  263.17   27.60
   4  -8  -1   24.80   11.40
   4  -8  -1   22.20    7.20
  -4  -8   1   30.80   11.50
   4  -8  -1   26.90    7.30
   4   8  -1   16.80    6.70
   4   8  -1   15.30    9.20
   4   8  -1   19.50    8.40
   3  -8  -1    0.40    4.90
   3  -8  -1   -2.30    5.60
   3  -8  -1   -9.80    4.00
  -3  -8   1    2.40    7.10
  -3   8   1   -3.00    4.50
   3   8  -1    6.30    6.50
   3   8  -1   -5.10    4.80
   3   8  -1   -2.70    6.90
   2  -8  -1   55.89   11.60
  -2  -8   1   54.69   11.00
   2  -8  -1   50.79   11.20
   2  -8  -1   67.09   11.30
  -2  -8   1   59.09   14.30
  -2  -8   1   61.09    8.90
   2   8  -1   60.59   11.10
   2   8  -1   73.09   13.00
   2   8  -1   74.89   14.50
  -2   8   1   58.69   11.40
  -1  -8   1   22.00    8.80
   1  -8  -1   15.20    6.20
   1  -8  -1    6.60    7.30
  -1  -8   1   19.70    6.50
  -1  -8   1   17.30    6.30
   1  -8  -1   14.70    5.60
  -1   8   1   17.40    8.20
   1   8  -1   14.80    8.40
   1   8  -1   22.50    7.40
   1   8  -1   11.80    6.70
  -1   8   1   12.00    5.30
   0  -8  -1   92.79   13.40
   0  -8   1  102.59   13.90
   0  -8  -1  100.69   15.20
   0  -8  -1   96.79   12.80
   0  -8   1   85.99   13.40
   0  -8   1   87.59   14.50
   0   8   1  106.89   14.60
   0   8   1   96.29   15.20
   0   8  -1   97.49   15.90
   0   8  -1   86.29    9.50
   0   8   1  122.59   14.20
   0   8  -1   82.69   12.70
  -1  -8  -1  994.50   62.39
   1  -8   1  913.61   58.19
  -1  -8  -1  941.51   57.69
   1  -8   1  900.61   60.69
  -1  -8  -1  917.51   54.99
   1  -8   1  865.31   59.79
   1   8   1  952.00   61.39
  -1   8  -1  855.01   59.59
   1   8   1  952.60   60.09
  -1   8  -1  922.41   55.19
   1   8   1  892.21   58.19
   2  -8   1   66.49   13.80
  -2  -8  -1   71.99   14.60
   2  -8   1   72.49   11.80
   2  -8   1   61.49   11.80
   2   8   1   76.79   14.00
   2   8   1   92.69   14.70
   2   8   1   56.99   12.00
  -2   8  -1   73.89   12.60
  -3  -8  -1  344.67   31.10
   3  -8   1  391.86   30.10
   3  -8   1  370.26   33.70
   3  -8   1  390.06   29.30
   3   8   1  375.66   32.30
   3   8   1  364.96   31.30
   3   8   1  366.16   31.30
  -4  -8  -1   -4.90    5.90
   4  -8   1    6.40    8.60
   4  -8   1    3.40    5.50
   4  -8   1    3.80    5.20
   4   8   1    3.60    7.10
   4   8   1    6.80    6.00
   4   8   1   10.90    7.80
   5  -8   1   21.20   11.60
   5  -8   1   15.60    6.80
   5  -8   1    5.90    5.10
   5   8   1    5.60    9.10
   5   8   1   20.70    9.60
   5   8   1   24.90   10.40
   5  -9  -1    4.00    6.30
   5   9  -1   21.30   10.90
   4  -9  -1   83.09   13.60
   4  -9  -1   94.29   17.10
   4  -9  -1   97.89   14.90
  -4  -9   1  140.89   20.10
   4   9  -1  103.59   16.50
   4   9  -1   84.69   16.10
   4   9  -1  118.69   18.80
   3  -9  -1    8.50    6.30
   3  -9  -1    7.20    5.60
  -3  -9   1    6.00    8.70
   3  -9  -1    7.30    6.70
   3   9  -1   -2.80    6.10
   3   9  -1    2.20    6.50
   3   9  -1    5.40    6.60
   2  -9  -1  366.56   30.60
  -2  -9   1  283.97   32.70
   2  -9  -1  359.56   30.80
   2  -9  -1  338.47   27.70
  -2  -9   1  316.07   28.30
   2   9  -1  420.16   29.60
   2   9  -1  323.87   29.80
   2   9  -1  365.16   32.30
  -2   9   1  326.97   28.30
  -1  -9   1   61.59   13.30
  -1  -9   1   66.49   11.40
   1  -9  -1   62.89   11.00
  -1  -9   1   48.30   11.10
   1  -9  -1   67.49   12.90
   1  -9  -1   66.09   12.60
   1   9  -1   55.99   14.00
   1   9  -1   46.90   11.40
  -1   9   1   58.49   12.90
   0  -9   1  215.08   25.30
   0  -9  -1  226.68   22.20
   0  -9   1  250.17   22.00
   0  -9  -1  236.78   20.40
   0  -9  -1  201.98   23.60
   0  -9   1  188.88   21.80
   0   9  -1  170.48   20.50
   0   9   1  194.88   18.90
   0   9   1  244.48   25.90
   0   9  -1  192.08   23.20
   0   9   1  185.28   21.50
   1  -9   1  176.38   20.00
   1  -9   1  185.48   23.60
   1  -9   1  127.49   18.90
  -1  -9  -1  161.28   21.90
  -1   9  -1  155.18   21.20
   1   9   1  149.99   20.00
   1   9   1  164.18   21.50
   1   9   1  177.48   18.10
   2  -9   1  255.57   26.30
  -2  -9  -1  303.57   30.90
   2  -9   1  208.78   25.30
   2  -9   1  237.98   22.50
   2   9   1  273.47   29.10
   2   9   1  221.68   22.60
   2   9   1  261.87   25.60
   3  -9   1   87.49   14.50
  -3  -9  -1  105.79   18.40
   3  -9   1   72.69   16.60
   3  -9   1   76.39   12.60
   3   9   1   76.09   15.00
   3   9   1   93.19   16.50
   3   9   1  100.39   16.50
   4  -9   1   30.50   10.60
   4  -9   1   32.10    9.00
  -4  -9  -1   29.20   11.60
   4  -9   1   25.10    8.70
   4   9   1   18.30   10.70
   4   9   1   21.10   11.00
   4   9   1   16.80    9.20
   3 -10  -1  730.53   50.19
   3 -10  -1  708.83   52.79
   3 -10  -1  680.63   48.00
  -3 -10   1  637.14   53.39
   3  10  -1  792.42   55.89
   3  10  -1  695.63   51.89
   2 -10  -1   89.79   15.40
   2 -10  -1   84.69   12.80
   2 -10  -1   80.89   15.50
  -2 -10   1  100.89   18.60
  -2 -10   1   55.39   11.90
   2  10  -1  114.79   19.20
   2  10  -1   81.29   15.40
   1 -10  -1   56.89   11.70
   1 -10  -1   59.89   12.90
   1 -10  -1   72.09   13.00
  -1 -10   1   55.39   12.30
  -1 -10   1   57.39   14.20
   1  10  -1   69.99   15.90
   1  10  -1   33.20   11.20
  -1  10   1   65.99   13.60
   0 -10  -1   15.00    7.10
   0 -10   1    1.80    5.70
   0 -10   1    3.70    4.90
   0 -10   1    8.10    9.50
   0 -10  -1   -3.90    6.90
   0  10  -1   17.10   10.20
   0  10   1    2.20    7.70
   0  10  -1    2.10    5.90
   0  10   1    5.40    6.40
   1 -10   1   63.29   13.70
   1 -10   1   61.69   12.60
  -1 -10  -1   50.69   13.90
   1 -10   1   52.99   13.50
  -1  10  -1   55.19   13.30
   1  10   1   62.19   13.60
   1  10   1   63.09   15.10
   2 -10   1  129.79   17.30
  -2 -10  -1  109.19   19.20
   2 -10   1   96.69   18.70
   2 -10   1   88.39   16.80
   2  10   1   72.39   14.60
   2  10   1  103.79   16.30
   2  10   1  108.49   19.00
   3 -10   1  155.18   21.00
   3 -10   1  135.79   21.50
   3 -10   1  190.78   20.90
  -3 -10  -1  162.18   23.10
   3  10   1  180.48   27.30
   3  10   1  132.39   20.30
   9   0  -2  178.58   27.40
   9   0  -2  187.38   20.40
   8   0  -2   82.69   11.80
   8   0  -2   86.59   12.00
   8   0  -2   60.89   15.80
   7   0  -2   45.30    8.20
   7   0  -2   38.50    8.50
   7   0  -2   38.00    4.70
   6   0  -2 2364.46  140.09
  -6   0   2 2622.64  136.39
   6   0  -2 2597.74  139.59
   6   0  -2 2488.25  137.09
   5   0  -2  142.69   10.90
   5   0  -2  143.59   12.80
   5   0  -2  127.99   11.60
  -5   0   2  147.49    9.30
   5   0  -2  162.58    9.40
  -5   0   2  146.99   10.50
  -4   0   2  579.44   32.00
  -4   0   2  537.75   30.90
   4   0  -2  543.35   30.90
   4   0  -2  575.74   34.20
  -4   0   2  553.14   35.30
   4   0  -2  567.54   32.20
   4   0  -2  554.64   33.10
  -3   0   2  506.15   31.80
   3   0  -2  536.15   31.30
   3   0  -2  537.35   29.00
   3   0  -2  520.15   30.20
  -3   0   2  498.35   28.90
  -3   0   2  541.35   29.50
   3   0  -2  510.95   29.60
  -2   0   2  640.14   33.00
  -2   0   2  622.94   33.10
   2   0  -2  540.75   33.80
   2   0  -2  637.44   33.20
   2   0  -2  614.64   32.90
   2   0  -2  577.24   32.90
  -2   0   2  536.85   34.20
  -1   0   2   10.00    1.60
  -1   0   2    6.70    1.40
   1   0  -2    6.80    2.10
   1   0  -2    9.50    1.60
  -1   0   2    6.60    1.50
   1   0  -2    9.90    1.20
  -1   0   2   10.30    2.30
   1   0  -2    8.50    1.50
   0   0   2 1629.54   85.59
   0   0   2 1507.35   85.99
   0   0   2 1595.14   85.09
   0   0  -2 1511.15   85.49
   0   0  -2 1533.35   84.99
   0   0   2 1534.65   84.99
   0   0  -2 1704.73   84.99
   0   0   2 1562.14   84.99
   0   0  -2 1611.24   85.09
   0   0  -2 1671.63   86.29
  -1   0  -2  373.66   20.70
   1   0   2  364.96   20.90
   1   0   2  361.46   23.00
   1   0   2  397.56   21.30
   1   0   2  375.36   21.00
  -1   0  -2  377.96   21.20
  -1   0  -2  393.86   21.00
  -1   0  -2  374.06   23.10
   2   0   2    0.80    0.70
  -2   0  -2    0.20    1.20
  -2   0  -2    0.20    2.80
   2   0   2    3.30    2.80
   2   0   2    1.70    1.20
  -2   0  -2   -0.20    0.30
   2   0   2    1.40    1.30
  -3   0  -2 1135.29   59.09
   3   0   2 1149.08   59.29
   3   0   2 1002.70   59.79
   3   0   2 1062.49   63.89
   3   0   2 1070.39   58.09
  -3   0  -2 1068.59   58.09
   4   0   2  123.79    9.80
   4   0   2  109.79   14.30
   4   0   2  124.19    7.50
   4   0   2  118.59    6.90
   5   0   2  136.69   11.60
   5   0   2  136.79   15.60
   5   0   2  125.89   17.00
   6   0   2   44.70   10.50
   6   0   2   42.40    7.10
   6   0   2   32.00    8.10
   7   0   2   14.20    4.30
   7   0   2   19.60    5.90
   7   0   2   20.30    8.90
   7   0   2   10.60    6.50
   8   0   2  342.17   34.30
   8   0   2  339.07   26.80
   8   0   2  393.86   25.60
   9  -1  -2  310.97   36.00
   9  -1  -2  333.57   25.10
   9   1  -2  259.57   25.00
   9   1  -2  298.67   36.90
   8  -1  -2  186.08   13.60
   8  -1  -2  210.28   26.40
   8  -1  -2  154.28   18.50
   8  -1  -2  192.08   16.60
   8   1  -2  138.69   23.10
   8   1  -2  131.49   16.60
   7  -1  -2  175.68   16.30
   7  -1  -2  130.39   12.50
   7  -1  -2  134.99   10.60
   7   1  -2  143.29   11.90
   7   1  -2  159.08   13.40
   7   1  -2  133.09   20.30
   7   1  -2  130.89   15.00
   6  -1  -2  431.66   30.80
   6  -1  -2  436.96   24.80
   6  -1  -2  445.86   28.40
   6  -1  -2  415.26   25.20
   6  -1  -2  429.26   25.70
  -6   1   2  443.26   24.40
   6   1  -2  440.46   24.90
   6   1  -2  462.35   29.50
  -6   1   2  430.96   24.50
   6   1  -2  437.26   27.70
   6   1  -2  411.06   28.10
   5  -1  -2 2216.68  117.39
   5  -1  -2 2101.99  117.69
  -5  -1   2 2199.78  119.49
   5  -1  -2 2175.08  122.99
   5  -1  -2 2145.49  119.79
  -5   1   2 2128.39  117.39
   5   1  -2 2383.76  120.99
   5   1  -2 2052.39  119.89
   5   1  -2 2278.67  117.59
   5   1  -2 2138.49  119.79
   5   1  -2 2148.09  119.89
  -4  -1   2  199.98   11.10
  -4  -1   2  187.28   13.20
   4  -1  -2  159.78   10.30
   4  -1  -2  169.18   14.10
   4  -1  -2  169.78   10.50
  -4  -1   2  156.58   11.90
   4   1  -2  154.68   12.20
   4   1  -2  154.98   10.70
   4   1  -2  146.89   12.10
   4   1  -2  167.58   11.80
   4   1  -2  151.68   12.10
  -4   1   2  162.28   10.50
  -4   1   2  155.48   14.90
   3  -1  -2 1977.40  110.49
   3  -1  -2 1942.31  113.69
   3  -1  -2 2054.59  110.79
  -3  -1   2 2000.70  111.29
  -3  -1   2 1984.70  111.59
  -3  -1   2 2013.60  112.19
  -3  -1   2 1992.60  112.09
   3   1  -2 2126.29  112.29
   3   1  -2 2009.70  112.39
  -3   1   2 2005.80  110.39
  -3   1   2 2300.37  111.09
   3   1  -2 2073.09  111.29
  -3   1   2 1958.70  114.29
   3   1  -2 2110.29  111.49
   3   1  -2 2330.47  112.49
  -2  -1   2  215.18   13.80
  -2  -1   2  208.48   13.80
  -2  -1   2  205.68   14.00
   2  -1  -2  222.88   12.40
   2  -1  -2  215.18   15.40
  -2  -1   2  198.68   14.20
   2  -1  -2  220.68   13.60
  -2  -1   2  217.78   14.20
   2  -1  -2  228.08   13.30
   2   1  -2  231.38   14.40
  -2   1   2  229.38   13.30
   2   1  -2  253.67   14.10
   2   1  -2  273.27   14.50
  -2   1   2  236.08   16.10
   2   1  -2  246.18   13.80
   2   1  -2  250.07   15.00
  -2   1   2  221.88   13.70
  -1  -1   2  211.08   12.80
   1  -1  -2  219.98   13.50
  -1  -1   2  228.28   13.10
   1  -1  -2  265.67   15.10
   1  -1  -2  213.78   13.20
  -1  -1   2  205.08   13.40
   1  -1  -2  221.88   14.20
  -1  -1   2  206.38   13.40
  -1  -1   2  208.38   13.60
  -1   1   2  208.58   13.40
  -1   1   2  242.68   14.60
  -1   1   2  223.98   12.20
  -1   1   2  203.68   14.30
  -1   1   2  210.78   13.10
   1   1  -2  225.38   13.20
   1   1  -2  218.08   13.00
   1   1  -2  212.88   13.50
   1   1  -2  215.28   13.90
   1   1  -2  218.18   13.40
   0  -1   2 1979.70  116.19
   0  -1  -2 2084.69  118.39
   0  -1  -2 2098.99  116.99
   0  -1  -2 2119.49  117.39
   0  -1   2 2121.79  116.89
   0  -1   2 2116.19  117.19
   0  -1  -2 2058.99  117.29
   0  -1   2 2240.38  117.09
   0  -1   2 2239.78  116.69
   0  -1  -2 2207.58  117.29
   0   1   2 2298.97  117.69
   0   1   2 2316.37  117.29
   0   1  -2 2350.86  116.89
   0   1   2 2086.09  117.19
   0   1   2 2358.16  117.19
   0   1  -2 2122.99  116.89
   0   1  -2 2370.06  117.09
   0   1   2 2085.19  118.39
   0   1  -2 2145.19  116.59
   0   1  -2 2172.88  117.29
  -1  -1  -2 4039.80  220.28
  -1  -1  -2 4015.70  222.08
  -1  -1  -2 4667.63  219.88
  -1  -1  -2 4188.88  219.98
   1  -1   2 3934.31  219.78
   1  -1   2 4138.99  220.18
   1  -1   2 4440.26  220.18
   1  -1   2 3530.95  219.48
   1   1   2 4083.49  219.88
   1   1   2 3934.41  221.98
  -1   1  -2 4128.89  218.78
  -1   1  -2 4039.70  219.98
  -1   1  -2 4252.77  219.38
  -1   1  -2 4182.88  219.38
   1   1   2 4343.57  219.98
   1   1   2 3643.14  219.18
   1   1   2 4292.97  220.48
  -2  -1  -2  242.88   14.10
  -2  -1  -2  233.38   17.50
   2  -1   2  222.48   12.60
   2  -1   2  220.78   15.50
   2  -1   2  218.58   13.00
  -2  -1  -2  210.28   13.80
  -2  -1  -2  204.68   14.40
   2  -1   2  206.78   13.90
   2   1   2  215.08   14.30
  -2   1  -2  243.18   13.30
  -2   1  -2  230.68   12.60
   2   1   2  213.78   16.80
   2   1   2  225.68   14.90
   2   1   2  237.58   14.10
   3  -1   2  916.01   56.49
  -3  -1  -2  955.10   53.99
   3  -1   2  884.11   52.89
  -3  -1  -2  983.30   53.09
  -3  -1  -2 1027.40   53.59
   3  -1   2  966.60   51.59
  -3  -1  -2  905.71   57.89
   3  -1   2  936.71   51.59
   3  -1   2 1024.30   53.79
   3   1   2 1057.89   54.69
   3   1   2  927.61   53.09
   3   1   2  913.51   58.19
   3   1   2  975.80   54.29
   4  -1   2  252.67   15.90
   4  -1   2  241.38   16.00
  -4  -1  -2  234.48   14.60
  -4  -1  -2  252.87   15.70
   4  -1   2  233.78   19.70
   4   1   2  233.48   14.80
   4   1   2  255.57   15.60
   4   1   2  228.68   20.80
   4   1   2  230.18   16.80
  -5  -1  -2  420.76   23.40
   5  -1   2  440.06   31.20
  -5  -1  -2  416.76   22.60
   5  -1   2  425.76   25.50
   5  -1   2  395.96   25.40
   5  -1   2  393.16   30.30
   5   1   2  394.96   23.00
   5   1   2  385.36   31.60
   5   1   2  396.36   23.60
   5   1   2  369.06   27.30
   5   1   2  387.86   26.40
   6  -1   2    7.70    3.80
   6  -1   2   10.30    6.90
   6  -1   2    9.90    3.90
   6  -1   2    7.80    5.60
   6   1   2   14.30    6.00
   6   1   2   11.90    1.90
   6   1   2   15.50    1.60
   6   1   2   25.90    6.20
   6   1   2   14.50    8.60
   7  -1   2  241.38   25.30
   7  -1   2  254.87   23.50
   7  -1   2  258.87   18.70
   7  -1   2  226.18   19.20
   7   1   2  250.77   20.30
   7   1   2  247.38   29.10
   8  -1   2  137.19   15.60
   8  -1   2  138.59   14.40
   8  -1   2  208.08   26.70
   8   1   2  149.99   23.80
   8   1   2  147.29   17.00
   8  -2  -2  328.87   27.70
   8  -2  -2  332.07   24.50
   8   2  -2  324.57   26.50
   8   2  -2  325.17   34.10
   8   2  -2  333.17   22.90
   7  -2  -2   23.60    6.10
   7  -2  -2   39.80    5.70
   7  -2  -2   30.70    8.40
   7   2  -2   17.50    9.00
   7   2  -2   28.30    6.30
   7   2  -2   36.40    8.00
   6  -2  -2    5.40    2.50
   6  -2  -2    8.10    2.30
   6  -2  -2   11.00    2.30
   6  -2  -2    3.70    5.60
   6   2  -2   19.70    5.90
   6   2  -2    3.60    6.80
   6   2  -2    7.30    2.50
   6   2  -2    7.10    2.90
  -6   2   2    9.90    1.60
   6   2  -2    9.90    4.50
   5  -2  -2  356.56   20.10
   5  -2  -2  325.77   21.00
   5  -2  -2  372.36   26.80
  -5  -2   2  340.77   23.30
   5  -2  -2  376.46   21.00
   5   2  -2  343.37   24.00
   5   2  -2  369.06   21.80
   5   2  -2  298.67   23.40
  -5   2   2  357.96   19.90
  -5   2   2  354.16   21.10
   5   2  -2  328.67   28.50
   5   2  -2  335.97   21.00
   4  -2  -2   94.49   11.70
  -4  -2   2  118.69    9.00
   4  -2  -2  101.29    7.30
  -4  -2   2  107.89    9.90
   4  -2  -2   98.79    7.00
   4  -2  -2  110.69    8.20
  -4  -2   2  125.69   10.20
   4   2  -2   78.69    8.30
  -4   2   2   95.49    8.00
   4   2  -2  106.99   10.70
   4   2  -2  104.19    7.40
   4   2  -2   99.59   10.70
   4   2  -2  128.39   10.40
  -3  -2   2   70.29    6.30
   3  -2  -2   72.79    6.40
   3  -2  -2   65.39    4.90
  -3  -2   2   77.49    8.10
  -3  -2   2   67.69    7.40
   3  -2  -2   62.39    8.90
   3  -2  -2   62.69    5.20
  -3  -2   2   72.59    5.70
   3   2  -2   64.79    7.40
   3   2  -2   49.90    4.70
   3   2  -2   63.39    7.50
   3   2  -2   69.49    7.10
  -3   2   2   63.79    5.00
   3   2  -2   68.29    8.20
  -3   2   2   61.69    6.50
  -3   2   2   79.39   10.60
  -2  -2   2 5636.54  301.07
  -2  -2   2 5333.87  301.57
   2  -2  -2 5541.95  301.37
  -2  -2   2 5567.44  301.97
  -2  -2   2 5490.15  302.27
   2  -2  -2 5497.65  302.57
   2  -2  -2 5434.76  303.17
  -2  -2   2 5510.45  300.97
   2  -2  -2 5657.73  300.87
   2  -2  -2 4865.51  299.67
  -2   2   2 5495.85  300.57
  -2   2   2 5431.96  301.37
   2   2  -2 5562.54  301.67
   2   2  -2 6315.97  303.17
   2   2  -2 6279.87  301.47
  -2   2   2 5648.94  303.57
   2   2  -2 6416.26  302.27
  -2   2   2 5427.66  300.57
   2   2  -2 5918.51  301.87
   1  -2  -2  924.61   49.90
   1  -2  -2  839.62   47.80
   1  -2  -2  805.32   49.10
  -1  -2   2  891.41   48.30
  -1  -2   2  947.11   49.90
   1  -2  -2  956.60   50.09
  -1  -2   2  848.72   48.50
  -1  -2   2  824.22   49.30
   1  -2  -2  830.22   49.30
  -1  -2   2  847.22   49.60
   1  -2  -2  836.32   49.10
   1   2  -2  918.41   49.50
   1   2  -2  838.72   48.90
  -1   2   2  835.52   49.80
  -1   2   2  887.91   49.80
   1   2  -2  910.01   50.19
  -1   2   2  921.81   49.20
  -1   2   2  900.71   48.10
  -1   2   2  823.92   49.90
   1   2  -2  924.81   49.30
   0  -2  -2 1036.80   58.49
   0  -2  -2 1042.20   59.59
   0  -2  -2 1014.50   57.79
   0  -2   2 1056.59   58.59
   0  -2  -2 1091.79   59.39
   0  -2   2 1012.50   58.39
   0  -2   2 1105.19   58.49
   0  -2  -2 1060.09   58.99
   0   2  -2 1056.09   58.19
   0   2  -2 1130.39   59.19
   0   2   2 1016.40   58.09
   0   2   2 1026.30   58.59
   0   2   2 1049.59   59.29
   0   2   2 1020.20   58.79
   0   2  -2 1008.40   57.79
   0   2  -2 1099.69   58.19
   0   2   2 1044.50   57.79
   0   2   2 1044.40   59.69
   1  -2   2  218.78   14.00
   1  -2   2  213.88   12.30
  -1  -2  -2  208.48   12.60
  -1  -2  -2  241.98   15.50
   1  -2   2  204.98   13.50
   1  -2   2  194.38   13.20
  -1  -2  -2  203.68   14.00
  -1  -2  -2  199.68   14.30
   1  -2   2  208.68   13.70
  -1  -2  -2  214.98   16.00
   1   2   2  218.38   14.40
  -1   2  -2  208.38   13.40
   1   2   2  195.38   15.60
  -1   2  -2  219.08   13.30
   1   2   2  225.48   15.30
   1   2   2  208.18   12.70
   1   2   2  209.68   14.70
  -1   2  -2  221.78   14.10
   2  -2   2  122.79    7.80
  -2  -2  -2   94.79    9.30
   2  -2   2  103.39    8.80
  -2  -2  -2  111.79    9.10
   2  -2   2  111.59    8.20
   2  -2   2  119.29    9.00
  -2  -2  -2  112.89   13.00
  -2  -2  -2  120.19   10.30
  -2   2  -2  119.39    7.40
   2   2   2  110.69    9.50
   2   2   2  119.59   12.10
  -2   2  -2  122.99    8.40
   2   2   2  113.39    7.40
   2   2   2  136.89   10.80
   2   2   2  103.59    9.50
   3  -2   2  285.47   18.40
  -3  -2  -2  286.07   18.80
  -3  -2  -2  288.27   18.30
   3  -2   2  288.87   15.80
   3  -2   2  263.47   19.80
  -3  -2  -2  279.37   19.30
   3   2   2  270.27   19.10
   3   2   2  307.27   23.40
  -3   2  -2  289.17   16.60
   3   2   2  300.67   19.00
  -3   2  -2  284.77   15.60
   3   2   2  266.87   16.60
   3   2   2  272.27   19.70
   4  -2   2 1082.79   63.29
   4  -2   2 1068.99   66.49
  -4  -2  -2 1073.79   63.09
   4   2   2 1105.39   63.29
   4   2   2 1048.20   68.99
   4   2   2 1164.38   63.59
   4   2   2 1237.48   65.19
   4   2   2 1164.98   61.79
   5  -2   2   55.99    6.80
   5  -2   2   58.29   10.00
   5  -2   2   61.09    7.50
   5  -2   2   73.79   12.30
   5   2   2   35.80   10.80
   5   2   2   35.10    5.60
   5   2   2   51.09    7.00
   5   2   2   51.99    8.00
   5   2   2   44.20    6.30
   6  -2   2  299.77   20.20
   6  -2   2  261.17   25.70
   6  -2   2  276.97   19.60
   6  -2   2  288.67   25.20
   6   2   2  273.37   21.70
   6   2   2  271.87   17.50
   6   2   2  253.67   26.20
   7  -2   2   46.60    7.60
   7  -2   2   36.80   10.90
   7  -2   2   44.40    7.30
   7  -2   2   68.29   13.00
   7   2   2   24.40   11.30
   7   2   2   42.20    8.90
   8  -2   2   29.20    6.50
   8  -2   2   41.10    8.20
   8  -2   2   30.60    9.50
   8  -2   2   25.10    9.00
   8   2   2    8.60   10.30
   8   2   2   15.90    7.70
   8  -3  -2   73.49   14.40
   8  -3  -2   88.49   11.20
   8   3  -2   84.19   18.00
   8   3  -2   66.69   10.40
   8   3  -2   81.99   13.60
   7  -3  -2  269.27   17.70
   7  -3  -2  223.08   25.30
   7   3  -2  258.87   22.40
   7   3  -2  256.27   21.10
   7   3  -2  241.38   26.20
  -6  -3   2  172.48   16.40
   6  -3  -2  177.38   11.20
   6  -3  -2  175.58   13.00
   6  -3  -2  185.38   12.80
   6  -3  -2  222.98   20.60
   6   3  -2  210.38   17.60
   6   3  -2  190.38   24.30
   6   3  -2  177.98   18.00
   6   3  -2  181.38   11.50
   5  -3  -2  210.98   14.50
   5  -3  -2  210.78   15.20
   5  -3  -2  257.17   21.60
   5  -3  -2  226.38   13.40
   5   3  -2  205.58   17.80
   5   3  -2  221.78   13.20
   5   3  -2  197.68   15.90
   5   3  -2  245.98   19.20
   5   3  -2  234.18   22.40
  -5   3   2  214.98   13.10
   4  -3  -2  150.28   16.50
  -4  -3   2  155.08   13.80
  -4  -3   2  148.49   10.40
   4  -3  -2  149.88   10.70
   4  -3  -2  164.08   10.50
   4  -3  -2  147.59   12.10
   4   3  -2  160.68   16.90
   4   3  -2  161.68   14.20
   4   3  -2  159.78   13.60
  -4   3   2  152.28   12.00
   4   3  -2  174.88   13.10
   4   3  -2  157.18    9.60
  -4   3   2  164.08   10.30
   3  -3  -2 1187.68   74.79
   3  -3  -2 1452.55   72.89
  -3  -3   2 1382.36   74.09
   3  -3  -2 1303.37   70.69
  -3  -3   2 1295.87   69.79
   3  -3  -2 1361.76   73.89
   3  -3  -2 1273.17   71.19
  -3  -3   2 1247.88   72.09
  -3  -3   2 1316.57   72.89
  -3  -3   2 1299.57   73.39
   3   3  -2 1216.38   74.29
  -3   3   2 1190.68   69.49
   3   3  -2 1238.68   72.59
   3   3  -2 1375.06   73.59
  -3   3   2 1329.37   72.79
   3   3  -2 1330.47   76.09
  -3   3   2 1242.38   75.89
  -3   3   2 1238.98   70.79
   3   3  -2 1183.48   72.69
  -2  -3   2  309.77   21.60
   2  -3  -2  322.97   22.10
   2  -3  -2  281.87   20.50
  -2  -3   2  339.47   21.80
   2  -3  -2  309.37   18.90
  -2  -3   2  272.07   20.60
  -2  -3   2  321.37   18.30
   2  -3  -2  339.67   21.30
   2  -3  -2  294.97   20.10
  -2  -3   2  319.07   20.20
  -2   3   2  344.97   18.80
   2   3  -2  311.67   22.40
  -2   3   2  334.77   21.40
  -2   3   2  313.17   19.80
   2   3  -2  286.07   21.40
   2   3  -2  335.47   21.40
   2   3  -2  281.17   20.60
   2   3  -2  344.97   21.50
  -2   3   2  314.17   23.00
   1  -3  -2  372.56   24.20
  -1  -3   2  421.86   24.50
  -1  -3   2  318.87   22.80
  -1  -3   2  353.56   23.80
   1  -3  -2  350.86   23.30
   1  -3  -2  358.86   23.40
   1  -3  -2  371.06   23.80
  -1  -3   2  354.86   22.40
   1  -3  -2  361.56   21.90
   1  -3  -2  353.56   23.40
  -1   3   2  378.46   23.40
  -1   3   2  342.47   23.20
  -1   3   2  367.16   24.20
   1   3  -2  360.46   23.20
   1   3  -2  358.76   23.00
   1   3  -2  386.86   23.80
   1   3  -2  358.16   22.70
  -1   3   2  372.76   22.10
  -1   3   2  391.16   24.40
   1   3  -2  389.96   24.90
   0  -3   2  455.15   29.80
   0  -3   2  509.35   30.30
   0  -3  -2  444.16   29.60
   0  -3   2  551.44   29.30
   0  -3   2  494.55   29.70
   0  -3  -2  442.86   30.60
   0  -3  -2  483.65   28.90
   0  -3  -2  491.35   30.80
   0  -3  -2  448.96   30.20
   0   3   2  509.65   29.60
   0   3  -2  498.25   27.00
   0   3  -2  504.65   29.20
   0   3  -2  501.25   29.30
   0   3   2  539.85   30.40
   0   3   2  464.45   30.80
   0   3   2  477.55   30.70
   0   3  -2  481.45   30.50
   0   3   2  465.85   29.90
   0   3  -2  445.26   29.30
   0   3   2  476.55   29.10
  -1  -3  -2  536.45   33.80
   1  -3   2  512.65   31.20
   1  -3   2  560.04   31.50
  -1  -3  -2  603.34   32.10
  -1  -3  -2  501.05   29.20
   1  -3   2  483.35   31.10
   1  -3   2  601.84   31.20
  -1  -3  -2  499.75   32.80
  -1  -3  -2  511.05   32.20
  -1   3  -2  503.55   30.40
   1   3   2  501.25   32.30
  -1   3  -2  466.35   31.40
   1   3   2  494.75   31.70
   1   3   2  526.15   30.00
   1   3   2  489.95   32.80
  -1   3  -2  524.55   30.70
   1   3   2  494.45   33.20
   1   3   2  498.15   31.20
   2  -3   2  886.11   53.19
   2  -3   2  969.30   53.09
   2  -3   2 1031.90   53.69
   2  -3   2  940.31   52.39
  -2  -3  -2  909.21   57.09
  -2  -3  -2  945.91   55.79
   2  -3   2  846.62   53.29
  -2  -3  -2  907.91   54.89
  -2  -3  -2  909.11   53.99
   2   3   2  908.61   51.39
   2   3   2 1110.39   55.59
  -2   3  -2  923.51   52.49
   2   3   2  970.60   57.49
  -2   3  -2  908.31   53.79
   2   3   2  869.61   54.89
  -2   3  -2  988.20   52.89
   2   3   2 1008.60   56.39
  -3  -3  -2  291.27   20.10
   3  -3   2  273.17   18.90
   3  -3   2  271.57   17.90
   3  -3   2  285.77   16.80
   3  -3   2  289.37   18.80
   3   3   2  281.37   15.60
   3   3   2  276.47   19.70
  -3   3  -2  216.28   16.90
  -3   3  -2  287.57   16.30
   3   3   2  285.87   23.20
   3   3   2  271.77   19.70
   4  -3   2   26.80    3.40
   4  -3   2   29.50    2.50
   4  -3   2   39.00    6.10
   4  -3   2   41.30    7.30
  -4  -3  -2   24.40    5.50
   4   3   2   29.00    2.80
   4   3   2   25.40    5.70
   4   3   2   35.20    6.90
   4   3   2   31.80    8.60
  -4   3  -2   31.30    2.20
   4   3   2   24.30    3.50
   4   3   2   27.50    5.70
  -4   3  -2   33.80    2.90
   5  -3   2  430.56   35.00
   5  -3   2  408.06   32.20
   5  -3   2  500.15   30.10
  -5  -3  -2  435.96   29.70
   5   3   2  461.95   26.90
   5   3   2  559.44   39.10
   5   3   2  498.55   30.20
   5   3   2  526.35   32.50
   5   3   2  455.85   29.90
   5   3   2  428.26   25.80
   6  -3   2  134.99   16.80
   6  -3   2  124.59   10.90
   6  -3   2  102.19   11.90
   6  -3   2  149.39   20.00
   6   3   2  138.49   20.60
   6   3   2  100.39   10.90
   6   3   2   99.29   13.20
   7  -3   2   13.70    4.70
   7  -3   2   31.10    6.60
   7  -3   2   15.90    7.60
   7  -3   2   21.40    8.40
   7   3   2   13.50   10.70
   7   3   2   18.30    6.30
   7   3   2   23.10    4.50
   8  -3   2    5.70    5.20
   8  -3   2   10.80    4.70
   8  -3   2    8.10    8.70
   8   3   2   15.30    7.40
   8  -4  -2  245.78   20.00
   8  -4  -2  200.38   25.20
   8   4  -2  239.18   30.30
   8   4  -2  251.57   23.70
   8   4  -2  257.27   22.30
   7  -4  -2  189.88   23.00
   7   4  -2  184.38   18.30
   7   4  -2  171.78   19.00
   7   4  -2  226.28   26.90
   6  -4  -2  147.09    9.20
   6  -4  -2  151.48   18.70
   6  -4  -2  117.29   11.10
  -6  -4   2  104.59   16.90
   6   4  -2  152.68   16.40
   6   4  -2  143.29   20.00
   6   4  -2  142.29   16.80
   5  -4  -2  428.56   28.60
   5  -4  -2  449.46   26.30
   5  -4  -2  445.56   33.90
  -5  -4   2  434.76   31.30
   5  -4  -2  482.45   27.70
   5   4  -2  474.55   36.10
  -5   4   2  425.46   25.80
   5   4  -2  486.75   30.10
   5   4  -2  423.56   31.10
   5   4  -2  437.46   32.30
   4  -4  -2   75.19    9.60
   4  -4  -2   81.69    7.40
  -4  -4   2   72.49    4.80
  -4  -4   2   72.09   10.10
   4  -4  -2   98.29   13.60
   4  -4  -2   80.69    8.20
   4   4  -2   67.79   11.10
   4   4  -2   78.29    9.80
  -4   4   2   71.49    6.00
  -4   4   2   79.19    6.90
   4   4  -2   82.69   10.70
   4   4  -2   67.69   12.30
   3  -4  -2  247.68   19.30
   3  -4  -2  230.18   17.00
   3  -4  -2  294.87   22.40
  -3  -4   2  276.17   15.60
   3  -4  -2  276.37   19.60
   3  -4  -2  258.87   18.20
  -3  -4   2  229.98   20.00
  -3  -4   2  270.07   19.80
  -3   4   2  275.37   16.40
  -3   4   2  274.77   18.10
   3   4  -2  275.07   21.40
   3   4  -2  276.67   19.90
   3   4  -2  276.57   21.80
   3   4  -2  260.77   19.90
  -2  -4   2  274.67   21.00
   2  -4  -2  312.37   19.70
  -2  -4   2  308.07   22.50
   2  -4  -2  271.77   20.80
  -2  -4   2  313.37   18.20
  -2  -4   2  319.17   20.70
   2  -4  -2  354.56   22.60
   2  -4  -2  319.27   23.00
  -2  -4   2  291.17   22.10
   2  -4  -2  289.07   21.00
   2   4  -2  265.77   20.90
   2   4  -2  302.77   22.30
  -2   4   2  293.37   20.70
  -2   4   2  325.17   21.40
   2   4  -2  288.37   21.60
  -2   4   2  299.97   21.80
  -2   4   2  298.27   19.10
   2   4  -2  352.46   22.40
  -2   4   2  295.17   23.30
   2   4  -2  325.67   23.60
   1  -4  -2  921.31   56.49
   1  -4  -2  920.11   56.19
  -1  -4   2 1069.39   57.49
   1  -4  -2  914.71   55.99
  -1  -4   2  948.31   56.89
   1  -4  -2  952.70   56.39
  -1  -4   2  939.21   56.19
   1  -4  -2  909.21   56.79
  -1  -4   2  944.51   55.39
   1  -4  -2  971.70   54.59
  -1   4   2  914.81   56.09
  -1   4   2 1066.09   58.09
   1   4  -2  924.91   56.09
  -1   4   2  910.71   55.79
   1   4  -2  918.71   54.79
  -1   4   2 1028.80   54.89
   1   4  -2 1012.80   55.99
   1   4  -2 1073.09   58.59
   1   4  -2  947.11   55.79
  -1   4   2  969.40   57.39
   0  -4  -2 1755.32  100.29
   0  -4  -2 1973.20  101.89
   0  -4   2 2011.80  101.39
   0  -4  -2 2010.40  102.49
   0  -4   2 1766.92  100.29
   0  -4  -2 1841.42   99.09
   0  -4  -2 1812.12   99.09
   0  -4   2 1804.82   99.49
   0  -4  -2 1784.92  101.19
   0  -4   2 1741.93  100.59
   0   4   2 1652.93   99.59
   0   4  -2 1711.63   99.39
   0   4  -2 1562.24   99.19
   0   4   2 1705.23  100.69
   0   4   2 1766.82   99.49
   0   4   2 1879.81  102.29
   0   4  -2 1775.82  101.49
   0   4  -2 1732.63   96.89
   0   4  -2 1814.12  100.09
   0   4   2 1956.80  101.59
   0   4   2 1705.73  100.29
  -1  -4  -2  141.09   11.90
  -1  -4  -2  127.09    9.10
   1  -4   2  125.59   10.70
  -1  -4  -2  127.29   12.60
   1  -4   2  131.39   11.50
  -1  -4  -2  144.19   14.20
  -1  -4  -2  152.08   15.10
   1  -4   2  111.99   11.60
   1  -4   2  122.09   11.50
  -1   4  -2  112.49   12.80
   1   4   2  114.89   12.60
   1   4   2  122.49   10.00
   1   4   2  109.59   11.50
   1   4   2  128.49   13.40
  -1   4  -2  122.39   10.10
   1   4   2  109.59   12.20
   1   4   2  126.89   14.40
  -1   4  -2  109.19   10.60
   2  -4   2 1139.29   62.39
  -2  -4  -2 1154.68   61.79
  -2  -4  -2 1298.97   68.39
   2  -4   2 1130.29   62.09
   2  -4   2 1086.29   65.09
   2  -4   2 1249.28   66.09
   2  -4   2 1106.79   64.99
   2   4   2 1131.39   62.79
  -2   4  -2 1158.18   66.09
   2   4   2 1053.09   66.89
   2   4   2 1085.99   68.69
   2   4   2 1094.09   66.39
  -2   4  -2 1189.78   66.19
   2   4   2 1147.69   68.29
   3  -4   2  392.06   23.40
   3  -4   2  391.46   23.20
  -3  -4  -2  384.56   26.40
   3  -4   2  405.46   24.70
   3  -4   2  379.46   24.20
   3  -4   2  340.57   24.00
   3   4   2  341.67   27.80
   3   4   2  390.86   26.50
   3   4   2  327.87   25.20
   3   4   2  343.07   25.30
  -3   4  -2  301.97   23.10
   4  -4   2  172.38   20.40
   4  -4   2  130.99   13.10
   4  -4   2  142.49   10.30
   4  -4   2  137.39   11.30
   4  -4   2  150.78   13.20
  -4  -4  -2  138.89   14.90
   4   4   2  155.28   14.40
  -4   4  -2  160.28   11.00
   4   4   2  168.78   15.40
   4   4   2  174.08   15.20
   4   4   2  176.78   20.30
  -5  -4  -2   85.39   10.60
   5  -4   2   72.19   10.70
   5  -4   2   59.69    4.40
   5  -4   2   56.99   12.90
   5  -4   2   77.39    9.60
   5  -4   2   64.29    4.10
   5   4   2   47.10   12.30
   5   4   2   56.69    9.00
   5   4   2   61.49    9.80
   6  -4   2  437.16   29.90
   6  -4   2  455.45   33.00
   6  -4   2  430.56   36.20
   6   4   2  447.56   30.10
   6   4   2  457.05   38.20
   6   4   2  403.66   32.00
   7  -4   2  197.38   15.90
   7  -4   2  177.48   24.10
   7  -4   2  204.18   17.70
   7   4   2  197.98   26.70
   7   4   2  200.58   16.20
   7   4   2  190.08   20.90
   8  -5  -2  319.97   33.10
   8   5  -2  267.17   24.90
   7  -5  -2  522.15   41.10
   7   5  -2  517.45   38.20
   7   5  -2  534.25   38.70
   7   5  -2  515.55   44.00
   6  -5  -2  408.86   34.90
   6   5  -2  421.26   36.90
   6   5  -2  508.85   34.70
   6   5  -2  430.26   33.70
  -5  -5   2  174.08   19.50
   5  -5  -2  124.99   17.60
   5  -5  -2  133.19   11.50
   5  -5  -2  140.09   11.20
   5   5  -2  131.49   14.80
   5   5  -2  138.19   17.50
   5   5  -2  148.49   17.00
   5   5  -2  184.18   22.10
   4  -5  -2  557.14   32.00
   4  -5  -2  479.15   31.10
   4  -5  -2  516.05   33.70
  -4  -5   2  517.55   35.70
   4  -5  -2  534.65   37.50
   4   5  -2  467.95   33.60
   4   5  -2  437.36   35.90
  -4   5   2  468.75   30.50
  -4   5   2  530.95   29.20
   4   5  -2  478.75   35.40
   4   5  -2  513.95   36.50
   3  -5  -2  290.27   21.80
   3  -5  -2  267.87   20.10
  -3  -5   2  278.57   15.90
   3  -5  -2  288.17   23.50
   3  -5  -2  247.08   19.70
   3  -5  -2  290.27   18.80
  -3  -5   2  254.07   20.70
   3   5  -2  266.97   21.30
   3   5  -2  263.27   21.90
  -3   5   2  258.97   19.30
  -3   5   2  264.67   17.30
   3   5  -2  249.58   22.30
   2  -5  -2   52.89    8.50
  -2  -5   2   64.49    9.40
   2  -5  -2   54.69    8.40
   2  -5  -2   70.49   10.30
   2  -5  -2   66.79   10.40
  -2  -5   2   48.10    8.80
   2  -5  -2   62.59    7.60
   2   5  -2   73.29   11.70
  -2   5   2   60.49    7.20
   2   5  -2   55.89    8.80
  -2   5   2   56.29    8.20
  -2   5   2   49.10    8.30
   2   5  -2   57.39    8.70
   1  -5  -2   22.50    5.00
   1  -5  -2   18.90    5.00
  -1  -5   2   30.70    6.70
   1  -5  -2   41.60    7.70
   1  -5  -2   26.30    6.00
  -1  -5   2   39.60    7.10
   1  -5  -2   25.80    7.30
  -1   5   2   14.60    5.10
  -1   5   2   20.80    4.70
   1   5  -2   24.80    5.50
  -1   5   2   21.90    6.20
   1   5  -2   37.30    9.10
   1   5  -2   25.90    5.30
   0  -5  -2 1726.43   93.79
   0  -5  -2 1639.64   95.39
   0  -5   2 1678.13   94.89
   0  -5   2 1610.64   95.29
   0  -5  -2 1716.93   93.49
   0  -5   2 1644.24   94.19
   0  -5  -2 1579.74   95.79
   0   5   2 1790.52   94.49
   0   5   2 1660.83   95.29
   0   5  -2 1707.03   96.79
   0   5  -2 1666.93   91.09
   0   5   2 1662.73   95.89
   0   5   2 1632.04   95.09
   0   5  -2 1614.54   94.09
   1  -5   2 1403.96   79.69
  -1  -5  -2 1388.06   75.99
   1  -5   2 1319.27   78.29
   1  -5   2 1386.36   79.29
  -1  -5  -2 1259.77   80.09
   1  -5   2 1370.26   78.29
   1   5   2 1401.46   79.79
   1   5   2 1320.27   80.19
  -1   5  -2 1312.67   79.89
   1   5   2 1490.65   81.19
  -2  -5  -2  375.86   21.70
   2  -5   2  367.86   26.90
  -2  -5  -2  393.06   28.20
   2  -5   2  337.67   25.40
   2  -5   2  409.56   26.30
   2  -5   2  385.96   21.30
   2   5   2  362.16   27.80
   2   5   2  402.86   29.00
  -2   5  -2  370.66   26.40
   2   5   2  364.56   27.10
   3  -5   2  777.82   43.40
   3  -5   2  765.42   45.40
   3  -5   2  792.12   43.00
   3  -5   2  738.93   46.40
   3  -5   2  753.52   46.40
  -3  -5  -2  721.23   48.40
   3   5   2  756.52   50.89
  -3   5  -2  737.83   45.70
   3   5   2  708.03   48.20
   3   5   2  769.82   48.30
   3   5   2  729.73   48.00
   4  -5   2   44.00    6.20
   4  -5   2   42.80    7.80
   4  -5   2   37.70    6.70
  -4  -5  -2   44.30    8.80
   4  -5   2   43.80    6.00
   4  -5   2   44.50    6.90
   4  -5   2   29.10   10.60
   4   5   2   27.90    8.00
   4   5   2   52.49    9.60
   4   5   2   32.90   10.40
   4   5   2   39.80    8.90
   5  -5   2   95.69   12.40
   5  -5   2  114.19    9.30
   5  -5   2  111.49   12.00
   5  -5   2  161.08   21.50
   5   5   2  111.29   15.30
   5   5   2  105.09   13.80
   5   5   2  105.19   17.80
   6  -5   2  693.53   50.09
   6  -5   2  657.53   41.70
   6   5   2  601.14   41.90
   6   5   2  612.24   44.20
   6   5   2  625.94   49.50
   7  -5   2   65.49   14.60
   7  -5   2   65.39   10.30
   7   5   2   47.40    9.40
   7   5   2   41.00   12.60
   7   5   2   52.89   12.00
   7  -6  -2  135.49   21.70
   7   6  -2  214.58   23.20
   7   6  -2  162.28   20.20
   7   6  -2  188.38   26.10
   6  -6  -2  371.46   23.60
   6  -6  -2  353.36   32.10
   6   6  -2  366.56   34.10
   6   6  -2  404.56   32.00
   6   6  -2  390.46   30.80
  -5  -6   2   92.79   15.30
   5  -6  -2  101.19   17.00
   5  -6  -2  101.39   10.60
   5  -6  -2   98.39   11.10
   5   6  -2   85.39   14.00
   5   6  -2   90.89   15.20
   5   6  -2  122.99   18.80
  -4  -6   2  388.26   30.60
   4  -6  -2  306.07   28.20
   4  -6  -2  358.96   24.70
   4  -6  -2  335.97   23.90
   4   6  -2  403.86   28.60
   4   6  -2  282.77   27.50
  -4   6   2  359.86   23.90
   4   6  -2  362.06   29.70
   3  -6  -2  737.53   50.39
   3  -6  -2  748.93   51.79
   3  -6  -2  780.32   49.30
  -3  -6   2  795.52   43.90
   3  -6  -2  807.12   51.19
  -3  -6   2  785.62   45.60
  -3  -6   2  767.52   49.90
   3  -6  -2  837.32   47.90
  -3  -6   2  949.40   55.09
   3   6  -2  832.52   53.49
   3   6  -2  716.63   49.80
   3   6  -2  809.62   51.29
  -3   6   2  750.72   48.40
  -2  -6   2  171.98   16.50
   2  -6  -2  159.68   15.40
   2  -6  -2  180.08   15.10
  -2  -6   2  171.88   20.00
   2  -6  -2  188.48   19.90
   2  -6  -2  193.78   18.40
   2  -6  -2  190.38   16.70
   2   6  -2  194.78   20.50
   2   6  -2  182.48   17.00
  -2   6   2  176.18   15.40
  -2   6   2  214.08   17.50
   2   6  -2  200.28   16.80
  -1  -6   2  389.26   27.80
   1  -6  -2  376.16   27.50
   1  -6  -2  402.76   26.30
   1  -6  -2  379.06   27.30
  -1  -6   2  394.86   30.20
   1  -6  -2  376.26   27.90
   1   6  -2  356.66   25.00
  -1   6   2  355.56   26.50
   1   6  -2  453.65   28.70
   1   6  -2  383.16   29.60
  -1   6   2  372.46   27.90
   0  -6  -2  990.10   63.79
   0  -6  -2 1213.08   65.39
   0  -6   2 1116.39   68.69
   0  -6   2 1122.29   66.09
   0  -6  -2 1018.90   66.99
   0   6   2 1253.67   67.29
   0   6   2 1093.69   67.29
   0   6  -2 1154.38   61.99
   0   6  -2 1043.50   65.49
   0   6  -2 1045.90   67.69
   0   6   2 1065.69   66.39
   1  -6   2   30.30    7.70
   1  -6   2   31.30    7.20
  -1  -6  -2   26.90    8.10
  -1  -6  -2   39.40    5.70
   1  -6   2   41.70    7.90
   1   6   2   34.50    8.60
  -1   6  -2   24.20    7.70
   1   6   2   18.00    6.50
   1   6   2   34.10    7.80
  -2  -6  -2  249.38   14.90
   2  -6   2  218.08   19.00
   2  -6   2  256.47   20.10
   2  -6   2  226.38   20.50
   2  -6   2  246.78   13.30
  -2  -6  -2  232.78   21.70
   2   6   2  230.08   20.80
   2   6   2  213.68   19.80
   2   6   2  219.18   21.40
  -2   6  -2  205.38   19.10
   3  -6   2  613.74   40.00
   3  -6   2  611.74   41.00
   3  -6   2  620.14   35.80
   3  -6   2  600.74   40.90
   3  -6   2  643.74   35.80
   3  -6   2  653.23   46.90
  -3  -6  -2  610.44   43.20
   3   6   2  576.74   41.70
   3   6   2  655.93   45.80
   3   6   2  680.53   44.20
  -3   6  -2  696.43   41.30
   4  -6   2  120.39   13.40
  -4  -6  -2   90.69   13.90
   4  -6   2   92.49   11.50
   4  -6   2   90.79   16.50
   4   6   2   70.19   15.10
   4   6   2   91.09   13.90
   4   6   2   96.39   14.40
   5  -6   2   66.19   15.40
   5  -6   2   57.09    9.90
   5  -6   2   56.09    8.00
   5   6   2   76.69   12.90
   5   6   2   55.99   10.90
   5   6   2   91.59   15.80
   6  -6   2  310.97   25.10
   6  -6   2  292.97   33.50
   6   6   2  304.27   25.60
   6   6   2  331.87   33.00
   6   6   2  298.17   27.40
   7   7  -2   98.09   18.90
   7   7  -2  117.29   20.70
   6  -7  -2    2.50    8.90
   6  -7  -2   14.50    4.20
   6   7  -2   14.00    8.20
   6   7  -2   10.00    8.40
   6   7  -2   30.80   10.30
  -5  -7   2  366.96   31.70
   5  -7  -2  351.16   24.70
   5  -7  -2  344.37   31.60
   5  -7  -2  322.57   24.20
   5   7  -2  330.27   28.90
   5   7  -2  310.77   29.60
   5   7  -2  367.76   32.00
   4  -7  -2  661.43   45.60
   4  -7  -2  606.54   39.40
  -4  -7   2  522.55   43.50
   4  -7  -2  581.94   38.40
   4   7  -2  557.04   41.70
   4   7  -2  554.94   43.40
   4   7  -2  688.13   44.70
  -3  -7   2  404.16   31.10
  -3  -7   2  475.85   36.30
   3  -7  -2  405.76   35.60
   3  -7  -2  403.26   29.00
  -3  -7   2  454.45   27.10
   3  -7  -2  466.65   34.70
   3  -7  -2  464.55   31.90
  -3   7   2  430.36   30.80
   3   7  -2  402.76   31.80
   3   7  -2  399.56   34.30
   3   7  -2  431.96   32.60
  -2  -7   2  161.38   15.40
   2  -7  -2  196.08   20.60
  -2  -7   2  186.78   19.30
   2  -7  -2  164.48   18.50
   2  -7  -2  185.78   16.00
  -2  -7   2  147.19   20.10
  -2   7   2  211.78   18.50
  -2   7   2  181.38   16.20
   2   7  -2  215.58   19.20
   2   7  -2  193.38   22.20
   2   7  -2  203.78   17.80
   1  -7  -2  108.69   13.20
  -1  -7   2  110.89   16.30
  -1  -7   2  112.99   14.40
  -1  -7   2  150.88   15.70
   1  -7  -2  136.19   16.30
   1  -7  -2  125.49   14.90
   1   7  -2   93.99   13.60
   1   7  -2  101.69   12.00
   1   7  -2   88.19   15.30
  -1   7   2  112.29   14.90
  -1   7   2  104.69   13.00
   0  -7   2   51.19    9.80
   0  -7  -2   46.80    8.50
   0  -7  -2   51.99    8.50
   0  -7   2   37.90   10.50
   0  -7  -2   43.50    9.60
   0  -7   2   46.40    9.50
   0   7  -2   41.30    8.90
   0   7   2   35.30    8.20
   0   7   2   34.70    9.00
   0   7   2   28.00    8.50
   0   7  -2   42.10    5.70
   0   7  -2   44.50    9.90
   1  -7   2  160.78   19.40
   1  -7   2  158.88   17.90
  -1  -7  -2  201.28   21.70
   1  -7   2  159.18   20.30
  -1  -7  -2  167.48   13.90
   1   7   2  156.18   18.40
   1   7   2  200.38   21.10
   1   7   2  206.58   19.20
  -1   7  -2  205.78   21.30
  -2  -7  -2  323.57   20.10
   2  -7   2  274.47   25.40
   2  -7   2  324.17   28.50
   2  -7   2  331.97   25.60
   2  -7   2  319.27   26.10
  -2  -7  -2  331.57   28.30
   2   7   2  337.57   27.30
   2   7   2  347.47   28.90
  -2   7  -2  310.87   26.00
   2   7   2  373.36   28.70
   3  -7   2  324.97   27.70
   3  -7   2  415.66   33.70
   3  -7   2  344.27   27.60
  -3  -7  -2  406.06   31.30
   3   7   2  415.96   32.80
   3   7   2  404.76   31.70
   3   7   2  358.76   29.60
   4  -7   2   83.79   13.00
  -4  -7  -2  116.79   16.20
   4  -7   2  117.19   14.50
   4  -7   2  109.99   18.90
   4   7   2  110.89   15.90
   4   7   2  134.19   19.80
   4   7   2  127.39   17.30
   5  -7   2  235.58   22.70
   5  -7   2  240.38   29.50
   5  -7   2  301.97   21.10
   5   7   2  237.18   25.50
   5   7   2  239.78   30.70
   5   7   2  373.96   28.60
   6  -7   2  154.08   18.50
   6  -7   2  128.49   25.90
   6   7   2  236.08   30.60
   6   7   2  176.68   22.30
   6   7   2  181.08   20.70
   6   8  -2   66.79   16.00
   5  -8  -2  134.89   20.60
  -5  -8   2  101.69   18.50
   5  -8  -2  111.59   13.40
   5   8  -2   97.59   16.10
   5   8  -2   97.39   17.50
   5   8  -2   74.69   16.10
   4  -8  -2  191.88   17.40
  -4  -8   2  175.88   23.50
   4  -8  -2  196.48   18.70
   4  -8  -2  207.28   25.20
   4   8  -2  242.38   22.70
   4   8  -2  162.68   21.60
   4   8  -2  222.08   25.60
   3  -8  -2   96.29   15.60
   3  -8  -2  124.59   15.30
  -3  -8   2  122.59   16.00
  -3  -8   2   96.89   17.50
   3  -8  -2   84.09   12.10
  -3   8   2   70.59   11.70
   3   8  -2   90.09   14.50
   3   8  -2   90.19   16.80
   3   8  -2   75.09   13.70
  -2  -8   2 1035.80   60.09
  -2  -8   2  952.20   62.49
   2  -8  -2  934.21   62.99
   2  -8  -2 1031.50   60.69
   2  -8  -2  979.50   63.29
  -2  -8   2  948.21   65.89
   2   8  -2  929.01   62.79
  -2   8   2 1075.99   60.89
   2   8  -2  990.10   61.19
  -2   8   2 1013.20   62.99
   2   8  -2  956.10   65.29
  -1  -8   2  181.38   23.10
   1  -8  -2  235.98   23.70
   1  -8  -2  235.18   20.30
  -1  -8   2  186.08   21.00
   1  -8  -2  199.38   18.40
  -1  -8   2  201.48   19.40
   1   8  -2  197.58   17.30
   1   8  -2  177.48   22.90
  -1   8   2  227.48   18.70
   1   8  -2  200.08   20.10
  -1   8   2  191.98   21.70
   0  -8   2  109.29   17.60
   0  -8  -2  139.69   15.50
   0  -8  -2  123.09   14.10
   0  -8  -2  123.39   17.20
   0  -8   2  140.19   18.10
   0  -8   2  141.99   17.30
   0   8  -2  107.99   16.80
   0   8   2  121.09   15.80
   0   8   2  122.29   15.50
   0   8  -2  139.59   16.30
   0   8   2  136.59   18.30
  -1  -8  -2    2.40    6.70
   1  -8   2    9.70    6.50
   1  -8   2   25.20    9.00
  -1  -8  -2    9.00    4.10
   1  -8   2   18.90    7.60
   1   8   2   15.20    7.40
  -1   8  -2   17.70    8.50
   1   8   2    8.70    6.30
   1   8   2    6.20    6.70
   2  -8   2   -9.00    6.10
   2  -8   2    1.60    6.30
   2  -8   2    6.60    6.00
  -2  -8  -2    2.70    5.40
   2   8   2   12.70    7.60
  -2   8  -2   -0.50    5.60
   2   8   2    3.10    5.10
   2   8   2   10.50    6.90
   3  -8   2  124.29   19.40
  -3  -8  -2  143.09   19.20
   3  -8   2  106.09   15.70
   3  -8   2  107.49   14.80
   3   8   2   75.49   15.30
   3   8   2  117.29   17.90
   3   8   2  130.79   18.10
   4  -8   2  569.24   48.50
  -4  -8  -2  637.34   46.50
   4  -8   2  690.93   44.30
   4  -8   2  593.94   42.70
   4   8   2  573.64   44.90
   4   8   2  704.63   49.90
   4   8   2  652.33   46.30
   5  -8   2    6.30    5.10
   5  -8   2    9.10    8.30
   5  -8   2    9.40    5.30
   5   8   2    8.90    8.80
   5   8   2   19.70    7.80
   5   8   2   23.10   11.50
   5  -9  -2  187.78   29.30
   5  -9  -2  227.48   20.00
   5   9  -2  182.98   24.90
  -4  -9   2  234.88   27.90
   4  -9  -2  249.08   28.10
   4  -9  -2  235.38   21.70
   4   9  -2  227.78   25.40
   4   9  -2  199.38   26.30
   4   9  -2  208.78   22.40
  -3  -9   2  172.58   20.00
   3  -9  -2  136.09   16.00
  -3  -9   2  180.18   23.50
   3  -9  -2  150.48   21.30
   3  -9  -2  129.59   17.60
   3   9  -2  144.29   20.10
   3   9  -2  137.79   18.00
   3   9  -2  113.59   19.00
  -2  -9   2   58.29   11.50
   2  -9  -2   57.49   12.40
   2  -9  -2   41.20   10.90
   2  -9  -2   45.30    9.60
  -2  -9   2   43.00   13.10
  -2   9   2   41.40   10.80
   2   9  -2   67.29   12.70
   2   9  -2   68.09   15.10
   1  -9  -2  186.38   20.20
   1  -9  -2  175.68   22.00
   1  -9  -2  175.68   18.90
  -1  -9   2  164.28   19.50
  -1  -9   2  181.78   19.60
  -1  -9   2  150.28   21.30
   1   9  -2  212.08   22.70
  -1   9   2  174.38   21.10
   1   9  -2  138.59   20.90
  -1   9   2  152.48   16.20
   0  -9  -2  140.29   15.70
   0  -9  -2  129.99   18.50
   0  -9   2  114.99   16.20
   0  -9   2  124.49   17.30
   0  -9   2  136.19   20.30
   0   9   2  105.59   15.50
   0   9  -2  118.29   18.00
   0   9   2  133.89   18.40
   0   9  -2  122.69   16.30
   0   9   2  121.89   16.20
   1  -9   2  268.17   27.90
   1  -9   2  264.97   23.30
   1  -9   2  265.97   27.80
  -1  -9  -2  253.57   26.90
  -1   9  -2  190.58   24.50
   1   9   2  203.28   21.90
   1   9   2  242.58   24.00
   1   9   2  205.68   24.30
   2  -9   2   60.79   11.80
   2  -9   2   62.99   14.10
  -2  -9  -2   53.09   12.00
   2  -9   2   64.69   13.90
   2   9   2   64.79   13.90
   2   9   2   49.00   12.20
   2   9   2   53.19   11.80
   3  -9   2  235.18   25.00
   3  -9   2  259.27   29.50
   3  -9   2  192.88   23.70
  -3  -9  -2  242.18   28.10
   3   9   2  280.57   26.60
   3   9   2  304.87   27.80
   3   9   2  282.27   28.50
   4  -9   2    9.80    6.90
   4  -9   2   13.60    7.40
   4  -9   2   18.30    9.40
   4   9   2   30.00   11.00
   4   9   2   13.80   10.40
   4   9   2    5.20    8.30
  -3 -10   2   93.69   19.30
   3 -10  -2  147.19   21.00
   3 -10  -2   99.89   17.40
   3 -10  -2   86.29   13.80
   3  10  -2  133.09   22.30
   3  10  -2  148.29   21.30
  -2 -10   2   13.10   10.50
  -2 -10   2    5.40    7.70
   2 -10  -2    5.40    7.40
   2 -10  -2    2.00    5.30
   2 -10  -2   13.80    7.60
   2  10  -2   14.00    6.80
   2  10  -2   -2.20    8.20
   1 -10  -2   40.20    9.50
  -1 -10   2   67.79   12.80
   1 -10  -2   23.90    8.50
   1 -10  -2   43.20   10.20
  -1 -10   2   35.80   12.90
  -1  10   2   42.80   11.80
   1  10  -2   35.80   12.10
   1  10  -2   32.20   10.50
   0 -10   2  162.68   20.00
   0 -10  -2  177.78   23.30
   0 -10   2  194.88   24.80
   0 -10   2  154.08   20.50
   0  10   2  145.09   20.90
   0  10   2  129.49   18.90
   0  10  -2  172.28   23.10
   0  10  -2  131.19   18.20
   1 -10   2   52.69   11.90
  -1 -10  -2   44.10   13.20
   1 -10   2   39.00   12.50
   1 -10   2   28.60   10.90
   1  10   2   38.90   11.70
   1  10   2   53.39   12.30
   1  10   2   38.90   12.20
   2 -10   2  214.28   27.30
   2 -10   2  276.17   27.20
   2 -10   2  244.88   27.10
  -2 -10  -2  225.08   27.60
   2  10   2  262.97   25.90
   2  10   2  234.48   27.20
   2  10   2  265.37   29.40
   9   0  -3  332.87   27.00
   9   0  -3  325.77   35.20
   8   0  -3   -1.20    4.00
   8   0  -3    0.80    3.80
   7   0  -3  967.70   53.99
   7   0  -3  860.11   50.89
   7   0  -3  809.22   53.49
   6   0  -3  320.87   22.60
   6   0  -3  317.57   21.20
   6   0  -3  326.27   23.50
   6   0  -3  317.67   19.10
   5   0  -3  299.77   19.60
  -5   0   3  314.97   23.30
  -5   0   3  321.07   19.50
   5   0  -3  308.17   18.10
   5   0  -3  296.47   21.40
   5   0  -3  294.57   20.50
   5   0  -3  297.57   19.70
   4   0  -3  456.55   24.00
  -4   0   3  399.46   26.70
  -4   0   3  396.96   22.90
  -4   0   3  407.46   23.80
   4   0  -3  351.26   24.90
   4   0  -3  360.06   24.20
   4   0  -3  397.26   24.00
   4   0  -3  403.26   22.90
   3   0  -3  389.26   22.40
   3   0  -3  379.46   23.00
  -3   0   3  402.46   24.90
   3   0  -3  418.46   22.60
  -3   0   3  374.36   22.80
  -3   0   3  413.36   22.60
   3   0  -3  384.66   24.20
   3   0  -3  366.46   23.30
   2   0  -3 1463.65   81.49
   2   0  -3 1448.76   80.39
   2   0  -3 1605.44   79.99
  -2   0   3 1532.05   80.59
  -2   0   3 1532.25   80.59
  -2   0   3 1628.94   82.19
   2   0  -3 1397.26   80.59
  -2   0   3 1311.47   79.89
  -1   0   3 8847.51  477.65
   1   0  -3 8477.65  479.95
   1   0  -3 9999.00  476.15
   1   0  -3 9206.38  478.05
  -1   0   3 9322.07  479.45
  -1   0   3 8158.68  476.55
   1   0  -3 8613.74  477.75
  -1   0   3 8819.62  480.55
  -1   0   3 8914.41  477.55
   0   0   3 3764.22  187.88
   0   0   3 3486.35  188.48
   0   0  -3 3576.64  188.58
   0   0   3 3639.94  187.58
   0   0  -3 3674.93  187.78
   0   0  -3 3484.15  187.68
   0   0  -3 3465.55  188.38
   0   0   3 2977.10  188.08
   0   0   3 3542.15  189.38
  -1   0  -3   21.00    2.70
  -1   0  -3   17.70    3.80
  -1   0  -3   24.80    2.70
   1   0   3   20.40    4.40
  -1   0  -3   21.70    1.90
   1   0   3   24.70    3.50
   1   0   3   19.70    2.20
   1   0   3   26.70    2.80
   1   0   3   17.70    2.60
  -2   0  -3  114.49    8.00
   2   0   3  106.89    7.70
   2   0   3  114.99    7.20
  -2   0  -3  112.99    7.30
   2   0   3  107.99   10.70
   2   0   3  117.39    8.10
  -2   0  -3   99.99   10.60
   3   0   3   43.80    4.80
  -3   0  -3   40.20    3.30
  -3   0  -3   52.09    5.00
   3   0   3   39.70    7.40
   3   0   3   43.60    3.40
   3   0   3   38.20    4.80
  -3   0  -3   27.20    6.40
  -4   0  -3  149.19    8.60
   4   0   3  145.79   10.00
   4   0   3  171.38   16.40
   4   0   3  135.29   11.00
   4   0   3  135.49    8.60
  -4   0  -3  151.98    9.60
   5   0   3 1539.15   90.99
   5   0   3 1470.05   84.29
   6   0   3    8.60    4.30
   6   0   3   -0.10    5.40
   6   0   3   13.60    8.00
   7   0   3  115.09   12.20
   7   0   3  122.69   16.30
   7   0   3  137.09   20.00
   7   0   3  120.49   13.60
   8   0   3   40.20    7.50
   8   0   3   35.50    8.80
   8   0   3   36.60   12.90
   9  -1  -3   49.70   14.90
   9  -1  -3   45.20    9.50
   9   1  -3   47.80   14.90
   9   1  -3   45.10   10.40
   8  -1  -3  564.54   39.00
   8  -1  -3  603.34   37.60
   8   1  -3  534.95   37.80
   8   1  -3  487.55   44.80
   7  -1  -3  174.98   16.30
   7  -1  -3  138.89   13.50
   7  -1  -3  118.39   10.10
   7  -1  -3  150.68   11.10
   7   1  -3  139.89   13.90
   7   1  -3  162.28   13.30
   7   1  -3  171.68   13.50
  -6  -1   3  631.74   38.10
   6  -1  -3  639.74   35.80
   6  -1  -3  663.23   36.20
   6  -1  -3  660.63   41.50
   6  -1  -3  648.54   37.00
   6  -1  -3  670.23   39.10
   6   1  -3  613.24   35.90
  -6   1   3  638.84   36.40
   6   1  -3  604.94   39.50
   6   1  -3  597.34   38.90
   6   1  -3  584.14   38.10
   5  -1  -3   36.90    4.40
  -5  -1   3   50.59    7.70
  -5  -1   3   33.90    5.40
   5  -1  -3   35.80    4.70
   5  -1  -3   50.19    8.30
   5   1  -3   35.70    5.80
  -5   1   3   34.10    4.60
   5   1  -3   41.50    5.80
   5   1  -3   36.00    4.20
  -5   1   3   32.20    4.20
   5   1  -3   47.50    6.90
   5   1  -3   39.30    6.10
   4  -1  -3  276.57   20.10
  -4  -1   3  283.97   18.70
  -4  -1   3  284.97   17.30
  -4  -1   3  291.57   19.60
   4  -1  -3  272.57   17.10
   4  -1  -3  289.87   17.10
   4   1  -3  304.07   19.20
  -4   1   3  275.47   16.80
   4   1  -3  278.57   18.50
  -4   1   3  299.77   21.80
  -4   1   3  274.77   17.30
   4   1  -3  261.77   18.60
   4   1  -3  313.87   17.40
   4   1  -3  269.27   18.00
   3  -1  -3 1339.67   74.79
   3  -1  -3 1310.67   77.29
  -3  -1   3 1342.67   76.19
   3  -1  -3 1424.86   73.29
   3  -1  -3 1401.66   73.59
  -3  -1   3 1360.16   75.09
  -3  -1   3 1540.35   76.29
   3  -1  -3 1526.25   74.79
   3   1  -3 1273.07   75.59
   3   1  -3 1313.57   76.19
   3   1  -3 1330.77   75.29
  -3   1   3 1392.66   75.09
   3   1  -3 1414.76   75.09
  -3   1   3 1317.97   77.99
   3   1  -3 1342.27   75.59
  -3   1   3 1304.27   74.39
  -2  -1   3 5218.08  283.17
  -2  -1   3 5167.38  283.47
  -2  -1   3 5453.75  283.77
  -2  -1   3 5305.57  283.57
   2  -1  -3 5238.68  285.47
   2  -1  -3 5097.89  283.87
   2  -1  -3 5130.59  283.07
   2  -1  -3 5674.73  284.87
  -2  -1   3 5106.39  283.67
  -2   1   3 4960.80  283.47
   2   1  -3 5494.95  283.17
  -2   1   3 5064.79  284.87
   2   1  -3 5833.62  284.27
   2   1  -3 5308.27  284.37
   2   1  -3 5423.16  285.77
   2   1  -3 5349.86  283.37
  -2   1   3 5311.97  283.27
   1  -1  -3   29.30    4.90
   1  -1  -3   23.30    3.20
  -1  -1   3   20.70    3.00
  -1  -1   3   21.40    2.40
   1  -1  -3   25.20    3.20
  -1  -1   3   17.40    2.80
   1  -1  -3   18.80    3.20
  -1  -1   3   26.90    3.10
  -1  -1   3   18.50    3.20
  -1   1   3   17.70    2.80
  -1   1   3   13.30    3.00
   1   1  -3   14.40    2.60
   1   1  -3   14.60    2.70
   1   1  -3   16.60    3.10
   1   1  -3   18.60    3.20
   1   1  -3   17.50    2.60
  -1   1   3   14.90    3.90
  -1   1   3   15.70    3.20
   0  -1   3 2890.61  154.38
   0  -1  -3 2845.82  156.78
   0  -1   3 3124.29  153.78
   0  -1  -3 2813.02  155.18
   0  -1  -3 3062.09  154.98
   0  -1  -3 2878.81  154.88
   0  -1   3 2872.01  154.68
   0  -1   3 2851.31  154.78
   0  -1  -3 2836.12  154.68
   0  -1   3 2990.50  155.48
   0  -1   3 2768.72  154.78
   0   1   3 2684.03  154.38
   0   1   3 2834.52  156.78
   0   1  -3 2945.11  154.28
   0   1  -3 3039.70  155.08
   0   1   3 2854.81  154.78
   0   1   3 2928.01  155.38
   0   1   3 2672.53  154.88
   0   1  -3 3114.49  154.98
   0   1  -3 2627.34  154.38
  -1  -1  -3  662.23   36.20
  -1  -1  -3  615.14   38.10
  -1  -1  -3  619.94   35.00
   1  -1   3  646.04   34.60
  -1  -1  -3  627.74   35.30
   1  -1   3  639.34   36.10
   1  -1   3  631.54   34.80
  -1  -1  -3  615.44   35.30
   1  -1   3  598.24   35.50
   1   1   3  594.44   37.80
   1   1   3  658.73   35.50
   1   1   3  656.03   35.40
  -1   1  -3  599.74   36.10
  -1   1  -3  608.24   35.00
   1   1   3  652.63   36.20
  -1   1  -3  629.94   35.00
   1   1   3  611.94   35.30
  -1   1  -3  606.44   34.40
   2  -1   3 2644.94  136.29
  -2  -1  -3 2609.04  136.89
   2  -1   3 2478.35  137.39
   2  -1   3 2725.83  139.39
  -2  -1  -3 2440.56  141.09
   2  -1   3 2497.35  135.99
  -2  -1  -3 2435.36  136.69
  -2  -1  -3 2442.86  137.79
   2  -1   3 2500.45  135.89
   2   1   3 2478.95  138.09
   2   1   3 2541.95  137.49
  -2   1  -3 2425.56  136.39
   2   1   3 2484.85  136.89
  -2   1  -3 2637.34  135.99
   2   1   3 2709.43  141.39
  -2   1  -3 2517.95  139.29
   2   1   3 2629.04  137.29
  -3  -1  -3 1039.70   60.69
  -3  -1  -3 1161.28   59.99
   3  -1   3 1085.49   59.29
   3  -1   3 1128.79   60.49
   3  -1   3 1110.39   58.59
  -3  -1  -3 1058.39   59.19
   3  -1   3 1103.19   58.69
   3  -1   3 1120.39   63.79
   3   1   3 1072.09   59.39
   3   1   3 1027.10   64.99
   3   1   3 1000.50   60.59
   3   1   3 1036.10   60.79
  -3   1  -3 1082.99   58.59
  -3   1  -3 1067.39   58.69
   4  -1   3  769.52   42.50
   4  -1   3  750.32   49.80
  -4  -1  -3  787.22   43.60
   4  -1   3  849.72   45.20
   4  -1   3  751.32   45.30
  -4  -1  -3  802.62   45.60
   4   1   3  781.42   51.79
   4   1   3  801.92   46.50
   4   1   3  824.52   46.10
   4   1   3  786.62   43.80
   5  -1   3   67.19    8.10
   5  -1   3   62.69   11.30
  -5  -1  -3   66.39    4.90
   5  -1   3   71.39    7.90
   5   1   3   72.09    5.40
   5   1   3   92.09   10.00
   5   1   3   72.19    6.70
   5   1   3   72.99   13.70
   6  -1   3  958.20   63.99
   6  -1   3 1024.80   58.29
   6  -1   3  958.10   57.89
   6  -1   3 1062.59   65.79
   6   1   3  984.60   59.59
   6   1   3 1001.40   53.49
   6   1   3  958.20   66.49
   7  -1   3  103.29   11.80
   7  -1   3  110.89   12.50
   7  -1   3  132.69   17.70
   7  -1   3   98.59   17.30
   7   1   3  122.89   20.30
   7   1   3  102.49   13.10
   8  -1   3  124.79   20.40
   8  -1   3  121.59   14.00
   8   1   3  125.79   21.50
   8   1   3  135.49   16.10
   8   1   3  123.69   13.30
   9  -2  -3  202.08   22.30
   9  -2  -3  158.88   18.20
   8  -2  -3   95.99   12.30
   8  -2  -3  100.39   14.80
   8   2  -3   82.69   11.20
   8   2  -3  119.39   21.40
   8   2  -3  111.49   14.90
   7  -2  -3  381.46   23.50
   7  -2  -3  405.46   30.60
   7  -2  -3  374.36   26.60
   7   2  -3  369.26   35.00
   7   2  -3  469.85   30.00
   7   2  -3  387.96   25.00
   6  -2  -3   89.69    7.60
  -6  -2   3   93.49   10.40
   6  -2  -3   97.39    8.30
   6  -2  -3  106.79    7.60
   6  -2  -3   95.79   13.30
   6   2  -3   96.99   12.00
   6   2  -3   75.59   10.70
  -6   2   3   89.49    7.10
   6   2  -3  104.29    8.30
   6   2  -3   86.49    8.00
   5  -2  -3 1618.94   98.59
   5  -2  -3 1681.73   92.89
   5  -2  -3 1663.93   94.29
  -5  -2   3 1695.53   96.39
  -5  -2   3 1720.03   96.09
   5   2  -3 1715.13   98.39
   5   2  -3 1573.64   96.39
   5   2  -3 1979.50   94.79
   5   2  -3 1590.34   93.79
   5   2  -3 1968.80   98.39
   4  -2  -3   40.80    3.70
   4  -2  -3   43.80    4.50
   4  -2  -3   48.20    5.60
   4  -2  -3   40.30    7.60
  -4  -2   3   49.30    6.30
  -4  -2   3   42.70    6.90
   4   2  -3   38.80    5.40
  -4   2   3   41.90    4.10
   4   2  -3   56.19    7.20
   4   2  -3   72.79    8.10
   4   2  -3   48.70    5.20
  -4   2   3   50.19    5.90
   4   2  -3   54.79    7.80
   3  -2  -3  333.87   18.90
  -3  -2   3  299.77   21.30
   3  -2  -3  316.17   23.20
   3  -2  -3  333.17   23.40
  -3  -2   3  299.37   21.90
   3  -2  -3  346.67   20.20
  -3  -2   3  346.07   21.50
  -3  -2   3  329.17   20.90
   3  -2  -3  320.97   21.10
  -3  -2   3  386.16   21.00
  -3   2   3  348.97   20.10
   3   2  -3  377.36   21.50
   3   2  -3  351.26   20.30
   3   2  -3  387.06   23.50
   3   2  -3  299.47   21.20
  -3   2   3  389.96   25.20
   3   2  -3  338.97   21.70
  -3   2   3  324.97   21.20
  -2  -2   3  778.32   48.70
   2  -2  -3  852.21   49.90
   2  -2  -3  850.71   47.80
  -2  -2   3  803.72   48.30
   2  -2  -3  844.32   48.40
  -2  -2   3  854.61   48.70
   2  -2  -3  856.31   49.80
  -2  -2   3  825.92   47.50
  -2  -2   3  880.91   47.50
   2   2  -3  823.72   48.10
   2   2  -3  906.31   49.70
  -2   2   3  883.21   50.39
  -2   2   3  892.41   46.00
   2   2  -3  847.22   47.50
  -2   2   3  874.41   48.70
  -2   2   3  861.61   47.50
   2   2  -3  861.61   48.30
   2   2  -3  840.12   48.40
  -1  -2   3  556.34   32.50
   1  -2  -3  595.54   34.30
   1  -2  -3  657.53   35.80
  -1  -2   3  527.95   33.90
  -1  -2   3  545.95   33.70
   1  -2  -3  610.04   33.80
  -1  -2   3  545.05   33.00
   1  -2  -3  661.03   34.20
  -1  -2   3  561.24   33.60
   1  -2  -3  569.34   33.90
   1   2  -3  562.04   33.10
  -1   2   3  596.14   34.50
   1   2  -3  578.74   33.60
   1   2  -3  531.95   34.20
  -1   2   3  560.14   34.80
  -1   2   3  630.04   34.80
  -1   2   3  575.94   32.40
   1   2  -3  578.34   33.40
  -1   2   3  576.64   33.50
   0  -2  -3 3381.56  180.48
   0  -2  -3 3305.17  181.58
   0  -2   3 3597.54  179.98
   0  -2  -3 3299.77  179.88
   0  -2   3 3510.95  179.88
   0  -2  -3 2992.90  178.78
   0  -2   3 3259.27  178.28
   0  -2  -3 3224.38  179.58
   0  -2   3 3380.76  179.38
   0   2  -3 3308.37  178.58
   0   2   3 3363.46  179.38
   0   2   3 3453.85  179.88
   0   2  -3 3135.59  179.78
   0   2   3 3282.57  181.58
   0   2  -3 3013.90  177.88
   0   2  -3 3256.07  179.08
   0   2   3 3415.36  179.88
   0   2  -3 3506.65  179.08
   0   2   3 3661.93  180.88
  -1  -2  -3 4063.99  204.18
   1  -2   3 3907.51  202.28
  -1  -2  -3 3700.13  203.38
   1  -2   3 3777.12  203.28
  -1  -2  -3 3697.23  204.68
   1  -2   3 3730.33  202.58
   1  -2   3 3913.71  203.68
   1  -2   3 3897.01  202.38
  -1  -2  -3 3639.84  206.48
  -1  -2  -3 3665.83  202.38
  -1   2  -3 3851.81  203.58
   1   2   3 3755.92  203.88
   1   2   3 3792.02  204.88
  -1   2  -3 3630.54  202.08
   1   2   3 3597.74  206.08
   1   2   3 4017.80  202.78
  -1   2  -3 3942.51  203.38
   1   2   3 3811.62  203.98
  -1   2  -3 3414.36  202.58
   2  -2   3   32.20    4.50
  -2  -2  -3   28.90    4.80
  -2  -2  -3   30.30    5.70
   2  -2   3   36.40    5.00
  -2  -2  -3   40.80    5.30
   2  -2   3   45.90    5.70
   2  -2   3   36.80    3.60
  -2  -2  -3   40.40    8.50
  -2   2  -3   36.20    3.50
  -2   2  -3   37.00    4.80
   2   2   3   42.50    7.70
   2   2   3   33.70    5.30
  -2   2  -3   47.90    5.00
   2   2   3   31.10    5.90
   2   2   3   33.30    5.00
   2   2   3   37.70    4.20
   3  -2   3 2118.89  113.19
  -3  -2  -3 1945.81  117.19
  -3  -2  -3 2125.89  114.49
   3  -2   3 2018.70  116.29
   3  -2   3 2132.79  112.09
  -3  -2  -3 2039.90  114.59
   3  -2   3 2096.09  114.99
   3   2   3 2169.58  113.29
   3   2   3 2043.80  119.89
   3   2   3 2224.18  115.99
  -3   2  -3 2085.89  113.39
  -3   2  -3 2165.78  112.09
   3   2   3 2021.80  116.19
   3   2   3 2056.59  114.69
  -4  -2  -3  235.58   15.80
   4  -2   3  262.27   15.70
   4  -2   3  284.17   20.40
   4  -2   3  227.48   13.50
   4  -2   3  226.88   16.80
   4   2   3  233.48   15.90
   4   2   3  225.28   17.60
   4   2   3  234.98   15.30
   4   2   3  236.48   22.30
   5  -2   3  276.97   17.80
   5  -2   3  238.68   18.70
   5  -2   3  244.28   22.30
   5   2   3  283.07   17.40
   5   2   3  255.37   16.90
   5   2   3  269.47   26.20
   5   2   3  235.48   19.70
   5   2   3  286.07   18.70
   6  -2   3  145.79   19.90
   6  -2   3  138.89   18.60
   6  -2   3  150.88   12.70
   6  -2   3  146.79   13.70
   6   2   3  181.68   23.80
   6   2   3  156.68   10.60
   6   2   3  167.08   15.30
   7  -2   3  131.99   18.50
   7  -2   3  130.49   12.60
   7  -2   3  144.59   19.70
   7  -2   3  155.88   14.00
   7   2   3  114.59   14.80
   7   2   3  130.29   20.80
   8  -3  -3    9.80    7.90
   8  -3  -3    9.60    4.80
   8   3  -3    5.50    9.60
   8   3  -3    3.70    6.10
   8   3  -3    9.00    6.10
   7  -3  -3  213.68   23.80
   7  -3  -3  240.58   15.40
   7   3  -3  258.97   21.40
   7   3  -3  266.37   22.00
   7   3  -3  277.47   27.90
   6  -3  -3 1225.58   67.99
   6  -3  -3 1229.78   67.29
   6  -3  -3 1403.86   76.89
   6  -3  -3 1361.56   76.69
  -6  -3   3 1315.57   72.69
   6   3  -3 1123.49   78.09
   6   3  -3 1161.68   73.09
   6   3  -3 1152.48   72.69
   6   3  -3 1176.48   67.49
  -5  -3   3  616.94   36.50
   5  -3  -3  592.94   41.10
   5  -3  -3  610.84   37.30
   5  -3  -3  606.84   35.10
  -5  -3   3  598.74   39.00
   5   3  -3  636.54   43.90
  -5   3   3  636.34   34.80
   5   3  -3  625.34   40.40
   5   3  -3  605.34   39.10
   5   3  -3  626.24   34.90
   5   3  -3  616.54   37.30
   4  -3  -3 1348.67   70.09
  -4  -3   3 1273.87   70.19
  -4  -3   3 1293.67   73.59
   4  -3  -3 1267.97   69.39
   4  -3  -3 1211.48   74.89
   4  -3  -3 1189.78   71.59
   4   3  -3 1235.18   71.89
   4   3  -3 1248.88   73.09
  -4   3   3 1244.98   69.59
   4   3  -3 1413.16   75.19
   4   3  -3 1254.67   69.39
   3  -3  -3  448.46   30.00
  -3  -3   3  430.76   25.70
   3  -3  -3  428.26   26.40
  -3  -3   3  437.76   27.00
   3  -3  -3  440.56   25.30
   3  -3  -3  484.35   29.70
  -3  -3   3  427.46   28.80
   3  -3  -3  439.46   28.00
  -3  -3   3  416.26   28.20
  -3   3   3  458.75   28.30
   3   3  -3  480.95   28.80
   3   3  -3  419.86   27.80
   3   3  -3  430.56   29.60
  -3   3   3  463.75   24.60
  -3   3   3  441.46   26.30
   3   3  -3  421.46   28.10
  -2  -3   3   24.50    5.50
   2  -3  -3   18.40    4.20
   2  -3  -3   22.50    5.40
  -2  -3   3   27.70    3.70
  -2  -3   3   24.30    5.40
  -2  -3   3   17.80    3.60
   2  -3  -3   21.80    3.30
   2  -3  -3   23.60    5.10
  -2  -3   3   31.30    6.00
   2  -3  -3   24.40    4.90
   2   3  -3   26.80    5.10
   2   3  -3   20.30    4.30
  -2   3   3   24.20    5.30
   2   3  -3   26.60    6.20
  -2   3   3   22.20    5.20
  -2   3   3   21.40    6.00
   2   3  -3   25.00    5.00
  -2   3   3   30.20    3.50
  -2   3   3   32.10    4.90
   1  -3  -3  229.78   15.90
   1  -3  -3  212.88   15.60
   1  -3  -3  221.48   15.70
  -1  -3   3  213.48   15.60
  -1  -3   3  215.48   14.40
  -1  -3   3  239.48   16.20
   1  -3  -3  201.78   16.20
  -1  -3   3  195.28   15.80
   1  -3  -3  253.67   17.00
  -1   3   3  219.58   16.40
   1   3  -3  205.48   15.00
   1   3  -3  200.18   15.10
  -1   3   3  226.08   14.30
  -1   3   3  226.08   16.80
  -1   3   3  220.28   15.60
   1   3  -3  196.38   14.70
   1   3  -3  197.08   16.30
  -1   3   3  222.88   16.50
   0  -3  -3  371.76   25.90
   0  -3  -3  392.06   25.00
   0  -3  -3  373.46   23.10
   0  -3   3  419.46   24.70
   0  -3   3  369.56   23.10
   0  -3  -3  368.66   25.30
   0  -3   3  340.07   24.30
   0  -3  -3  426.16   24.80
   0  -3   3  358.96   24.00
   0   3  -3  382.86   20.90
   0   3   3  389.46   25.80
   0   3   3  380.56   26.00
   0   3   3  419.86   23.90
   0   3   3  398.36   24.10
   0   3   3  352.06   24.40
   0   3   3  377.26   24.60
   0   3  -3  367.86   24.90
   0   3  -3  367.76   23.30
   0   3  -3  372.46   23.60
   0   3  -3  360.36   23.30
   0   3  -3  391.26   21.10
  -1  -3  -3  487.45   31.20
  -1  -3  -3  488.55   32.40
   1  -3   3  532.95   30.60
  -1  -3  -3  611.84   35.00
  -1  -3  -3  506.95   29.10
  -1  -3  -3  505.55   32.10
   1  -3   3  505.55   31.00
   1  -3   3  564.14   30.30
   1  -3   3  488.95   31.00
   1   3   3  489.75   31.60
   1   3   3  504.65   29.80
  -1   3  -3  471.05   30.00
  -1   3  -3  485.25   31.50
  -1   3  -3  511.95   30.00
   1   3   3  583.34   34.60
   1   3   3  447.86   31.10
   1   3   3  483.45   32.80
   2  -3   3  546.85   32.20
   2  -3   3  517.95   31.40
   2  -3   3  516.45   30.40
   2  -3   3  507.25   30.90
  -2  -3  -3  504.45   32.80
  -2  -3  -3  509.75   31.80
   2  -3   3  520.65   30.00
  -2   3  -3  545.75   32.10
   2   3   3  553.94   33.10
  -2   3  -3  527.65   29.90
   2   3   3  546.55   34.10
   2   3   3  501.65   32.50
   2   3   3  517.05   29.80
   2   3   3  493.35   35.40
  -3  -3  -3  286.67   20.30
   3  -3   3  286.67   19.90
   3  -3   3  287.87   18.50
   3  -3   3  285.57   17.00
   3  -3   3  336.07   20.10
   3   3   3  290.37   20.90
   3   3   3  289.27   17.20
   3   3   3  253.67   23.50
  -3   3  -3  279.17   16.60
   3   3   3  279.57   21.70
   3   3   3  280.27   20.20
   4  -3   3  157.58   13.30
   4  -3   3  173.78   11.40
   4  -3   3  167.48   15.00
  -4  -3  -3  173.78   13.70
   4  -3   3  165.08    9.90
   4   3   3  152.28   10.70
  -4   3  -3  171.58   10.80
   4   3   3  190.38   14.30
  -4   3  -3  170.18    9.70
   4   3   3  178.98   18.70
   4   3   3  158.28   14.30
   5  -3   3   46.70    6.20
   5  -3   3   41.30    8.70
   5  -3   3   44.50    7.50
   5   3   3   35.80    5.50
   5   3   3   44.60   10.70
   5   3   3   40.90    6.50
   5   3   3   34.40    7.50
   6  -3   3  230.48   26.40
   6  -3   3  208.98   20.20
   6  -3   3  184.48   16.50
   6  -3   3  211.58   15.50
   6   3   3  192.58   14.70
   6   3   3  188.38   18.40
   6   3   3  213.38   25.60
   7  -3   3  136.49   20.40
   7  -3   3  168.98   16.40
   7  -3   3  123.29   18.30
   7  -3   3  144.99   13.20
   7   3   3  144.89   17.80
   7   3   3  148.89   11.00
   7   3   3  146.09   22.10
   8  -4  -3   60.49   12.60
   8   4  -3   51.69   15.80
   8   4  -3   37.80    9.20
   8   4  -3   56.09   11.80
   7  -4  -3  140.49   18.90
   7  -4  -3  123.79    8.90
   7   4  -3  147.59   22.00
   7   4  -3  118.99   16.30
   7   4  -3  145.29   17.50
   6  -4  -3  190.88   13.50
   6  -4  -3  178.88   20.90
   6  -4  -3  181.38   12.30
   6   4  -3  182.28   18.10
   6   4  -3  205.58   24.30
   6   4  -3  216.78   21.40
   5  -4  -3 1012.70   62.49
  -5  -4   3 1017.30   54.19
  -5  -4   3  953.20   59.39
   5  -4  -3 1016.70   57.89
   5  -4  -3  925.61   54.49
   5   4  -3 1037.30   57.89
  -5   4   3  974.50   54.09
   5   4  -3  906.41   62.49
   5   4  -3  922.61   58.69
   5   4  -3  936.81   60.29
   4  -4  -3   62.39    6.90
   4  -4  -3   51.29    9.70
  -4  -4   3   55.29    5.30
  -4  -4   3   72.19   10.10
   4  -4  -3   50.69    8.50
   4  -4  -3   54.59    5.80
   4   4  -3   73.49   12.20
   4   4  -3   56.59    8.80
   4   4  -3   41.80    8.50
   4   4  -3   60.49    8.50
  -4   4   3   58.19    4.60
  -4   4   3   64.29    6.60
  -3  -4   3  530.95   36.30
  -3  -4   3  554.04   32.00
   3  -4  -3  582.24   37.90
   3  -4  -3  548.65   35.90
   3  -4  -3  516.55   34.00
   3  -4  -3  609.34   36.80
  -3  -4   3  537.15   35.60
   3  -4  -3  521.65   32.60
   3   4  -3  513.25   35.10
   3   4  -3  647.14   38.90
  -3   4   3  609.44   34.10
  -3   4   3  584.74   32.00
   3   4  -3  626.94   38.20
   3   4  -3  536.75   35.60
   2  -4  -3   86.39    9.60
   2  -4  -3   81.29   10.40
   2  -4  -3   70.89    9.90
  -2  -4   3  104.19    9.10
  -2  -4   3   66.49    9.90
  -2  -4   3  101.49   11.00
   2  -4  -3   84.79   10.40
   2  -4  -3   75.99    7.20
  -2  -4   3   89.19    7.30
  -2   4   3   89.89    7.50
   2   4  -3   67.69   10.70
  -2   4   3   92.89   10.00
  -2   4   3   85.29   10.50
   2   4  -3   85.89   10.60
   2   4  -3  104.29   10.70
   2   4  -3   88.29   10.50
   1  -4  -3   27.80    6.30
  -1  -4   3   24.50    5.90
   1  -4  -3   17.40    5.80
   1  -4  -3   27.80    5.60
  -1  -4   3   20.00    5.00
   1  -4  -3   26.10    6.00
  -1  -4   3   34.50    6.80
   1  -4  -3   27.60    6.40
  -1  -4   3   31.40    5.30
  -1   4   3   37.80    7.10
   1   4  -3   27.70    5.10
   1   4  -3   32.60    6.30
   1   4  -3   30.10    5.60
  -1   4   3   22.50    5.60
  -1   4   3   22.20    5.90
  -1   4   3   22.90    6.40
   1   4  -3   39.60    7.90
   1   4  -3   26.90    4.50
  -1   4   3   26.70    4.90
   0  -4  -3 1700.73   96.59
   0  -4   3 1607.04   95.59
   0  -4   3 1773.72   94.79
   0  -4   3 1914.41   96.49
   0  -4  -3 1710.73   95.99
   0  -4  -3 1763.02   97.89
   0  -4   3 1594.14   95.89
   0  -4  -3 1712.73   97.69
   0  -4  -3 1771.22   94.39
   0   4  -3 1598.64   95.19
   0   4  -3 1764.42   97.49
   0   4   3 1714.03   97.39
   0   4   3 1601.24   96.09
   0   4  -3 1719.63   91.29
   0   4   3 1684.63   97.59
   0   4   3 1709.43   95.09
   0   4  -3 1807.32   95.19
   0   4   3 1617.44   95.99
   0   4   3 1659.53   95.49
   0   4  -3 1682.63   94.99
  -1  -4  -3  741.63   40.40
   1  -4   3  709.43   43.00
   1  -4   3  718.63   42.70
  -1  -4  -3  667.63   43.40
  -1  -4  -3  700.13   43.30
   1  -4   3  722.03   43.20
   1  -4   3  739.43   42.00
   1   4   3  691.73   43.30
  -1   4  -3  705.03   43.60
   1   4   3  673.43   44.60
   1   4   3  694.43   45.30
   1   4   3  741.93   41.70
   1   4   3  670.63   43.60
   1   4   3  741.13   44.80
   2  -4   3   94.29    9.90
  -2  -4  -3   89.19    6.50
   2  -4   3   81.39    8.80
   2  -4   3   81.99    5.20
   2  -4   3   89.49    5.30
   2  -4   3   89.79   10.40
  -2  -4  -3   99.89   11.20
   2  -4   3   97.59    8.80
   2   4   3   79.09   11.70
   2   4   3   88.69    7.40
   2   4   3  117.29   12.20
   2   4   3   85.59   10.70
   2   4   3   92.99   13.10
  -2   4  -3   86.09   10.10
   3  -4   3  508.85   29.70
   3  -4   3  496.55   30.90
   3  -4   3  513.05   29.50
   3  -4   3  506.15   31.90
  -3  -4  -3  472.85   32.50
   3   4   3  487.15   28.10
   3   4   3  434.76   31.90
   3   4   3  485.05   36.60
   3   4   3  485.25   34.50
   3   4   3  514.25   33.00
  -3   4  -3  509.05   31.20
   4  -4   3  347.37   19.30
  -4  -4  -3  316.27   23.70
   4  -4   3  323.17   23.40
   4  -4   3  353.76   21.50
   4  -4   3  307.77   22.60
   4   4   3  346.57   24.60
  -4   4  -3  341.77   20.80
   4   4   3  283.27   23.20
   4   4   3  309.37   18.10
   4   4   3  340.67   25.20
   4   4   3  294.27   28.20
   5  -4   3   87.39   11.10
   5  -4   3   72.79   14.70
   5  -4   3   78.79   11.10
   5  -4   3   78.09    5.20
   5   4   3   78.29   15.20
   5   4   3   61.79    9.40
   5   4   3   68.99   11.00
   6  -4   3   33.60    8.40
   6  -4   3   27.10    9.50
   6  -4   3   27.10    5.30
   6  -4   3   17.60    6.00
   6   4   3   18.20    5.50
   6   4   3   14.90   10.00
   6   4   3   25.00    7.70
   7  -4   3  206.78   18.10
   7  -4   3  146.49   22.80
   7   4   3  197.88   15.00
   7   4   3  210.58   28.40
   7   4   3  173.48   20.10
   8  -5  -3  224.78   25.10
   8   5  -3  131.89   24.60
   8   5  -3  207.98   28.90
   8   5  -3  209.98   22.70
   7  -5  -3  230.78   15.10
   7  -5  -3  238.38   26.80
   7   5  -3  272.17   24.30
   7   5  -3  258.47   23.50
   7   5  -3  251.87   30.40
   6  -5  -3   65.99    6.80
  -6  -5   3   74.79   15.40
   6  -5  -3   73.49   14.50
   6   5  -3   67.39   11.70
   6   5  -3   81.79   14.10
   6   5  -3   78.19   15.70
   5  -5  -3  385.86   25.20
   5  -5  -3  397.96   32.30
   5  -5  -3  382.86   25.30
  -5   5   3  474.55   25.60
   5   5  -3  346.57   32.10
   5   5  -3  452.75   33.20
   5   5  -3  400.16   30.30
   4  -5  -3  371.56   25.00
   4  -5  -3  351.66   23.80
  -4  -5   3  349.27   28.10
   4  -5  -3  396.06   27.60
   4  -5  -3  340.47   29.40
  -4  -5   3  381.26   22.10
  -4   5   3  396.86   24.70
   4   5  -3  333.17   28.90
   4   5  -3  387.46   27.80
  -4   5   3  406.56   22.50
   4   5  -3  404.56   30.40
   3  -5  -3  367.96   25.10
  -3  -5   3  322.07   24.60
  -3  -5   3  304.77   23.60
   3  -5  -3  288.47   25.20
   3  -5  -3  298.67   20.80
   3  -5  -3  305.97   22.20
   3   5  -3  322.27   26.10
   3   5  -3  317.17   24.00
  -3   5   3  317.97   21.80
  -3   5   3  343.97   20.00
   3   5  -3  309.17   24.60
   2  -5  -3 1571.74   91.09
   2  -5  -3 1765.02   92.79
  -2  -5   3 1575.94   87.79
   2  -5  -3 1805.42   93.39
   2  -5  -3 1503.45   88.39
  -2  -5   3 1472.05   91.69
  -2  -5   3 1738.03   92.29
   2  -5  -3 1585.34   91.39
  -2   5   3 1624.84   90.69
   2   5  -3 1615.74   93.79
   2   5  -3 1492.15   90.69
  -2   5   3 1535.15   90.99
   2   5  -3 1570.24   90.69
  -2   5   3 1534.45   88.29
   1  -5  -3  902.51   53.39
  -1  -5   3  852.61   53.49
   1  -5  -3  841.92   53.79
   1  -5  -3 1085.49   55.79
   1  -5  -3  842.02   54.79
  -1  -5   3  859.11   54.09
   1  -5  -3  885.91   51.49
   1   5  -3  833.42   52.69
  -1   5   3  926.81   54.29
  -1   5   3  973.60   55.79
  -1   5   3  911.51   54.39
   1   5  -3  820.52   55.29
   1   5  -3  836.22   50.89
  -1   5   3  911.21   52.19
   0  -5   3  413.16   29.10
   0  -5   3  464.25   30.80
   0  -5   3  423.56   30.30
   0  -5  -3  447.06   31.30
   0  -5   3  432.76   30.90
   0  -5  -3  495.75   29.30
   0   5   3  455.65   31.30
   0   5  -3  461.05   25.60
   0   5   3  466.85   31.00
   0   5  -3  467.45   29.80
   0   5   3  489.15   30.60
   0   5   3  476.45   31.80
   0   5  -3  431.16   31.60
   1  -5   3  149.29   13.40
   1  -5   3  165.48   14.10
   1  -5   3  133.49   13.90
   1  -5   3  146.99   12.60
  -1  -5  -3  168.88   16.80
  -1  -5  -3  140.39   10.50
   1   5   3  118.69   14.50
   1   5   3  154.58   14.50
  -1   5  -3  154.28   15.90
   1   5   3  123.09   11.80
   1   5   3  150.68   15.70
   2  -5   3  232.58   18.40
  -2  -5  -3  246.38   14.70
   2  -5   3  246.88   18.20
   2  -5   3  220.48   17.70
  -2  -5  -3  222.18   19.40
  -2   5  -3  253.17   19.40
   2   5   3  222.98   20.70
   2   5   3  236.28   19.80
   2   5   3  220.38   19.30
   2   5   3  246.38   16.20
  -3  -5  -3  755.92   50.99
   3  -5   3  838.52   45.00
   3  -5   3  738.73   49.60
   3  -5   3  819.52   48.00
   3  -5   3  839.92   45.20
   3  -5   3  833.22   50.19
   3   5   3  790.42   50.99
   3   5   3  820.12   51.69
  -3   5  -3  885.41   49.90
   3   5   3  784.02   54.69
   4  -5   3  269.37   19.80
   4  -5   3  280.77   21.60
   4  -5   3  266.47   18.60
  -4  -5  -3  246.88   21.50
   4   5   3  281.47   23.10
   4   5   3  304.97   27.70
   4   5   3  265.77   21.70
   5  -5   3  189.58   24.30
   5  -5   3  159.48   17.00
   5  -5   3  170.38   12.50
   5   5   3  193.48   17.10
   5   5   3  157.68   22.40
   5   5   3  159.28   18.70
   6  -5   3   83.29   18.00
   6  -5   3  103.39   13.30
   6   5   3  102.19   15.40
   6   5   3  102.59   18.70
   6   5   3   99.59   12.60
   7  -5   3   72.99   16.50
   7  -5   3   75.19   11.50
   7   5   3   72.19   10.20
   7   5   3   92.69   14.80
   7  -6  -3  171.88   22.60
   7   6  -3  163.88   24.40
   7   6  -3  230.98   25.10
   6  -6  -3   36.90   11.00
   6  -6  -3   29.70    5.20
   6   6  -3   32.90    8.30
   6   6  -3   30.00   10.40
   5  -6  -3    4.60    5.40
   5  -6  -3   11.80    4.10
   5  -6  -3    5.90    3.30
  -5  -6   3   18.20    7.50
   5   6  -3   27.00   10.10
   5   6  -3   23.90    9.00
   5   6  -3   19.90    7.40
  -4  -6   3  542.65   36.60
   4  -6  -3  545.75   34.70
   4  -6  -3  526.95   33.30
   4  -6  -3  485.05   39.00
   4   6  -3  510.75   38.50
  -4   6   3  525.75   33.70
  -4   6   3  548.95   31.50
   4   6  -3  538.95   40.00
   4   6  -3  564.54   37.80
   3  -6  -3  261.77   23.00
  -3  -6   3  233.28   20.40
   3  -6  -3  275.07   18.60
  -3  -6   3  207.98   20.60
   3  -6  -3  251.47   20.10
   3  -6  -3  247.28   22.30
  -3  -6   3  268.27   16.10
   3   6  -3  239.18   21.20
   3   6  -3  231.48   20.90
   3   6  -3  285.37   25.30
  -3   6   3  253.07   19.50
  -3   6   3  229.68   16.90
   2  -6  -3    9.90    4.20
  -2  -6   3   10.10    6.00
  -2  -6   3    7.70    4.50
   2  -6  -3    9.10    4.50
   2  -6  -3    4.60    5.30
   2   6  -3    4.00    3.60
  -2   6   3   13.80    5.70
   2   6  -3    5.90    5.20
   2   6  -3    6.00    4.50
  -2   6   3    7.50    3.80
  -1  -6   3  381.46   28.50
  -1  -6   3  348.07   27.50
   1  -6  -3  387.26   25.70
   1  -6  -3  358.96   28.10
   1  -6  -3  419.76   27.90
   1   6  -3  381.96   25.00
   1   6  -3  361.46   30.20
  -1   6   3  358.96   27.70
   1   6  -3  434.46   28.50
  -1   6   3  455.95   29.50
   0  -6  -3   29.70    7.40
   0  -6   3   11.40    5.40
   0  -6  -3   17.90    4.80
   0   6   3   18.10    5.80
   0   6   3   24.70    6.60
   0   6  -3   15.00    2.50
   0   6  -3   22.50    6.20
   0   6  -3   18.90    6.50
   0   6   3   12.40    5.90
   0   6   3   15.30    5.70
  -1  -6  -3  140.09   16.50
   1  -6   3  136.49   14.60
  -1  -6  -3  116.89   10.00
   1  -6   3  105.59   13.10
  -1   6  -3  142.19   16.30
   1   6   3  120.69   15.10
   1   6   3  133.09   15.60
   1   6   3  117.69   15.30
  -2  -6  -3   19.50    7.50
   2  -6   3   19.10    7.00
   2  -6   3   14.10    5.80
   2  -6   3   21.40    6.70
  -2  -6  -3   16.90    3.10
  -2   6  -3   18.90    6.30
   2   6   3   28.80    8.30
   2   6   3   15.60    6.60
   2   6   3   11.20    6.60
   3  -6   3  461.25   34.10
  -3  -6  -3  480.45   36.00
   3  -6   3  496.75   35.10
   3   6   3  503.05   36.40
   3   6   3  537.45   37.00
   3   6   3  517.65   39.00
  -3   6  -3  595.94   35.60
  -4  -6  -3  292.77   25.70
   4  -6   3  334.17   25.10
   4  -6   3  311.07   24.10
   4  -6   3  316.17   30.60
   4   6   3  325.07   30.90
   4   6   3  393.76   28.10
   4   6   3  353.46   27.30
   5  -6   3   76.89   16.50
   5  -6   3   71.59    9.00
   5  -6   3   98.29   13.10
   5   6   3  100.09   17.90
   5   6   3   84.09   13.60
   5   6   3   70.19   12.20
   6  -6   3   85.59   18.40
   6  -6   3  105.99   14.30
   6   6   3   85.49   12.90
   6   6   3  128.29   23.10
   6   6   3  101.29   15.90
   7  -7  -3  195.18   14.20
   7   7  -3  203.48   28.60
   6  -7  -3  110.89   10.50
   6  -7  -3  101.79   18.00
   6   7  -3  118.39   17.20
   6   7  -3  112.89   19.20
   6   7  -3  101.69   17.00
   5  -7  -3  134.69   14.30
   5  -7  -3  194.18   23.10
  -5  -7   3  128.19   19.60
   5   7  -3  136.19   19.70
   5   7  -3  158.58   19.30
   5   7  -3  146.39   20.90
   4  -7  -3   92.39   12.60
  -4  -7   3  105.29   17.40
   4  -7  -3  100.99   16.00
   4  -7  -3  100.99   11.50
  -4  -7   3  118.19   14.90
   4   7  -3  108.09   15.30
   4   7  -3  106.19   16.10
   4   7  -3  123.69   18.60
  -4   7   3  107.29   12.70
   3  -7  -3  529.05   37.80
   3  -7  -3  575.94   36.40
  -3  -7   3  534.35   42.10
  -3  -7   3  568.54   39.90
   3  -7  -3  642.34   42.40
   3   7  -3  456.55   41.10
  -3   7   3  663.23   39.00
   3   7  -3  591.74   39.50
   3   7  -3  551.94   39.80
  -2  -7   3  355.36   27.70
   2  -7  -3  279.87   24.10
   2  -7  -3  272.87   23.90
   2  -7  -3  297.07   21.70
  -2  -7   3  259.87   24.00
  -2   7   3  293.87   23.50
   2   7  -3  262.77   23.40
   2   7  -3  306.27   22.90
   2   7  -3  309.07   27.50
  -2   7   3  298.37   23.20
   1  -7  -3  191.08   19.40
   1  -7  -3  228.18   18.40
   1  -7  -3  223.08   19.70
  -1  -7   3  177.78   22.70
  -1  -7   3  249.97   21.50
   1   7  -3  255.57   17.30
   1   7  -3  232.48   20.70
  -1   7   3  222.68   20.80
  -1   7   3  249.97   20.90
   1   7  -3  241.08   25.20
   0  -7  -3  161.08   14.50
   0  -7  -3  178.98   19.50
   0  -7   3  129.89   16.20
   0  -7   3  179.38   21.10
   0   7  -3  160.08   19.80
   0   7   3  126.69   16.50
   0   7   3  150.58   17.60
   0   7   3  204.18   18.40
   0   7  -3  156.88   10.60
   0   7  -3  162.28   15.80
   1  -7   3   43.50   11.20
  -1  -7  -3   32.30    9.20
   1  -7   3   44.40    9.10
  -1  -7  -3   37.50    5.90
  -1   7  -3   26.20    8.10
   1   7   3   36.00    9.50
   1   7   3   37.40   10.40
   1   7   3   28.80    9.00
   2  -7   3   82.19   12.30
   2  -7   3   72.49   12.50
  -2  -7  -3   56.69    6.00
  -2  -7  -3   68.59   12.70
   2   7   3   62.99   11.90
   2   7   3   44.90   11.20
  -2   7  -3   54.09   10.80
   2   7   3   63.69   11.60
  -3  -7  -3   43.90    9.80
   3  -7   3   47.10   12.00
   3  -7   3   48.20   10.00
   3  -7   3   41.00    9.90
   3   7   3   63.29   12.50
   3   7   3   28.10    9.50
   3   7   3   50.49   11.60
  -4  -7  -3  174.78   20.00
   4  -7   3  184.48   20.10
   4  -7   3  194.28   18.00
   4  -7   3  201.58   26.00
   4   7   3  172.58   20.70
   4   7   3  167.78   22.70
   4   7   3  188.58   21.40
   5  -7   3   73.29   10.30
   5  -7   3   84.79   17.40
   5  -7   3   73.19   12.70
   5   7   3   76.99   15.70
   5   7   3   93.39   14.20
   5   7   3   63.09   13.10
   6  -8  -3   38.90    8.10
   6   8  -3   56.49   16.30
   6   8  -3   87.79   17.30
   6   8  -3   76.59   15.90
   5  -8  -3  232.08   20.10
   5  -8  -3  211.78   26.50
  -5  -8   3  235.78   28.70
   5   8  -3  237.98   26.10
   5   8  -3  249.68   25.10
   5   8  -3  268.37   29.60
   4  -8  -3  302.17   23.70
   4  -8  -3  269.37   21.50
   4  -8  -3  280.37   27.50
  -4  -8   3  264.57   30.30
   4   8  -3  322.87   32.80
   4   8  -3  269.77   25.10
   4   8  -3  280.67   26.20
  -3  -8   3    2.60    5.80
   3  -8  -3    1.50    4.00
   3  -8  -3    6.30    6.00
  -3  -8   3    0.70    5.50
   3  -8  -3    2.00    5.30
   3   8  -3   -5.30    4.10
   3   8  -3   -3.30    4.00
  -3   8   3   -2.60    3.90
   3   8  -3   -5.10    4.80
   2  -8  -3   49.30    8.70
   2  -8  -3   42.00    9.80
   2  -8  -3   50.89   11.00
  -2  -8   3   57.59   11.00
  -2  -8   3   54.89    9.70
  -2  -8   3   52.19   13.70
   2   8  -3   57.39   13.20
  -2   8   3   47.90    9.70
   2   8  -3   37.70    9.60
  -2   8   3   49.00    9.60
   2   8  -3   62.59    9.80
   1  -8  -3   40.20   10.30
  -1  -8   3   45.90   11.70
   1  -8  -3   45.20    9.30
  -1  -8   3   60.59   11.60
  -1  -8   3   55.39   10.90
  -1   8   3   89.29   12.50
  -1   8   3   44.70   10.40
   1   8  -3   31.60    9.90
   1   8  -3   64.59   11.60
   1   8  -3   48.40    8.40
   0  -8   3  260.97   23.90
   0  -8   3  250.47   27.10
   0  -8  -3  201.18   23.40
   0  -8  -3  222.38   18.90
   0  -8   3  222.38   23.10
   0   8  -3  211.68   20.40
   0   8   3  215.98   23.60
   0   8  -3  253.67   26.70
   0   8   3  233.18   21.10
   0   8   3  259.57   22.40
   1  -8   3  569.34   40.30
  -1  -8  -3  505.55   40.90
   1  -8   3  575.64   42.80
  -1  -8  -3  580.44   35.40
   1  -8   3  561.44   42.90
   1   8   3  550.24   41.40
   1   8   3  583.64   41.50
  -1   8  -3  571.34   41.90
   1   8   3  573.94   41.40
   2  -8   3   15.40    8.50
   2  -8   3   11.20    6.60
  -2  -8  -3   11.50    7.50
   2  -8   3    6.90    7.20
   2   8   3   17.40    8.20
   2   8   3    6.70    7.40
   2   8   3    9.90    5.70
  -3  -8  -3  266.37   27.00
   3  -8   3  251.87   25.60
   3  -8   3  255.77   22.80
   3  -8   3  224.28   28.30
   3   8   3  270.77   25.00
   3   8   3  229.98   24.50
   3   8   3  219.38   24.90
   4  -8   3   -1.70    5.30
   4  -8   3    1.40    5.90
   4  -8   3    6.60    5.50
   4   8   3    0.00    6.00
   4   8   3    3.50    7.80
   4   8   3   -0.10    4.90
   5  -8   3   18.90    7.10
   5  -8   3   37.10    9.30
   5   8   3   19.80   11.30
   5   8   3   15.40    7.30
  -5  -9   3   47.80   14.30
   5  -9  -3   59.39   16.40
   5  -9  -3   22.00    7.30
   5   9  -3   39.50   10.70
   4  -9  -3   96.09   13.70
  -4  -9   3   86.49   18.10
   4  -9  -3  115.99   18.60
   4   9  -3   75.89   14.40
   4   9  -3   81.09   15.10
   4   9  -3   91.09   18.00
   3  -9  -3  156.38   19.00
   3  -9  -3  159.28   20.00
  -3  -9   3  186.08   24.50
   3  -9  -3  164.18   17.90
  -3  -9   3  178.48   20.90
   3   9  -3  173.08   23.20
   3   9  -3  152.18   20.10
   2  -9  -3  163.18   20.10
  -2  -9   3  166.88   24.30
   2  -9  -3  189.78   17.70
   2  -9  -3  213.88   22.10
  -2  -9   3  159.48   19.90
  -2   9   3  196.78   18.60
  -2   9   3  185.18   21.10
   2   9  -3  165.68   23.20
   2   9  -3  187.48   21.70
   1  -9  -3   95.29   15.30
   1  -9  -3   88.59   13.00
  -1  -9   3   98.09   14.70
  -1  -9   3   84.69   16.50
  -1  -9   3   96.49   15.10
  -1   9   3   79.79   12.80
   1   9  -3  100.89   17.40
   1   9  -3  118.89   16.60
  -1   9   3   97.79   15.30
   0  -9   3  126.19   18.00
   0  -9  -3  102.59   13.60
   0  -9   3  101.69   15.70
   0  -9   3  114.59   18.30
   0  -9  -3  118.29   17.90
   0   9   3  121.69   17.40
   0   9  -3   98.99   14.40
   0   9  -3  118.79   17.90
   0   9   3   97.79   15.30
   0   9   3  122.79   17.20
  -1  -9  -3   40.90   11.80
   1  -9   3   40.40   12.10
   1  -9   3   54.49   13.20
   1  -9   3   28.80    9.00
   1   9   3   27.50   10.10
   1   9   3   28.90   10.30
  -1   9  -3   34.90   11.30
   1   9   3   53.49   12.80
  -2  -9  -3   94.09   16.20
   2  -9   3  108.89   18.80
   2  -9   3  107.69   17.70
   2  -9   3  103.89   15.70
   2   9   3  120.69   17.80
   2   9   3  105.79   16.50
   2   9   3  109.79   17.50
   3  -9   3   27.30   12.20
  -3  -9  -3   26.10   10.90
   3  -9   3   26.20    9.70
   3  -9   3   38.30   10.30
   3   9   3   39.40   12.20
   3   9   3   44.40   11.90
   3   9   3   39.30   12.10
   4  -9   3   49.60   11.40
   4  -9   3   39.50   10.40
   4   9   3   48.40   13.30
   3 -10  -3   93.59   15.80
  -3 -10   3   94.89   18.60
   3  10  -3   88.09   16.20
   3  10  -3   86.29   19.00
  -2 -10   3   46.50   12.20
   2 -10  -3   56.19   12.70
  -2 -10   3   30.80   12.70
   2 -10  -3   46.20   11.50
   2  10  -3   39.90   13.40
   2  10  -3   15.00    7.80
  -2  10   3   52.39   12.00
   1 -10  -3   71.59   13.80
   1 -10  -3   81.59   13.40
  -1 -10   3  102.79   17.80
  -1 -10   3   80.89   14.90
   1  10  -3   81.99   14.60
  -1  10   3   76.79   14.90
   1  10  -3   89.99   17.00
   0 -10   3   21.30    9.00
   0 -10   3   13.50    7.80
   0 -10  -3   18.40    8.90
   0 -10   3    7.50    9.50
   0  10   3    5.10    8.60
   0  10  -3    2.60    4.60
   0  10   3   15.20    8.20
   0  10  -3   11.20    7.90
   1 -10   3   40.20   12.60
   1 -10   3   41.10   10.90
  -1 -10  -3   28.60    9.90
   1 -10   3   28.40   10.80
   1  10   3   41.40   11.40
   1  10   3   34.60   10.50
   1  10   3   29.90    9.40
   2 -10   3   79.19   14.60
   2 -10   3   54.79   14.30
   2 -10   3  112.69   20.80
  -2 -10  -3   47.10   11.90
   2  10   3   78.79   16.00
   2  10   3   71.79   15.20
   9   0  -4   76.69   12.70
   9   0  -4   86.89   20.10
   8   0  -4   55.09    8.00
   8   0  -4   53.59    9.50
   8   0  -4   43.10    8.70
   7   0  -4    5.00    4.50
   7   0  -4    3.50    3.60
   7   0  -4    5.20    3.90
   6   0  -4 1869.71   96.29
   6   0  -4 1637.44   96.59
   6   0  -4 1636.44   97.09
   6   0  -4 1697.03   98.19
   6   0  -4 1812.72   94.69
   5   0  -4  270.87   16.90
   5   0  -4  254.97   17.60
   5   0  -4  273.27   18.20
  -5   0   4  266.37   17.50
   5   0  -4  275.27   19.00
   5   0  -4  227.58   15.80
   4   0  -4 2567.64  131.19
   4   0  -4 2438.26  132.49
  -4   0   4 2430.16  131.29
   4   0  -4 2390.46  131.09
   4   0  -4 2489.85  133.39
   4   0  -4 2334.07  131.89
  -4   0   4 2461.35  134.89
  -4   0   4 2327.97  131.69
  -3   0   4  234.68   15.70
   3   0  -4  259.47   14.80
   3   0  -4  250.67   16.90
  -3   0   4  233.98   17.60
   3   0  -4  259.07   15.50
  -3   0   4  247.38   15.40
   3   0  -4  256.77   16.00
   2   0  -4  162.98   11.40
  -2   0   4  162.18   10.50
  -2   0   4  159.58   10.50
   2   0  -4  159.08   12.90
  -2   0   4  164.88   11.80
   2   0  -4  152.18    9.40
   2   0  -4  152.08   10.50
   2   0  -4  152.68   10.30
  -2   0   4  155.28    9.90
   1   0  -4  932.71   55.59
   1   0  -4  983.30   54.19
  -1   0   4  965.80   54.49
  -1   0   4  970.40   54.99
   1   0  -4 1082.39   57.29
   1   0  -4 1011.40   54.99
  -1   0   4 1039.50   57.19
  -1   0   4 1026.90   55.89
  -1   0   4  993.50   54.99
   1   0  -4 1004.00   55.09
   0   0   4 3233.38  165.28
   0   0  -4 3050.09  167.28
   0   0   4 3297.07  166.18
   0   0  -4 3089.49  165.08
   0   0   4 3033.70  164.98
   0   0   4 3184.58  164.98
   0   0   4 2936.11  166.88
   0   0  -4 2838.72  164.38
   0   0  -4 3126.39  165.08
   0   0  -4 2983.60  166.08
   1   0   4   85.09    8.90
   1   0   4   85.99    6.80
  -1   0  -4   83.39    5.20
  -1   0  -4   83.89    6.30
  -1   0  -4   92.29    6.80
   1   0   4   80.29    7.60
   1   0   4   78.09    6.50
   1   0   4   95.29    6.50
  -1   0  -4   78.89    8.40
   1   0   4   89.49    5.70
   2   0   4 1805.02  106.39
   2   0   4 1968.70  103.29
   2   0   4 1848.62  102.09
  -2   0  -4 1832.82  102.09
  -2   0  -4 2051.19  107.39
   2   0   4 1875.91  102.39
  -2   0  -4 1901.81  102.99
   3   0   4  194.28   13.00
   3   0   4  189.88   16.90
  -3   0  -4  198.18   17.40
  -3   0  -4  198.08   13.20
   3   0   4  187.98   13.20
   3   0   4  189.58   11.80
   4   0   4  288.47   19.40
   4   0   4  291.47   16.70
  -4   0  -4  296.77   16.80
   4   0   4  282.47   23.80
   4   0   4  279.37   18.40
  -4   0  -4  293.07   18.30
   5   0   4   26.50    5.60
   5   0   4   24.90    8.50
   5   0   4   36.10    3.00
   5   0   4   31.30    3.50
   6   0   4    5.80    6.60
   6   0   4    5.30    4.30
   6   0   4    7.00    4.10
   7   0   4  229.08   19.80
   7   0   4  249.58   28.60
   7   0   4  240.68   18.60
   9  -1  -4  132.29   16.50
   9  -1  -4  147.49   18.50
   9   1  -4  182.28   26.60
   9   1  -4  162.88   18.90
   8  -1  -4  150.98   12.10
   8  -1  -4  151.98   17.30
   8  -1  -4  158.58   15.40
   8   1  -4  137.09   14.40
   8   1  -4  156.88   17.20
   8   1  -4  146.59   17.00
   7  -1  -4  229.98   19.50
   7  -1  -4  237.58   18.00
   7  -1  -4  186.98   15.10
   7   1  -4  211.78   16.30
   7   1  -4  203.78   17.90
   7   1  -4  203.28   17.60
  -6  -1   4  577.54   36.60
   6  -1  -4  589.04   35.00
   6  -1  -4  572.24   35.50
   6  -1  -4  586.94   37.10
   6  -1  -4  626.74   39.50
   6  -1  -4  584.74   34.80
   6   1  -4  603.64   36.80
   6   1  -4  640.04   36.80
   6   1  -4  649.24   34.60
  -6   1   4  592.74   35.20
   6   1  -4  606.24   37.60
   6   1  -4  546.45   37.10
  -5  -1   4 1680.53   93.59
   5  -1  -4 1733.43   89.19
  -5  -1   4 1571.34   91.49
   5  -1  -4 1623.24   93.69
   5  -1  -4 1563.84   89.89
   5  -1  -4 1847.02   90.09
   5   1  -4 1789.32   92.49
  -5   1   4 1605.24   89.69
   5   1  -4 1471.35   91.49
   5   1  -4 1553.04   90.99
   5   1  -4 1609.14   90.99
   5   1  -4 1620.84   89.39
   4  -1  -4   19.20    2.20
  -4  -1   4   16.40    4.50
   4  -1  -4   20.30    5.30
   4  -1  -4   18.20    3.30
   4  -1  -4   22.10    3.40
  -4  -1   4   23.80    4.40
   4   1  -4   21.20    4.60
   4   1  -4   21.20    3.30
  -4   1   4   12.80    5.30
  -4   1   4   12.70    2.70
   4   1  -4   17.30    3.60
  -4   1   4   19.10    3.40
   4   1  -4   16.80    3.70
   4   1  -4   20.80    3.90
   3  -1  -4 1806.12   89.59
   3  -1  -4 1622.54   89.69
  -3  -1   4 1636.84   90.89
  -3  -1   4 1565.04   90.39
  -3  -1   4 1582.64   89.69
   3  -1  -4 1573.94   91.49
  -3  -1   4 1621.54   89.49
   3   1  -4 1539.45   89.99
   3   1  -4 1708.43   90.39
   3   1  -4 1740.63   89.89
  -3   1   4 1554.94   89.09
  -3   1   4 1539.65   89.59
  -3   1   4 1908.71   93.49
   3   1  -4 1752.02   89.49
   3   1  -4 1522.45   90.59
   2  -1  -4  420.26   25.40
  -2  -1   4  423.06   26.00
   2  -1  -4  410.06   26.40
   2  -1  -4  404.96   27.70
  -2  -1   4  480.15   26.00
   2  -1  -4  490.05   25.50
  -2  -1   4  413.16   25.80
  -2  -1   4  443.46   25.40
   2   1  -4  405.06   25.10
   2   1  -4  457.45   25.40
   2   1  -4  450.85   26.40
  -2   1   4  446.46   27.60
  -2   1   4  432.46   23.70
  -2   1   4  441.56   25.80
   2   1  -4  449.76   25.20
  -2   1   4  434.46   25.20
   2   1  -4  397.06   25.60
  -1  -1   4 2304.07  114.69
   1  -1  -4 2123.69  114.29
   1  -1  -4 2031.20  114.59
   1  -1  -4 2111.29  113.89
  -1  -1   4 2272.87  114.39
  -1  -1   4 2092.29  113.79
  -1  -1   4 2016.60  114.09
   1   1  -4 2001.60  113.49
  -1   1   4 1987.40  116.09
  -1   1   4 2108.59  114.99
   1   1  -4 1971.80  112.99
   1   1  -4 2090.09  113.59
  -1   1   4 2106.99  113.79
   1   1  -4 2024.90  114.59
   1   1  -4 2439.96  114.89
   1   1  -4 1994.20  114.79
  -1   1   4 2155.48  114.49
   0  -1  -4 2663.73  144.99
   0  -1   4 2630.64  144.29
   0  -1   4 2561.74  144.49
   0  -1  -4 2733.53  144.29
   0  -1   4 2687.63  145.19
   0  -1  -4 2639.44  144.29
   0  -1   4 2913.91  145.29
   0  -1   4 2660.13  143.99
   0  -1  -4 2432.56  144.69
   0   1  -4 2662.43  143.29
   0   1  -4 2599.94  145.19
   0   1   4 2696.13  144.89
   0   1  -4 2667.93  143.99
   0   1  -4 2667.93  143.89
   0   1   4 2509.85  144.19
   0   1   4 2762.72  145.29
   0   1  -4 2776.22  144.59
   0   1   4 2980.40  147.69
   1  -1   4 1925.11  105.79
   1  -1   4 1904.41  106.69
  -1  -1  -4 2004.50  104.89
   1  -1   4 1926.61  103.19
   1  -1   4 1949.51  103.29
  -1  -1  -4 1971.70  106.29
  -1  -1  -4 1865.71  105.09
  -1  -1  -4 2151.78  109.49
   1  -1   4 1998.60  104.79
   1  -1   4 1921.91  104.99
   1   1   4 2016.90  105.29
  -1   1  -4 1853.41  104.49
   1   1   4 1821.52  108.39
  -1   1  -4 1987.80  105.19
   1   1   4 2044.20  105.79
  -1   1  -4 1875.61  106.69
   1   1   4 1813.52  105.09
   1   1   4 1915.71  106.29
  -2  -1  -4  332.37   19.70
  -2  -1  -4  318.47   19.90
  -2  -1  -4  396.86   25.80
   2  -1   4  315.07   19.50
  -2  -1  -4  349.27   21.50
   2  -1   4  317.77   19.40
   2  -1   4  323.77   22.50
   2  -1   4  323.77   18.90
   2  -1   4  359.86   21.20
  -2   1  -4  338.57   22.80
  -2   1  -4  319.87   19.80
   2   1   4  307.17   20.50
   2   1   4  382.36   22.10
   2   1   4  348.87   20.80
  -2   1  -4  347.07   19.60
   2   1   4  326.37   24.50
   2   1   4  331.77   20.00
   3  -1   4  603.14   34.00
  -3  -1  -4  642.14   36.30
   3  -1   4  613.04   33.80
   3  -1   4  536.95   37.70
   3  -1   4  576.84   35.60
   3  -1   4  591.64   34.10
  -3  -1  -4  585.94   33.90
  -3  -1  -4  570.24   34.20
  -3   1  -4  624.04   34.00
   3   1   4  569.94   36.10
   3   1   4  582.44   39.80
   3   1   4  608.54   35.70
  -3   1  -4  660.23   34.10
   3   1   4  602.44   35.50
   3   1   4  630.14   34.30
   4  -1   4  177.48   11.40
   4  -1   4  218.78   18.10
   4  -1   4  196.68   14.10
   4  -1   4  185.88   12.00
   4  -1   4  190.28   13.20
   4   1   4  177.98   11.80
   4   1   4  171.78   13.90
  -4   1  -4  181.48   11.60
   4   1   4  167.08   18.00
   4   1   4  185.28   14.10
   4   1   4  197.88   14.60
  -4   1  -4  190.68   11.50
   5  -1   4  264.97   18.60
   5  -1   4  283.17   18.00
   5  -1   4  221.58   22.20
   5   1   4  211.18   23.40
   5   1   4  248.08   15.10
   5   1   4  272.27   19.20
   6  -1   4  266.87   21.00
   6  -1   4  315.77   21.70
   6  -1   4  340.97   28.40
   6   1   4  267.97   27.00
   6   1   4  344.57   23.20
   6   1   4  294.97   16.90
   7  -1   4   65.29   14.00
   7  -1   4   43.70    7.70
   7  -1   4   33.20    7.00
   7  -1   4   53.49   12.90
   7   1   4   45.50    9.00
   7   1   4   58.29   14.80
   9  -2  -4   89.79   14.80
   9  -2  -4   86.19   14.50
   8  -2  -4  615.34   41.30
   8  -2  -4  599.84   44.40
   8   2  -4  676.83   42.60
   8   2  -4  683.63   52.29
   8   2  -4  667.83   44.00
   7  -2  -4   40.00    5.60
   7  -2  -4   52.09   10.40
   7  -2  -4   45.30    7.90
   7   2  -4   45.00    9.40
   7   2  -4   42.30    9.00
   7   2  -4   45.90    6.40
  -6  -2   4  188.18   16.20
   6  -2  -4  177.28   11.90
   6  -2  -4  197.38   13.10
   6  -2  -4  201.58   14.10
  -6  -2   4  196.78   16.10
   6  -2  -4  199.28   18.70
   6   2  -4  176.98   15.80
   6   2  -4  180.08   16.80
   6   2  -4  186.78   13.20
   6   2  -4  204.78   13.90
   5  -2  -4   50.79    4.10
   5  -2  -4   58.29    9.40
  -5  -2   4   52.79    7.70
  -5  -2   4   54.39    8.00
   5  -2  -4   61.19    6.00
   5  -2  -4   55.39    6.50
   5   2  -4   64.39    9.20
  -5   2   4   65.09    5.40
   5   2  -4   51.19    7.30
   5   2  -4   50.69    6.30
   5   2  -4   62.19    6.60
   5   2  -4   55.79    8.10
   4  -2  -4  305.77   18.30
  -4  -2   4  242.08   18.90
   4  -2  -4  238.88   16.40
   4  -2  -4  250.17   20.20
  -4  -2   4  271.37   18.30
   4   2  -4  261.77   19.70
  -4   2   4  295.57   16.70
   4   2  -4  291.07   17.60
   4   2  -4  286.97   18.80
   4   2  -4  270.67   17.10
   4   2  -4  224.18   18.10
  -3  -2   4  286.67   18.20
   3  -2  -4  258.47   17.40
  -3  -2   4  312.77   19.40
   3  -2  -4  331.77   19.20
  -3  -2   4  280.27   18.60
  -3  -2   4  289.47   17.90
  -3  -2   4  295.67   19.90
   3  -2  -4  351.46   22.20
   3  -2  -4  323.97   21.20
  -3   2   4  259.57   17.30
   3   2  -4  289.97   18.30
   3   2  -4  240.28   19.30
   3   2  -4  264.87   18.60
   3   2  -4  289.17   17.90
  -3   2   4  270.57   18.80
   3   2  -4  265.97   18.50
  -3   2   4  290.07   21.70
  -2  -2   4 4718.93  257.07
  -2  -2   4 4343.67  256.87
  -2  -2   4 4804.72  256.17
   2  -2  -4 4616.54  255.87
   2  -2  -4 4776.92  256.97
  -2  -2   4 4813.72  256.57
   2  -2  -4 4555.94  258.57
  -2  -2   4 5117.29  255.57
   2  -2  -4 4842.02  257.87
   2   2  -4 4607.44  256.07
   2   2  -4 4410.96  257.47
  -2   2   4 5375.96  259.77
  -2   2   4 5234.88  255.07
  -2   2   4 4834.52  257.27
  -2   2   4 5202.98  258.87
  -2   2   4 4581.44  255.77
   2   2  -4 4768.82  256.37
   2   2  -4 4584.84  256.17
   2   2  -4 4531.15  256.27
   1  -2  -4  353.06   22.10
   1  -2  -4  351.86   24.10
  -1  -2   4  329.27   21.90
   1  -2  -4  377.46   23.00
  -1  -2   4  367.46   22.80
   1  -2  -4  348.37   22.50
  -1  -2   4  346.77   22.50
   1  -2  -4  396.46   22.60
  -1  -2   4  349.07   20.80
  -1  -2   4  344.77   22.00
   1   2  -4  372.86   23.40
   1   2  -4  358.76   22.00
   1   2  -4  361.36   21.60
  -1   2   4  369.26   22.00
  -1   2   4  345.97   22.70
   1   2  -4  357.96   21.30
  -1   2   4  335.47   24.10
  -1   2   4  348.77   23.00
   1   2  -4  414.66   22.40
   0  -2   4  866.21   46.80
   0  -2  -4  832.62   51.29
   0  -2   4  779.12   48.60
   0  -2   4  817.52   48.80
   0  -2   4  877.21   48.20
   0  -2  -4  914.91   49.00
   0  -2  -4  865.71   48.90
   0  -2  -4  832.32   49.60
   0  -2  -4  927.41   48.70
   0   2  -4  838.62   47.10
   0   2  -4  841.82   47.80
   0   2  -4  869.31   47.80
   0   2   4  872.11   51.59
   0   2   4  819.72   48.60
   0   2   4  878.71   50.19
   0   2   4  847.42   48.80
   0   2   4  844.02   48.50
   0   2  -4  937.81   49.70
   0   2  -4  854.81   48.20
  -1  -2  -4  402.96   23.70
   1  -2   4  368.46   22.90
  -1  -2  -4  378.56   23.20
  -1  -2  -4  379.06   24.00
   1  -2   4  417.66   22.80
   1  -2   4  380.46   22.00
   1  -2   4  402.36   23.70
  -1  -2  -4  371.66   26.90
   1  -2   4  398.96   24.30
  -1  -2  -4  397.56   25.20
  -1   2  -4  401.06   22.40
   1   2   4  363.56   24.70
   1   2   4  385.36   24.10
   1   2   4  384.76   23.30
   1   2   4  369.06   26.60
  -1   2  -4  361.86   23.10
  -1   2  -4  387.26   23.30
  -1   2  -4  402.16   24.20
   1   2   4  377.26   23.90
  -2  -2  -4  877.21   50.39
  -2  -2  -4  862.01   50.49
  -2  -2  -4  851.41   53.59
   2  -2   4  836.82   49.80
   2  -2   4  896.91   48.90
   2  -2   4  975.30   51.39
   2  -2   4  868.61   50.99
   2   2   4  997.50   51.59
   2   2   4  907.21   52.59
   2   2   4  911.31   49.90
   2   2   4  823.02   54.59
  -2   2  -4  863.81   48.70
  -2   2  -4  831.72   50.19
   2   2   4  901.41   50.59
  -2   2  -4  898.81   51.39
  -3  -2  -4 1182.98   69.09
  -3  -2  -4 1315.27   69.29
   3  -2   4 1212.28   68.49
   3  -2   4 1252.37   70.39
   3  -2   4 1245.88   67.79
   3  -2   4 1259.57   67.39
   3  -2   4 1148.69   70.99
   3   2   4 1186.98   69.29
   3   2   4 1293.77   68.89
  -3   2  -4 1079.69   68.39
   3   2   4 1341.17   71.99
   3   2   4 1409.16   71.19
   3   2   4 1240.88   75.59
  -3   2  -4 1250.97   67.29
   4  -2   4  207.18   12.70
  -4  -2  -4  207.38   14.10
   4  -2   4  209.28   13.70
   4  -2   4  238.28   16.70
   4  -2   4  198.28   13.00
   4  -2   4  216.98   18.00
   4   2   4  203.08   14.20
   4   2   4  211.18   21.20
   4   2   4  218.98   17.00
   4   2   4  212.28   16.40
  -4   2  -4  208.58   12.40
   4   2   4  196.38   14.00
  -4   2  -4  207.68   12.80
   5  -2   4  189.58   15.90
   5  -2   4  210.88   19.40
   5  -2   4  194.48   14.10
   5   2   4  193.18   13.10
   5   2   4  199.48   16.90
   5   2   4  191.88   23.70
   6  -2   4  322.77   23.60
   6  -2   4  388.06   26.00
   6  -2   4  389.26   30.60
   6   2   4  316.27   31.40
   6   2   4  370.96   21.30
   6   2   4  354.56   26.50
   7  -2   4   79.79   15.50
   7  -2   4  113.29   13.20
   7   2   4  104.59   20.20
   7   2   4  115.29   14.50
   8  -3  -4   93.39   12.20
   8  -3  -4   76.09   14.00
   8   3  -4  134.49   22.60
   8   3  -4   86.39   13.40
   8   3  -4   92.29   13.90
   7  -3  -4  267.37   16.80
   7  -3  -4  223.58   22.30
   7   3  -4  245.18   22.20
   7   3  -4  256.57   22.30
   7   3  -4  276.07   28.60
   6  -3  -4   53.19   10.80
  -6  -3   4   42.10    8.40
   6  -3  -4   53.49    5.80
   6  -3  -4   47.90    4.90
   6   3  -4   57.79    6.30
   6   3  -4   58.59    9.70
   6   3  -4   48.70    9.60
   5  -3  -4  135.19    8.40
   5  -3  -4  139.79    9.70
  -5  -3   4  119.89   11.00
   5  -3  -4  111.69   11.10
   5  -3  -4  127.69   15.70
  -5  -3   4  141.49   14.70
   5   3  -4  128.19    9.60
   5   3  -4  114.99   10.60
   5   3  -4  145.89   16.10
  -5   3   4  133.19    9.40
   5   3  -4  142.69   13.00
  -4  -3   4  435.26   25.20
  -4  -3   4  359.76   22.60
   4  -3  -4  392.36   24.60
   4  -3  -4  370.66   20.20
  -4  -3   4  407.66   26.30
   4  -3  -4  346.97   22.10
   4  -3  -4  354.96   26.50
   4   3  -4  337.77   23.40
  -4   3   4  353.86   21.90
   4   3  -4  348.67   25.60
   4   3  -4  319.87   23.90
   4   3  -4  364.66   22.20
   3  -3  -4  558.64   31.40
   3  -3  -4  523.85   34.30
  -3  -3   4  621.04   34.50
  -3  -3   4  549.74   30.90
  -3  -3   4  524.55   33.00
   3  -3  -4  572.14   36.80
   3  -3  -4  542.65   33.00
  -3  -3   4  509.35   31.30
   3   3  -4  500.75   31.90
   3   3  -4  506.25   32.30
   3   3  -4  485.25   32.20
  -3   3   4  510.45   30.90
   3   3  -4  476.65   33.60
  -3   3   4  508.25   28.50
  -2  -3   4 1405.06   72.79
   2  -3  -4 1196.38   72.99
  -2  -3   4 1517.45   75.19
   2  -3  -4 1300.77   74.99
  -2  -3   4 1348.97   74.09
  -2  -3   4 1307.67   72.59
   2  -3  -4 1280.37   75.39
   2  -3  -4 1276.67   74.59
  -2  -3   4 1274.37   74.79
  -2   3   4 1316.87   75.89
   2   3  -4 1245.28   75.39
   2   3  -4 1241.98   73.69
   2   3  -4 1403.26   73.89
   2   3  -4 1178.68   73.09
  -2   3   4 1328.67   71.59
  -2   3   4 1348.47   74.89
  -2   3   4 1388.16   73.39
  -2   3   4 1237.28   75.59
   1  -3  -4 1041.10   64.69
  -1  -3   4 1093.09   63.59
  -1  -3   4 1093.39   64.99
  -1  -3   4 1030.20   65.49
   1  -3  -4 1271.97   66.89
  -1  -3   4 1068.59   64.19
   1  -3  -4 1201.18   65.39
   1  -3  -4 1245.38   67.79
   1  -3  -4 1105.99   65.39
  -1  -3   4 1070.59   65.29
   1   3  -4 1104.29   64.19
  -1   3   4 1133.19   65.89
  -1   3   4 1254.87   65.29
  -1   3   4 1276.77   66.99
  -1   3   4 1219.48   64.09
   1   3  -4 1085.09   66.29
   1   3  -4 1108.69   64.49
  -1   3   4 1161.28   67.39
   1   3  -4 1321.37   65.49
   0  -3  -4  608.44   36.10
   0  -3   4  598.64   35.40
   0  -3   4  587.54   36.20
   0  -3  -4  570.04   36.90
   0  -3   4  599.14   34.10
   0  -3   4  579.64   36.10
   0  -3  -4  619.54   34.90
   0  -3  -4  597.24   38.30
   0  -3  -4  590.94   36.20
   0   3  -4  567.34   34.90
   0   3   4  587.84   35.90
   0   3  -4  587.84   34.80
   0   3  -4  612.24   37.00
   0   3   4  618.44   36.20
   0   3   4  578.84   38.00
   0   3   4  631.14   37.80
   0   3  -4  592.64   34.40
   0   3   4  588.74   35.70
   0   3  -4  576.34   32.80
   1  -3   4  170.88    9.80
   1  -3   4  162.78   11.40
   1  -3   4  169.28   12.80
  -1  -3  -4  159.98   13.10
   1  -3   4  156.78   11.50
  -1  -3  -4  197.88   13.50
   1  -3   4  167.48   13.20
  -1  -3  -4  143.29   11.10
   1   3   4  172.58   16.10
   1   3   4  160.88   13.20
   1   3   4  173.08   15.00
  -1   3  -4  134.69   12.80
  -1   3  -4  167.88   11.60
   1   3   4  183.88   13.60
   1   3   4  171.78   12.10
   2  -3   4   16.30    3.40
   2  -3   4    8.20    2.30
  -2  -3  -4   10.10    4.00
  -2  -3  -4   13.70    4.00
   2  -3   4   14.40    2.90
   2  -3   4   20.30    5.00
   2  -3   4   12.30    3.60
   2   3   4   22.30    5.20
  -2   3  -4   17.70    4.00
   2   3   4   16.30    6.50
   2   3   4   17.20    4.60
   2   3   4   14.80    5.40
   2   3   4   16.20    3.20
   3  -3   4  200.68   15.70
  -3  -3  -4  232.28   16.60
   3  -3   4  220.68   13.50
   3  -3   4  203.78   14.90
   3  -3   4  225.68   16.90
   3   3   4  229.28   16.30
  -3   3  -4  220.98   15.50
   3   3   4  222.58   14.30
   3   3   4  221.38   21.40
   3   3   4  197.38   16.80
   3   3   4  236.38   18.70
   4  -3   4  373.96   20.40
  -4  -3  -4  376.16   23.80
   4  -3   4  334.57   24.70
   4  -3   4  333.97   24.20
   4   3   4  350.66   21.70
  -4   3  -4  342.27   20.60
   4   3   4  302.47   25.50
   4   3   4  398.26   26.30
  -4   3  -4  362.96   21.70
   4   3   4  422.66   32.30
   4   3   4  354.66   23.80
   5  -3   4  508.05   35.50
   5  -3   4  568.84   34.20
   5  -3   4  488.35   30.80
   5   3   4  536.95   41.40
   5   3   4  503.25   31.50
   5   3   4  492.35   34.30
   6  -3   4   19.90    4.80
   6  -3   4   11.40    9.50
   6  -3   4   24.70    7.80
   6  -3   4   16.20    5.80
   6   3   4   15.70   10.20
   6   3   4    9.70    3.20
   6   3   4    8.80    5.60
   7  -3   4   44.90    8.80
   7  -3   4   50.99   14.00
   7   3   4   40.40   13.70
   7   3   4   41.10    9.60
   8  -4  -4  149.88   20.80
   8   4  -4  231.28   21.50
   8   4  -4  156.08   19.70
   8   4  -4  214.58   28.80
   7  -4  -4  442.56   27.00
   7  -4  -4  427.26   34.90
   7   4  -4  411.16   37.60
   7   4  -4  573.24   36.00
   7   4  -4  455.55   34.80
  -6  -4   4  100.79   13.50
   6  -4  -4   97.19   14.70
   6  -4  -4  105.79    7.90
   6   4  -4   87.59   15.80
   6   4  -4   73.19   12.20
   6   4  -4   71.39   12.00
   5  -4  -4  104.09   11.70
   5  -4  -4   98.89   14.40
  -5  -4   4   95.49   12.80
   5  -4  -4  101.29    8.30
   5  -4  -4   95.59    7.20
  -5  -4   4   92.49    8.40
   5   4  -4   96.99   10.70
   5   4  -4   82.19   12.00
  -5   4   4   89.49    7.80
   5   4  -4   94.69   13.80
   5   4  -4  108.09   16.40
   4  -4  -4  319.07   19.50
  -4  -4   4  352.16   20.70
  -4  -4   4  351.16   24.00
   4  -4  -4  290.07   23.30
  -4  -4   4  294.17   24.40
   4  -4  -4  321.37   25.60
   4  -4  -4  333.17   21.40
  -4   4   4  359.36   21.30
   4   4  -4  312.07   23.70
  -4   4   4  328.67   18.60
   4   4  -4  357.36   27.20
   4   4  -4  314.27   25.60
   4   4  -4  354.56   23.50
   3  -4  -4  826.12   53.99
  -3  -4   4  897.91   49.90
  -3  -4   4  876.51   54.09
  -3  -4   4  947.41   53.69
   3  -4  -4  839.32   53.09
   3  -4  -4  923.61   51.59
   3  -4  -4  877.31   49.00
   3   4  -4  830.42   54.79
  -3   4   4  858.61   50.99
  -3   4   4  878.11   48.70
   3   4  -4  917.81   53.09
   3   4  -4  918.51   52.99
  -2  -4   4 1314.37   64.29
   2  -4  -4 1240.78   65.99
  -2  -4   4 1107.89   64.19
  -2  -4   4 1119.29   67.09
  -2  -4   4 1092.49   66.29
   2  -4  -4 1096.59   67.09
   2  -4  -4 1084.59   66.59
  -2   4   4 1046.10   66.79
   2   4  -4 1075.69   65.59
  -2   4   4 1172.98   63.49
  -2   4   4 1098.09   64.99
   2   4  -4 1192.38   68.39
  -1  -4   4   12.20    4.30
   1  -4  -4   14.70    6.00
  -1  -4   4    8.70    4.50
   1  -4  -4   11.90    5.40
  -1  -4   4   12.30    3.50
   1  -4  -4    4.40    3.50
   1  -4  -4   20.50    5.00
  -1  -4   4    8.80    4.60
   1   4  -4   10.80    3.90
  -1   4   4   12.40    3.50
   1   4  -4   17.00    3.60
   1   4  -4   18.40    6.00
  -1   4   4    6.40    4.00
  -1   4   4   12.10    5.40
  -1   4   4   15.00    5.40
   0  -4   4  550.94   32.90
   0  -4   4  601.94   35.60
   0  -4  -4  561.04   35.10
   0  -4   4  547.55   34.40
   0  -4  -4  558.34   33.00
   0  -4   4  605.94   35.80
   0  -4  -4  546.75   35.00
   0   4  -4  545.15   35.90
   0   4   4  492.25   34.30
   0   4   4  521.85   36.10
   0   4  -4  560.64   33.40
   0   4   4  562.04   34.20
   0   4   4  548.35   37.00
   0   4   4  508.15   34.50
   0   4   4  573.74   34.70
   1  -4   4 1137.69   65.79
   1  -4   4 1163.68   66.59
   1  -4   4 1229.38   67.99
  -1  -4  -4 1140.69   68.19
  -1  -4  -4 1239.48   65.19
   1  -4   4 1136.49   67.89
   1   4   4 1152.68   68.19
  -1   4  -4 1198.58   68.69
   1   4   4 1157.58   66.09
   1   4   4 1230.58   71.29
   1   4   4 1107.59   67.79
   1   4   4 1122.39   69.59
   2  -4   4  218.98   16.90
   2  -4   4  231.48   15.00
  -2  -4  -4  209.68   13.60
   2  -4   4  205.08   14.80
  -2  -4  -4  189.58   16.40
   2  -4   4  193.48   15.70
   2   4   4  193.48   16.60
   2   4   4  186.78   17.70
   2   4   4  188.88   16.40
   2   4   4  213.28   19.80
   2   4   4  204.98   14.20
  -2   4  -4  205.48   16.60
   3  -4   4  378.26   23.00
  -3  -4  -4  360.26   25.70
   3  -4   4  378.16   25.90
   3  -4   4  378.06   22.60
   3  -4   4  417.86   24.80
   3  -4   4  375.46   24.60
  -3   4  -4  370.96   24.90
   3   4   4  369.86   22.60
   3   4   4  319.17   25.30
   3   4   4  355.96   30.40
   3   4   4  359.96   28.20
   3   4   4  373.16   26.80
   4  -4   4  541.65   32.80
   4  -4   4  497.45   34.60
  -4  -4  -4  551.44   34.50
   4  -4   4  533.15   33.60
   4  -4   4  499.75   31.30
   4   4   4  608.34   36.90
   4   4   4  511.45   34.20
   4   4   4  530.35   40.80
   5  -4   4   78.89    5.90
   5  -4   4   84.89   11.40
   5  -4   4   75.99   10.40
   5   4   4   63.89   14.30
   5   4   4   71.99    9.30
   5   4   4   72.39   11.30
   6  -4   4  254.37   21.80
   6  -4   4  325.97   30.60
   6   4   4  273.97   20.30
   6   4   4  279.27   30.10
   6   4   4  298.17   24.80
   7  -4   4   33.70   12.60
   7  -4   4   28.80    8.20
   7   4   4   40.80   10.20
   7   4   4   23.20    4.60
   8  -5  -4   51.19   13.10
   8   5  -4   53.59   11.40
   8   5  -4   27.60   12.20
   8   5  -4   36.90   11.30
   7  -5  -4   98.79    8.20
   7  -5  -4  116.09   17.70
   7   5  -4   83.89   14.30
   7   5  -4  118.69   19.70
   7   5  -4   76.09   14.30
   6  -5  -4  251.57   16.60
   6  -5  -4  215.38   24.40
  -6  -5   4  255.47   22.30
   6   5  -4  257.07   26.60
   6   5  -4  220.68   21.60
   6   5  -4  288.47   25.20
   5  -5  -4  533.95   38.50
   5  -5  -4  559.44   31.00
  -5  -5   4  492.25   36.30
   5  -5  -4  506.25   31.80
   5   5  -4  496.45   36.20
   5   5  -4  514.75   39.70
   5   5  -4  560.94   39.00
  -5   5   4  506.65   31.40
  -4  -5   4  167.28   17.90
   4  -5  -4  155.68   10.80
   4  -5  -4  133.99   15.40
   4  -5  -4  121.19   15.80
   4  -5  -4  160.68   12.70
  -4  -5   4  152.88   15.60
  -4  -5   4  134.79   10.30
   4   5  -4  153.28   18.30
  -4   5   4  134.69   11.80
   4   5  -4  112.39   14.30
   4   5  -4  130.69   16.60
  -4   5   4  149.39    9.60
  -3  -5   4  597.04   38.30
   3  -5  -4  540.55   36.10
   3  -5  -4  560.44   33.90
  -3  -5   4  591.44   39.20
   3  -5  -4  612.44   39.40
  -3  -5   4  609.64   34.00
   3  -5  -4  541.85   38.40
   3   5  -4  551.44   39.90
  -3   5   4  558.54   33.60
   3   5  -4  531.65   37.40
  -3   5   4  624.54   36.40
   3   5  -4  645.04   39.60
   2  -5  -4  215.68   18.00
   2  -5  -4  204.88   15.90
  -2  -5   4  195.78   17.40
  -2  -5   4  181.58   13.10
  -2  -5   4  162.98   15.70
   2  -5  -4  182.48   16.30
  -2   5   4  151.18   15.00
   2   5  -4  171.18   14.50
   2   5  -4  176.08   14.80
   2   5  -4  155.38   18.50
  -2   5   4  155.48   14.40
  -2   5   4  171.18   12.90
   1  -5  -4  192.18   16.60
  -1  -5   4  208.38   17.10
  -1  -5   4  208.48   17.70
   1  -5  -4  201.58   16.10
   1   5  -4  169.28   14.90
  -1   5   4  215.88   16.70
  -1   5   4  168.58   16.40
   1   5  -4  179.58   13.40
  -1   5   4  200.28   15.00
   1   5  -4  199.88   18.80
   0  -5   4 1225.18   68.09
   0  -5   4 1114.49   69.69
   0  -5   4 1200.28   69.69
   0  -5  -4 1189.48   67.69
   0  -5  -4 1097.89   70.39
   0  -5   4 1298.57   71.29
   0   5   4 1186.88   70.29
   0   5   4 1200.18   69.79
   0   5   4 1254.17   70.69
   0   5  -4 1154.58   68.39
   0   5   4 1189.78   72.09
   0   5  -4 1188.18   71.79
  -1  -5  -4  834.92   49.20
   1  -5   4  860.41   51.79
  -1  -5  -4  925.31   54.29
   1  -5   4  867.51   52.99
   1  -5   4  958.80   51.29
   1  -5   4  762.32   51.99
   1   5   4  831.02   55.19
   1   5   4  897.31   51.39
  -1   5  -4  891.11   53.89
   1   5   4  837.52   53.09
   1   5   4  849.32   53.29
   2  -5   4  317.87   21.70
   2  -5   4  309.47   19.40
   2  -5   4  233.18   18.10
  -2  -5  -4  242.68   16.00
   2  -5   4  265.37   20.10
  -2  -5  -4  256.07   21.50
  -2   5  -4  238.08   20.20
   2   5   4  255.97   20.90
   2   5   4  242.88   17.60
   2   5   4  234.58   20.30
   2   5   4  281.37   23.70
   3  -5   4  623.54   37.00
  -3  -5  -4  621.14   40.60
   3  -5   4  584.74   39.40
   3   5   4  601.84   44.30
   3   5   4  679.43   47.60
  -3   5  -4  581.34   38.80
   3   5   4  610.74   35.50
   3   5   4  626.84   40.40
   3   5   4  585.64   40.60
   4  -5   4  146.19   15.90
   4  -5   4  136.39   14.20
  -4  -5  -4  158.08   16.70
   4   5   4  176.38   22.70
   4   5   4  152.58   17.40
   4   5   4  145.09   15.70
   5  -5   4   88.49   12.10
   5  -5   4   67.49    7.40
   5   5   4   54.59    9.60
   5   5   4   54.49   14.60
   5   5   4   70.19   12.10
   6  -5   4   42.70    9.10
   6  -5   4   30.70   12.90
   6   5   4   32.00    7.30
   6   5   4   27.00    8.70
   6   5   4   23.00   12.20
   7  -6  -4  271.97   28.80
   7   6  -4  290.97   26.00
   7   6  -4  230.28   29.80
   7   6  -4  237.78   26.90
   6  -6  -4  165.28   13.10
   6  -6  -4  174.28   21.40
   6   6  -4  150.58   22.20
   6   6  -4  195.78   21.30
   6   6  -4  134.79   19.80
   5  -6  -4  467.85   34.10
   5  -6  -4  398.66   26.70
  -5  -6   4  401.56   31.20
   5   6  -4  398.16   33.00
   5   6  -4  367.06   30.20
   5   6  -4  408.96   33.50
   4  -6  -4  332.47   21.00
   4  -6  -4  317.67   23.10
  -4  -6   4  345.17   26.80
   4  -6  -4  321.67   27.00
  -4  -6   4  324.67   24.70
   4   6  -4  265.37   26.80
   4   6  -4  332.67   25.90
  -4   6   4  307.07   22.20
   4   6  -4  285.17   25.50
  -3  -6   4  896.41   60.69
   3  -6  -4  889.61   58.29
   3  -6  -4  996.10   61.39
   3  -6  -4  876.81   63.09
   3  -6  -4  952.20   55.79
  -3  -6   4 1004.00   60.59
  -3  -6   4  993.80   55.19
   3   6  -4  959.40   62.69
  -3   6   4  894.31   57.69
   3   6  -4 1063.69   60.69
   3   6  -4 1037.50   60.59
  -3   6   4 1037.60   55.59
   2  -6  -4  104.09   12.90
   2  -6  -4  110.59   14.00
  -2  -6   4  120.99   15.30
  -2  -6   4  122.99   14.60
  -2  -6   4  103.99   11.70
   2   6  -4  126.09   11.90
  -2   6   4  106.69   13.00
   2   6  -4  111.49   13.70
  -2   6   4  126.69   13.10
   2   6  -4  125.19   16.70
  -2   6   4  116.89   10.70
   1  -6  -4   24.60    6.00
   1  -6  -4   15.80    6.60
  -1  -6   4   30.60    7.60
  -1  -6   4   16.50    6.70
   1   6  -4   19.20    6.00
  -1   6   4   26.60    7.90
  -1   6   4   11.60    5.80
   1   6  -4   12.90    7.00
   1   6  -4   25.80    4.40
   0  -6   4   72.29   11.20
   0  -6  -4   71.19    9.10
   0  -6  -4   67.29   11.20
   0  -6   4   66.49   10.60
   0   6  -4   74.89   12.60
   0   6  -4   66.19    9.60
   0   6   4   74.19   11.40
   0   6   4   76.89   11.30
   0   6   4   74.59   11.80
  -1  -6  -4  294.27   24.50
   1  -6   4  294.07   23.50
  -1  -6  -4  295.27   19.40
   1  -6   4  314.57   23.10
   1  -6   4  276.67   22.80
  -1   6  -4  277.47   23.90
   1   6   4  360.96   25.30
   1   6   4  255.47   24.40
   1   6   4  277.37   21.40
   1   6   4  322.67   24.60
  -2  -6  -4  233.18   21.80
   2  -6   4  246.58   20.60
  -2  -6  -4  250.77   15.90
   2  -6   4  258.27   19.70
   2   6   4  251.27   18.30
  -2   6  -4  224.88   20.80
   2   6   4  247.28   21.90
   2   6   4  296.97   25.40
   2   6   4  235.28   21.70
   3  -6   4   21.20    6.90
  -3  -6  -4   24.30    7.90
   3  -6   4   31.90    8.00
   3   6   4   18.90    7.50
   3   6   4   20.50    7.70
   3   6   4   22.80    8.30
  -4  -6  -4  300.47   23.80
   4  -6   4  247.38   21.90
   4  -6   4  258.37   20.90
   4   6   4  264.97   24.10
   4   6   4  254.67   26.30
   4   6   4  253.27   22.60
   5  -6   4   -5.50    7.90
   5  -6   4    1.30    4.10
   5  -6   4   -1.90    5.00
   5   6   4    6.20    6.20
   5   6   4   -4.40    4.60
   5   6   4   -2.70    4.00
   6  -6   4  250.47   31.60
   6  -6   4  207.98   22.60
   6   6   4  226.68   24.80
   6   6   4  234.88   20.30
   7   7  -4  166.78   24.30
   6  -7  -4    3.80    3.50
   6  -7  -4    7.00    5.70
   6   7  -4   14.10    9.80
   6   7  -4    7.00    7.20
   6   7  -4    3.40    7.50
   5  -7  -4  419.06   28.00
   5  -7  -4  447.06   34.50
  -5  -7   4  379.76   33.80
   5   7  -4  382.16   32.80
   5   7  -4  419.66   34.90
   5   7  -4  368.76   31.80
   4  -7  -4  160.38   13.50
  -4  -7   4  200.78   20.10
   4  -7  -4  135.09   15.10
   4  -7  -4  176.88   20.10
   4   7  -4  152.38   18.90
   4   7  -4  154.18   21.00
  -4   7   4  162.68   14.80
   4   7  -4  155.88   19.20
  -3  -7   4   46.00   10.40
   3  -7  -4   42.70    7.60
   3  -7  -4   57.59   11.50
   3  -7  -4   46.90    9.30
  -3  -7   4   62.09   11.00
   3   7  -4   60.39   11.10
   3   7  -4   49.80   10.00
  -3   7   4   54.29    9.40
   3   7  -4   75.59   14.50
   2  -7  -4  185.58   19.40
  -2  -7   4  155.08   19.90
  -2  -7   4  236.78   20.50
   2  -7  -4  185.58   18.50
   2   7  -4  167.28   22.60
   2   7  -4  198.38   18.50
  -2   7   4  172.98   18.20
  -2   7   4  222.18   18.70
   2   7  -4  220.78   16.80
   1  -7  -4  513.45   38.30
  -1  -7   4  530.95   38.40
  -1  -7   4  537.45   38.50
   1  -7  -4  563.84   36.90
  -1   7   4  529.35   37.50
   1   7  -4  563.94   33.00
   1   7  -4  582.94   41.90
   1   7  -4  556.04   37.70
  -1   7   4  519.85   38.40
   0  -7  -4   34.20    9.80
   0  -7  -4   69.89    9.30
   0  -7   4   51.69   11.10
   0   7  -4   79.39   11.00
   0   7  -4   61.09   12.40
   0   7   4   55.39   11.00
   0   7   4   77.29   12.00
   0   7   4   56.29   11.40
   1  -7   4  419.46   31.90
  -1  -7  -4  416.76   33.10
  -1  -7  -4  445.36   27.60
   1   7   4  455.05   34.60
  -1   7  -4  403.86   33.30
   1   7   4  445.06   33.20
   1   7   4  440.26   33.00
   2  -7   4   27.90    9.60
   2  -7   4   42.70    9.80
  -2  -7  -4   37.40    9.90
   2   7   4   45.10   10.60
  -2   7  -4   46.70    9.60
   2   7   4   34.10    8.90
   2   7   4   51.39   10.80
  -3  -7  -4  196.48   21.90
   3  -7   4  231.98   22.70
   3  -7   4  220.38   22.20
   3   7   4  213.98   22.30
   3   7   4  177.28   21.40
   3   7   4  202.78   24.90
   4  -7   4  137.69   17.40
   4  -7   4  117.69   20.00
   4  -7   4  128.59   15.80
   4   7   4  109.29   16.30
   4   7   4  124.59   16.60
   4   7   4  132.99   21.00
   5  -7   4   58.69    9.60
   5  -7   4   77.39   12.80
   5  -7   4   37.20   14.20
   5   7   4   59.09   13.40
   5   7   4   74.99   17.80
   5   7   4   55.09   11.50
   6  -8  -4   92.09   11.00
   6   8  -4  109.69   19.00
   6   8  -4   93.99   18.90
  -5  -8   4  171.68   24.10
   5  -8  -4  138.29   15.10
   5  -8  -4  114.49   18.00
   5   8  -4  121.99   17.90
   5   8  -4  183.78   23.00
   5   8  -4  150.28   22.50
   4  -8  -4   26.10    9.20
   4  -8  -4   20.90    7.20
  -4  -8   4   36.30   12.50
  -4  -8   4   17.10    6.70
   4   8  -4   16.00    7.60
   4   8  -4   22.20    8.90
   4   8  -4   23.60   11.20
   3  -8  -4   40.90    7.50
  -3  -8   4   51.19   11.00
   3  -8  -4   45.90    9.50
  -3  -8   4   38.00   11.10
   3  -8  -4   21.20    7.90
   3   8  -4   40.60   11.40
   3   8  -4   43.80    9.30
   3   8  -4   44.80   10.60
  -3   8   4   40.10    9.10
  -2  -8   4  448.66   37.60
   2  -8  -4  544.55   36.00
   2  -8  -4  457.85   34.20
  -2  -8   4  455.05   35.10
  -2   8   4  457.95   34.20
   2   8  -4  460.75   34.80
   2   8  -4  432.16   37.80
  -2   8   4  464.95   34.30
   1  -8  -4   19.40    8.10
   1  -8  -4    6.70    5.60
  -1  -8   4   10.30    6.90
  -1  -8   4  -10.20    4.70
   1   8  -4   10.50    6.40
   1   8  -4    9.10    6.90
  -1   8   4    0.70    6.00
  -1   8   4   16.70    7.70
   0  -8   4  434.16   32.60
   0  -8   4  506.15   37.10
   0  -8  -4  385.16   32.60
   0  -8  -4  438.66   28.90
   0   8  -4  355.46   32.60
   0   8  -4  400.46   29.90
   0   8   4  414.96   31.90
   0   8   4  392.06   32.10
   0   8   4  376.36   31.90
   1  -8   4   36.90    9.90
  -1  -8  -4   48.10    7.10
  -1  -8  -4   27.70    9.80
   1  -8   4   49.99   12.00
  -1   8  -4   30.50   10.20
   1   8   4   37.10   10.50
   1   8   4   49.80   11.50
   1   8   4   47.00   10.40
  -2  -8  -4   27.90    8.90
   2  -8   4    3.70    6.00
   2  -8   4   14.30    8.70
   2   8   4   23.90    8.60
   2   8   4   35.10   10.00
   2   8   4   12.40    7.50
   3  -8   4  252.07   21.90
   3  -8   4  159.58   23.90
  -3  -8  -4  188.98   22.30
   3  -8   4  187.08   20.90
   3   8   4  187.48   24.60
   3   8   4  154.18   20.80
   3   8   4  200.98   22.40
   4  -8   4   48.10   15.20
   4  -8   4   26.80    8.60
   4  -8   4   31.00    9.50
   4   8   4   33.30   10.10
   4   8   4   32.50   12.30
   4   8   4   34.70   10.90
  -5  -9   4   50.39   14.50
   5  -9  -4   46.10    9.50
   4  -9  -4   19.10    6.90
   4  -9  -4   16.50    7.80
  -4  -9   4   32.80   10.00
  -4  -9   4   20.10   10.90
   4   9  -4   29.80   10.00
   4   9  -4   27.50   11.40
   3  -9  -4   24.80    8.70
   3  -9  -4   13.00    7.50
  -3  -9   4   22.30    9.30
  -3  -9   4   27.30    9.60
   3   9  -4    9.60    8.30
   3   9  -4   22.40    7.90
   2  -9  -4    5.80    6.50
   2  -9  -4   12.40    5.80
  -2  -9   4    6.20    5.50
  -2  -9   4    4.10    6.70
   2   9  -4   -0.20    5.70
  -2   9   4    3.30    5.50
   2   9  -4   18.20    7.10
  -2   9   4   -1.60    5.80
   1  -9  -4  314.97   25.90
  -1  -9   4  318.87   33.70
  -1  -9   4  344.47   29.10
  -1  -9   4  297.17   27.90
   1  -9  -4  296.67   28.30
   1   9  -4  328.17   27.80
  -1   9   4  309.17   27.20
   1   9  -4  355.96   32.40
  -1   9   4  336.07   28.00
   0  -9  -4   56.79    9.20
   0  -9  -4   73.49   13.70
   0  -9   4   81.69   16.80
   0  -9   4   70.99   14.60
   0  -9   4   68.19   13.80
   0   9  -4   78.09   15.50
   0   9  -4   52.69   10.40
   0   9   4   79.99   14.70
   0   9   4   61.59   12.30
   0   9   4   64.19   12.50
   1  -9   4  162.18   20.00
   1  -9   4  154.08   22.70
  -1  -9  -4  216.48   24.00
   1  -9   4  165.08   22.50
   1   9   4  256.57   25.70
   1   9   4  163.38   21.00
   1   9   4  204.48   24.10
   2  -9   4   10.60    9.30
  -2  -9  -4    0.50    7.00
   2  -9   4    3.40    4.90
   2  -9   4    6.30    7.90
   2   9   4    8.10    7.60
   2   9   4    6.60    7.80
   2   9   4    6.50    8.10
   3  -9   4   93.99   19.50
   3  -9   4   87.49   15.30
   3  -9   4   59.79   12.20
  -3  -9  -4   86.79   14.80
   3   9   4   81.59   16.90
   3   9   4   83.69   15.30
   3   9   4  108.29   17.80
   3 -10  -4   82.49   15.00
  -3 -10   4   69.79   16.40
   3  10  -4   91.19   16.20
   3  10  -4   94.59   18.40
  -2 -10   4   25.40   10.00
   2 -10  -4   39.70   10.10
   2 -10  -4   43.10   12.00
  -2 -10   4   35.60   11.40
   2  10  -4    8.70    7.80
   2  10  -4   39.60   12.10
  -2  10   4   49.70   11.70
  -1 -10   4    8.50   10.70
   1 -10  -4   12.70    7.40
  -1 -10   4   38.30   10.30
   1 -10  -4   12.90    6.20
   1  10  -4   29.20    9.60
  -1  10   4    7.30    5.50
  -1  10   4    7.60    7.70
   1  10  -4   20.60   11.20
   0 -10   4   11.70    8.40
   0 -10   4   18.80    9.90
   0 -10  -4    6.10    8.30
   0 -10   4   16.50    9.10
   0  10  -4   19.60   10.40
   0  10   4   16.30    8.40
   0  10  -4   23.10    8.50
   0  10   4    3.80    7.80
   1 -10   4   23.20   11.00
  -1 -10  -4   22.60    8.90
   1 -10   4   11.10    8.60
   1  10   4   11.80    8.50
   1  10   4    8.20    7.00
   1  10   4    9.80    8.60
   9   0  -5  176.78   19.40
   8   0  -5   65.79    9.90
   8   0  -5   63.19   10.10
   8   0  -5   63.39    8.80
   7   0  -5  930.91   50.89
   7   0  -5  767.32   50.59
   7   0  -5  806.62   51.09
   6   0  -5  118.39   12.20
   6   0  -5   84.49    8.30
   6   0  -5   88.59    8.10
  -6   0   5   91.49   10.00
   6   0  -5  129.19   11.10
   6   0  -5  138.39   11.50
   5   0  -5  431.16   26.30
   5   0  -5  396.66   25.00
   5   0  -5  381.36   25.10
  -5   0   5  382.66   24.60
   5   0  -5  383.76   23.10
   5   0  -5  369.96   23.50
   4   0  -5  340.97   20.30
   4   0  -5  275.47   18.50
   4   0  -5  290.57   16.80
   4   0  -5  272.27   18.40
   4   0  -5  259.27   17.50
  -4   0   5  273.07   20.30
  -4   0   5  274.97   18.30
  -3   0   5  159.98   11.70
  -3   0   5  163.68   11.70
   3   0  -5  174.58   10.40
   3   0  -5  187.58   12.50
   3   0  -5  171.38   13.00
  -3   0   5  165.18   10.90
   3   0  -5  175.38   11.70
  -3   0   5  187.08   14.20
   2   0  -5  586.44   37.60
   2   0  -5  710.53   35.50
  -2   0   5  674.73   35.40
  -2   0   5  585.14   36.30
   2   0  -5  582.44   36.10
  -2   0   5  578.64   34.50
   2   0  -5  576.44   35.20
   2   0  -5  638.94   33.90
  -2   0   5  584.44   35.00
   1   0  -5 3135.69  177.98
  -1   0   5 3188.78  175.48
   1   0  -5 3587.84  176.28
   1   0  -5 3318.17  175.98
   1   0  -5 3199.38  176.98
  -1   0   5 3277.57  175.88
  -1   0   5 3258.57  175.98
  -1   0   5 3119.99  178.08
  -1   0   5 3350.76  177.18
   0   0  -5  216.18   12.60
   0   0  -5  225.48   14.00
   0   0  -5  208.78   13.90
   0   0  -5  212.38   15.00
   0   0   5  214.38   13.80
   0   0   5  215.48   13.70
   0   0   5  223.88   15.00
   0   0   5  213.38   16.10
   0   0  -5  220.88   16.40
   0   0   5  218.48   14.10
   1   0   5  949.31   52.09
   1   0   5  936.21   54.99
  -1   0  -5  931.11   55.09
  -1   0  -5  894.41   51.29
  -1   0  -5  978.40   51.99
   1   0   5  991.20   53.09
   1   0   5  913.61   51.79
   1   0   5  904.81   51.29
   1   0   5  899.11   49.99
  -1   0  -5  899.31   49.70
   2   0   5   58.29    6.50
   2   0   5   56.19    6.60
   2   0   5   56.79    7.00
  -2   0  -5   57.49    5.20
  -2   0  -5   91.79   11.40
   2   0   5   70.09    5.40
  -2   0  -5   55.89    6.20
   2   0   5   55.59    9.10
   2   0   5   64.29    5.40
   3   0   5    7.80    3.10
   3   0   5    8.50    2.80
   3   0   5    6.80    3.00
  -3   0  -5   12.00    2.30
   3   0   5   14.40    2.60
   3   0   5    5.20    4.20
   4   0   5   26.00    4.60
   4   0   5   20.10    2.90
   4   0   5   18.30    4.30
   4   0   5   28.70    5.00
   4   0   5   35.20    8.90
  -4   0  -5   18.50    2.90
   5   0   5  287.07   26.10
   5   0   5  280.67   16.90
   5   0   5  311.57   20.50
   5   0   5  282.97   20.50
   6   0   5    8.00    4.80
   6   0   5    6.00    4.50
   6   0   5   11.50    7.80
   7   0   5  316.87   24.50
   7   0   5  373.86   33.50
   9  -1  -5  103.79   14.70
   9   1  -5  126.99   19.80
   9   1  -5  143.99   19.60
   8  -1  -5  290.27   25.00
   8  -1  -5  326.87   24.30
   8   1  -5  336.87   25.30
   8   1  -5  298.97   23.80
   8   1  -5  331.17   23.30
   7  -1  -5  101.59   11.00
   7  -1  -5   95.39   12.90
   7  -1  -5  108.79   12.10
   7   1  -5   89.79   10.80
   7   1  -5   90.99   12.20
   7   1  -5  111.49   12.80
   6  -1  -5  207.68   12.50
  -6  -1   5  247.98   17.50
   6  -1  -5  195.88   16.30
   6  -1  -5  229.08   15.10
   6  -1  -5  189.08   15.30
   6  -1  -5  212.18   13.60
   6  -1  -5  235.98   18.90
  -6   1   5  218.68   15.10
   6   1  -5  220.88   17.20
   6   1  -5  205.68   15.60
   6   1  -5  203.78   17.20
   6   1  -5  217.68   14.50
   6   1  -5  225.88   16.50
   5  -1  -5  445.06   24.80
   5  -1  -5  416.26   29.50
   5  -1  -5  422.86   26.80
   5  -1  -5  455.85   24.30
   5  -1  -5  419.96   27.00
  -5  -1   5  453.55   28.70
  -5   1   5  457.05   27.00
   5   1  -5  437.96   28.10
   5   1  -5  506.15   30.00
   5   1  -5  457.25   26.80
   5   1  -5  441.36   27.30
   5   1  -5  459.35   28.80
  -4  -1   5 1768.92   99.59
  -4  -1   5 1670.93   98.39
   4  -1  -5 1663.53   97.09
   4  -1  -5 1910.11   99.99
   4  -1  -5 1671.23   96.99
  -4   1   5 1993.00   97.19
   4   1  -5 1723.33   98.79
   4   1  -5 1750.52   98.09
   4   1  -5 1782.92   97.09
   4   1  -5 1890.01   97.09
   4   1  -5 1691.63   97.99
   3  -1  -5 1183.98   64.59
   3  -1  -5 1133.29   65.89
   3  -1  -5 1185.18   68.29
  -3  -1   5 1317.57   64.59
   3  -1  -5 1116.69   64.09
  -3  -1   5 1142.79   64.39
  -3  -1   5 1172.28   65.69
  -3  -1   5 1115.29   64.99
  -3   1   5 1187.68   67.39
   3   1  -5 1171.68   63.99
  -3   1   5 1225.58   64.79
   3   1  -5 1076.29   63.79
   3   1  -5 1154.88   65.69
   3   1  -5 1064.39   64.89
  -3   1   5 1211.98   64.19
   3   1  -5 1080.69   64.39
  -2  -1   5 1272.97   68.19
   2  -1  -5 1225.98   68.99
  -2  -1   5 1213.08   68.29
   2  -1  -5 1167.78   67.79
  -2  -1   5 1187.48   68.49
   2  -1  -5 1202.08   67.59
   2  -1  -5 1166.28   70.49
  -2  -1   5 1297.47   67.69
  -2   1   5 1200.18   65.99
   2   1  -5 1238.78   70.09
   2   1  -5 1356.76   67.39
   2   1  -5 1193.58   68.49
  -2   1   5 1187.88   67.39
  -2   1   5 1170.88   67.99
   2   1  -5 1266.47   68.59
   2   1  -5 1286.47   67.49
  -2   1   5 1249.88   69.79
   2   1  -5 1154.88   66.99
   1  -1  -5 1027.30   57.69
  -1  -1   5 1012.30   57.99
  -1  -1   5 1005.70   57.39
   1  -1  -5 1003.60   58.09
   1  -1  -5  957.90   59.69
   1  -1  -5 1073.49   57.19
  -1  -1   5 1075.59   57.49
  -1  -1   5  985.50   56.89
   1   1  -5  991.70   55.89
  -1   1   5 1051.59   57.99
  -1   1   5 1189.18   60.89
  -1   1   5 1051.99   55.99
   1   1  -5 1006.20   56.69
  -1   1   5 1039.20   57.09
   1   1  -5 1007.60   58.69
   1   1  -5 1038.40   57.79
  -1   1   5 1008.90   58.39
   1   1  -5 1031.40   56.69
   1   1  -5  981.40   58.09
   0  -1  -5 3013.60  148.19
   0  -1   5 2671.03  148.09
   0  -1   5 2608.44  146.49
   0  -1   5 2728.53  148.29
   0  -1  -5 2628.54  146.89
   0  -1   5 2679.93  147.09
   0  -1  -5 2899.11  146.79
   0  -1  -5 2610.24  150.18
   0  -1   5 2772.82  147.49
   0  -1  -5 2562.14  147.69
   0   1   5 2717.63  147.99
   0   1  -5 2668.63  146.49
   0   1   5 2686.13  147.89
   0   1  -5 2772.92  146.59
   0   1  -5 2777.12  147.29
   0   1  -5 2681.43  148.49
   0   1   5 2699.43  150.48
   0   1   5 2816.32  146.99
  -1  -1  -5  803.72   45.00
   1  -1   5  820.82   46.50
   1  -1   5  753.82   45.50
  -1  -1  -5  746.03   45.30
  -1  -1  -5  734.43   49.20
   1  -1   5  831.72   45.40
  -1  -1  -5  823.82   46.80
   1  -1   5  757.72   46.90
   1  -1   5  754.42   47.30
   1   1   5  817.12   49.80
  -1   1  -5  859.41   45.40
   1   1   5  800.82   47.10
  -1   1  -5  905.91   48.40
   1   1   5  883.01   46.80
  -1   1  -5  803.02   45.70
   1   1   5  872.41   45.60
   1   1   5  816.62   45.60
  -2  -1  -5  314.77   20.40
   2  -1   5  335.67   20.50
   2  -1   5  327.87   20.40
   2  -1   5  335.17   19.30
  -2  -1  -5  361.46   20.20
   2  -1   5  367.06   22.10
   2  -1   5  330.87   23.40
  -2   1  -5  358.46   20.50
  -2   1  -5  335.37   20.80
   2   1   5  328.77   20.60
   2   1   5  352.46   25.80
   2   1   5  352.86   21.80
   2   1   5  333.17   21.00
  -2   1  -5  351.16   23.80
   2   1   5  364.76   22.90
   3  -1   5  286.47   22.20
  -3  -1  -5  283.37   17.60
   3  -1   5  298.07   17.80
   3  -1   5  289.97   19.70
  -3  -1  -5  276.17   17.50
   3  -1   5  292.17   17.60
   3  -1   5  295.47   18.20
   3   1   5  262.07   18.70
  -3   1  -5  297.27   18.10
   3   1   5  289.77   20.20
   3   1   5  301.07   17.80
   3   1   5  285.37   19.30
   3   1   5  303.37   24.40
  -3   1  -5  279.17   22.20
   4  -1   5  477.25   33.90
   4  -1   5  488.75   28.30
   4  -1   5  456.05   29.70
   4  -1   5  461.55   28.00
   4  -1   5  449.16   27.20
  -4  -1  -5  486.15   27.20
  -4   1  -5  479.25   27.50
   4   1   5  462.95   30.10
   4   1   5  441.66   29.70
   4   1   5  487.95   27.40
   4   1   5  489.95   36.40
   5  -1   5   14.90    4.20
   5  -1   5   15.40    7.20
   5  -1   5   14.60    2.10
   5  -1   5   16.00    5.10
   5   1   5   21.50    8.40
   5   1   5   14.50    2.60
   5   1   5   13.60    4.70
   6  -1   5  242.58   19.20
   6  -1   5  201.78   20.50
   6  -1   5  254.67   24.50
   6   1   5  241.18   25.00
   6   1   5  263.57   19.80
   7  -1   5    0.40    7.20
   7  -1   5   -1.30    6.90
   7  -1   5    4.30    4.80
   7   1   5    2.00    5.60
   7   1   5    6.80    3.60
   9  -2  -5   25.00    8.60
   9   2  -5   29.10    7.60
   8  -2  -5  120.09   15.80
   8  -2  -5  126.29   14.20
   8   2  -5   90.89   13.40
   8   2  -5  113.29   15.30
   7  -2  -5   37.10    8.40
   7  -2  -5   47.90    6.60
   7  -2  -5   45.90    7.60
   7   2  -5   22.80    7.10
   7   2  -5   37.10    6.10
   7   2  -5   36.00    8.00
   6  -2  -5  601.04   34.00
   6  -2  -5  576.84   31.10
   6  -2  -5  558.44   31.20
   6  -2  -5  518.15   38.30
   6  -2  -5  559.54   37.20
  -6  -2   5  616.74   37.40
   6   2  -5  653.13   38.10
   6   2  -5  577.44   33.90
   6   2  -5  574.44   38.00
   6   2  -5  551.74   34.40
  -6   2   5  530.55   33.40
   5  -2  -5  695.93   40.00
  -5  -2   5  647.84   41.00
   5  -2  -5  658.63   43.10
   5  -2  -5  616.34   38.40
  -5  -2   5  653.33   41.70
   5   2  -5  738.73   39.20
   5   2  -5  740.63   40.70
   5   2  -5  688.43   41.40
   5   2  -5  573.34   41.60
   5   2  -5  668.53   39.60
  -5   2   5  685.13   38.40
   4  -2  -5  141.89   10.40
   4  -2  -5  135.49   13.20
  -4  -2   5  171.38   12.10
   4  -2  -5  150.58   11.40
  -4  -2   5  133.49   12.10
  -4  -2   5  135.49   11.70
   4   2  -5  131.39   11.20
  -4   2   5  155.28   10.50
   4   2  -5  119.39   11.40
   4   2  -5  171.28   14.00
   4   2  -5  131.79   10.60
   4   2  -5  147.99   10.90
   3  -2  -5 2177.28  123.49
  -3  -2   5 2286.17  123.49
  -3  -2   5 2233.38  124.49
   3  -2  -5 2128.29  125.79
   3  -2  -5 2161.28  124.49
  -3  -2   5 2382.06  125.79
  -3  -2   5 2232.18  124.79
   3   2  -5 2226.78  124.19
   3   2  -5 2511.45  124.89
   3   2  -5 2288.67  126.39
   3   2  -5 2239.98  124.19
  -3   2   5 2205.98  123.39
   3   2  -5 2495.25  124.19
  -2  -2   5  705.03   39.50
  -2  -2   5  663.53   37.70
   2  -2  -5  696.63   42.40
   2  -2  -5  683.73   39.80
  -2  -2   5  646.14   38.80
  -2  -2   5  710.33   40.40
  -2  -2   5  740.53   40.00
   2  -2  -5  628.44   39.80
   2  -2  -5  716.73   38.90
  -2   2   5  601.24   41.40
   2   2  -5  732.13   39.20
  -2   2   5  657.93   39.90
   2   2  -5  627.14   39.10
   2   2  -5  643.74   38.60
  -2   2   5  643.34   38.40
   2   2  -5  644.94   38.50
  -2   2   5  659.73   41.30
   2   2  -5  713.93   40.80
  -1  -2   5  205.08   14.00
   1  -2  -5  206.78   14.50
   1  -2  -5  216.68   14.90
   1  -2  -5  187.78   13.90
  -1  -2   5  183.18   14.60
  -1  -2   5  227.98   14.80
  -1  -2   5  186.08   14.40
  -1  -2   5  211.98   12.40
   1  -2  -5  188.28   16.50
   1  -2  -5  225.48   15.40
  -1   2   5  198.48   15.30
  -1   2   5  204.08   14.10
  -1   2   5  184.28   16.60
  -1   2   5  216.98   15.80
   1   2  -5  193.88   13.50
   1   2  -5  232.08   15.70
   1   2  -5  205.88   13.10
   1   2  -5  224.28   14.70
   1   2  -5  197.38   13.80
   0  -2   5 1206.58   62.79
   0  -2   5 1098.29   63.59
   0  -2  -5 1085.79   63.19
   0  -2   5 1077.19   62.79
   0  -2   5 1185.18   64.09
   0  -2  -5 1096.69   63.39
   0  -2   5 1121.19   63.99
   0  -2  -5 1090.19   66.69
   0  -2  -5 1101.29   64.39
   0  -2  -5 1198.28   63.49
   0  -2   5 1073.59   60.69
   0   2  -5 1073.59   62.19
   0   2   5 1177.88   63.39
   0   2  -5 1198.28   63.09
   0   2   5 1090.79   66.59
   0   2  -5 1161.28   61.29
   0   2   5 1077.59   63.59
   0   2  -5 1166.58   64.29
   0   2  -5 1217.68   63.49
   0   2   5 1092.49   64.69
   1  -2   5  869.51   45.30
  -1  -2  -5  776.82   46.20
  -1  -2  -5  809.22   46.40
  -1  -2  -5  807.12   46.10
   1  -2   5  823.52   43.50
   1  -2   5  755.22   45.90
   1  -2   5  802.72   47.00
   1  -2   5  789.32   46.30
  -1   2  -5  792.82   45.00
   1   2   5  798.72   46.20
   1   2   5  793.62   46.30
   1   2   5  806.72   46.60
   1   2   5  865.41   51.09
  -1   2  -5  753.42   46.40
   1   2   5  843.52   48.40
  -1   2  -5  830.82   46.70
   2  -2   5   54.69    4.10
   2  -2   5   53.69    7.20
   2  -2   5   51.69    6.30
  -2  -2  -5   63.19    6.70
  -2  -2  -5   62.19    6.80
   2  -2   5   47.00    4.60
   2  -2   5   51.39    7.10
   2  -2   5   62.19    5.40
   2   2   5   55.69    6.40
   2   2   5   60.89    7.20
   2   2   5   60.69    8.30
   2   2   5   67.39    7.00
   2   2   5   60.69   10.10
  -2   2  -5   63.49    8.00
  -2   2  -5   68.29    7.30
  -3  -2  -5 1111.59   59.69
   3  -2   5 1085.19   61.49
   3  -2   5 1095.29   58.09
   3  -2   5 1097.79   58.39
   3  -2   5 1018.20   62.19
  -3  -2  -5 1057.09   59.49
   3  -2   5 1073.29   59.59
   3   2   5 1047.20   59.59
  -3   2  -5  977.50   59.49
   3   2   5 1090.79   59.89
   3   2   5  993.10   60.89
   3   2   5 1059.89   62.49
   3   2   5 1051.39   66.29
   4  -2   5  183.58   14.30
   4  -2   5  147.99   11.10
   4  -2   5  154.58   11.50
  -4  -2  -5  180.68   12.00
   4  -2   5  157.78   15.30
   4  -2   5  154.88   11.50
  -4   2  -5  183.88   13.00
   4   2   5  163.88   14.70
   4   2   5  173.68   12.10
   4   2   5  154.58   14.90
   4   2   5  178.38   19.00
   4   2   5  187.18   13.10
   5  -2   5   67.39    9.30
   5  -2   5   78.99    7.80
   5  -2   5   65.99   11.40
   5   2   5   79.89   10.50
   5   2   5   81.69    6.90
   5   2   5   81.19   14.60
   6  -2   5   16.60    5.90
   6  -2   5    4.50    6.00
   6   2   5    6.00    8.60
   6   2   5    5.90    5.00
   6   2   5    9.10    2.40
   7  -2   5   28.10    7.50
   7  -2   5   50.49   12.80
   7   2   5   13.00   10.60
   8  -3  -5    3.60    2.90
   8  -3  -5    3.70    6.30
   8  -3  -5    1.30    3.40
   8   3  -5    3.80    9.10
   8   3  -5    4.00    5.30
   8   3  -5    5.50    5.80
   7  -3  -5  436.26   31.30
   7  -3  -5  361.46   23.00
   7   3  -5  364.76   29.00
   7   3  -5  332.87   27.80
   6  -3  -5  306.07   26.30
   6  -3  -5  293.97   20.20
  -6  -3   5  330.07   25.00
   6   3  -5  358.06   21.30
   6   3  -5  314.37   25.50
   6   3  -5  360.06   25.30
   5  -3  -5  638.04   39.50
  -5  -3   5  609.14   40.80
   5  -3  -5  582.44   36.80
  -5  -3   5  607.24   38.60
   5  -3  -5  775.62   44.10
   5   3  -5  630.24   40.80
   5   3  -5  666.43   38.40
   5   3  -5  707.03   37.80
  -5   3   5  612.44   36.70
   5   3  -5  592.64   41.50
   4  -3  -5  958.70   50.89
   4  -3  -5  831.52   52.49
  -4  -3   5  859.61   51.19
  -4  -3   5  828.02   52.49
   4  -3  -5  940.41   55.39
  -4  -3   5  894.21   54.09
   4   3  -5 1028.70   51.49
   4   3  -5  883.71   52.89
  -4   3   5  890.91   50.49
   4   3  -5  836.42   54.49
   4   3  -5  833.82   51.49
  -3  -3   5  400.46   26.50
  -3  -3   5  380.96   25.20
   3  -3  -5  375.16   27.00
  -3  -3   5  394.36   24.60
  -3  -3   5  420.76   27.80
   3  -3  -5  424.26   26.80
   3  -3  -5  388.96   24.70
   3   3  -5  411.66   25.60
   3   3  -5  373.16   25.60
   3   3  -5  387.86   25.60
  -3   3   5  403.86   21.70
  -3   3   5  418.16   24.70
   3   3  -5  409.16   28.10
  -2  -3   5   84.49   10.00
  -2  -3   5   97.89    7.80
   2  -3  -5  109.49   11.30
  -2  -3   5  104.29   11.30
   2  -3  -5   87.89    8.40
  -2  -3   5  102.29    9.50
   2  -3  -5   97.89    9.50
   2  -3  -5   87.99   10.30
  -2  -3   5   99.09    8.70
  -2   3   5   85.69   11.50
  -2   3   5  107.99    7.60
   2   3  -5   98.29    8.90
   2   3  -5   93.29    8.70
   2   3  -5   79.09   10.60
  -2   3   5   92.29    8.70
   2   3  -5  101.29    9.20
   1  -3  -5  215.38   15.80
  -1  -3   5  223.78   14.10
   1  -3  -5  211.38   16.20
   1  -3  -5  228.38   16.20
   1  -3  -5  270.17   18.30
  -1  -3   5  227.08   15.60
  -1  -3   5  256.87   17.40
  -1  -3   5  217.28   15.70
  -1  -3   5  206.68   16.40
  -1   3   5  227.38   17.80
  -1   3   5  198.08   16.30
   1   3  -5  225.48   17.30
   1   3  -5  193.28   15.20
   1   3  -5  215.68   14.80
  -1   3   5  195.58   17.70
  -1   3   5  233.38   16.00
   1   3  -5  214.48   14.70
   0  -3   5    3.80    2.60
   0  -3   5    6.40    3.60
   0  -3  -5    1.80    3.10
   0  -3  -5    7.80    3.60
   0  -3  -5    5.40    2.80
   0  -3   5    5.30    1.90
   0  -3   5   -2.70    2.50
   0   3   5    0.60    2.20
   0   3   5    7.40    4.20
   0   3  -5   -2.00    1.70
   0   3  -5    3.90    1.80
   0   3   5    4.00    2.80
   0   3  -5    1.00    1.60
   0   3   5    8.40    5.30
   0   3   5    8.80    3.50
   1  -3   5  494.55   28.90
  -1  -3  -5  492.15   31.50
   1  -3   5  533.85   30.00
   1  -3   5  503.75   28.70
  -1  -3  -5  475.35   30.90
  -1  -3  -5  491.15   30.00
   1  -3   5  482.35   31.40
   1  -3   5  465.55   31.20
   1   3   5  541.45   30.90
   1   3   5  477.95   33.00
   1   3   5  560.84   32.20
   1   3   5  529.95   31.60
  -1   3  -5  495.75   31.90
  -1   3  -5  521.35   29.20
   1   3   5  491.25   34.90
   2  -3   5  894.71   54.09
  -2  -3  -5 1046.50   54.39
   2  -3   5  967.50   52.89
  -2  -3  -5  884.71   54.29
   2  -3   5  925.01   52.19
   2  -3   5  896.01   54.79
   2  -3   5  982.80   52.29
   2   3   5  857.01   58.59
   2   3   5  934.21   54.79
  -2   3  -5  949.90   54.79
   2   3   5  909.91   56.69
   2   3   5  946.31   53.29
   2   3   5  915.41   54.29
   3  -3   5   27.20    5.40
   3  -3   5   24.60    4.20
   3  -3   5   31.60    5.30
  -3  -3  -5   32.60    5.60
   3  -3   5   26.40    6.10
   3  -3   5   29.50    3.70
   3   3   5   26.80    6.50
   3   3   5   29.10    4.50
  -3   3  -5   38.40    5.90
   3   3   5   35.20    5.90
   3   3   5   32.70    8.60
   3   3   5   23.20    6.80
   4  -3   5  476.65   27.60
   4  -3   5  444.16   30.90
   4  -3   5  454.55   28.30
  -4  -3  -5  487.25   29.30
   4  -3   5  481.75   31.70
   4   3   5  436.86   31.30
   4   3   5  477.65   29.50
   4   3   5  473.55   37.10
   5  -3   5    1.90    4.40
   5  -3   5    0.90    2.10
   5  -3   5    0.30    3.90
   5   3   5   -5.00    3.40
   5   3   5    4.30    6.00
   5   3   5    5.50    3.10
   6  -3   5  151.58   16.20
   6   3   5  140.79   11.50
   6   3   5  181.78   17.30
   6   3   5  156.68   24.60
   8  -4  -5   67.99   13.40
   8   4  -5   73.59   16.10
   8   4  -5   76.99   14.20
   8   4  -5   97.29   15.20
   7  -4  -5  512.95   37.30
   7   4  -5  431.76   34.70
   7   4  -5  449.06   33.60
   7   4  -5  468.35   40.20
  -6  -4   5  530.25   37.70
   6  -4  -5  579.54   40.00
   6   4  -5  518.25   37.20
   6   4  -5  580.04   42.60
   6   4  -5  520.95   39.00
   5  -4  -5  318.47   21.70
  -5  -4   5  307.47   23.00
   5  -4  -5  283.87   17.90
   5  -4  -5  244.18   23.00
  -5  -4   5  272.77   18.50
   5   4  -5  213.68   22.10
  -5   4   5  241.08   17.20
   5   4  -5  250.07   20.80
   4  -4  -5  116.19   14.20
  -4  -4   5  136.09   14.90
   4  -4  -5  128.29   10.00
   4  -4  -5   86.69   11.70
  -4  -4   5   98.89   12.00
  -4  -4   5  121.19    9.50
   4   4  -5  104.19   12.30
   4   4  -5   84.89   12.70
  -4   4   5   89.19    9.00
  -3  -4   5  103.99   11.60
  -3  -4   5   89.09    8.10
   3  -4  -5   75.19   10.80
   3  -4  -5   59.89    8.20
   3  -4  -5  101.49   12.40
  -3  -4   5   71.09   10.60
  -3   4   5   72.39    8.50
   3   4  -5   80.79   10.10
  -3   4   5   97.69    6.50
   3   4  -5   94.99   12.60
  -2  -4   5  843.92   55.79
  -2  -4   5  971.60   53.79
   2  -4  -5  949.11   55.89
   2  -4  -5 1010.80   55.29
   2  -4  -5  960.90   56.89
  -2  -4   5  900.61   56.09
  -2  -4   5  990.00   53.59
  -2   4   5  895.41   54.39
  -2   4   5  898.51   57.19
   2   4  -5  946.91   55.09
   2   4  -5  888.81   57.19
  -2   4   5  951.20   52.99
   1  -4  -5  798.22   45.70
  -1  -4   5  794.32   45.40
   1  -4  -5  691.23   44.30
  -1  -4   5  788.02   46.60
  -1  -4   5  813.72   43.40
  -1  -4   5  789.62   46.20
  -1   4   5  709.13   43.60
  -1   4   5  720.43   47.80
  -1   4   5  723.53   44.80
   1   4  -5  726.03   44.20
   1   4  -5  689.43   46.70
   1   4  -5  744.03   42.70
   0  -4   5   31.20    6.20
   0  -4   5   32.70    6.00
   0  -4  -5   26.40    4.90
   0  -4   5   23.40    4.30
   0  -4  -5   33.20    6.50
   0  -4   5   27.90    6.40
   0   4  -5   26.10    2.40
   0   4   5   33.40    5.90
   0   4   5   26.10    5.90
   0   4   5   28.20    7.90
   0   4   5   22.00    6.00
   0   4  -5   18.80    6.00
   0   4  -5   27.80    4.80
   0   4   5   40.40    6.10
   1  -4   5 1023.10   64.29
   1  -4   5 1101.19   61.69
  -1  -4  -5 1066.19   64.39
   1  -4   5 1130.69   62.69
   1  -4   5 1136.39   64.89
  -1  -4  -5 1058.19   61.79
   1   4   5 1105.59   63.29
   1   4   5 1105.59   64.29
   1   4   5 1023.00   64.19
  -1   4  -5 1188.58   65.49
   1   4   5 1250.97   69.59
   1   4   5 1058.99   66.39
   2  -4   5   21.30    5.40
   2  -4   5   19.50    1.90
   2  -4   5   16.70    3.70
   2  -4   5   19.40    5.90
  -2  -4  -5   12.00    4.30
   2  -4   5   16.70    3.60
  -2  -4  -5   24.40    4.00
  -2   4  -5   27.00    6.10
   2   4   5   18.80    7.60
   2   4   5   27.00    6.80
   2   4   5   18.50    7.00
   2   4   5   20.30    4.20
   2   4   5   30.00    6.20
   3  -4   5  471.75   29.30
  -3  -4  -5  409.46   29.50
   3  -4   5  464.05   28.30
   3  -4   5  433.86   26.90
   3  -4   5  468.85   26.70
   3  -4   5  458.65   31.00
   3   4   5  443.96   29.80
   3   4   5  433.66   32.80
  -3   4  -5  424.16   29.40
   3   4   5  425.66   27.30
   3   4   5  453.95   35.00
   3   4   5  519.45   32.00
   4  -4   5  428.36   30.60
   4  -4   5  437.56   28.20
   4  -4   5  470.35   29.20
  -4  -4  -5  423.76   29.90
   4   4   5  462.85   29.90
   4   4   5  474.55   32.30
   4   4   5  442.96   37.20
   5  -4   5   31.40    7.60
   5   4   5   21.20    5.10
   5   4   5   32.80   10.60
   5   4   5   30.10    7.90
   6  -4   5  205.48   18.90
   6   4   5  168.08   19.80
   6   4   5  225.38   28.50
   6   4   5  184.18   14.80
   8  -5  -5  214.48   24.60
   8   5  -5  124.29   19.60
   8   5  -5  207.58   28.40
   7  -5  -5   20.50    9.60
   7  -5  -5   23.60    4.10
   7   5  -5   24.60    9.80
   7   5  -5   16.00    7.60
   7   5  -5   14.50    8.70
   6  -5  -5  209.28   23.10
  -6  -5   5  186.48   20.50
   6  -5  -5  175.08   13.60
   6   5  -5  150.18   20.20
   6   5  -5  180.98   19.80
   6   5  -5  214.78   25.00
   5  -5  -5   73.59   13.30
   5  -5  -5   57.59    7.40
  -5  -5   5   74.09   12.10
   5   5  -5   45.60   10.90
   5   5  -5   61.19   12.50
   5   5  -5   62.69   10.90
  -5   5   5   57.19    7.10
  -4  -5   5   43.90    9.70
  -4  -5   5   55.99    9.90
  -4  -5   5   63.89    6.80
   4  -5  -5   33.40    8.30
   4  -5  -5   37.90    9.60
   4  -5  -5   57.79    8.00
  -4   5   5   58.59    4.50
   4   5  -5   72.09   12.50
   4   5  -5   57.79    9.80
  -4   5   5   44.10    6.80
   4   5  -5   52.89   11.00
  -3  -5   5  240.68   21.00
   3  -5  -5  243.18   20.80
  -3  -5   5  258.77   16.90
  -3  -5   5  224.38   19.80
   3  -5  -5  249.28   18.60
   3  -5  -5  208.78   19.70
   3   5  -5  265.57   22.90
   3   5  -5  272.57   20.90
  -3   5   5  218.38   17.40
   3   5  -5  236.28   19.50
  -3   5   5  236.58   15.60
   2  -5  -5  865.41   52.29
  -2  -5   5  823.02   52.99
   2  -5  -5  834.92   52.69
  -2  -5   5  770.82   53.39
  -2   5   5  871.71   49.80
   2   5  -5  848.42   52.09
   2   5  -5  793.82   54.69
  -2   5   5  965.90   55.29
  -2   5   5  960.40   52.39
   2   5  -5  881.71   51.69
   1  -5  -5  703.13   42.10
  -1  -5   5  635.24   42.40
  -1  -5   5  625.74   42.00
  -1  -5   5  621.74   39.00
   1  -5  -5  601.44   39.90
   1   5  -5  743.53   40.80
   1   5  -5  674.73   37.90
  -1   5   5  608.44   43.20
  -1   5   5  642.24   39.70
  -1   5   5  684.13   41.30
   1   5  -5  619.54   43.20
   0  -5   5   69.29   10.20
   0  -5  -5   95.19   11.50
   0  -5   5   74.49    8.70
   0  -5  -5   79.29    9.20
   0  -5   5   77.19    9.90
   0  -5   5   63.49   10.60
   0   5   5   96.49   11.60
   0   5   5   93.79   13.30
   0   5   5   96.49   11.60
   0   5  -5  103.49    9.30
   0   5  -5   86.19   12.50
   1  -5   5  182.68   16.50
   1  -5   5  181.68   14.90
   1  -5   5  177.88   13.90
  -1  -5  -5  185.28   16.10
  -1  -5  -5  170.98   13.20
   1  -5   5  186.58   16.50
   1   5   5  186.58   19.50
   1   5   5  166.38   14.70
   1   5   5  209.28   17.10
  -1   5  -5  186.88   17.00
   1   5   5  196.58   16.90
   2  -5   5   48.50    7.00
  -2  -5  -5   54.39    8.90
   2  -5   5   43.30    6.50
  -2  -5  -5   39.80    5.30
   2  -5   5   48.00    9.20
   2  -5   5   40.40    7.90
   2   5   5   58.59    7.30
   2   5   5   48.50    8.80
   2   5   5   22.40    8.10
  -2   5  -5   47.80    8.90
   2   5   5   50.09    9.10
   3  -5   5  199.88   16.10
  -3  -5  -5  151.78   17.00
   3  -5   5  182.68   18.70
   3   5   5  187.78   16.80
   3   5   5  175.78   17.50
   3   5   5  208.88   24.00
   4  -5   5   98.19   11.70
   4  -5   5   85.19   12.40
   4   5   5  100.99   18.10
   4   5   5  110.69   14.60
   4   5   5   73.59   10.80
   5  -5   5  304.77   25.90
   5  -5   5  371.36   24.10
   5   5   5  386.56   29.00
   5   5   5  318.17   24.80
   5   5   5  353.06   34.00
   6  -5   5  219.08   20.50
   6  -5   5  211.88   28.80
   6   5   5  193.08   17.10
   6   5   5  239.48   22.30
   6   5   5  202.38   28.00
   7  -6  -5  418.26   35.20
   7   6  -5  363.86   35.50
   7   6  -5  364.66   33.70
   7   6  -5  417.16   33.20
   6  -6  -5   37.60    6.10
   6  -6  -5   53.29   11.40
  -6  -6   5   40.60   10.20
   6   6  -5   43.00   12.20
   6   6  -5   28.60    8.30
   6   6  -5   45.50   11.40
   5  -6  -5   38.80   10.40
  -5  -6   5   55.19   10.10
   5  -6  -5   40.40    7.00
  -5  -6   5   56.09   10.80
   5   6  -5   55.29   12.40
   5   6  -5   56.49   10.80
   5   6  -5   40.90   11.40
  -4  -6   5  113.09   16.30
  -4  -6   5  124.49   15.40
   4  -6  -5  140.59   14.00
   4  -6  -5  123.69   17.00
   4   6  -5  141.49   16.50
   4   6  -5  144.99   19.00
   4   6  -5  129.49   16.70
  -4   6   5  137.59   12.70
  -3  -6   5  137.29   15.60
   3  -6  -5   87.59   11.90
   3  -6  -5  104.89   13.90
  -3  -6   5   81.09   13.50
  -3   6   5  103.29    9.00
   3   6  -5   97.29   13.00
  -3   6   5  106.39   11.90
   3   6  -5  106.19   16.10
   3   6  -5  103.79   13.50
  -3   6   5   93.99   13.90
  -2  -6   5  853.61   57.19
  -2  -6   5  872.61   56.29
   2  -6  -5  850.31   55.29
   2  -6  -5  885.41   55.49
  -2   6   5  902.31   57.09
   2   6  -5  891.61   53.69
  -2   6   5  964.30   53.39
  -2   6   5  901.81   54.89
   2   6  -5 1003.00   56.19
   2   6  -5  835.42   58.69
   1  -6  -5  647.14   40.90
  -1  -6   5  632.54   43.70
  -1  -6   5  665.23   43.30
   1  -6  -5  580.44   41.40
   1   6  -5  661.53   41.40
  -1   6   5  654.63   42.20
   1   6  -5  692.93   45.80
  -1   6   5  658.33   44.70
   1   6  -5  655.43   37.50
   0  -6   5   22.30    6.60
   0  -6  -5   32.10    5.90
   0  -6  -5   34.60    8.60
   0  -6   5   34.00    8.70
   0   6   5   37.70    7.50
   0   6  -5   37.00    7.40
   0   6   5   33.10    7.20
   0   6  -5   36.50    9.60
   0   6   5   42.10   10.10
  -1  -6  -5  429.06   27.50
  -1  -6  -5  436.26   31.90
   1  -6   5  517.75   33.00
   1  -6   5  450.65   30.20
   1  -6   5  427.26   30.90
   1   6   5  413.86   31.10
   1   6   5  425.66   34.30
  -1   6  -5  405.86   32.40
   1   6   5  438.56   31.50
   1   6   5  464.25   30.50
  -2  -6  -5  413.06   26.60
   2  -6   5  440.76   31.20
   2  -6   5  402.56   31.20
  -2  -6  -5  449.95   32.20
   2   6   5  507.55   32.90
   2   6   5  442.36   35.30
  -2   6  -5  419.06   32.40
   2   6   5  524.45   34.10
  -3  -6  -5   15.50    6.50
   3  -6   5   19.70    7.30
   3   6   5    9.90    6.40
   3   6   5   20.30    9.80
   3   6   5   20.60    6.50
   4  -6   5  430.26   33.00
   4  -6   5  474.05   31.70
   4   6   5  408.76   33.00
   4   6   5  478.25   38.70
   4   6   5  435.86   32.30
   5  -6   5  125.69   16.50
   5   6   5  129.29   14.90
   5   6   5  135.19   17.90
   5   6   5  109.29   19.90
   6  -7  -5    7.20    5.70
   6  -7  -5    9.90    4.40
   6   7  -5    9.30    8.00
   6   7  -5    9.60    8.50
   6   7  -5    6.30    6.70
   5  -7  -5  156.28   14.60
   5  -7  -5  153.38   20.10
  -5  -7   5  160.38   18.10
  -5  -7   5  183.48   21.40
   5   7  -5  131.29   18.10
   5   7  -5  152.98   20.60
   5   7  -5  170.98   22.10
  -4  -7   5  420.36   30.70
   4  -7  -5  350.46   30.40
  -4  -7   5  394.56   31.80
   4  -7  -5  357.26   26.50
   4   7  -5  343.87   31.40
   4   7  -5  345.37   28.90
  -4   7   5  380.36   26.50
   4   7  -5  366.36   30.00
  -3  -7   5   63.29   12.00
   3  -7  -5   48.00   10.70
  -3  -7   5   60.39   12.60
   3  -7  -5   69.19   10.70
  -3   7   5   63.79   11.70
  -3   7   5   43.00    8.20
   3   7  -5   57.49    9.80
   3   7  -5   48.60   10.10
   3   7  -5   57.59   13.10
   2  -7  -5  137.49   16.60
   2  -7  -5  133.79   16.30
  -2  -7   5  141.39   17.70
  -2  -7   5  155.68   18.90
   2   7  -5  143.09   13.50
   2   7  -5  140.89   19.80
   2   7  -5  177.28   16.60
  -2   7   5  166.98   17.60
  -2   7   5  156.38   14.70
  -1  -7   5   28.80    8.80
   1  -7  -5   39.90    9.80
   1  -7  -5   53.09    9.10
  -1  -7   5   32.70    8.10
   1   7  -5   70.19   13.50
  -1   7   5   42.50    9.50
   1   7  -5   45.80    9.20
  -1   7   5   42.40   10.70
   0  -7  -5  249.38   18.50
   0  -7  -5  255.07   22.30
   0  -7   5  190.68   22.00
   0  -7   5  248.48   22.00
   0   7   5  245.98   23.90
   0   7   5  229.48   21.50
   0   7   5  290.17   23.10
   0   7  -5  234.98   19.60
   0   7  -5  225.88   24.90
  -1  -7  -5  781.02   44.80
   1  -7   5  716.23   49.40
  -1  -7  -5  733.93   49.80
   1  -7   5  830.92   50.89
  -1   7  -5  761.52   51.89
   1   7   5  719.73   52.19
   1   7   5  760.32   50.19
   1   7   5  748.33   49.70
  -2  -7  -5  149.39   17.90
   2  -7   5  116.59   15.50
   2   7   5  115.19   16.50
   2   7   5  184.08   22.90
   2   7   5  132.19   16.40
   3  -7   5  103.79   15.00
   3  -7   5  134.49   17.30
  -3  -7  -5  129.09   16.60
   3   7   5  126.59   19.00
   3   7   5  140.79   18.30
   3   7   5  131.59   16.40
   4  -7   5  138.39   16.90
   4  -7   5  166.18   19.40
   4   7   5  142.49   17.10
   4   7   5  136.99   22.20
   4   7   5  156.38   20.00
   5  -7   5  110.69   16.40
   5   7   5  114.99   15.10
   5   7   5  117.29   17.30
   6  -8  -5   88.19   11.20
   6   8  -5  122.29   20.10
  -5  -8   5  171.78   23.70
   5  -8  -5  226.38   25.80
   5  -8  -5  188.18   17.70
   5   8  -5  208.38   26.60
   5   8  -5  193.28   22.70
   4  -8  -5    5.00    5.40
   4  -8  -5   13.20    6.50
  -4  -8   5   12.30    7.50
   4   8  -5    2.20    4.90
   4   8  -5    4.00    8.50
   4   8  -5    5.40    6.60
   3  -8  -5  377.36   30.80
   3  -8  -5  451.45   33.60
  -3  -8   5  482.25   35.00
   3   8  -5  360.36   35.00
  -3   8   5  431.66   31.70
   3   8  -5  470.95   34.00
  -3   8   5  444.86   33.40
   2  -8  -5   30.00    8.40
   2  -8  -5   39.00    9.10
  -2  -8   5   27.90    8.90
  -2   8   5   51.39    9.50
   2   8  -5   47.50   11.90
  -2   8   5   30.60    9.90
   2   8  -5   47.00    9.70
  -1  -8   5   45.70   10.40
   1  -8  -5   27.80    8.10
   1  -8  -5   59.99   10.10
   1   8  -5   41.50   12.10
  -1   8   5   59.09   12.20
  -1   8   5   28.30    7.70
   1   8  -5   34.10    8.70
   0  -8  -5  681.63   40.90
   0  -8   5  616.04   44.80
   0  -8  -5  633.54   45.10
   0   8  -5  710.13   42.80
   0   8   5  627.94   45.90
   0   8   5  592.94   44.20
   0   8   5  611.44   44.30
   0   8  -5  628.84   46.50
   1  -8   5  123.69   18.20
   1  -8   5   89.09   14.80
  -1  -8  -5  117.29   16.20
   1   8   5  100.09   16.60
  -1   8  -5  163.08   20.80
   1   8   5  119.59   16.80
   1   8   5  116.99   16.20
   2  -8   5  247.68   22.90
   2  -8   5  277.57   25.80
  -2  -8  -5  206.68   23.70
   2   8   5  263.27   26.00
   2   8   5  263.87   24.40
   2   8   5  252.27   24.50
   3  -8   5  135.69   18.40
   3  -8   5  142.09   18.60
  -3  -8  -5  147.89   19.00
   3   8   5  127.49   16.70
   3   8   5  125.89   21.00
   3   8   5  128.69   17.90
   4  -8   5   50.29   12.10
   4  -8   5   75.29   13.50
   4   8   5   66.59   14.70
   4   8   5   62.39   14.80
   4  -9  -5  288.17   24.60
  -4  -9   5  244.98   26.80
  -4  -9   5  253.57   31.40
   4  -9  -5  278.57   27.30
   4   9  -5  318.77   27.90
   4   9  -5  276.87   32.60
   3  -9  -5  135.49   17.40
  -3  -9   5  138.29   22.60
   3  -9  -5  185.38   20.90
  -3  -9   5  101.49   16.40
   3   9  -5  125.09   21.80
   3   9  -5  140.09   19.00
  -3   9   5  167.08   23.20
  -2  -9   5   29.00   11.70
   2  -9  -5   14.70    6.50
   2  -9  -5   14.80    7.50
  -2  -9   5   14.70    8.70
  -2   9   5   24.30    8.60
   2   9  -5   29.60   11.60
   2   9  -5   25.30    8.40
  -2   9   5   26.30    9.10
  -1  -9   5   10.00    9.90
  -1  -9   5   -1.40    5.70
   1  -9  -5   10.50    6.10
   1  -9  -5    8.70    5.40
   1   9  -5    4.90    6.00
  -1   9   5   -0.20    6.00
  -1   9   5    2.00    4.20
   1   9  -5   -6.40    6.80
   0  -9   5   96.69   17.90
   0  -9   5  119.39   16.70
   0  -9  -5  113.49   16.40
   0   9   5   78.19   15.50
   0   9  -5   96.59   13.60
   0   9   5   83.29   14.50
   0   9  -5  114.29   19.40
  -1  -9  -5  189.48   22.00
   1  -9   5  155.78   21.00
   1  -9   5  191.48   24.30
   1   9   5  122.19   19.00
   1   9   5  197.78   22.00
   1   9   5  222.88   25.80
   2  -9   5  152.38   19.40
  -2  -9  -5  134.69   18.60
   2  -9   5  176.98   22.40
   2   9   5  159.88   20.20
   2   9   5  129.99   19.40
   2   9   5  139.19   21.20
   3  -9   5   96.39   15.70
  -2 -10   5  151.88   24.40
   2 -10  -5   87.19   14.20
   2  10  -5  107.89   21.00
   2  10  -5  120.89   18.10
  -2  10   5  110.59   16.50
  -1 -10   5  219.08   27.70
  -1 -10   5  175.88   26.90
   1 -10  -5  186.48   22.30
  -1  10   5  169.78   22.50
  -1  10   5  212.58   23.50
   1  10  -5  204.68   22.80
   1  10  -5  200.48   26.40
   0 -10   5   -6.80    7.60
   0 -10  -5    7.90    8.00
   0  10   5    0.30    8.00
   0  10   5    5.70    6.90
   9   0  -6   17.60    6.00
   8   0  -6   27.50    7.00
   8   0  -6   30.50    7.10
   8   0  -6   31.10    6.90
   7   0  -6  566.54   36.80
   7   0  -6  559.24   36.40
   7   0  -6  555.84   36.60
   6   0  -6  300.77   21.30
   6   0  -6  290.47   17.50
   6   0  -6  253.57   18.10
   6   0  -6  284.77   20.40
   6   0  -6  271.77   20.20
  -6   0   6  268.97   19.70
   5   0  -6  193.08   13.30
   5   0  -6  208.18   14.70
   5   0  -6  188.18   11.90
   5   0  -6  168.68   14.20
  -5   0   6  172.28   13.90
   5   0  -6  182.98   15.00
   4   0  -6  410.06   28.00
  -4   0   6  493.95   27.60
   4   0  -6  434.16   27.10
   4   0  -6  441.46   26.70
   4   0  -6  443.96   27.40
   4   0  -6  432.56   24.80
  -3   0   6  137.49   10.30
   3   0  -6  138.29    8.40
   3   0  -6  129.49   11.00
  -3   0   6  129.09    9.10
   3   0  -6  123.89   10.20
   3   0  -6  129.79    9.90
   2   0  -6  458.75   30.10
  -2   0   6  453.75   27.10
  -2   0   6  443.96   26.50
  -2   0   6  452.45   27.10
   2   0  -6  424.56   27.10
  -2   0   6  465.55   28.90
   2   0  -6  486.15   25.70
   2   0  -6  469.75   27.10
   2   0  -6  419.36   28.00
   1   0  -6  139.49   13.40
  -1   0   6  155.38   12.60
  -1   0   6  156.88   11.00
   1   0  -6  159.98   11.50
   1   0  -6  148.99   12.40
   1   0  -6  156.18   11.40
  -1   0   6  181.88   11.90
  -1   0   6  182.68   14.40
  -1   0   6  160.08   11.20
   0   0  -6  621.24   39.10
   0   0  -6  623.74   36.20
   0   0   6  598.04   36.00
   0   0   6  710.33   39.90
   0   0  -6  590.64   37.70
   0   0  -6  593.04   34.30
   0   0   6  648.44   37.60
   0   0   6  627.54   36.50
   0   0   6  647.14   36.20
   0   0  -6  650.83   37.50
   1   0   6  650.73   38.20
   1   0   6  631.94   38.50
  -1   0  -6  688.73   41.90
  -1   0  -6  658.23   37.80
   1   0   6  660.43   37.80
   1   0   6  679.63   41.70
   2   0   6 1120.39   69.49
   2   0   6 1280.97   66.59
  -2   0  -6 1160.88   64.79
   2   0   6 1107.09   63.69
   2   0   6 1165.38   64.79
   2   0   6 1219.28   66.09
   3   0   6 1922.21  111.39
   3   0   6 1980.00  109.89
   3   0   6 2072.69  109.49
  -3   0  -6 2041.50  109.69
   3   0   6 2063.99  111.69
   3   0   6 2016.80  116.09
   4   0   6  255.07   15.90
   4   0   6  266.67   23.10
   4   0   6  254.67   17.70
   4   0   6  263.67   18.90
   5   0   6   17.60    4.60
   5   0   6    9.50    2.40
   5   0   6   10.00    4.30
   5   0   6   15.00    7.60
   6   0   6    6.30    7.70
   6   0   6    3.40    4.50
   9  -1  -6   49.10    9.60
   9   1  -6   52.79   10.30
   8  -1  -6   -2.30    4.00
   8  -1  -6    1.40    3.90
   8  -1  -6    6.20    4.80
   8   1  -6    2.70    5.00
   8   1  -6    2.40    3.80
   8   1  -6    3.80    5.80
   7  -1  -6  205.38   18.80
   7  -1  -6  229.58   18.30
   7  -1  -6  224.48   17.30
   7   1  -6  255.37   19.80
   7   1  -6  208.98   18.30
   6  -1  -6  214.08   15.70
  -6  -1   6  149.29   14.90
   6  -1  -6  157.58   14.60
   6  -1  -6  174.08   14.20
   6  -1  -6  159.78   16.00
   6   1  -6  187.18   13.40
   6   1  -6  194.38   15.20
   6   1  -6  180.18   16.40
   6   1  -6  197.88   13.80
   6   1  -6  191.18   15.70
  -6   1   6  232.58   14.80
   5  -1  -6   98.09   11.40
   5  -1  -6   81.29    8.70
   5  -1  -6  108.59    8.80
  -5  -1   6   94.19   10.40
   5   1  -6   86.79    9.60
   5   1  -6   79.89   10.30
   5   1  -6   74.69    8.00
   5   1  -6   92.99   10.20
  -5   1   6   90.69    8.00
   5   1  -6   80.19    7.80
  -4  -1   6  409.66   26.90
   4  -1  -6  372.56   27.40
  -4  -1   6  451.75   25.80
   4  -1  -6  395.66   25.90
   4  -1  -6  456.05   26.20
   4   1  -6  391.96   27.40
   4   1  -6  444.66   27.20
  -4   1   6  382.36   25.40
   4   1  -6  427.16   25.70
   4   1  -6  446.36   25.30
   4   1  -6  465.75   26.90
   3  -1  -6  400.46   27.80
  -3  -1   6  392.86   27.10
   3  -1  -6  408.36   26.70
  -3  -1   6  431.06   26.70
   3  -1  -6  455.35   26.60
  -3  -1   6  480.15   28.30
   3   1  -6  441.76   31.40
   3   1  -6  443.96   26.30
   3   1  -6  439.46   25.60
   3   1  -6  415.46   27.30
  -3   1   6  465.05   26.50
  -3   1   6  448.36   24.40
   3   1  -6  440.16   26.40
   3   1  -6  449.06   27.40
   2  -1  -6  446.56   27.90
  -2  -1   6  453.25   29.10
  -2  -1   6  459.45   27.90
  -2  -1   6  463.35   28.30
  -2  -1   6  421.46   28.20
   2  -1  -6  448.56   28.30
   2  -1  -6  457.55   29.40
   2  -1  -6  473.45   31.70
   2   1  -6  457.25   29.00
  -2   1   6  485.85   32.00
  -2   1   6  471.15   28.80
   2   1  -6  501.75   27.40
   2   1  -6  463.45   29.10
   2   1  -6  519.15   30.90
  -2   1   6  492.05   31.80
  -2   1   6  464.15   27.90
   2   1  -6  494.95   28.00
  -2   1   6  482.65   26.70
   2   1  -6  497.95   27.40
   1  -1  -6  733.83   43.00
   1  -1  -6  728.23   46.30
   1  -1  -6  736.63   43.00
  -1  -1   6  774.02   43.00
  -1  -1   6  739.03   44.20
  -1  -1   6  714.03   43.40
   1  -1  -6  749.92   43.80
  -1  -1   6  828.92   43.90
   1  -1  -6  724.63   44.10
  -1  -1   6  713.33   44.90
  -1   1   6  734.93   44.70
   1   1  -6  830.72   43.10
   1   1  -6  762.22   44.60
  -1   1   6  790.62   44.30
  -1   1   6  713.13   43.00
   1   1  -6  757.82   41.60
   1   1  -6  751.52   43.80
  -1   1   6  752.52   42.10
  -1   1   6  800.42   47.00
   1   1  -6  800.12   45.30
   1   1  -6  749.33   42.50
   0  -1   6  530.85   35.00
   0  -1  -6  559.14   37.10
   0  -1  -6  605.94   35.10
   0  -1  -6  594.94   33.10
   0  -1  -6  580.14   33.60
   0  -1   6  551.04   33.70
   0  -1   6  637.94   33.70
   0  -1   6  614.34   34.40
   0   1  -6  548.75   35.40
   0   1  -6  539.55   33.80
   0   1   6  567.84   34.70
   0   1   6  603.54   35.00
   0   1   6  531.55   36.90
   0   1   6  595.44   33.70
   1  -1   6  214.98   14.00
  -1  -1  -6  204.48   13.00
  -1  -1  -6  214.48   14.10
   1  -1   6  211.78   16.30
   1  -1   6  191.58   14.00
   1  -1   6  204.88   14.80
  -1   1  -6  213.48   14.40
   1   1   6  202.58   13.30
   1   1   6  236.98   15.70
   1   1   6  222.68   15.90
  -1   1  -6  200.58   16.00
   1   1   6  216.48   14.10
   1   1   6  219.48   18.50
   2  -1   6   54.19    5.70
   2  -1   6   34.10    4.80
   2  -1   6   39.40    7.40
  -2  -1  -6   39.20    3.80
   2  -1   6   43.70    6.30
  -2  -1  -6   41.50    4.90
  -2   1  -6   26.40    4.60
   2   1   6   24.80    5.60
   2   1   6   36.50    4.80
   2   1   6   27.20    4.30
  -2   1  -6   36.00    7.40
   2   1   6   45.10    9.40
   3  -1   6 1917.51  106.79
  -3  -1  -6 1992.10  106.09
   3  -1   6 1889.81  111.09
   3  -1   6 1854.71  108.09
  -3  -1  -6 1972.30  105.49
   3  -1   6 1868.81  105.29
   3  -1   6 1943.01  106.29
   3   1   6 1912.91  107.09
   3   1   6 2074.09  109.39
   3   1   6 2023.10  106.19
   3   1   6 1900.21  113.29
  -3   1  -6 2016.50  106.69
   4  -1   6  568.64   36.30
   4  -1   6  572.34   34.10
   4  -1   6  577.84   33.70
   4  -1   6  567.34   40.10
   4   1   6  598.44   33.50
   4   1   6  589.54   36.00
   4   1   6  586.44   42.50
   5  -1   6  124.79   13.80
   5  -1   6  129.89   17.90
   5  -1   6  143.29    9.90
   5   1   6  144.49   12.90
   5   1   6  149.99   10.10
   5   1   6  137.29   19.10
   6  -1   6   79.99   11.30
   6  -1   6   89.59   16.00
   6   1   6   99.79   11.40
   6   1   6  138.99   20.90
   9  -2  -6   22.80    7.60
   9   2  -6   12.30    6.10
   8  -2  -6  283.17   22.10
   8  -2  -6  287.87   24.10
   8   2  -6  260.17   24.40
   8   2  -6  288.77   24.00
   7  -2  -6   44.50    9.00
   7  -2  -6   27.40    6.50
   7  -2  -6   26.20    5.10
   7   2  -6   13.50    6.30
   7   2  -6   25.00    7.20
   7   2  -6   30.40    5.80
  -6  -2   6  363.56   27.10
   6  -2  -6  386.46   28.50
   6  -2  -6  396.96   24.40
   6   2  -6  322.37   27.20
  -6   2   6  351.56   23.70
   6   2  -6  440.86   25.60
   6   2  -6  394.96   27.30
  -5  -2   6  324.37   22.30
   5  -2  -6  303.87   20.40
   5  -2  -6  346.37   23.50
   5  -2  -6  258.87   18.60
  -5   2   6  274.47   18.40
   5   2  -6  287.07   21.10
   5   2  -6  279.67   19.70
   5   2  -6  311.77   19.30
   5   2  -6  288.17   19.80
   5   2  -6  272.87   22.20
  -4  -2   6  158.28   13.60
   4  -2  -6  163.98   12.90
   4  -2  -6  151.38   13.80
   4  -2  -6  169.08   11.80
  -4  -2   6  161.98   12.80
  -4  -2   6  160.88   14.50
   4   2  -6  152.48   14.50
   4   2  -6  162.88   13.00
   4   2  -6  167.78   12.30
   4   2  -6  145.89   12.10
   4   2  -6  152.38   11.80
  -4   2   6  161.78   11.50
  -3  -2   6 1282.77   74.59
  -3  -2   6 1247.68   74.59
   3  -2  -6 1357.86   75.99
  -3  -2   6 1303.07   75.59
   3  -2  -6 1336.27   74.99
   3  -2  -6 1232.48   73.39
   3   2  -6 1333.37   73.79
  -3   2   6 1382.66   73.59
   3   2  -6 1412.46   73.69
   3   2  -6 1186.98   74.09
   3   2  -6 1443.36   76.69
   3   2  -6 1377.86   74.19
  -2  -2   6   28.40    4.60
  -2  -2   6   35.40    5.70
  -2  -2   6   22.20    4.70
   2  -2  -6   21.40    4.70
   2  -2  -6   28.20    5.30
  -2  -2   6   27.80    5.30
   2  -2  -6   34.30    4.90
   2   2  -6   29.60    5.50
  -2   2   6   26.10    2.70
  -2   2   6   26.20    4.60
   2   2  -6   29.50    5.50
   2   2  -6   24.00    5.50
   2   2  -6   39.20    5.10
   2   2  -6   24.60    4.30
   2   2  -6   23.80    4.20
  -2   2   6   29.10    6.90
   1  -2  -6  614.24   38.20
   1  -2  -6  600.04   37.20
  -1  -2   6  583.54   37.90
   1  -2  -6  724.33   38.40
   1  -2  -6  609.24   38.80
  -1  -2   6  594.14   38.00
  -1  -2   6  644.14   37.10
   1   2  -6  608.24   38.40
  -1   2   6  692.03   39.60
  -1   2   6  746.53   39.80
   1   2  -6  650.43   38.40
  -1   2   6  592.94   37.10
  -1   2   6  735.53   42.10
   1   2  -6  630.94   36.10
   1   2  -6  603.24   36.80
   0  -2   6  338.57   20.50
   0  -2  -6  310.67   20.90
   0  -2  -6  360.66   22.10
   0  -2   6  341.27   21.70
   0  -2  -6  368.06   21.50
   0  -2   6  325.37   21.40
   0  -2   6  332.77   22.10
   0   2   6  299.07   24.40
   0   2  -6  334.77   21.60
   0   2   6  325.47   21.10
   0   2   6  352.76   22.20
   0   2  -6  297.17   21.50
   0   2   6  308.27   22.30
  -1  -2  -6  149.39   10.90
   1  -2   6  130.89   11.00
   1  -2   6  128.79   11.30
  -1  -2  -6  134.99   10.50
  -1  -2  -6  145.59   11.50
   1  -2   6  144.19   10.00
   1  -2   6  148.39   11.80
   1   2   6  154.58   15.50
   1   2   6  130.29   10.90
   1   2   6  137.59   14.00
   1   2   6  121.29   10.90
  -1   2  -6  121.49   11.00
   1   2   6  137.09   10.80
  -1   2  -6  139.39   11.50
   2  -2   6   53.89    3.70
  -2  -2  -6   55.89    6.70
   2  -2   6   52.29    7.90
   2  -2   6   60.69    7.10
   2  -2   6   57.99    7.80
  -2  -2  -6   60.79    6.50
   2  -2   6   59.89    3.60
   2  -2   6   58.89    6.00
  -2   2  -6   58.39    8.60
   2   2   6   69.99    9.30
  -2   2  -6   61.99    7.50
   2   2   6   54.59   10.80
   2   2   6   44.30    6.10
   2   2   6   54.99    7.00
   2   2   6   57.19    7.20
   3  -2   6  373.56   21.20
   3  -2   6  367.56   25.20
   3  -2   6  343.27   25.50
   3  -2   6  341.97   23.10
   3  -2   6  358.36   22.10
  -3  -2  -6  380.26   22.90
  -3  -2  -6  377.26   22.70
   3   2   6  360.66   24.40
   3   2   6  386.56   26.50
   3   2   6  372.26   23.00
   3   2   6  340.77   29.50
  -3   2  -6  365.96   23.60
   4  -2   6    4.80    2.90
   4  -2   6    3.60    4.00
   4  -2   6    2.90    2.20
   4  -2   6    6.00    5.30
   4   2   6    4.90    2.60
   4   2   6    8.80    3.90
   4   2   6   -4.60    6.20
   5  -2   6  133.29    9.70
   5  -2   6  149.88   15.30
   5  -2   6  192.48   18.10
   5   2   6  135.89   10.60
   5   2   6  119.49   19.10
   5   2   6  156.48   14.30
   6  -2   6  342.57   30.60
   6  -2   6  386.46   27.80
   6   2   6  373.96   34.30
   6   2   6  368.16   22.10
   8  -3  -6  146.49   15.60
   8  -3  -6  143.69   18.20
   8   3  -6  127.49   17.70
   8   3  -6  147.39   18.20
   7  -3  -6  421.56   33.50
   7   3  -6  445.56   34.50
   7   3  -6  551.34   31.90
   7   3  -6  422.96   32.90
   6  -3  -6   49.70    9.30
  -6  -3   6   23.20    7.60
   6  -3  -6   31.50    5.10
   6   3  -6   47.70    6.50
   6   3  -6   53.69   10.30
   6   3  -6   34.30    7.80
   5  -3  -6   56.49    6.60
   5  -3  -6   50.69    8.10
  -5  -3   6   47.90    7.50
  -5  -3   6   45.20    8.80
   5  -3  -6   60.39   10.30
   5   3  -6   58.29    7.30
   5   3  -6   49.70    9.50
  -5   3   6   58.79    6.50
   5   3  -6   59.79    9.30
  -4  -3   6   60.69    9.50
   4  -3  -6   42.00    6.00
   4  -3  -6   69.09    9.20
   4  -3  -6   65.99    9.70
  -4  -3   6   50.29    8.20
  -4  -3   6   46.60    6.80
  -4   3   6   58.39    6.70
   4   3  -6   69.89    8.80
   4   3  -6   64.59    9.80
   4   3  -6   51.49    6.90
  -3  -3   6    3.60    3.50
   3  -3  -6    2.30    2.60
   3  -3  -6    2.10    2.40
   3  -3  -6    1.50    3.30
  -3  -3   6    0.40    2.50
  -3  -3   6    4.90    4.20
   3   3  -6    3.90    4.40
  -3   3   6    3.40    1.10
  -3   3   6    2.20    0.70
  -3   3   6    2.90    2.60
   3   3  -6    1.10    2.70
   2  -3  -6 1208.78   67.89
  -2  -3   6 1159.88   64.09
  -2  -3   6 1086.29   67.29
   2  -3  -6 1138.29   66.99
   2  -3  -6 1190.98   65.79
  -2  -3   6 1219.98   67.29
  -2   3   6 1185.48   65.69
   2   3  -6 1144.59   66.59
  -2   3   6 1119.79   63.99
   2   3  -6 1163.08   65.49
   2   3  -6 1109.79   68.19
  -2   3   6 1192.08   69.99
  -1  -3   6 1814.62   98.19
   1  -3  -6 1665.03   97.19
  -1  -3   6 1705.23   94.09
  -1  -3   6 1708.73   95.99
   1  -3  -6 1789.52   96.69
  -1  -3   6 1624.34   97.29
   1  -3  -6 1800.62   97.09
   1   3  -6 1668.03   95.19
   1   3  -6 1834.12   96.19
  -1   3   6 1829.92   96.59
   1   3  -6 1704.93   98.59
  -1   3   6 1689.43  100.49
   0  -3  -6  591.14   35.50
   0  -3   6  606.64   36.40
   0  -3   6  535.75   36.00
   0  -3   6  575.04   32.30
   0  -3   6  592.84   34.50
   0  -3  -6  544.75   34.80
   0  -3  -6  633.54   35.90
   0   3  -6  569.34   32.90
   0   3   6  548.35   35.10
   0   3   6  540.85   37.20
   0   3  -6  607.14   34.10
   0   3   6  678.63   40.80
   0   3  -6  552.04   36.50
   0   3   6  558.34   35.90
   1  -3   6  580.74   34.20
   1  -3   6  535.25   29.30
   1  -3   6  511.75   30.80
  -1  -3  -6  493.45   32.00
   1  -3   6  519.45   33.10
   1  -3   6  496.95   31.00
  -1  -3  -6  512.75   32.00
  -1  -3  -6  522.05   32.50
   1   3   6  527.25   32.70
   1   3   6  538.45   32.60
  -1   3  -6  499.75   33.20
  -1   3  -6  563.04   31.60
   1   3   6  534.05   33.00
   1   3   6  512.85   37.20
   1   3   6  569.44   35.90
   2  -3   6  207.18   17.30
   2  -3   6  244.68   16.30
   2  -3   6  206.88   17.60
  -2  -3  -6  258.27   17.00
   2  -3   6  242.18   14.40
  -2  -3  -6  254.57   17.50
   2  -3   6  224.98   15.20
   2   3   6  249.38   17.40
  -2   3  -6  211.08   17.40
   2   3   6  240.08   16.90
   2   3   6  242.28   20.30
   2   3   6  242.68   17.80
   2   3   6  232.38   21.70
   3  -3   6   40.80    7.00
   3  -3   6   50.69    4.50
   3  -3   6   56.09    5.80
   3  -3   6   47.40    5.50
   3  -3   6   52.69    9.00
   3  -3   6   53.89    7.80
   3   3   6   55.59    8.70
   3   3   6   47.80    6.50
   3   3   6   49.30    9.80
   3   3   6   50.69    7.00
  -3   3  -6   47.20    7.20
   3   3   6   51.79   11.80
   4  -3   6  292.87   21.90
   4  -3   6  249.48   16.70
   4  -3   6  292.97   21.30
   4  -3   6  245.88   18.10
   4   3   6  315.57   28.00
   4   3   6  265.57   21.50
   4   3   6  277.27   18.60
   5  -3   6  214.58   18.30
   5   3   6  204.28   18.20
   5   3   6  189.38   25.50
   5   3   6  210.18   15.10
   6  -3   6  435.76   31.10
   6   3   6  423.26   26.00
   6   3   6  419.16   39.00
   8  -4  -6   33.90   10.10
   8   4  -6   23.20    7.90
   8   4  -6   43.20   14.40
   8   4  -6   21.60    9.80
   7  -4  -6  288.27   26.10
   7  -4  -6  268.57   18.30
   7   4  -6  275.07   23.80
   7   4  -6  279.57   29.60
   7   4  -6  246.08   26.20
   6  -4  -6  190.28   20.90
  -6  -4   6  196.38   20.30
   6  -4  -6  179.18   13.20
   6   4  -6  175.68   20.50
   6   4  -6  161.98   18.10
  -5  -4   6  436.06   29.30
  -5  -4   6  451.85   33.00
   5  -4  -6  459.25   28.50
   5  -4  -6  431.16   32.20
  -5  -4   6  456.75   31.00
   5  -4  -6  486.95   34.30
   5   4  -6  458.65   32.00
   5   4  -6  518.65   35.00
  -5   4   6  469.55   28.30
  -4  -4   6 1118.89   68.99
  -4  -4   6 1206.38   68.29
   4  -4  -6 1134.59   65.19
   4  -4  -6 1183.28   69.39
  -4  -4   6 1117.89   66.89
   4  -4  -6 1156.08   68.59
   4   4  -6 1098.79   67.29
  -4   4   6 1188.18   65.19
   4   4  -6 1120.09   70.09
  -3  -4   6   48.40    9.20
   3  -4  -6   33.80    8.10
   3  -4  -6   47.20    8.20
   3  -4  -6   50.09    7.00
  -3  -4   6   30.10    7.30
   3   4  -6   39.00    9.10
   3   4  -6   50.49    7.90
  -3   4   6   48.40    6.60
  -3   4   6   64.19   10.70
  -3   4   6   43.50    4.40
   2  -4  -6  184.18   14.80
   2  -4  -6  193.38   15.70
  -2  -4   6  194.78   16.20
  -2  -4   6  175.58   16.30
  -2  -4   6  201.38   13.70
  -2   4   6  175.98   14.80
   2   4  -6  198.78   15.30
  -2   4   6  200.38   13.90
  -2   4   6  226.68   19.10
   2   4  -6  186.08   17.40
  -1  -4   6  362.66   25.20
  -1  -4   6  326.07   24.10
   1  -4  -6  310.07   23.00
  -1  -4   6  334.47   20.90
   1  -4  -6  311.17   22.70
   1   4  -6  328.77   21.00
  -1   4   6  335.27   22.00
   1   4  -6  319.97   25.40
  -1   4   6  367.56   23.60
  -1   4   6  355.96   27.20
   1   4  -6  359.26   22.30
   0  -4  -6  528.95   33.10
   0  -4   6  510.15   33.80
   0  -4   6  484.55   31.50
   0  -4  -6  485.15   31.40
   0  -4   6  494.55   29.80
   0  -4   6  454.25   32.80
   0   4  -6  521.75   29.00
   0   4  -6  489.65   34.40
   0   4  -6  493.45   30.30
   0   4   6  558.34   33.10
   0   4   6  639.44   38.70
   1  -4   6  849.12   47.30
   1  -4   6  832.42   48.50
  -1  -4  -6  801.62   50.39
   1  -4   6  782.12   50.69
   1  -4   6  887.61   51.89
  -1  -4  -6  799.32   48.50
   1   4   6  843.52   50.49
   1   4   6  829.62   54.69
   1   4   6  875.41   50.29
  -1   4  -6  900.41   52.29
   1   4   6  856.31   51.09
  -2  -4  -6  160.68   14.20
   2  -4   6  172.28   14.60
   2  -4   6  173.68   12.10
   2  -4   6  171.88   11.70
   2  -4   6  160.68   14.70
  -2  -4  -6  156.98   12.50
   2  -4   6  164.28   10.20
   2   4   6  146.69   19.50
  -2   4  -6  150.48   15.70
   2   4   6  151.78   14.80
   2   4   6  169.98   19.10
   2   4   6  134.69   12.50
   2   4   6  152.08   14.00
   3  -4   6   29.30    7.70
  -3  -4  -6   39.80    7.00
   3  -4   6   50.59    7.80
   3  -4   6   46.10    5.80
   3   4   6   52.29    8.20
   3   4   6   54.59    9.90
   3   4   6   47.70   11.30
   4  -4   6  635.14   42.90
   4   4   6  643.14   43.30
   4   4   6  729.43   50.79
   4   4   6  670.03   41.10
   5  -4   6   63.09   11.00
   5   4   6   58.59    8.00
   5   4   6   58.09   15.20
   5   4   6   70.59   11.80
   6  -4   6  159.68   18.10
   6   4   6  149.29   12.40
   6   4   6  128.29   22.30
   8  -5  -6   25.60   10.30
   8  -5  -6   11.00    3.50
   8   5  -6    0.20    7.90
   8   5  -6    3.30    8.00
   7  -5  -6   17.80    8.10
   7  -5  -6   17.50    4.00
   7   5  -6   23.20   10.50
   7   5  -6   15.00    6.60
   7   5  -6   14.80    8.20
   6  -5  -6  482.85   31.20
   6  -5  -6  482.95   37.80
  -6  -5   6  503.65   37.60
   6   5  -6  535.35   40.00
   6   5  -6  491.35   40.60
   6   5  -6  579.94   37.70
  -5  -5   6  386.26   29.80
  -5  -5   6  364.36   27.40
   5  -5  -6  332.67   23.90
   5  -5  -6  414.36   30.80
   5   5  -6  346.47   27.70
   5   5  -6  342.57   30.30
   5   5  -6  362.36   31.10
  -5   5   6  404.76   24.30
   4  -5  -6  251.97   22.50
  -4  -5   6  235.28   22.20
  -4  -5   6  296.87   22.30
   4  -5  -6  254.27   18.80
  -4   5   6  251.17   18.20
   4   5  -6  284.27   24.40
   4   5  -6  249.78   20.90
   3  -5  -6  438.36   29.60
  -3  -5   6  525.75   34.00
  -3  -5   6  439.56   31.90
   3  -5  -6  456.45   31.70
   3   5  -6  399.96   33.00
  -3   5   6  453.65   29.40
  -3   5   6  457.75   27.00
  -3   5   6  452.75   33.90
   3   5  -6  434.26   30.80
   2  -5  -6   41.30    7.80
   2  -5  -6   34.60    7.20
  -2  -5   6   38.60    8.10
  -2  -5   6   42.60    8.60
  -2   5   6   42.00    7.00
  -2   5   6   39.20    6.30
   2   5  -6   58.49   10.60
   2   5  -6   48.50    8.00
  -2   5   6   45.80    9.20
  -1  -5   6  223.68   19.40
  -1  -5   6  209.28   18.30
   1  -5  -6  207.58   16.20
  -1  -5   6  197.18   14.90
   1  -5  -6  187.58   17.00
   1   5  -6  185.08   18.20
   1   5  -6  201.78   14.00
   1   5  -6  183.88   15.60
  -1   5   6  232.88   17.60
   1   5  -6  209.48   13.60
  -1   5   6  213.88   20.60
   0  -5  -6  937.91   55.69
   0  -5   6 1077.99   59.99
   0  -5   6  903.21   58.69
   0  -5   6  922.11   54.59
   0  -5  -6 1025.00   58.59
   0   5   6  939.31   57.89
   0   5  -6 1037.10   60.69
   0   5   6  880.81   57.29
   0   5   6  973.10   61.99
   1  -5   6  151.98   16.50
  -1  -5  -6  164.98   12.50
   1  -5   6  139.59   16.00
   1  -5   6  159.48   12.20
   1  -5   6  163.18   13.50
  -1  -5  -6  158.48   14.60
   1   5   6  142.69   15.30
   1   5   6  140.59   18.30
   1   5   6  151.28   15.30
  -1   5  -6  165.88   17.50
  -2  -5  -6  510.75   36.90
   2  -5   6  552.54   38.10
   2  -5   6  559.24   37.40
  -2   5  -6  569.44   38.40
   2   5   6  560.34   37.20
   2   5   6  545.05   38.00
   2   5   6  583.44   35.60
   2   5   6  677.93   44.40
   3  -5   6   45.90    9.60
   3  -5   6   46.70    7.90
  -3  -5  -6   58.89    8.80
   3   5   6   52.59    8.60
   3   5   6   26.20    9.40
   3   5   6   40.10    8.90
   4  -5   6  213.48   21.40
   4   5   6  207.78   17.90
   4   5   6  225.78   20.40
   4   5   6  203.68   26.30
   5  -5   6   85.69   13.40
   5   5   6  111.29   20.10
   5   5   6   90.49   14.30
   5   5   6   93.99   11.30
   7  -6  -6  173.98   22.60
   7  -6  -6  153.38   12.90
   7   6  -6  195.68   24.30
   7   6  -6  164.18   24.30
   7   6  -6  141.69   19.30
   6  -6  -6   21.50    4.90
  -6  -6   6    9.90    7.10
   6  -6  -6   28.30    9.50
   6   6  -6   13.20    7.10
   6   6  -6   16.50    9.10
   6   6  -6   45.00   12.40
   5  -6  -6  295.77   20.40
  -5  -6   6  254.47   23.80
   5  -6  -6  268.57   24.40
  -5  -6   6  265.47   23.40
   5   6  -6  261.47   23.20
   5   6  -6  261.77   25.10
   5   6  -6  279.17   28.70
   4  -6  -6  675.03   40.50
  -4  -6   6  617.54   44.50
  -4  -6   6  635.14   42.60
   4  -6  -6  622.74   43.90
   4   6  -6  633.04   42.90
  -4   6   6  614.94   39.20
   4   6  -6  595.74   43.20
   4   6  -6  701.33   47.50
   3  -6  -6   40.10    8.80
  -3  -6   6   61.39   10.90
   3  -6  -6   44.90    7.40
  -3  -6   6   25.10    9.10
   3   6  -6   45.30    9.10
  -3   6   6   40.10    7.30
  -3   6   6   28.60    9.30
   3   6  -6   51.39    9.50
   3   6  -6   45.90   11.30
   2  -6  -6  337.37   24.40
   2  -6  -6  295.97   23.30
  -2  -6   6  320.67   24.90
  -2  -6   6  290.97   25.70
   2   6  -6  297.27   23.50
  -2   6   6  313.17   25.70
  -2   6   6  305.37   23.40
   2   6  -6  327.07   22.10
   2   6  -6  295.57   27.10
   1  -6  -6   32.90    8.00
   1  -6  -6   43.60    7.60
  -1  -6   6   38.20    8.80
  -1  -6   6   47.60    8.80
   1   6  -6   31.00    4.10
   1   6  -6   48.70   11.10
  -1   6   6   31.50    8.70
   1   6  -6   34.50    7.10
  -1   6   6   38.50    8.00
   0  -6   6  281.77   24.10
   0  -6  -6  279.07   23.10
   0  -6   6  301.37   24.80
   0  -6  -6  307.97   21.30
   0   6   6  290.17   23.60
   0   6  -6  286.87   21.10
   0   6   6  257.27   22.40
   0   6  -6  307.07   26.30
   0   6   6  379.66   28.90
   1  -6   6  428.26   30.90
  -1  -6  -6  403.26   25.70
  -1  -6  -6  369.76   29.30
   1  -6   6  357.46   28.90
  -1   6  -6  377.36   30.60
   1   6   6  413.46   33.30
   1   6   6  377.66   28.70
   1   6   6  458.95   30.90
   2  -6   6  553.24   39.80
  -2  -6  -6  607.64   41.30
   2  -6   6  594.64   41.40
   2   6   6  627.44   42.10
   2   6   6  678.13   47.40
   2   6   6  631.34   40.90
   3  -6   6   74.19   12.70
   3  -6   6   71.89   11.10
  -3  -6  -6   82.19   12.60
   3   6   6  119.59   15.60
   3   6   6   65.39   15.60
   3   6   6   68.79   10.70
   4  -6   6  381.96   29.90
   4  -6   6  347.07   27.20
   4   6   6  395.36   30.90
   4   6   6  378.86   35.50
   4   6   6  339.17   26.70
   5  -6   6  109.39   15.60
   5   6   6  116.59   14.00
   5   6   6  166.28   28.00
  -6  -7   6   57.29   14.50
   6  -7  -6   49.50    7.90
   6  -7  -6   55.99   13.90
   6   7  -6   64.59   12.30
   6   7  -6   90.49   17.40
   6   7  -6   56.19   13.50
   5  -7  -6   16.00    5.70
  -5  -7   6    9.60    7.30
   5  -7  -6   16.30    8.60
  -5  -7   6   28.00    8.70
   5   7  -6   13.60   10.10
   5   7  -6   18.60    8.70
   5   7  -6   18.70    8.00
  -4  -7   6   56.29   11.40
  -4  -7   6   65.39   12.50
   4  -7  -6   49.99   11.70
   4  -7  -6   38.90    7.50
   4   7  -6   49.20   10.40
   4   7  -6   63.29   14.30
   4   7  -6   44.80   10.40
  -4   7   6   58.99    9.30
   3  -7  -6   40.50    9.40
  -3  -7   6   61.09   11.80
  -3  -7   6   50.29   11.20
   3  -7  -6   49.30    9.30
   3   7  -6   49.60   10.30
   3   7  -6   37.30    8.00
  -3   7   6   63.69    9.70
  -3   7   6   48.60   11.70
   3   7  -6   59.49   13.80
  -2  -7   6  806.42   54.99
  -2  -7   6  965.10   57.69
   2  -7  -6  795.32   52.99
   2  -7  -6  823.42   53.39
   2   7  -6  939.31   59.29
   2   7  -6  872.31   53.99
  -2   7   6  850.51   53.39
  -2   7   6  790.92   55.69
   1  -7  -6  248.18   22.30
  -1  -7   6  280.07   24.30
   1  -7  -6  246.58   19.90
  -1  -7   6  252.27   23.50
  -1   7   6  239.48   21.20
  -1   7   6  312.57   26.40
   1   7  -6  253.07   20.90
   1   7  -6  230.98   26.30
   0  -7   6  191.78   20.50
   0  -7  -6  229.38   16.40
   0  -7  -6  177.38   19.30
   0  -7   6  162.98   19.50
   0   7  -6  202.28   22.90
   0   7   6  160.28   17.80
   0   7   6  173.38   21.60
   0   7  -6  182.38   15.90
   1  -7   6  210.28   21.90
  -1  -7  -6  167.78   19.50
  -1  -7  -6  191.38   14.90
   1  -7   6  189.28   20.80
  -1   7  -6  190.08   21.90
   1   7   6  228.88   19.90
   1   7   6  178.48   23.20
   1   7   6  196.98   20.90
   2  -7   6  242.38   22.20
  -2  -7  -6  195.18   21.40
   2  -7   6  207.08   19.90
   2   7   6  230.98   21.30
   2   7   6  189.88   24.60
   2   7   6  275.37   23.20
  -3  -7  -6   52.99   11.10
   3  -7   6   54.29   11.50
   3  -7   6   37.50    9.80
   3   7   6   25.30    7.70
   3   7   6   48.40    9.10
   3   7   6   51.09   14.20
   4  -7   6  293.47   26.50
   4  -7   6  295.87   26.00
   4   7   6  341.27   32.60
   4   7   6  324.77   25.90
   4   7   6  311.17   27.20
   5  -8  -6   53.39   12.50
  -5  -8   6   59.39   12.70
   5  -8  -6   47.60    9.00
   5   8  -6   49.90   15.10
   5   8  -6   57.29   12.20
   5   8  -6   83.09   17.50
   4  -8  -6   -3.40    6.00
  -4  -8   6   10.10    6.00
  -4  -8   6    8.50    6.80
   4   8  -6    6.00    6.90
   4   8  -6   -2.60    8.20
   3  -8  -6  220.58   21.50
  -3  -8   6  236.88   26.00
  -3  -8   6  212.38   23.70
   3  -8  -6  218.38   20.00
   3   8  -6  177.18   24.90
  -3   8   6  225.78   23.20
  -3   8   6  251.37   20.70
   3   8  -6  214.68   21.10
   2  -8  -6   77.59   13.00
  -2  -8   6   96.39   16.20
   2  -8  -6   88.89   13.00
  -2  -8   6  110.29   15.90
  -2   8   6   85.99   14.40
  -2   8   6   93.69   13.20
   2   8  -6  100.99   14.40
   2   8  -6   59.79   15.20
  -1  -8   6  129.69   17.60
  -1  -8   6  145.69   18.70
   1  -8  -6  108.69   13.40
   1  -8  -6   98.59   14.90
   1   8  -6  137.59   20.50
  -1   8   6  130.99   18.40
  -1   8   6   89.59   13.90
   1   8  -6  115.69   15.10
   0  -8  -6   49.90   10.90
   0  -8   6   27.00    8.50
   0  -8  -6   29.50    6.50
   0  -8   6   34.80    9.90
   0   8   6   29.20    8.60
   0   8   6   42.80   12.00
   0   8  -6   31.60   11.20
   0   8  -6   44.00    8.80
   1  -8   6  184.08   21.50
  -1  -8  -6  190.78   21.50
   1   8   6  173.38   22.40
   1   8   6  174.68   20.40
   2  -8   6  117.59   16.30
   2  -8   6   79.99   15.20
  -2  -8  -6  102.39   15.30
   2   8   6  120.29   16.60
   2   8   6  101.29   15.90
   2   8   6  112.49   18.90
   3  -8   6  135.99   18.50
   3  -8   6  128.09   18.50
   3   8   6  116.59   20.30
   3   8   6  143.99   17.40
   3   8   6  164.58   20.80
  -4  -9   6    7.50    7.90
   4  -9  -6   21.90    8.20
   4  -9  -6   11.70    7.80
   4   9  -6   16.70   10.30
   4   9  -6   17.60    8.40
  -3  -9   6   31.20   10.80
   3  -9  -6   50.99   11.50
   3  -9  -6   57.59   11.80
   3   9  -6   40.20   13.40
  -3   9   6   41.50    9.10
  -3   9   6   47.80   11.40
   3   9  -6   61.69   12.90
   2  -9  -6  276.67   24.60
   2  -9  -6  265.47   23.20
  -2  -9   6  347.77   28.50
  -2   9   6  280.57   25.10
   2   9  -6  269.67   31.70
   2   9  -6  256.17   24.70
  -2   9   6  256.37   26.10
   1  -9  -6   86.99   12.30
  -1  -9   6   91.39   16.00
   1  -9  -6   80.59   13.50
  -1   9   6  113.09   18.00
   1   9  -6   71.99   13.50
   1   9  -6   73.29   16.80
  -1   9   6   84.99   13.60
   0  -9   6   14.90    8.90
   0  -9   6   26.70    9.30
   0  -9  -6   12.90    8.20
   0   9   6   20.40    8.70
   0   9   6   25.90   10.10
  -1  -9  -6   52.09   12.70
   1  -9   6   76.99   14.50
   1  -9   6   46.70   13.90
   1   9   6   56.39   12.30
   1   9   6   68.99   12.70
   1   9   6   59.39   15.00
  -2  -9  -6    8.60    7.10
   2  -9   6    7.00    7.50
   2  -9   6    6.70    8.80
   2   9   6    8.00    6.30
   2   9   6    7.00    9.80
   9   0  -7   51.19   10.30
   8   0  -7  474.15   31.10
   8   0  -7  375.46   29.30
   8   0  -7  415.66   29.80
   7   0  -7  525.05   34.10
   7   0  -7  511.95   33.80
   7   0  -7  471.05   33.50
  -6   0   7  234.98   16.60
   6   0  -7  175.18   15.70
   6   0  -7  172.68   15.50
   6   0  -7  217.78   16.80
   5   0  -7  425.46   29.00
  -5   0   7  419.36   28.50
   5   0  -7  462.15   27.90
   5   0  -7  460.35   28.80
   5   0  -7  461.05   25.30
   5   0  -7  461.15   29.90
   4   0  -7   21.80    2.60
   4   0  -7   29.60    5.30
   4   0  -7   32.20    6.00
   4   0  -7   25.70    4.40
  -4   0   7   26.70    3.60
   4   0  -7   17.50    3.80
  -4   0   7   21.40    4.40
   3   0  -7    1.00    1.70
  -3   0   7    1.70    1.80
   3   0  -7    5.60    2.90
   3   0  -7    0.60    1.80
   3   0  -7    0.70    3.30
  -3   0   7    1.30    2.30
   3   0  -7    2.50    1.10
  -2   0   7 1437.76   81.19
   2   0  -7 1447.96   82.79
  -2   0   7 1551.14   80.69
   2   0  -7 1412.76   81.39
  -1   0   7  916.31   56.19
  -1   0   7  978.50   53.59
  -1   0   7  968.10   53.19
   1   0  -7  850.11   54.19
  -1   0   7  958.60   52.79
   1   0  -7  956.10   53.39
   1   0  -7  917.21   56.19
   0   0  -7    3.30    2.50
   0   0  -7    6.20    3.50
   0   0   7    4.60    2.80
   0   0  -7    3.10    1.10
   0   0   7    8.30    4.60
   0   0   7    2.30    1.80
   0   0   7    3.70    2.80
   1   0   7 2109.89  116.39
  -1   0  -7 2198.88  116.69
   1   0   7 2136.59  117.59
   1   0   7 2082.89  117.09
   1   0   7 2145.59  120.89
  -2   0  -7   48.60    6.10
   2   0   7   57.19    7.20
   2   0   7   61.69   10.80
   2   0   7   56.79    6.20
   2   0   7   66.79    8.10
   3   0   7  316.47   24.60
   3   0   7  263.97   19.30
   3   0   7  260.77   17.50
  -3   0  -7  284.37   17.70
   3   0   7  248.48   19.70
   3   0   7  269.87   16.90
   4   0   7  239.78   15.50
   4   0   7  242.58   18.10
   4   0   7  215.98   22.20
   5   0   7    8.50    3.00
   5   0   7    9.00    4.90
   5   0   7   13.80    8.20
   6   0   7  505.55   33.70
   6   0   7  480.55   39.40
   9  -1  -7   82.89   11.70
   9  -1  -7  105.19   13.80
   9   1  -7   79.89   12.60
   8  -1  -7   92.49   12.10
   8  -1  -7   99.59   13.20
   8  -1  -7   74.39   10.60
   8   1  -7  100.09   13.80
   8   1  -7  106.29   13.60
   8   1  -7   69.79   10.30
   7  -1  -7  168.08   14.40
   7  -1  -7  170.58   14.90
   7  -1  -7  164.98   15.90
   7   1  -7  152.28   16.80
   7   1  -7  143.39   14.10
   7   1  -7  157.58   15.30
   6  -1  -7 1026.70   63.99
  -6  -1   7 1167.58   63.99
   6  -1  -7 1119.19   62.29
   6   1  -7 1027.80   62.39
   6   1  -7 1065.79   62.99
   6   1  -7 1033.10   64.19
  -6   1   7 1049.09   61.59
  -5  -1   7  640.84   36.00
   5  -1  -7  535.55   33.50
   5  -1  -7  526.85   33.60
   5  -1  -7  501.85   35.20
   5   1  -7  529.35   32.00
   5   1  -7  548.95   35.70
   5   1  -7  532.45   34.10
  -5   1   7  599.04   33.70
   5   1  -7  538.95   32.90
   5   1  -7  556.94   34.80
  -4  -1   7  424.36   26.70
   4  -1  -7  459.35   27.60
   4  -1  -7  482.35   27.50
   4  -1  -7  410.66   28.50
  -4  -1   7  421.66   28.10
   4   1  -7  420.16   27.10
   4   1  -7  425.66   28.10
   4   1  -7  410.86   26.50
   4   1  -7  441.76   29.00
   4   1  -7  449.56   25.60
  -4   1   7  426.76   26.60
  -3  -1   7   43.40    6.50
   3  -1  -7   42.80    6.20
   3  -1  -7   39.90    5.30
  -3  -1   7   40.10    5.50
   3  -1  -7   40.10    6.60
   3   1  -7   36.20    4.40
   3   1  -7   37.00    5.00
  -3   1   7   29.10    3.70
   3   1  -7   37.30    6.60
   3   1  -7   34.30    5.80
  -3   1   7   43.00    5.60
   2  -1  -7  209.18   15.20
  -2  -1   7  239.18   16.40
  -2  -1   7  258.07   16.30
   2  -1  -7  268.07   17.60
  -2   1   7  223.28   14.20
  -2   1   7  231.98   15.50
   2   1  -7  222.28   16.90
  -2   1   7  224.98   18.90
   2   1  -7  243.18   18.30
   2   1  -7  227.38   16.60
   2   1  -7  224.78   14.40
   2   1  -7  198.58   14.10
  -1  -1   7  672.73   40.60
   1  -1  -7  758.72   40.70
  -1  -1   7  738.73   41.60
   1  -1  -7  712.63   42.20
  -1  -1   7  755.02   41.50
   1  -1  -7  740.23   41.00
  -1  -1   7  631.54   42.70
  -1   1   7  626.74   44.10
   1   1  -7  707.53   41.60
   1   1  -7  694.63   39.90
  -1   1   7  667.03   39.70
  -1   1   7  752.62   41.00
  -1   1   7  686.93   41.80
   1   1  -7  661.53   42.50
   1   1  -7  706.43   38.80
   1   1  -7  727.13   43.40
   0  -1  -7  874.21   53.29
   0  -1   7  903.41   52.29
   0  -1   7  839.52   53.59
   0  -1  -7  871.91   50.59
   0  -1  -7  899.71   51.69
   0  -1   7  955.90   51.69
   0  -1   7  902.91   51.99
   0   1   7  918.51   56.09
   0   1   7  888.51   53.09
   0   1  -7  922.71   52.29
   0   1   7  939.81   51.19
   0   1   7  971.00   51.79
   0   1  -7  918.21   54.29
  -1  -1  -7  103.49    7.00
   1  -1   7  100.09    8.50
   1  -1   7   98.59   10.10
  -1  -1  -7   81.49    8.00
   1  -1   7   93.69    8.30
   1  -1   7   86.09   10.60
  -1   1  -7   97.09   11.90
   1   1   7  105.49    8.70
   1   1   7   97.59   13.20
  -1   1  -7   96.89    8.80
   1   1   7  102.69   11.10
   1   1   7   91.89    8.00
  -2  -1  -7   23.00    4.00
   2  -1   7   24.00    4.80
   2  -1   7   20.70    4.30
  -2  -1  -7   24.30    3.10
   2  -1   7   21.30    4.10
   2  -1   7   12.10    5.50
   2   1   7   16.70    3.70
  -2   1  -7   20.50    4.30
   2   1   7   28.20    4.50
   2   1   7   15.00    4.40
   2   1   7   20.10    6.70
  -3  -1  -7  637.54   38.60
   3  -1   7  791.62   43.30
   3  -1   7  634.14   40.90
   3  -1   7  638.84   39.20
   3  -1   7  657.43   44.20
   3  -1   7  690.03   37.10
   3   1   7  700.03   39.00
   3   1   7  606.04   45.20
  -3   1  -7  665.33   39.50
   3   1   7  746.83   44.50
   3   1   7  662.83   39.20
   4  -1   7  381.76   27.00
   4  -1   7  391.26   24.90
   4  -1   7  464.35   32.20
   4   1   7  411.86   24.60
   4   1   7  404.66   26.20
   4   1   7  397.96   32.70
   4   1   7  403.46   26.90
   5  -1   7  209.58   18.20
   5  -1   7  249.38   23.10
   5   1   7  181.88   23.70
   5   1   7  227.98   14.60
   5   1   7  226.98   18.00
   6  -1   7   81.89   11.50
   6  -1   7   88.99   16.30
   6   1   7   66.19    9.90
   6   1   7   72.49   15.70
   8  -2  -7  127.79   14.60
   8  -2  -7  134.59   16.80
   8  -2  -7  161.68   13.50
   8   2  -7  166.38   18.50
   8   2  -7  104.99   15.50
   7  -2  -7   85.99   10.70
   7  -2  -7   99.09   10.50
   7  -2  -7   76.69   12.30
   7   2  -7   91.29   13.70
   7   2  -7   86.79   10.10
   7   2  -7   74.49   11.60
  -6  -2   7  375.06   25.10
   6  -2  -7  275.17   20.80
   6  -2  -7  351.06   25.30
  -6   2   7  306.07   20.70
   6   2  -7  342.87   22.30
   6   2  -7  300.67   23.10
   6   2  -7  279.97   24.20
   5  -2  -7   74.69   10.90
   5  -2  -7   76.29    9.10
  -5  -2   7   47.80    8.50
   5  -2  -7   53.19    7.10
  -5  -2   7   54.19    7.70
   5   2  -7   59.49    8.20
  -5   2   7   73.69    7.40
   5   2  -7   70.59    8.10
   5   2  -7   69.29    9.30
   5   2  -7   67.69   10.70
   4  -2  -7  395.76   24.50
   4  -2  -7  370.76   27.10
  -4  -2   7  391.46   25.40
   4  -2  -7  430.56   26.40
  -4  -2   7  374.66   26.80
  -4   2   7  412.06   24.50
   4   2  -7  365.36   24.20
   4   2  -7  374.46   25.30
   4   2  -7  403.86   25.70
   4   2  -7  361.66   26.90
  -3  -2   7 1514.25   84.29
   3  -2  -7 1499.05   85.09
   3  -2  -7 1470.35   84.19
  -3  -2   7 1408.06   82.89
   3  -2  -7 1576.24   82.29
   3   2  -7 1439.46   81.99
   3   2  -7 1487.65   81.69
  -3   2   7 1481.35   79.19
   3   2  -7 1431.86   84.59
  -3   2   7 1437.56   81.79
   3   2  -7 1450.95   83.29
  -2  -2   7  158.38   13.30
  -2  -2   7  164.98   13.40
   2  -2  -7  177.28   12.60
   2  -2  -7  170.88   13.70
   2   2  -7  166.28   14.20
   2   2  -7  161.78   11.60
  -2   2   7  157.28   10.40
   2   2  -7  142.89   13.30
  -2   2   7  161.88   12.30
   2   2  -7  161.08   13.70
   2   2  -7  177.18   12.00
  -2   2   7  154.78   15.50
  -1  -2   7  185.58   14.50
   1  -2  -7  221.78   14.70
  -1  -2   7  170.78   14.30
   1  -2  -7  209.28   15.30
  -1  -2   7  192.98   13.60
   1  -2  -7  182.28   13.60
   1   2  -7  187.48   15.10
   1   2  -7  191.88   12.20
   1   2  -7  198.58   15.60
  -1   2   7  188.28   13.80
  -1   2   7  169.28   16.60
   0  -2   7  276.27   19.50
   0  -2   7  275.97   19.60
   0  -2   7  273.67   19.90
   0  -2  -7  259.47   19.50
   0  -2  -7  271.27   18.50
   0  -2   7  278.77   18.30
   0  -2  -7  324.37   19.10
   0   2   7  290.37   18.90
   0   2   7  303.37   21.40
   0   2  -7  280.07   19.90
   0   2  -7  288.67   20.30
   0   2   7  284.87   23.20
  -1  -2  -7   59.29    7.10
  -1  -2  -7   80.59    7.00
   1  -2   7   77.79    9.10
   1  -2   7   72.89    8.30
   1  -2   7   70.39    6.50
   1  -2   7   71.49    9.00
  -1  -2  -7   63.49    8.50
   1   2   7   70.89    9.70
  -1   2  -7   73.09    8.50
   1   2   7   60.89    7.20
  -1   2  -7   73.49    9.20
   1   2   7   64.19   11.60
   1   2   7   65.59    7.40
  -2  -2  -7  541.05   31.30
   2  -2   7  531.75   33.80
   2  -2   7  568.84   33.00
  -2  -2  -7  505.55   31.70
   2  -2   7  565.74   31.60
   2  -2   7  509.55   34.20
  -2   2  -7  537.65   33.20
   2   2   7  524.55   32.00
   2   2   7  529.35   32.30
  -2   2  -7  531.75   34.70
   2   2   7  530.25   35.30
   2   2   7  486.75   37.60
   3  -2   7  236.78   16.50
   3  -2   7  195.08   18.00
  -3  -2  -7  227.28   15.30
  -3  -2  -7  253.87   16.80
   3  -2   7  196.78   17.00
   3   2   7  190.38   16.10
   3   2   7  224.68   21.90
   3   2   7  223.08   15.30
  -3   2  -7  222.78   18.10
   4  -2   7   92.59   11.50
   4  -2   7   57.69    7.50
   4  -2   7   66.49   11.20
   4   2   7   64.69    7.10
   4   2   7   67.09    8.90
   4   2   7   50.29   12.50
   5  -2   7   93.29   12.40
   5  -2   7   99.19   14.30
   5   2   7  102.49    8.60
   5   2   7   81.09   15.50
   6  -2   7  336.57   26.20
   6   2   7  320.77   32.70
   8  -3  -7    6.50    3.70
   8  -3  -7    4.00    5.90
   8  -3  -7    8.80    5.10
   8   3  -7   -4.90    5.50
   8   3  -7    7.60    6.10
   7  -3  -7   59.69   11.10
   7  -3  -7   70.99    7.90
   7   3  -7   37.80    9.10
   7   3  -7   43.90    9.50
   7   3  -7   35.90    6.70
  -6  -3   7   15.10    5.50
   6  -3  -7   20.40    7.10
   6  -3  -7   11.70    3.50
   6   3  -7   14.70    5.20
   6   3  -7   17.50    7.40
   6   3  -7   12.80    4.40
   5  -3  -7  422.96   29.90
  -5  -3   7  465.85   30.80
   5  -3  -7  369.86   27.80
  -5  -3   7  389.56   27.40
   5  -3  -7  403.16   25.70
   5   3  -7  479.75   27.60
   5   3  -7  408.46   28.30
  -5   3   7  380.46   25.40
   5   3  -7  386.66   30.10
   4  -3  -7  575.94   36.90
  -4  -3   7  554.84   36.00
   4  -3  -7  534.05   34.10
  -4  -3   7  661.33   38.90
   4  -3  -7  585.94   37.50
  -4   3   7  593.94   34.40
   4   3  -7  557.84   35.70
   4   3  -7  547.65   35.10
   4   3  -7  531.15   38.00
   3  -3  -7  114.29    9.40
   3  -3  -7  113.89   12.40
  -3  -3   7  105.29   11.40
  -3  -3   7   78.99   10.80
   3   3  -7  106.09    9.50
  -3   3   7   86.09    5.80
  -3   3   7   81.49    8.70
  -3   3   7   85.99    6.50
   3   3  -7   97.79   12.70
  -2  -3   7  464.25   29.00
   2  -3  -7  426.76   27.10
  -2  -3   7  418.26   29.10
   2  -3  -7  435.06   28.60
  -2  -3   7  430.26   25.30
   2   3  -7  411.16   26.70
  -2   3   7  457.15   27.30
  -2   3   7  411.06   31.40
   2   3  -7  424.86   29.70
   2   3  -7  417.06   28.00
  -1  -3   7  207.18   16.70
  -1  -3   7  222.18   13.30
  -1  -3   7  193.68   17.10
   1  -3  -7  233.68   17.10
   1  -3  -7  239.88   17.10
   1  -3  -7  229.08   16.00
  -1   3   7  215.08   19.60
   1   3  -7  222.18   18.30
   1   3  -7  196.48   15.50
   1   3  -7  216.68   14.50
  -1   3   7  226.38   15.90
   0  -3  -7  326.37   23.50
   0  -3   7  345.97   22.50
   0  -3   7  392.06   25.50
   0  -3  -7  344.57   23.60
   0  -3  -7  339.57   23.80
   0  -3   7  367.96   19.90
   0  -3   7  334.77   24.50
   0   3   7  374.66   28.30
   0   3  -7  392.36   23.40
   0   3  -7  364.86   25.60
   0   3   7  360.16   23.60
  -1  -3  -7  674.93   41.40
   1  -3   7  632.44   41.90
   1  -3   7  644.74   43.00
  -1  -3  -7  676.63   41.60
   1  -3   7  706.83   40.60
  -1  -3  -7  683.43   41.30
   1  -3   7  764.02   40.60
   1   3   7  655.43   46.90
  -1   3  -7  669.43   41.10
   1   3   7  696.93   41.50
   1   3   7  890.81   49.60
   1   3   7  664.03   41.40
  -1   3  -7  692.23   43.30
   2  -3   7  853.11   58.09
  -2  -3  -7 1009.60   56.99
   2  -3   7  981.80   55.39
  -2  -3  -7 1063.19   56.79
   2  -3   7 1043.70   58.19
   2  -3   7  953.60   56.49
   2   3   7 1013.30   57.09
   2   3   7 1090.69   61.79
  -2   3  -7  961.80   58.09
   2   3   7  928.41   57.29
   2   3   7  994.30   63.79
  -2   3  -7  931.31   57.19
  -3  -3  -7 1909.21  104.79
   3  -3   7 1978.50  108.09
   3  -3   7 1887.91  105.79
   3  -3   7 1666.73  105.39
   3   3   7 2100.59  114.79
   3   3   7 1810.02  104.69
   3   3   7 1954.60  106.69
   4  -3   7  247.68   21.60
   4  -3   7  264.27   19.10
   4  -3   7  249.68   23.80
   4   3   7  277.77   21.10
   4   3   7  256.17   26.80
   4   3   7  271.17   18.60
   5  -3   7   37.50    9.00
   5   3   7   34.50   12.90
   5   3   7   29.20    5.10
   6  -3   7  125.99   16.00
   6   3   7  106.29    9.60
   6   3   7  116.09   19.90
   8  -4  -7   98.89   15.90
   8  -4  -7   73.09    8.90
   8   4  -7   75.99   14.70
   8   4  -7   97.39   19.10
   8   4  -7   90.19   14.60
   7  -4  -7  296.07   26.40
   7  -4  -7  269.77   19.80
   7   4  -7  330.57   27.40
   7   4  -7  296.57   25.00
   6  -4  -7    2.40    6.30
  -6  -4   7    2.20    5.70
   6  -4  -7    7.60    3.40
   6   4  -7   13.80    7.40
   6   4  -7    0.70    4.30
  -5  -4   7   42.50    8.60
   5  -4  -7   51.19    6.90
  -5  -4   7   50.79    9.00
   5  -4  -7   48.90    9.40
   5   4  -7   43.60    8.90
   5   4  -7   78.29   12.50
  -5   4   7   60.29    7.40
  -4  -4   7  385.86   28.50
   4  -4  -7  387.46   27.60
   4  -4  -7  313.07   23.30
  -4  -4   7  380.16   26.90
   4   4  -7  415.46   26.60
   4   4  -7  338.57   28.20
  -4   4   7  370.56   23.90
   3  -4  -7  455.65   30.10
   3  -4  -7  454.15   27.90
  -3  -4   7  438.86   31.00
  -3  -4   7  420.96   29.70
  -3   4   7  410.96   24.80
  -3   4   7  407.96   27.30
  -3   4   7  393.36   31.60
   3   4  -7  395.76   30.90
   3   4  -7  476.45   29.10
   2  -4  -7  541.55   35.10
   2  -4  -7  551.34   34.00
  -2  -4   7  533.15   36.40
  -2  -4   7  527.55   31.70
  -2  -4   7  513.75   35.30
   2   4  -7  488.55   36.70
  -2   4   7  638.04   39.70
   2   4  -7  586.74   34.20
  -2   4   7  577.24   34.00
  -2   4   7  488.35   32.10
   2   4  -7  508.65   33.40
  -1  -4   7  227.28   14.20
   1  -4  -7  204.78   16.40
  -1  -4   7  229.18   18.50
  -1  -4   7  229.88   18.80
   1  -4  -7  208.38   16.80
  -1   4   7  188.98   20.70
   1   4  -7  204.98   19.00
   1   4  -7  224.38   15.30
   1   4  -7  239.28   15.70
  -1   4   7  187.38   15.90
   0  -4  -7   89.19   10.50
   0  -4   7   97.79    9.90
   0  -4  -7   90.09   10.00
   0  -4   7   96.69   12.00
   0  -4   7  102.49   12.20
   0  -4   7   94.39    6.90
   0   4  -7   76.19    6.90
   0   4   7   81.59   13.90
   0   4  -7   83.99    7.40
   0   4  -7   80.29   11.80
   0   4   7   84.79    9.90
   1  -4   7   85.09   11.40
  -1  -4  -7   67.89    9.10
   1  -4   7   58.89    5.50
  -1  -4  -7   74.89    8.80
   1  -4   7   52.39    9.30
   1  -4   7   75.69    8.00
  -1   4  -7   86.89   11.60
   1   4   7   89.39   10.30
  -1   4  -7   73.19    6.10
   1   4   7   60.29   12.90
   1   4   7   74.59    9.50
  -2  -4  -7  831.12   47.40
   2  -4   7  719.83   48.40
   2  -4   7  677.73   47.10
   2  -4   7  772.12   43.50
  -2   4  -7  771.52   48.50
   2   4   7  715.63   46.60
   2   4   7  839.32   48.40
   2   4   7  899.41   55.69
   3  -4   7   71.99   10.70
   3  -4   7   68.59    9.90
  -3  -4  -7   75.99    9.50
   3   4   7   83.79   11.10
   3   4   7   53.09   12.20
   3   4   7   79.39    9.70
   4  -4   7  177.18   14.80
   4  -4   7  160.68   18.10
   4   4   7  165.28   14.30
   4   4   7  209.18   25.70
   4   4   7  192.18   18.10
   5  -4   7   78.89   12.70
   5   4   7   65.19    8.40
   5   4   7   69.19   16.50
   7  -5  -7  180.88   21.50
   7  -5  -7  179.98   13.60
   7   5  -7  156.88   23.10
   7   5  -7  148.89   19.00
   7   5  -7  148.29   22.00
   6  -5  -7  230.48   23.00
  -6  -5   7  156.18   20.20
   6  -5  -7  158.08   13.60
   6   5  -7  202.98   21.00
   6   5  -7  180.58   22.20
   6   5  -7  182.28   23.80
  -5  -5   7   50.69   10.90
  -5  -5   7   47.60    9.60
   5  -5  -7   61.79    7.80
   5  -5  -7   72.19   11.80
   5   5  -7   74.99   13.30
  -5   5   7   44.70    7.00
   5   5  -7   54.59   10.10
  -4  -5   7   24.90    7.70
  -4  -5   7   30.70    8.30
   4  -5  -7   39.50    6.80
   4  -5  -7   37.20    8.50
   4   5  -7   26.30    7.10
  -4   5   7   43.90    7.00
   4   5  -7   38.50   10.60
   3  -5  -7  311.67   21.90
  -3  -5   7  355.66   26.60
  -3  -5   7  293.17   24.40
   3  -5  -7  327.07   23.90
   3   5  -7  273.57   25.70
  -3   5   7  312.27   26.30
  -3   5   7  297.37   21.80
  -3   5   7  299.67   20.50
   3   5  -7  321.77   23.50
   2  -5  -7   47.20    7.50
  -2  -5   7   60.59    9.90
   2  -5  -7   60.99    9.30
  -2  -5   7   68.39   11.50
  -2   5   7   37.70    9.40
  -2   5   7   49.40    8.00
  -2   5   7   64.89    7.90
   2   5  -7   59.39    7.70
   2   5  -7   49.00   10.80
   2   5  -7   57.49    8.50
  -1  -5   7  857.11   56.49
  -1  -5   7  919.91   52.19
   1  -5  -7  890.91   55.09
  -1  -5   7  796.12   56.09
   1  -5  -7 1043.60   55.69
   1   5  -7  887.31   58.29
  -1   5   7  855.21   54.69
   1   5  -7  987.00   54.19
  -1   5   7  922.11   60.29
   1   5  -7  950.50   51.79
   0  -5  -7  156.18   13.80
   0  -5  -7  139.89   12.60
   0  -5   7  189.18   18.10
   0  -5   7  161.38   11.30
   0  -5   7  167.28   17.20
   0   5   7  117.99   17.40
   0   5   7  138.99   13.30
   0   5  -7  123.79   10.80
   0   5  -7  119.29   15.90
   1  -5   7   27.10    5.70
  -1  -5  -7   23.90    6.20
  -1  -5  -7   29.90    5.60
   1  -5   7   27.90    8.10
   1  -5   7   29.20    7.70
   1   5   7   23.90    6.80
   1   5   7   27.30    6.70
   1   5   7   38.60   10.30
  -1   5  -7   30.30    8.10
   2  -5   7  302.67   25.40
  -2  -5  -7  328.97   21.70
   2  -5   7  301.07   24.30
  -2  -5  -7  310.87   23.50
   2   5   7  321.87   23.80
   2   5   7  334.87   30.30
   2   5   7  317.97   24.80
   3  -5   7  126.69   14.60
   3  -5   7  144.19   17.20
  -3  -5  -7  124.49   14.00
   3   5   7  136.49   14.30
   3   5   7  134.89   16.10
   3   5   7  147.39   20.30
   4  -5   7   16.60    7.30
   4  -5   7   11.80    5.30
   4   5   7    8.90    5.70
   4   5   7   -1.00    4.10
   4   5   7    1.30    8.60
   5  -5   7   73.09   13.30
   5   5   7  101.79   11.10
   5   5   7   88.49   18.90
   7  -6  -7  243.48   26.50
   7   6  -7  262.57   24.40
   7   6  -7  236.28   28.30
   7   6  -7  241.28   29.90
   6  -6  -7    4.10    3.60
   6  -6  -7    2.60    5.20
  -6  -6   7    1.70    6.20
   6   6  -7   -4.40    6.80
   6   6  -7    1.50    5.30
   6   6  -7    9.50    6.40
  -5  -6   7   72.79   13.50
  -5  -6   7   57.49   10.60
   5  -6  -7   86.79   14.30
   5  -6  -7   52.49    7.80
   5   6  -7   36.30    9.20
   5   6  -7   64.59   13.00
   5   6  -7   52.89   12.10
  -4  -6   7  135.79   18.30
   4  -6  -7  192.18   20.20
   4  -6  -7  163.68   14.70
  -4  -6   7  184.68   19.40
   4   6  -7  148.19   17.40
   4   6  -7  169.58   21.30
  -4   6   7  147.09   14.10
   4   6  -7  165.58   19.20
  -3  -6   7    4.00    4.80
   3  -6  -7   11.60    4.60
  -3  -6   7    6.30    6.50
   3  -6  -7   15.60    6.40
  -3   6   7   13.30    6.40
   3   6  -7    8.30    5.00
   3   6  -7    3.90    4.20
  -3   6   7    5.90    4.80
   3   6  -7   19.90    8.00
  -2  -6   7  531.05   39.90
   2  -6  -7  594.44   37.70
  -2  -6   7  673.63   41.30
   2  -6  -7  598.54   37.90
   2   6  -7  549.54   35.50
  -2   6   7  637.04   37.90
   2   6  -7  564.84   37.30
  -2   6   7  484.15   39.60
   2   6  -7  468.35   40.50
   1  -6  -7  258.77   20.00
  -1  -6   7  234.78   22.30
   1  -6  -7  223.68   20.50
  -1  -6   7  251.17   22.80
  -1   6   7  260.57   21.00
   1   6  -7  285.47   20.60
  -1   6   7  290.47   26.00
   1   6  -7  225.58   24.90
   0  -6   7  310.17   24.70
   0  -6  -7  279.27   23.10
   0  -6   7  288.47   24.60
   0  -6  -7  306.57   21.00
   0   6  -7  256.17   19.50
   0   6  -7  257.67   24.80
   0   6   7  290.37   26.80
   0   6   7  288.57   22.80
   1  -6   7  123.19   15.90
   1  -6   7   87.39   13.50
  -1  -6  -7  109.99   14.10
  -1  -6  -7  105.49   10.20
   1   6   7   98.29   16.00
   1   6   7   96.99   13.50
   1   6   7  105.39   12.80
  -1   6  -7  138.39   17.30
   2  -6   7   81.59   13.20
   2  -6   7   66.99   11.20
  -2  -6  -7   77.29   11.70
   2   6   7   74.99   14.80
   2   6   7   68.59   11.80
   2   6   7   63.79   10.80
   3  -6   7   61.99   10.60
   3  -6   7   69.99   12.80
   3   6   7   56.39   10.00
   3   6   7   54.89   13.60
   3   6   7   74.89   12.80
   4  -6   7   55.69   11.70
   4   6   7   27.00   13.30
   4   6   7   49.60    9.00
   4   6   7   36.40    9.80
   6  -7  -7  148.39   20.10
  -6  -7   7  146.29   21.90
   6  -7  -7  166.58   14.30
   6   7  -7  143.59   22.50
   6   7  -7  171.28   23.00
   6   7  -7  158.08   20.20
  -5  -7   7  235.28   25.00
  -5  -7   7  262.47   25.00
   5  -7  -7  259.67   24.90
   5  -7  -7  246.68   20.40
   5   7  -7  272.97   24.60
   5   7  -7  282.87   26.10
   5   7  -7  311.47   31.50
   4  -7  -7  273.17   21.80
  -4  -7   7  263.27   27.90
  -4  -7   7  288.67   25.20
   4  -7  -7  254.57   24.20
   4   7  -7  292.17   30.80
   4   7  -7  261.27   23.20
   4   7  -7  276.57   23.80
  -4   7   7  281.27   21.40
   3  -7  -7   28.50    8.30
  -3  -7   7   43.80   10.10
   3  -7  -7   35.80    8.10
  -3  -7   7   23.40    8.50
  -3   7   7   57.69   11.60
   3   7  -7   35.70    8.90
  -3   7   7   34.40    7.30
   3   7  -7   42.20   10.90
   2  -7  -7   87.99   12.10
  -2  -7   7   88.69   14.90
  -2  -7   7   71.49   13.20
   2  -7  -7   87.19   12.70
  -2   7   7  113.49   13.70
  -2   7   7   78.99   14.80
   2   7  -7   98.99   13.30
   2   7  -7   91.59   16.00
  -1  -7   7   14.90    6.00
   1  -7  -7   10.30    4.70
   1  -7  -7    7.60    5.40
  -1  -7   7   12.90    6.50
   1   7  -7   11.50    8.00
  -1   7   7    8.90    6.40
   1   7  -7   10.00    4.80
  -1   7   7   12.60    6.30
   0  -7   7  234.98   23.60
   0  -7  -7  277.97   24.30
   0  -7  -7  324.37   22.00
   0  -7   7  305.87   26.30
   0   7   7  315.07   24.50
   0   7  -7  278.47   26.10
   0   7   7  289.67   27.10
   0   7  -7  281.37   21.20
  -1  -7  -7  513.45   31.90
   1  -7   7  560.64   38.40
   1  -7   7  501.15   36.80
  -1  -7  -7  469.25   35.50
   1   7   7  479.15   35.10
   1   7   7  504.95   40.00
   1   7   7  472.95   34.90
   2  -7   7  112.29   15.00
  -2  -7  -7  129.09   16.30
   2  -7   7  109.19   16.50
   2   7   7  105.29   14.10
   2   7   7  110.79   15.70
   2   7   7   97.39   16.80
   3  -7   7  116.89   16.60
   3   7   7   97.29   15.40
   3   7   7  104.59   14.30
   3   7   7  162.98   22.90
   5  -8  -7   22.50    9.10
   5  -8  -7   29.20    7.20
  -5  -8   7   42.40   12.70
  -5  -8   7   54.39   11.80
   5   8  -7   35.40   10.30
   5   8  -7   22.30    9.20
  -4  -8   7  208.48   24.20
   4  -8  -7  157.68   19.40
   4  -8  -7  137.59   16.40
  -4  -8   7  155.78   20.00
   4   8  -7  188.68   21.20
   4   8  -7  171.88   24.00
  -3  -8   7  120.29   18.50
  -3  -8   7  154.68   21.00
   3  -8  -7  144.49   18.10
   3  -8  -7  151.28   17.00
  -3   8   7  172.58   22.00
   3   8  -7  140.79   21.80
  -3   8   7  190.88   18.60
   3   8  -7  153.78   18.50
   2  -8  -7   17.60    7.50
  -2  -8   7    5.30    7.20
   2  -8  -7   15.70    6.30
  -2  -8   7   12.00    7.70
   2   8  -7   14.30    6.40
   2   8  -7    3.80    7.60
  -2   8   7   28.10    9.90
  -2   8   7   25.40    7.70
  -1  -8   7   86.79   15.20
   1  -8  -7  118.49   15.90
   1  -8  -7   84.59   11.80
  -1  -8   7  106.89   16.20
   1   8  -7   93.99   17.30
  -1   8   7   88.59   16.20
   1   8  -7   97.89   13.40
  -1   8   7   95.19   13.90
   0  -8  -7  123.79   15.40
   0  -8   7  115.59   16.60
   0  -8  -7   77.99   10.70
   0  -8   7  113.69   16.70
   0   8   7  107.99   17.40
   0   8   7   75.99   13.40
   0   8  -7   95.29   16.80
  -1  -8  -7   23.50    8.50
   1  -8   7   22.20    9.30
   1  -8   7   29.60    9.70
   1   8   7   28.80   10.40
   1   8   7   18.00    8.10
   2  -8   7   28.80   10.00
  -2  -8  -7   37.40    8.70
   2   8   7   17.10    8.80
   2   8   7    8.80    7.40
   2   8   7   39.70   12.90
  -3  -9   7   15.80    9.30
   3  -9  -7   18.10    7.30
   3  -9  -7   16.80    7.60
  -3  -9   7   10.50    7.10
   3   9  -7    7.90   11.00
   3   9  -7   15.40    8.10
  -3   9   7    7.00    7.80
  -3   9   7   11.90    7.30
   2  -9  -7   45.40    9.80
  -2  -9   7   38.00   12.40
   2  -9  -7   42.60    9.80
  -2  -9   7   26.60    9.40
   2   9  -7   60.69   11.90
   2   9  -7   80.49   17.30
  -2   9   7   44.90   10.40
  -2   9   7   52.19   13.10
   1  -9  -7   25.30    8.40
  -1  -9   7   34.60   10.50
   1  -9  -7   25.80    7.30
  -1  -9   7   31.80   10.80
   1   9  -7   38.80    9.40
   1   9  -7   56.09   14.20
  -1   9   7   59.79   14.30
  -1   9   7   44.10   10.50
   0  -9  -7  246.28   25.30
   0  -9   7  233.48   27.00
   0   9   7  229.68   27.70
   0   9   7  222.38   23.70
  -1  -9  -7  219.58   23.90
   1   9   7  213.28   26.60
   1   9   7  180.18   24.70
   8   0  -8   42.70    9.30
   8   0  -8   44.40    8.90
   8   0  -8   44.80    9.00
   7   0  -8  303.37   23.60
   7   0  -8  329.67   24.10
  -6   0   8  392.86   26.90
   6   0  -8  422.16   28.10
   6   0  -8  385.76   27.60
   6   0  -8  372.16   26.50
  -5   0   8  413.86   27.90
   5   0  -8  449.95   28.80
   5   0  -8  409.96   28.40
   5   0  -8  423.46   23.50
   5   0  -8  418.46   27.40
   4   0  -8  628.34   41.70
  -4   0   8  723.03   39.80
   4   0  -8  633.84   42.50
   4   0  -8  761.82   41.20
   4   0  -8  667.93   38.20
  -4   0   8  759.72   42.30
  -3   0   8    0.00    2.70
   3   0  -8   -0.10    1.70
   3   0  -8   -0.80    2.70
  -3   0   8   -2.90    1.60
   3   0  -8    3.30    2.70
  -2   0   8 1212.58   68.09
  -2   0   8 1185.18   68.59
   2   0  -8 1260.27   70.59
   2   0  -8 1222.48   69.19
  -1   0   8    7.50    3.10
  -1   0   8    8.00    3.10
   1   0  -8   10.40    2.40
   1   0  -8   11.20    3.60
   1   0  -8    9.70    4.40
  -1   0   8    9.70    5.00
   0   0  -8   11.50    1.30
   0   0   8   12.30    3.20
   0   0   8   10.00    5.30
   0   0   8   13.00    3.90
   0   0  -8   13.50    1.20
   0   0   8   11.30    3.80
   0   0  -8    8.10    3.40
   1   0   8 1364.76   80.19
   1   0   8 1366.06   76.09
   1   0   8 1241.88   74.89
   1   0   8 1371.16   76.69
  -1   0  -8 1411.66   75.69
   2   0   8  460.45   28.10
   2   0   8  437.46   29.80
  -2   0  -8  492.95   28.50
   2   0   8  466.05   29.70
   2   0   8  434.06   33.20
   3   0   8  520.35   39.30
   3   0   8  558.94   32.80
   3   0   8  570.24   35.10
   4   0   8  506.25   29.50
   4   0   8  478.25   31.70
   4   0   8  441.66   35.80
   5   0   8   71.29   10.60
   5   0   8   83.59   15.60
   5   0   8   55.79    6.80
   8  -1  -8  108.89   14.70
   8  -1  -8  162.28   16.20
   8  -1  -8  154.18   16.10
   8   1  -8  120.49   15.90
   8   1  -8  138.79   16.40
   8   1  -8  118.29   13.70
   7  -1  -8  209.98   17.50
   7  -1  -8  211.68   18.80
   7  -1  -8  201.98   17.30
   7   1  -8  205.58   17.00
   7   1  -8  193.98   17.70
   7   1  -8  211.88   19.50
   6  -1  -8  442.86   30.80
  -6  -1   8  475.35   32.40
   6  -1  -8  547.45   33.70
   6  -1  -8  477.85   31.10
   6   1  -8  471.85   31.60
  -6   1   8  509.55   30.80
   6   1  -8  439.06   31.20
   6   1  -8  454.35   32.80
  -5  -1   8   24.40    6.00
   5  -1  -8   19.50    5.00
  -5  -1   8   22.10    4.30
   5  -1  -8   14.40    5.70
   5   1  -8   16.40    4.80
  -5   1   8   14.70    4.30
   5   1  -8   20.60    3.40
   5   1  -8   17.80    5.40
   5   1  -8   19.90    5.30
   4  -1  -8  815.42   47.70
  -4  -1   8  794.82   46.70
  -4  -1   8  800.32   45.00
   4  -1  -8  733.53   45.20
  -4   1   8  766.72   45.10
  -4   1   8  779.32   42.00
   4   1  -8  757.52   46.70
   4   1  -8  734.33   47.00
   4   1  -8  737.53   44.90
   4   1  -8  768.02   43.30
   3  -1  -8 2516.05  135.69
  -3  -1   8 2385.06  134.59
   3  -1  -8 2315.27  133.39
  -3  -1   8 2700.33  133.99
  -3   1   8 2433.06  133.29
   3   1  -8 2505.45  132.69
   3   1  -8 2367.46  131.49
   3   1  -8 2433.76  135.09
   3   1  -8 2325.67  134.99
  -3   1   8 2393.26  131.59
   2  -1  -8  305.37   19.80
  -2  -1   8  275.37   19.90
   2  -1  -8  294.07   20.90
  -2  -1   8  275.17   20.20
   2   1  -8  304.37   18.30
  -2   1   8  269.67   23.50
   2   1  -8  298.27   18.20
   2   1  -8  288.77   21.30
   2   1  -8  329.97   21.40
  -2   1   8  311.47   19.80
  -2   1   8  311.17   18.60
   1  -1  -8  271.67   17.10
  -1  -1   8  258.87   18.20
  -1  -1   8  224.08   19.20
   1  -1  -8  252.17   18.70
   1  -1  -8  236.58   17.10
  -1  -1   8  251.27   17.90
  -1   1   8  253.27   17.30
  -1   1   8  284.37   16.90
   1   1  -8  258.97   15.10
   1   1  -8  255.07   18.40
  -1   1   8  257.47   21.10
   0  -1   8  238.18   17.60
   0  -1  -8  263.47   17.40
   0  -1  -8  248.68   15.90
   0  -1   8  244.88   17.10
   0  -1  -8  233.68   18.90
   0  -1   8  239.78   19.60
   0  -1   8  237.88   18.00
   0   1  -8  278.87   20.70
   0   1   8  246.88   17.10
   0   1  -8  303.17   18.70
   0   1   8  265.37   21.60
   0   1   8  257.67   17.10
   0   1   8  281.77   19.70
   1  -1   8  435.26   32.10
  -1  -1  -8  520.15   29.50
  -1  -1  -8  483.15   27.00
   1  -1   8  499.35   30.90
   1  -1   8  484.05   29.80
   1  -1   8  500.25   29.80
   1   1   8  449.86   29.00
   1   1   8  466.25   34.50
  -1   1  -8  477.75   30.00
   1   1   8  450.45   29.20
   1   1   8  522.95   32.20
  -2  -1  -8  649.34   39.10
   2  -1   8  656.23   43.30
  -2  -1  -8  644.34   37.10
   2  -1   8  654.93   40.10
   2  -1   8  688.03   41.30
   2  -1   8  653.33   39.60
   2   1   8  690.33   39.40
   2   1   8  651.13   42.10
   2   1   8  676.03   40.30
   2   1   8  736.43   46.60
  -2   1  -8  696.03   40.30
   3  -1   8  242.48   16.90
   3  -1   8  243.18   21.60
   3  -1   8  251.17   19.20
   3   1   8  230.58   17.80
   3   1   8  214.58   22.60
   3   1   8  239.38   16.20
   4  -1   8  226.78   15.40
   4  -1   8  219.98   21.10
   4  -1   8  211.68   17.70
   4   1   8  164.58   22.20
   4   1   8  200.98   16.50
   4   1   8  203.28   14.40
   5  -1   8   56.79    6.90
   5  -1   8   72.69   10.90
   5  -1   8   57.69   12.60
   5   1   8   64.29   14.40
   5   1   8   44.40    8.20
   5   1   8   47.60    5.70
   8  -2  -8   24.70    8.00
   8  -2  -8   11.90    5.80
   8  -2  -8   13.80    4.80
   8   2  -8   17.70    7.30
   8   2  -8    5.20    6.20
   7  -2  -8  394.26   26.00
   7  -2  -8  370.36   26.40
   7  -2  -8  396.56   29.20
   7   2  -8  378.06   28.00
   7   2  -8  379.46   29.40
   7   2  -8  342.37   25.50
  -6  -2   8  649.54   42.40
   6  -2  -8  673.03   42.90
   6  -2  -8  651.63   39.10
   6   2  -8  605.64   40.80
   6   2  -8  660.13   40.40
   6   2  -8  655.03   43.50
  -6   2   8  589.44   38.20
  -5  -2   8  171.08   17.40
  -5  -2   8  169.48   13.90
   5  -2  -8  157.38   15.80
   5  -2  -8  164.68   13.40
   5   2  -8  159.58   17.40
  -5   2   8  174.78   13.20
   5   2  -8  157.48   14.10
   5   2  -8  197.48   13.10
   5   2  -8  153.78   14.30
   4  -2  -8  164.58   14.60
  -4  -2   8  147.39   13.20
  -4  -2   8  172.38   15.40
   4  -2  -8  148.69   12.20
   4   2  -8  151.58   14.60
  -4   2   8  158.48   12.60
   4   2  -8  161.18   12.00
   4   2  -8  154.08   13.50
   4   2  -8  169.68   13.30
  -3  -2   8  473.35   28.90
   3  -2  -8  424.96   28.40
   3  -2  -8  391.66   25.90
  -3  -2   8  381.96   26.80
  -3   2   8  416.16   23.70
   3   2  -8  399.16   27.70
   3   2  -8  452.35   29.30
   3   2  -8  412.76   25.80
   3   2  -8  414.26   26.30
  -3   2   8  385.16   25.70
  -2  -2   8  462.85   31.20
  -2  -2   8  463.85   30.80
   2  -2  -8  470.85   31.40
   2  -2  -8  495.55   30.60
   2  -2  -8  471.25   29.60
  -2   2   8  523.25   35.40
   2   2  -8  476.45   32.10
  -2   2   8  458.05   27.70
  -2   2   8  470.95   29.70
   2   2  -8  536.45   29.00
  -1  -2   8  796.32   46.30
   1  -2  -8  811.22   45.40
  -1  -2   8  773.92   46.20
   1  -2  -8  809.02   46.80
   1  -2  -8  730.63   44.70
  -1   2   8  750.72   44.70
  -1   2   8  679.63   43.00
   1   2  -8  706.33   46.20
  -1   2   8  953.00   51.79
   1   2  -8  731.63   46.70
   1   2  -8  760.32   42.50
   0  -2   8  627.84   38.80
   0  -2   8  664.53   37.50
   0  -2  -8  621.84   39.20
   0  -2   8  623.34   39.20
   0  -2  -8  640.84   37.80
   0  -2   8  619.14   39.10
   0   2   8  607.94   37.60
   0   2  -8  580.64   39.00
   0   2   8  649.34   43.40
   0   2  -8  676.03   39.90
   1  -2   8   76.39    7.90
   1  -2   8   77.59    9.60
  -1  -2  -8   65.89    6.90
  -1  -2  -8   57.19    7.30
   1  -2   8   54.29    7.90
   1  -2   8   88.59   10.30
   1   2   8   69.99    7.90
  -1   2  -8   57.69    9.10
   1   2   8   55.39   11.60
   1   2   8   60.99   10.10
  -1   2  -8   65.49    9.10
   2  -2   8  683.23   42.20
  -2  -2  -8  669.23   41.10
   2  -2   8  694.13   43.90
   2  -2   8  678.43   43.50
   2   2   8  693.63   41.30
  -2   2  -8  674.63   46.50
   2   2   8  705.83   45.10
  -2   2  -8  768.72   43.40
   2   2   8  716.53   48.40
   2   2   8  721.33   41.20
   3  -2   8    9.80    4.80
   3  -2   8   14.40    5.90
   3  -2   8   14.40    4.40
   3   2   8   10.50    7.80
   3   2   8   12.00    3.60
   3   2   8   17.70    4.50
   4  -2   8  211.58   16.30
   4  -2   8  218.68   20.20
   4  -2   8  238.38   18.90
   4   2   8  205.78   15.20
   4   2   8  205.38   24.90
   5  -2   8   83.29   12.20
   5   2   8  112.79    9.20
   5   2   8  118.09   20.10
   8  -3  -8  260.87   24.50
   8  -3  -8  297.27   22.30
   8   3  -8  290.77   25.00
   8   3  -8  232.48   26.10
   7  -3  -8  384.66   25.10
   7  -3  -8  360.36   28.70
   7   3  -8  338.57   30.00
   7   3  -8  353.76   28.30
   7   3  -8  391.76   25.90
   6  -3  -8   51.79    7.00
  -6  -3   8   51.59   10.30
   6  -3  -8   34.60    8.70
   6   3  -8   44.70    8.90
   6   3  -8   50.09   11.10
   6   3  -8   37.40    7.00
  -5  -3   8  177.88   15.70
   5  -3  -8  172.48   14.20
   5  -3  -8  196.88   17.90
  -5  -3   8  186.38   17.60
   5   3  -8  224.88   19.60
   5   3  -8  179.88   16.30
  -5   3   8  194.78   14.50
   5   3  -8  207.58   16.10
   4  -3  -8    3.50    3.40
  -4  -3   8   14.30    6.40
  -4  -3   8   18.00    5.60
   4  -3  -8   10.40    3.80
   4   3  -8   21.60    5.60
   4   3  -8   20.10    6.80
   4   3  -8   17.90    5.10
  -4   3   8   13.30    4.10
   3  -3  -8   14.30    4.30
   3  -3  -8   20.80    5.70
  -3  -3   8   24.30    6.80
  -3  -3   8   22.00    5.60
   3   3  -8   23.60    7.50
   3   3  -8   17.90    4.60
  -3   3   8   21.60    3.20
  -3   3   8   18.90    7.20
  -3   3   8   19.80    2.50
  -3   3   8   11.70    4.10
   2  -3  -8 1057.39   57.89
  -2  -3   8  853.51   57.39
   2  -3  -8  941.31   55.39
  -2  -3   8  892.01   57.19
  -2   3   8  999.40   55.69
   2   3  -8  857.51   58.09
   2   3  -8  979.40   57.09
   2   3  -8  959.60   54.89
  -2   3   8 1071.39   62.29
  -1  -3   8  736.13   48.40
   1  -3  -8  794.02   46.90
   1  -3  -8  809.52   48.10
  -1  -3   8  844.22   49.50
   1   3  -8  754.42   47.20
  -1   3   8  773.42   46.80
  -1   3   8  927.51   53.89
   1   3  -8  816.32   49.99
   1   3  -8  757.42   44.70
   0  -3  -8  323.47   23.80
   0  -3   8  347.37   25.10
   0  -3   8  365.96   23.00
   0  -3   8  380.36   25.60
   0  -3  -8  380.66   24.00
   0  -3  -8  373.66   23.90
   0   3   8  367.46   23.70
   0   3  -8  333.27   23.60
   0   3  -8  316.67   25.20
   0   3   8  348.57   28.20
  -1  -3  -8  360.16   23.30
  -1  -3  -8  349.27   22.80
  -1  -3  -8  346.37   24.00
   1  -3   8  340.17   22.10
   1  -3   8  349.57   22.90
   1  -3   8  337.97   24.50
   1  -3   8  327.17   25.20
  -1   3  -8  352.76   25.00
   1   3   8  334.47   28.40
   1   3   8  327.77   22.80
  -1   3  -8  363.46   23.90
   2  -3   8   40.00    7.20
   2  -3   8   23.00    6.90
  -2  -3  -8   24.90    4.90
   2  -3   8   33.60    6.20
   2   3   8   47.20   10.70
  -2   3  -8   29.70    6.70
   2   3   8   37.20    6.20
   2   3   8   36.00    6.30
   3  -3   8   30.10    6.50
   3  -3   8   32.60    7.30
   3  -3   8   34.30    7.00
   3   3   8   12.20    9.40
   3   3   8   33.40    6.80
   3   3   8   28.50    5.40
   4  -3   8   86.69    9.90
   4  -3   8   86.29   12.70
   4   3   8   74.19    8.60
   4   3   8   89.19   15.80
   5  -3   8  143.69   16.60
   5   3   8  114.39   20.20
   5   3   8  127.19   10.90
   8  -4  -8   39.50    6.70
   8  -4  -8   34.20    9.70
   8   4  -8   14.30    7.30
   8   4  -8   25.30    9.60
   7  -4  -8  162.28   19.00
   7  -4  -8  142.79   12.80
   7   4  -8  149.39   19.90
   7   4  -8  161.28   18.60
  -6  -4   8  767.22   45.60
   6  -4  -8  581.14   42.10
   6  -4  -8  631.54   38.00
   6   4  -8  565.64   43.70
   6   4  -8  591.14   41.30
   5  -4  -8  253.57   18.50
   5  -4  -8  289.67   22.80
  -5  -4   8  318.67   25.00
  -5  -4   8  309.67   22.00
   5   4  -8  199.78   20.10
   5   4  -8  247.78   24.10
  -5   4   8  279.57   18.80
  -4  -4   8   82.49   11.50
   4  -4  -8   89.99   12.00
  -4  -4   8   93.39   13.30
   4  -4  -8   81.19    9.70
   4   4  -8   88.99   14.00
   4   4  -8   93.19   11.50
  -4   4   8   77.89    9.40
   3  -4  -8  241.18   19.00
  -3  -4   8  198.28   18.40
   3  -4  -8  196.78   16.20
  -3  -4   8  219.28   19.70
  -3   4   8  230.58   16.70
   3   4  -8  221.48   22.40
  -3   4   8  239.88   22.50
   3   4  -8  198.08   16.70
  -3   4   8  209.38   14.00
  -2  -4   8   14.30    6.30
   2  -4  -8   12.30    4.40
  -2  -4   8   16.10    5.70
  -2  -4   8   19.00    3.50
   2  -4  -8   11.70    4.90
  -2   4   8   17.90    4.40
   2   4  -8   17.30    4.80
  -2   4   8   21.00    5.30
  -2   4   8   20.90    8.50
   2   4  -8   18.30    4.80
   2   4  -8   10.50    5.30
  -1  -4   8  158.98   16.80
   1  -4  -8  150.18   14.10
  -1  -4   8  172.78   16.10
   1  -4  -8  154.18   13.70
  -1  -4   8  151.98   10.50
  -1   4   8  152.48   18.70
  -1   4   8  159.48   13.70
   1   4  -8  163.88   17.60
   1   4  -8  156.38   12.60
   1   4  -8  166.88   12.20
   0  -4   8  697.33   38.90
   0  -4  -8  674.33   43.40
   0  -4   8  703.63   45.20
   0  -4  -8  684.83   43.30
   0  -4   8  775.22   46.30
   0   4   8  667.33   48.10
   0   4  -8  755.92   46.80
   0   4   8  743.93   43.60
  -1  -4  -8  154.48   13.80
   1  -4   8  164.18   15.10
   1  -4   8  143.29   16.30
  -1  -4  -8  156.08   13.50
   1  -4   8  155.28   15.90
   1   4   8  149.69   20.30
  -1   4  -8  150.08   16.80
   1   4   8  158.68   13.80
   2  -4   8   52.89    9.30
   2  -4   8   76.99   11.40
  -2  -4  -8   64.99    8.80
   2   4   8   47.50    8.30
   2   4   8   50.39    8.10
   2   4   8   77.49   14.60
   3  -4   8   85.39   12.90
   3  -4   8   95.19   11.50
   3   4   8   86.29   10.20
   3   4   8   73.19   14.50
   3   4   8   85.09   11.00
   4  -4   8   74.89    9.80
   4  -4   8   89.89   13.70
   4   4   8  123.89   20.00
   4   4   8   92.39   10.20
   5  -4   8   77.29   12.60
   5   4   8   92.79   19.10
   5   4   8   90.39    9.60
   7  -5  -8   66.19   13.00
   7  -5  -8   63.49    8.40
   7   5  -8   61.19   12.10
   7   5  -8   98.99   19.20
   7   5  -8   78.89   14.80
   6  -5  -8  107.09   15.70
  -6  -5   8  161.88   19.70
  -6  -5   8  147.99   16.10
   6  -5  -8  141.69   12.40
   6   5  -8  158.18   20.80
   6   5  -8  151.88   17.60
  -5  -5   8    3.90    6.00
   5  -5  -8    2.40    5.40
  -5  -5   8   11.50    5.90
   5  -5  -8    7.30    3.90
   5   5  -8    7.50    6.70
   5   5  -8    4.80    4.50
  -5   5   8    6.30    3.90
  -4  -5   8  795.72   48.40
  -4  -5   8  773.32   49.99
   4  -5  -8  664.83   47.00
   4  -5  -8  687.63   44.20
   4   5  -8  694.83   50.49
   4   5  -8  736.73   46.80
  -4   5   8  787.82   44.80
   3  -5  -8  269.57   21.30
  -3  -5   8  277.37   23.40
  -3  -5   8  270.27   22.30
   3  -5  -8  206.98   18.20
   3   5  -8  236.38   25.10
  -3   5   8  250.37   18.90
   3   5  -8  271.77   20.50
  -3   5   8  267.07   24.20
  -2  -5   8   29.90    7.40
   2  -5  -8   20.90    6.50
  -2  -5   8   48.00    9.30
   2  -5  -8   28.60    6.50
  -2   5   8   35.30   10.50
  -2   5   8   35.20    7.70
   2   5  -8   32.80    6.40
  -2   5   8   29.30    6.60
   2   5  -8   26.00    7.70
   1  -5  -8  114.39   13.60
   1  -5  -8  147.99   13.70
  -1  -5   8  135.39   16.60
  -1  -5   8  143.59   16.30
  -1   5   8  127.79   13.80
   1   5  -8  154.48   12.10
   1   5  -8  122.09   16.50
  -1   5   8  129.99   17.90
   0  -5   8  334.47   28.40
   0  -5  -8  382.46   26.00
   0  -5   8  353.26   28.50
   0  -5  -8  414.26   27.70
   0   5   8  420.86   27.40
   0   5  -8  401.16   30.60
   0   5   8  364.56   31.00
  -1  -5  -8   20.80    6.40
   1  -5   8   17.50    6.70
   1  -5   8   21.30    6.80
  -1  -5  -8   22.10    5.50
   1   5   8    5.10    4.60
   1   5   8   27.40   10.00
  -1   5  -8   30.70    7.60
   1   5   8   17.40    5.80
   2  -5   8  199.98   21.40
  -2  -5  -8  231.68   18.80
   2  -5   8  220.78   19.90
   2   5   8  216.28   18.20
   2   5   8  230.38   19.60
   2   5   8  224.88   23.70
   3  -5   8  245.68   24.30
   3  -5   8  222.98   19.70
   3   5   8  231.08   28.20
   3   5   8  231.78   18.40
   4  -5   8  457.65   33.00
   4  -5   8  367.26   27.80
   4   5   8  386.06   36.30
   4   5   8  412.36   27.80
   7  -6  -8   48.50    7.70
   7   6  -8   51.49   11.30
   7   6  -8   54.39   15.60
   6  -6  -8   52.29    7.80
   6  -6  -8   34.40    9.80
  -6  -6   8   50.69   12.50
  -6  -6   8   44.20    9.50
   6   6  -8   59.69   14.40
   6   6  -8   61.79   11.10
   6   6  -8   33.50   11.70
  -5  -6   8  159.88   18.30
   5  -6  -8  184.68   14.50
   5  -6  -8  106.19   15.70
  -5  -6   8  145.39   20.00
   5   6  -8  161.78   20.70
   5   6  -8  134.39   20.20
   5   6  -8  133.29   16.70
  -4  -6   8  312.27   27.80
   4  -6  -8  270.67   21.70
   4  -6  -8  311.27   25.50
  -4  -6   8  354.86   27.20
   4   6  -8  306.97   25.90
   4   6  -8  265.67   30.20
   4   6  -8  301.97   24.90
  -4   6   8  312.37   22.50
  -3  -6   8  495.25   39.60
   3  -6  -8  492.95   35.10
   3  -6  -8  510.45   37.20
  -3  -6   8  540.35   39.10
   3   6  -8  619.34   37.80
  -3   6   8  569.14   36.00
  -3   6   8  647.04   43.40
   3   6  -8  538.15   41.70
   3   6  -8  516.85   36.70
  -2  -6   8  206.48   21.90
   2  -6  -8  191.68   17.10
  -2  -6   8  167.78   19.20
   2  -6  -8  203.78   17.20
  -2   6   8  147.49   19.90
   2   6  -8  223.78   24.20
   2   6  -8  164.88   15.40
  -2   6   8  165.18   17.00
  -1  -6   8  230.48   22.60
   1  -6  -8  279.97   21.30
  -1  -6   8  228.88   22.20
   1  -6  -8  232.58   19.60
  -1   6   8  260.77   20.60
  -1   6   8  260.77   24.70
   1   6  -8  234.88   25.70
   0  -6   8    6.90    4.80
   0  -6   8   13.40    7.00
   0  -6  -8    6.70    4.30
   0  -6  -8   14.30    4.70
   0   6   8   10.80    4.70
   0   6   8    8.40    8.30
   0   6  -8   16.70    8.50
   1  -6   8  323.07   28.30
  -1  -6  -8  371.16   24.70
   1  -6   8  366.66   28.90
  -1  -6  -8  342.47   26.50
   1   6   8  364.36   32.10
   1   6   8  349.07   27.60
   1   6   8  419.56   28.00
  -2  -6  -8    5.40    5.20
   2  -6   8    9.70    5.60
   2  -6   8    0.10    3.30
   2   6   8    7.10    9.40
   2   6   8    4.80    5.50
   2   6   8   -0.50    4.60
   3  -6   8  197.08   22.20
   3  -6   8  158.18   18.00
   3   6   8  258.67   29.50
   3   6   8  189.38   17.80
   4   6   8   64.69   11.70
  -6  -7   8    5.40    5.00
  -6  -7   8   31.40    9.90
   6  -7  -8   20.40    5.60
   6   7  -8    0.80    7.30
   6   7  -8   19.70    8.20
  -5  -7   8   31.80   10.20
   5  -7  -8   23.50    8.90
   5  -7  -8   30.50    7.00
  -5  -7   8   15.00    7.90
   5   7  -8   33.10    8.40
   5   7  -8   29.90   10.70
  -4  -7   8   19.80    9.30
  -4  -7   8   24.80    9.70
   4  -7  -8   46.60    8.40
   4  -7  -8   30.70    9.10
   4   7  -8   55.39   10.50
  -4   7   8   45.90    7.70
   4   7  -8   11.70    9.80
   3  -7  -8  187.18   17.60
  -3  -7   8  159.38   21.00
   3  -7  -8  163.28   17.00
  -3  -7   8  146.09   19.30
   3   7  -8  167.38   18.40
  -3   7   8  149.49   21.00
  -3   7   8  162.88   15.10
   3   7  -8  129.09   20.70
   2  -7  -8  106.89   13.30
   2  -7  -8   83.79   12.10
  -2  -7   8   78.99   14.10
  -2  -7   8   98.39   15.00
   2   7  -8   77.19   11.50
  -2   7   8   87.69   12.20
  -2   7   8   96.09   16.30
   2   7  -8   87.69   16.00
   1  -7  -8  321.87   25.00
   1  -7  -8  314.97   26.20
  -1  -7   8  359.26   30.10
  -1  -7   8  316.57   27.70
  -1   7   8  423.56   33.30
  -1   7   8  347.27   26.70
   1   7  -8  320.07   29.70
   0  -7  -8  364.16   26.80
   0  -7  -8  357.56   24.80
   0  -7   8  277.77   27.70
   0  -7   8  333.87   28.50
   0   7   8  312.87   26.10
   0   7   8  335.97   31.00
   0   7  -8  369.26   31.70
   1  -7   8  104.39   16.20
   1  -7   8  142.39   17.50
  -1  -7  -8   83.09   13.10
   1   7   8   99.99   18.30
   1   7   8  112.89   14.40
   2  -7   8   35.70    9.10
   2  -7   8   43.60   10.30
  -2  -7  -8   46.30    9.20
   2   7   8   37.20    9.70
   2   7   8   34.80    8.60
   2   7   8   71.39   16.40
   3  -7   8   39.00   13.10
   3  -7   8   38.60    9.20
   3   7   8   46.70   10.90
  -5  -8   8   19.80    9.30
  -5  -8   8   15.20    7.40
   5   8  -8   12.50    8.30
   4  -8  -8   16.80    7.60
   4  -8  -8   26.50    7.50
  -4  -8   8   17.00    7.60
  -4  -8   8   20.70    7.80
   4   8  -8   19.80    9.60
   4   8  -8   29.30    8.70
  -3  -8   8   10.20    7.90
  -3  -8   8    6.00    6.90
   3  -8  -8    7.30    6.10
   3  -8  -8    8.10    5.70
   3   8  -8   11.10    6.50
  -3   8   8    9.30    7.20
  -3   8   8    6.60    4.30
   3   8  -8   12.50   10.00
  -2  -8   8    3.70    7.30
   2  -8  -8   12.90    6.40
  -2  -8   8   10.80    8.10
   2  -8  -8    9.90    5.70
   2   8  -8    7.50    8.90
  -2   8   8    5.50    6.20
   2   8  -8   22.00    7.40
  -2   8   8    1.50    5.80
  -1  -8   8  490.15   37.70
  -1  -8   8  416.56   36.00
   1  -8  -8  458.15   34.30
  -1   8   8  437.46   37.40
   1   8  -8  412.16   37.20
  -1   8   8  514.05   34.60
   0  -8  -8    9.40    5.60
   0  -8   8    5.20    7.40
   0  -8   8    6.40    7.20
   0   8   8   31.90   11.90
   0   8   8   21.50    6.60
   1  -8   8   90.79   16.00
   1  -8   8  124.79   17.40
  -1  -8  -8  106.99   14.80
   1   8   8   85.69   14.00
   1   8   8  114.19   19.00
   2  -8   8  259.87   23.20
   2   8   8  195.18   22.30
   2  -9  -8  103.19   14.30
   2  -9  -8   90.79   13.90
  -2   9   8  103.09   14.70
  -2   9   8   82.59   16.50
   2   9  -8   96.69   20.00
   1  -9  -8   34.30    9.90
  -1   9   8   36.00   10.10
   1   9  -8   51.29   18.60
  -1   9   8   36.50   10.40
   8   0  -9  170.38   19.60
   8   0  -9  211.38   18.70
   8   0  -9  189.68   18.00
   7   0  -9   94.29   11.60
   7   0  -9   83.59   11.50
   7   0  -9   62.79   10.70
   6   0  -9    8.00    4.70
   6   0  -9    1.10    3.40
   6   0  -9   -0.10    3.30
  -6   0   9   -3.70    3.60
  -5   0   9  586.44   34.60
   5   0  -9  557.24   39.10
  -5   0   9  598.54   38.30
   5   0  -9  734.33   40.30
   5   0  -9  613.74   37.60
   4   0  -9  428.46   30.50
  -4   0   9  518.55   31.20
  -4   0   9  481.35   28.70
   4   0  -9  486.05   29.30
   4   0  -9  455.35   31.70
  -3   0   9  435.96   29.60
   3   0  -9  468.05   30.30
   3   0  -9  483.75   28.00
   3   0  -9  445.26   30.80
  -3   0   9  491.55   28.80
  -2   0   9   34.40    5.90
   2   0  -9   19.90    5.20
   2   0  -9   35.90    6.70
   2   0  -9   25.90    3.70
  -2   0   9   31.30    5.30
   1   0  -9    1.40    3.10
  -1   0   9    8.90    4.40
   1   0  -9    1.30    3.80
   1   0  -9    5.20    1.50
   1   0  -9    2.60    1.90
  -1   0   9    4.80    3.10
  -1   0   9    5.00    3.30
   0   0   9   96.99   13.40
   0   0   9  121.19   10.90
   0   0  -9  117.69   10.60
   0   0   9  120.79   10.10
   1   0   9  120.19   11.00
   1   0   9  148.39   12.70
   1   0   9  137.59   12.80
   1   0   9  160.18   16.10
  -1   0  -9  130.19   11.50
   2   0   9  174.08   13.40
  -2   0  -9  186.08   14.20
   2   0   9  187.58   19.20
   2   0   9  200.58   15.50
   3   0   9   63.19    7.40
   3   0   9   56.29    8.60
   3   0   9   60.69   12.10
   4   0   9   10.90    3.60
   4   0   9   10.70    8.60
   4   0   9   11.60    5.50
   5   0   9    2.10    7.70
   5   0   9    9.60    5.80
   5   0   9    9.10    3.60
   8  -1  -9   66.29   11.10
   8  -1  -9   65.59   10.70
   8  -1  -9   61.99   10.50
   8   1  -9   92.89   13.30
   8   1  -9   84.29   11.70
   8   1  -9   73.39   12.90
   7  -1  -9   89.69   12.20
   7  -1  -9  100.49   11.90
   7  -1  -9   92.19   11.50
   7   1  -9   75.49   11.20
   7   1  -9   72.49   12.50
   7   1  -9   83.99   11.70
   6  -1  -9  640.74   38.00
   6  -1  -9  576.94   36.80
  -6  -1   9  529.45   38.50
   6  -1  -9  571.64   38.60
  -6   1   9  555.84   36.50
   6   1  -9  637.44   38.00
   6   1  -9  625.44   40.10
   6   1  -9  554.14   37.60
  -5  -1   9   72.19   10.20
   5  -1  -9   53.89    9.50
  -5  -1   9   58.19    6.90
   5  -1  -9   51.39    8.20
   5   1  -9   59.49    9.70
   5   1  -9   62.39    9.40
  -5   1   9   62.19    8.30
   5   1  -9   52.99    7.90
  -4  -1   9   25.20    6.20
   4  -1  -9   25.60    5.60
   4  -1  -9   27.80    6.90
  -4  -1   9   19.50    4.90
   4   1  -9   26.80    6.90
  -4   1   9   20.50    3.30
   4   1  -9   23.80    6.30
   4   1  -9   26.70    3.70
   4   1  -9   31.10    5.50
  -4   1   9   18.60    4.80
  -3  -1   9   83.89   10.60
   3  -1  -9  100.99   10.50
  -3  -1   9   92.79   10.30
   3  -1  -9   98.69   11.70
  -3   1   9  114.39   10.80
   3   1  -9   95.79    7.60
   3   1  -9  103.29    8.50
   3   1  -9   97.59   11.80
  -3   1   9   87.69    7.80
   3   1  -9   96.89   11.80
   2  -1  -9  367.16   25.20
  -2  -1   9  415.26   26.30
  -2  -1   9  426.26   26.10
   2  -1  -9  347.57   26.30
   2   1  -9  393.36   23.30
  -2   1   9  406.86   25.40
  -2   1   9  378.76   24.00
   2   1  -9  357.56   26.30
  -2   1   9  410.86   30.40
   2   1  -9  409.86   27.70
   1  -1  -9  561.94   31.40
   1  -1  -9  558.64   32.50
  -1  -1   9  526.15   32.70
   1  -1  -9  518.75   34.10
  -1  -1   9  544.65   32.90
  -1  -1   9  498.35   34.80
   1   1  -9  532.45   28.90
  -1   1   9  539.85   31.50
   1   1  -9  499.35   29.00
  -1   1   9  485.65   31.70
   1   1  -9  462.35   32.50
  -1   1   9  502.25   36.40
   0  -1   9  125.09   11.10
   0  -1  -9   90.69    9.30
   0  -1   9  121.59   13.90
   0  -1  -9  127.29   13.50
   0  -1   9  111.89   12.00
   0  -1  -9  108.19    8.10
   0   1   9  125.39   10.40
   0   1  -9  108.09   11.40
   0   1   9  110.39   14.70
   0   1   9  124.39   10.40
  -1  -1  -9  219.78   16.30
   1  -1   9  248.58   18.30
   1  -1   9  237.88   17.30
   1  -1   9  212.58   16.50
   1  -1   9  247.88   20.40
  -1   1  -9  219.38   17.20
   1   1   9  214.68   16.70
   1   1   9  243.38   16.60
   1   1   9  240.48   21.40
   2  -1   9  310.87   24.10
  -2  -1  -9  271.17   18.90
   2  -1   9  256.87   19.10
   2  -1   9  278.97   20.70
  -2   1  -9  267.27   19.90
   2   1   9  303.87   20.20
   2   1   9  260.97   18.80
   2   1   9  308.37   26.00
   3  -1   9  170.48   17.40
   3  -1   9  186.18   15.00
   3  -1   9  184.38   18.20
   3   1   9  195.88   20.20
   3   1   9  205.88   15.90
   3   1   9  180.68   13.80
   4  -1   9   30.70    7.10
   4  -1   9   34.70   10.10
   4  -1   9   28.70    5.80
   4   1   9   22.40    6.20
   4   1   9   22.20    8.70
   4   1   9   29.60    5.10
   5   1   9  146.19   21.80
   5   1   9  150.98   11.90
   8  -2  -9   -1.70    3.80
   8  -2  -9    9.10    6.40
   8  -2  -9    2.80    3.40
   8   2  -9    0.50    4.50
   8   2  -9   -2.40    5.60
   7  -2  -9  107.79   12.30
   7  -2  -9   99.39   13.40
   7  -2  -9   83.09   10.70
   7   2  -9  118.59   15.90
   7   2  -9   90.09   11.70
   7   2  -9   76.19   12.10
   6  -2  -9  201.88   15.90
   6  -2  -9  195.78   18.70
  -6  -2   9  196.18   20.30
   6   2  -9  205.18   17.60
   6   2  -9  195.38   21.00
  -6   2   9  189.88   15.50
   6   2  -9  216.98   17.30
   5  -2  -9   57.99    9.50
   5  -2  -9   50.99    7.80
  -5  -2   9   36.60    9.00
  -5  -2   9   57.39    7.90
   5   2  -9   60.49    9.20
   5   2  -9   68.19   10.70
  -5   2   9   58.19    7.70
   5   2  -9   63.69    8.90
   4  -2  -9 1021.90   62.89
   4  -2  -9  941.01   59.99
  -4  -2   9 1115.59   63.69
  -4  -2   9  975.00   60.59
   4   2  -9 1195.48   62.99
  -4   2   9 1045.10   60.19
   4   2  -9  957.00   63.19
   4   2  -9 1118.69   60.79
  -3  -2   9 1555.34   85.79
   3  -2  -9 1448.26   82.99
   3  -2  -9 1487.25   85.59
  -3  -2   9 1422.06   84.09
   3   2  -9 1471.85   85.99
  -3   2   9 1445.36   82.89
   3   2  -9 1450.75   84.99
   3   2  -9 1526.15   82.39
  -2  -2   9  281.07   20.50
   2  -2  -9  303.87   19.50
  -2  -2   9  273.67   20.20
   2  -2  -9  286.77   20.90
  -2   2   9  268.07   18.90
   2   2  -9  255.97   20.80
  -2   2   9  273.37   17.20
  -2   2   9  231.08   22.60
   2   2  -9  254.97   17.20
   1  -2  -9  293.17   18.90
   1  -2  -9  256.37   19.70
   1  -2  -9  295.67   19.10
  -1  -2   9  272.27   20.10
  -1  -2   9  243.78   19.40
  -1   2   9  257.87   18.50
   1   2  -9  250.57   20.60
  -1   2   9  265.07   17.40
  -1   2   9  251.97   23.60
   1   2  -9  254.87   15.40
   0  -2  -9   35.30    7.30
   0  -2   9   31.50    6.70
   0  -2  -9   23.50    4.60
   0  -2   9   19.70    5.50
   0  -2  -9   28.70    5.50
   0  -2   9   17.80    5.70
   0   2   9   33.70    8.60
   0   2  -9   26.30    6.70
   0   2   9   30.00    5.30
   0   2   9   32.50    5.00
   1  -2   9  118.39   12.00
   1  -2   9  151.08   14.10
   1  -2   9  145.19   12.00
   1  -2   9  141.59   14.50
  -1  -2  -9  133.09   11.80
   1   2   9  145.99   18.70
   1   2   9  150.68   12.10
   1   2   9  147.59   12.20
  -1   2  -9  172.68   14.30
   2  -2   9  343.07   24.20
   2  -2   9  304.77   22.20
  -2  -2  -9  310.27   20.90
   2  -2   9  297.77   23.70
   2   2   9  322.77   21.70
   2   2   9  306.37   21.00
   2   2   9  313.77   27.40
   3  -2   9   21.10    6.90
   3  -2   9   22.20    5.80
   3  -2   9   32.60    7.70
   3   2   9   25.30    5.20
   3   2   9   28.00    6.00
   3   2   9   27.30   10.20
   4  -2   9  236.98   19.50
   4  -2   9  184.08   16.50
   4   2   9  205.98   25.20
   4   2   9  217.38   15.60
   4   2   9  230.58   17.70
   5   2   9  405.86   36.10
   5   2   9  350.56   23.20
   8  -3  -9   70.19    9.90
   8  -3  -9   51.19    9.30
   8  -3  -9   55.09   11.00
   8   3  -9   74.39   13.70
   8   3  -9   60.79   12.20
   7  -3  -9   65.69    9.10
   7  -3  -9   59.19   11.30
   7   3  -9   62.99   12.60
   7   3  -9   69.79   11.70
   7   3  -9   67.59   10.00
   6  -3  -9  156.68   13.60
   6  -3  -9  154.18   17.90
  -6  -3   9  154.28   18.20
   6   3  -9  164.68   16.00
   6   3  -9  157.38   14.30
   6   3  -9  178.28   20.60
   5  -3  -9   57.39    9.80
   5  -3  -9   68.09    8.30
  -5  -3   9   56.29    9.10
  -5  -3   9   85.29   12.40
   5   3  -9   88.69   10.80
   5   3  -9   65.29    9.80
  -5   3   9   68.79    8.40
   5   3  -9   70.29   12.40
   4  -3  -9  402.76   25.60
  -4  -3   9  366.66   28.60
   4  -3  -9  409.46   28.50
  -4  -3   9  355.06   26.70
   4   3  -9  373.76   26.00
  -4   3   9  369.06   24.90
   4   3  -9  405.66   29.80
   4   3  -9  395.26   26.90
   3  -3  -9  637.64   41.20
  -3  -3   9  629.14   41.80
   3  -3  -9  623.14   38.90
  -3  -3   9  733.03   41.90
   3   3  -9  635.44   38.70
   3   3  -9  616.04   42.70
  -3   3   9  612.44   35.70
  -3   3   9  667.53   45.70
  -3   3   9  632.74   38.80
   2  -3  -9  281.77   20.20
   2  -3  -9  289.87   21.80
  -2  -3   9  280.27   21.60
  -2  -3   9  282.27   22.70
  -2   3   9  262.97   25.50
   2   3  -9  311.47   19.20
  -2   3   9  289.37   20.30
   2   3  -9  295.27   23.70
  -2   3   9  272.67   17.50
   1  -3  -9  364.16   25.20
   1  -3  -9  401.26   27.10
  -1  -3   9  357.56   27.30
  -1  -3   9  404.46   27.80
   1   3  -9  389.36   26.50
   1   3  -9  396.16   22.60
   1   3  -9  385.66   28.00
  -1   3   9  375.86   31.00
  -1   3   9  362.46   25.00
   0  -3  -9  100.19   10.60
   0  -3   9   91.59   11.50
   0  -3  -9   85.79   11.00
   0  -3   9   72.69   10.80
   0  -3  -9   89.89   10.00
   0   3   9   68.69   13.80
   0   3  -9   90.59   10.90
   0   3   9   87.59    9.80
   0   3  -9  114.99   13.60
   1  -3   9   76.49    9.60
  -1  -3  -9   82.99   10.60
   1  -3   9   85.69   12.00
  -1  -3  -9   79.49    9.20
   1  -3   9   95.39   11.70
   1   3   9   81.19    9.40
   1   3   9   71.09   14.40
  -1   3  -9  100.69   12.70
   2  -3   9   81.29   10.00
   2  -3   9   75.89   10.20
   2  -3   9   81.29   11.80
  -2  -3  -9   73.09    8.90
   2   3   9   52.49    7.90
   2   3   9   71.09   13.30
   3  -3   9  366.76   26.90
   3  -3   9  409.36   29.50
   3   3   9  344.17   33.00
   3   3   9  409.76   25.80
   4  -3   9   94.59   11.30
   4  -3   9  104.49   13.90
   4   3   9   77.29   15.50
   4   3   9  116.29   10.30
   7  -4  -9  155.18   13.40
   7  -4  -9  161.28   18.60
   7   4  -9  141.49   17.30
   7   4  -9  113.49   18.10
   6  -4  -9  194.88   20.50
   6  -4  -9  171.38   14.10
  -6  -4   9  184.28   20.70
  -6  -4   9  197.98   16.90
   6   4  -9  160.28   20.90
   6   4  -9  145.29   17.60
   5  -4  -9   56.59   10.60
  -5  -4   9   50.59    9.40
  -5  -4   9   39.90   10.50
   5  -4  -9   57.29    7.80
   5   4  -9   61.39   11.90
   5   4  -9   58.29    9.90
  -5   4   9   51.69    7.60
   4  -4  -9  239.08   18.20
   4  -4  -9  222.98   19.90
  -4  -4   9  227.48   21.40
  -4  -4   9  234.98   20.50
  -4   4   9  238.58   18.00
   4   4  -9  263.47   23.90
   4   4  -9  280.87   20.00
  -3  -4   9  691.33   47.00
  -3  -4   9  760.42   46.10
   3  -4  -9  684.43   42.90
   3  -4  -9  716.83   45.40
  -3   4   9  697.13   42.80
  -3   4   9  732.63   39.40
   3   4  -9  669.73   47.30
  -3   4   9  673.23   49.40
   3   4  -9  709.63   43.40
  -2  -4   9  622.74   44.20
   2  -4  -9  615.44   42.10
   2  -4  -9  685.73   41.20
  -2  -4   9  684.33   43.90
   2   4  -9  680.43   43.80
   2   4  -9  672.73   45.50
   2   4  -9  664.63   40.10
  -2   4   9  706.63   41.40
  -2   4   9  669.63   47.10
   1  -4  -9   31.00    6.30
  -1  -4   9   17.50    6.30
  -1  -4   9   19.30    6.50
   1  -4  -9   10.30    5.30
  -1   4   9   24.60    9.40
   1   4  -9   15.20    6.80
  -1   4   9   14.20    5.10
   1   4  -9   21.60    4.00
   0  -4  -9  450.65   29.90
   0  -4   9  466.15   32.40
   0  -4   9  443.56   32.00
   0  -4  -9  411.06   28.90
   0   4   9  431.86   35.40
   0   4   9  467.95   29.50
   0   4  -9  449.86   32.70
  -1  -4  -9  325.07   22.40
  -1  -4  -9  320.57   23.00
   1  -4   9  299.47   24.30
   1  -4   9  325.17   25.50
   1   4   9  301.87   29.20
  -1   4  -9  313.57   24.90
   1   4   9  291.87   22.20
   2  -4   9   71.69   11.30
   2  -4   9   64.49   11.60
  -2  -4  -9   68.19    9.00
   2   4   9   84.69    9.80
   2   4   9   73.99   14.50
   2   4   9   88.09   10.60
   3  -4   9  146.69   15.80
   3  -4   9  187.08   19.40
   3   4   9  132.69   20.70
   3   4   9  153.98   13.60
   4  -4   9   76.39   10.60
   4  -4   9  108.59   15.20
   4   4   9   90.59   19.00
   4   4   9  102.69   10.90
   7  -5  -9  832.62   56.49
   7  -5  -9  817.12   50.59
   7   5  -9  830.82   55.89
   7   5  -9  947.71   61.89
  -6  -5   9  153.48   16.90
   6  -5  -9  184.88   14.40
   6  -5  -9  136.89   18.20
  -6  -5   9  122.49   18.10
   6   5  -9  174.28   22.00
   6   5  -9  155.78   18.10
   5  -5  -9   46.80    7.80
  -5  -5   9   53.79   10.10
   5  -5  -9   44.40    9.90
  -5  -5   9   53.49   12.00
   5   5  -9   56.29   10.20
   5   5  -9   69.39   13.70
  -5   5   9   49.70    7.70
  -4  -5   9    4.90    4.60
   4  -5  -9    8.20    5.80
   4  -5  -9    5.90    4.50
  -4  -5   9   13.10    7.00
  -4   5   9   10.80    3.80
   4   5  -9    3.50    4.70
   4   5  -9   19.20    6.20
  -3  -5   9   70.29   13.20
   3  -5  -9   67.29    9.50
   3  -5  -9   70.09   10.60
  -3  -5   9   81.59   12.80
  -3   5   9   85.29   15.60
   3   5  -9   65.89    9.80
   3   5  -9   62.09   13.60
  -3   5   9   61.09    8.80
  -2  -5   9  185.88   20.80
   2  -5  -9  199.88   17.90
  -2  -5   9  192.88   20.20
   2  -5  -9  196.98   16.80
  -2   5   9  236.78   23.50
   2   5  -9  214.18   23.40
   2   5  -9  193.78   16.00
  -2   5   9  194.88   16.70
   1  -5  -9  617.84   39.90
  -1  -5   9  600.64   42.70
   1  -5  -9  590.54   39.90
  -1  -5   9  576.44   42.50
  -1   5   9  650.63   40.00
  -1   5   9  734.33   47.80
   1   5  -9  600.34   44.20
   0  -5   9  565.84   38.90
   0  -5   9  546.05   38.50
   0  -5  -9  549.65   35.70
   0  -5  -9  555.24   35.80
   0   5   9  523.85   35.50
   0   5   9  576.94   42.60
   0   5  -9  501.55   38.80
  -1  -5  -9  266.07   21.00
  -1  -5  -9  251.57   20.90
   1  -5   9  293.97   24.10
   1  -5   9  342.87   26.30
   1   5   9  298.97   22.00
   1   5   9  296.07   28.40
  -2  -5  -9  444.66   29.10
   2  -5   9  406.76   31.70
   2  -5   9  400.06   30.80
   2   5   9  391.26   28.10
   2   5   9  382.66   28.70
   2   5   9  454.55   37.50
   3  -5   9   65.49   12.60
   3  -5   9   57.59   10.40
   3   5   9   66.49    9.60
   3   5   9   80.79   16.70
   6  -6  -9   83.29   14.40
   6  -6  -9   97.69   11.30
  -6  -6   9   87.89   13.80
  -6  -6   9   93.69   16.80
   6   6  -9  125.29   19.60
   6   6  -9   82.39   17.10
   6   6  -9   96.89   14.90
  -5  -6   9  138.99   17.50
  -5  -6   9  144.79   20.10
   5  -6  -9  151.88   18.30
   5  -6  -9  136.69   14.40
   5   6  -9  164.98   18.20
   5   6  -9  125.69   19.60
  -4  -6   9  446.66   35.10
   4  -6  -9  418.26   31.50
  -4  -6   9  390.56   32.00
   4  -6  -9  460.55   29.40
  -4   6   9  415.96   28.40
   4   6  -9  449.26   36.30
   4   6  -9  361.66   30.00
   3  -6  -9  149.09   13.80
  -3  -6   9  157.98   20.10
   3  -6  -9  111.69   14.80
  -3  -6   9  115.09   15.70
  -3   6   9  135.49   14.40
   3   6  -9  135.59   15.40
  -3   6   9  196.18   23.20
   3   6  -9  146.99   20.60
   2  -6  -9  238.38   19.70
  -2  -6   9  207.68   24.20
  -2  -6   9  199.58   22.80
   2  -6  -9  227.18   20.00
   2   6  -9  223.78   18.50
  -2   6   9  216.08   19.10
   2   6  -9  277.27   28.10
  -2   6   9  309.77   27.10
  -1  -6   9  261.87   26.40
   1  -6  -9  261.27   20.80
  -1  -6   9  244.58   23.10
   1  -6  -9  251.17   19.90
  -1   6   9  245.18   20.30
   1   6  -9  258.17   27.20
  -1   6   9  195.28   25.10
   0  -6   9  281.97   24.50
   0  -6  -9  307.87   22.70
   0  -6   9  288.27   24.90
   0  -6  -9  233.18   19.90
   0   6  -9  274.87   26.00
   0   6   9  291.87   28.70
   0   6   9  248.38   20.80
   1  -6   9  195.68   21.50
   1  -6   9  224.08   23.10
  -1  -6  -9  206.28   16.80
  -1  -6  -9  193.98   17.90
   1   6   9  186.88   25.40
   1   6   9  193.48   17.40
   2  -6   9   65.69   12.00
   2  -6   9   59.69   12.80
   2   6   9   93.29   12.10
   2   6   9  108.99   13.90
   2   6   9   76.19   15.50
   3  -6   9   18.00   10.50
   3  -6   9   20.10    7.60
   3   6   9   18.30    5.60
   5  -7  -9  343.97   30.00
  -5  -7   9  415.06   31.90
  -5  -7   9  352.56   33.40
   5   7  -9  427.06   31.60
   5   7  -9  342.67   36.80
  -4  -7   9    4.20    7.30
   4  -7  -9    0.20    4.70
  -4  -7   9   -1.80    6.60
   4  -7  -9   -4.10    3.70
  -4   7   9    8.00    5.30
   4   7  -9    0.60    4.30
   4   7  -9   10.70    7.70
  -3  -7   9  285.47   26.80
   3  -7  -9  302.57   25.20
   3  -7  -9  326.17   23.90
  -3  -7   9  253.37   28.90
  -3   7   9  271.67   22.70
  -3   7   9  354.46   31.00
   3   7  -9  264.77   23.90
   3   7  -9  282.87   31.50
   2  -7  -9  131.39   15.90
   2  -7  -9  142.49   15.90
  -2  -7   9  135.59   18.50
  -2  -7   9  180.28   22.10
   2   7  -9  141.39   20.60
  -2   7   9  140.49   20.70
  -2   7   9  150.28   16.10
  -1  -7   9   88.79   16.10
   1  -7  -9  113.99   13.90
   1  -7  -9  136.39   15.80
  -1  -7   9  126.49   18.20
   1   7  -9  133.59   19.30
  -1   7   9  112.59   17.70
  -1   7   9  108.49   13.90
   0  -7  -9   92.89   11.60
   0  -7   9   75.49   14.30
   0  -7  -9  107.19   14.00
   0  -7   9   99.09   15.80
   0   7   9   76.29   15.40
   0   7   9   97.79   12.80
  -1  -7  -9   34.60    8.00
   1  -7   9   46.00   11.70
   1  -7   9   32.40   10.10
   1   7   9   16.70    8.80
   1   7   9   29.80    8.10
   2  -7   9   55.69   11.70
   2   7   9   48.00   10.20
   2   7   9   38.10   14.00
   4  -8  -9  580.94   41.70
  -4  -8   9  623.74   44.80
  -4  -8   9  545.65   44.30
   4   8  -9  605.44   42.20
   4   8  -9  509.85   45.60
   3  -8  -9   50.49   10.20
  -3  -8   9   17.40   10.00
   3  -8  -9   54.89    9.90
  -3  -8   9   37.70   10.70
   3   8  -9   71.79   16.10
  -3   8   9   18.20   10.70
  -3   8   9   38.00    8.00
  -2  -8   9   33.00   10.30
  -2  -8   9   28.70   11.50
   2  -8  -9   25.50    7.90
   2  -8  -9   23.50    7.60
  -2   8   9   14.60    7.90
  -2   8   9   30.70    8.20
   2   8  -9   19.50   11.50
  -1  -8   9  184.18   23.70
   1  -8  -9  242.28   20.00
  -1  -8   9  216.58   25.80
   1  -8  -9  187.28   20.90
  -1   8   9  215.18   27.10
   1   8  -9  249.38   28.90
  -1   8   9  246.78   21.70
   0  -8   9  126.49   18.70
   0  -8   9  154.98   20.90
   0  -8  -9  154.78   18.00
   0   8   9  113.79   15.70
   0   8   9  129.89   21.40
   8   0 -10  279.27   24.30
   8   0 -10  302.27   25.70
   8   0 -10  326.57   24.80
   7   0 -10    3.50    4.70
   7   0 -10   10.00    5.60
   7   0 -10   -0.30    4.30
  -6   0  10  165.28   15.80
   6   0 -10  171.28   16.60
   6   0 -10  177.98   18.40
   6   0 -10  181.78   15.10
   5   0 -10  182.78   16.60
   5   0 -10  191.58   14.80
  -5   0  10  180.78   16.10
   5   0 -10  176.58   16.80
   4   0 -10  155.28   16.40
   4   0 -10  148.99   12.10
  -4   0  10  150.58   14.10
   4   0 -10  163.98   14.50
  -4   0  10  147.29   11.70
  -3   0  10 2925.71  146.29
  -3   0  10 2570.24  146.89
   3   0 -10 2449.85  146.99
   3   0 -10 2659.33  144.49
   3   0 -10 2696.33  148.79
   2   0 -10    8.40    3.60
  -2   0  10   13.30    3.90
   2   0 -10   14.90    5.40
   2   0 -10   11.50    2.60
  -2   0  10    3.60    3.20
  -1   0  10  168.78   17.10
  -1   0  10  156.28   12.40
   1   0 -10  143.49   15.40
  -1   0  10  147.69   12.30
   1   0 -10  140.79   12.70
   1   0 -10  129.69    8.80
   0   0  10  103.89   14.90
   0   0  10  119.79   11.00
   0   0 -10  140.59   12.00
   0   0  10  108.79   10.20
   1   0  10   32.00    6.20
   1   0  10   36.90    6.00
   1   0  10   29.00    8.90
  -1   0 -10   30.80    5.70
   2   0  10   56.59    8.60
   2   0  10   61.19    7.90
   2   0  10   58.39   11.60
   3   0  10    6.50    5.70
   3   0  10    1.10    4.00
   3   0  10   -0.40    2.80
   4   0  10   32.70    5.80
   4   0  10   43.70    9.00
   4   0  10   33.90   10.40
   8  -1 -10   83.09   12.70
   8  -1 -10   59.69   10.00
   8  -1 -10   91.49   13.40
   8   1 -10   85.49   12.20
   8   1 -10   68.79   12.70
   8   1 -10   77.09   12.10
   7  -1 -10   26.20    6.90
   7  -1 -10   29.00    7.80
   7  -1 -10   24.50    6.90
   7   1 -10   16.90    6.10
   7   1 -10   19.90    6.70
   7   1 -10   31.70    8.80
   6  -1 -10  204.88   18.30
   6  -1 -10  205.78   17.80
  -6  -1  10  244.28   20.10
   6  -1 -10  246.38   17.50
   6   1 -10  187.98   16.40
   6   1 -10  186.58   18.50
   6   1 -10  208.88   18.40
  -6   1  10  194.18   16.40
   5  -1 -10  122.29   12.80
  -5  -1  10   95.99   10.50
   5  -1 -10  141.29   15.40
   5  -1 -10  104.09   10.60
  -5  -1  10  103.19   13.10
  -5   1  10  150.88   12.80
   5   1 -10  113.89   14.20
   5   1 -10  106.39   13.10
   5   1 -10  145.69   11.90
  -4  -1  10   49.50    8.80
   4  -1 -10   75.89   10.60
  -4  -1  10   54.59    7.30
   4  -1 -10   58.19    8.10
   4   1 -10   62.09    9.80
  -4   1  10   53.89    6.00
   4   1 -10   38.40    8.40
   4   1 -10   64.59    7.80
  -4   1  10   38.60    7.10
  -3  -1  10  739.93   45.90
   3  -1 -10  748.33   47.00
   3  -1 -10  774.92   45.20
  -3  -1  10  828.42   45.40
   3   1 -10  699.13   46.20
   3   1 -10  727.33   42.90
   3   1 -10  720.53   46.80
  -3   1  10  703.03   42.90
  -3   1  10  743.43   44.60
   2  -1 -10  366.96   25.30
   2  -1 -10  356.26   26.70
  -2  -1  10  355.56   25.60
  -2  -1  10  373.26   25.80
   2   1 -10  371.16   26.50
  -2   1  10  393.76   24.40
   2   1 -10  392.16   28.10
  -2   1  10  384.26   30.10
   2   1 -10  421.46   23.10
  -2   1  10  373.16   25.20
   1  -1 -10  294.77   21.80
  -1  -1  10  278.87   20.00
  -1  -1  10  263.07   19.90
  -1  -1  10  264.47   22.40
   1  -1 -10  248.08   18.80
  -1   1  10  281.67   19.10
   1   1 -10  263.47   20.30
  -1   1  10  238.48   18.10
  -1   1  10  273.37   24.10
   0  -1 -10  156.48   12.90
   0  -1  10  149.99   15.60
   0  -1  10  175.78   14.70
   0  -1  10  155.68   13.30
   0   1  10  145.89   12.60
   0   1  10  144.99   18.20
   0   1  10  132.59   11.90
   0   1 -10  152.08   13.90
   1  -1  10   66.59    9.00
   1  -1  10   57.59   10.50
  -1  -1 -10   57.99    7.80
   1  -1  10   75.19   10.20
  -1   1 -10   72.19    9.50
   1   1  10   77.69    8.70
   1   1  10   71.69    9.20
   1   1  10   50.09   11.50
   2  -1  10   33.10    6.80
   2  -1  10   19.50    7.50
   2  -1  10   27.40    6.00
   2   1  10   44.90   11.40
   2   1  10   43.70    7.00
   2   1  10   24.40    5.20
   3  -1  10  259.37   19.20
   3  -1  10  265.57   24.00
   3  -1  10  241.88   21.10
   3   1  10  277.07   20.70
   3   1  10  265.37   26.00
   3   1  10  245.08   18.00
   4  -1  10  134.69   15.70
   4  -1  10  134.99   12.60
   4   1  10  156.78   15.60
   4   1  10  143.39   11.80
   4   1  10  121.49   19.20
   8  -2 -10   64.99   10.20
   8  -2 -10   45.00   10.60
   8  -2 -10   74.19   10.80
   8   2 -10   69.39   11.80
   8   2 -10   78.09   14.50
   7  -2 -10  374.36   28.20
   7  -2 -10  393.96   30.40
   7   2 -10  457.05   30.80
   7   2 -10  413.66   32.90
   7   2 -10  411.86   29.20
   6  -2 -10  199.28   17.10
  -6  -2  10  206.18   21.20
   6  -2 -10  214.98   19.00
   6   2 -10  209.18   18.10
  -6   2  10  226.58   17.10
   6   2 -10  229.68   23.10
   6   2 -10  195.18   17.90
   5  -2 -10  120.79   12.60
  -5  -2  10  120.59   12.80
   5  -2 -10  110.59   14.30
  -5  -2  10  124.69   15.30
   5   2 -10  125.89   14.30
  -5   2  10  122.89   11.60
   5   2 -10  117.69   13.00
   5   2 -10  136.99   16.60
  -4  -2  10  101.29   13.40
   4  -2 -10  120.29   13.80
   4  -2 -10  106.39   11.30
  -4  -2  10   91.09   11.40
   4   2 -10  120.79   10.60
   4   2 -10  105.49   13.80
   4   2 -10   87.79   12.30
  -4   2  10   98.79   10.60
   3  -2 -10  180.18   16.00
  -3  -2  10  173.48   16.30
  -3  -2  10  166.88   14.90
   3  -2 -10  151.28   13.30
   3   2 -10  187.08   18.60
   3   2 -10  145.99   16.30
   3   2 -10  172.48   13.20
  -3   2  10  165.78   11.80
  -3   2  10  153.38   13.70
   2  -2 -10   27.90    5.50
  -2  -2  10   22.60    6.00
  -2  -2  10   33.90    7.10
   2  -2 -10   48.40    8.60
  -2   2  10   29.80   10.30
  -2   2  10   36.00    5.20
   2   2 -10   35.60    4.80
  -2   2  10   29.70    5.60
   2   2 -10   37.60    7.90
  -1  -2  10  333.37   24.40
  -1  -2  10  400.16   25.80
   1  -2 -10  327.67   24.80
   1  -2 -10  315.47   22.90
  -1   2  10  356.76   23.20
  -1   2  10  347.67   22.20
  -1   2  10  355.26   28.80
   1   2 -10  318.97   25.40
   0  -2  10  229.28   19.30
   0  -2  10  242.68   18.70
   0  -2  10  236.88   19.30
   0  -2 -10  212.18   18.20
   0  -2 -10  221.28   16.60
   0   2  10  213.78   23.00
   0   2 -10  234.68   18.90
   0   2  10  235.68   17.00
   0   2  10  214.48   16.00
  -1  -2 -10  526.15   33.00
   1  -2  10  584.54   36.20
   1  -2  10  568.44   36.10
   1  -2  10  515.35   34.40
   1   2  10  498.65   32.70
  -1   2 -10  523.15   35.10
   1   2  10  471.35   38.90
   1   2  10  537.15   33.10
   2  -2  10  339.17   25.50
   2  -2  10  328.37   23.60
   2  -2  10  300.67   24.10
   2   2  10  315.07   28.40
   2   2  10  335.47   22.10
   2   2  10  303.37   22.50
   3  -2  10   44.60    7.90
   3  -2  10   45.30    9.10
   3   2  10   34.90    7.30
   3   2  10   39.80    6.30
   3   2  10   31.90   11.20
   4  -2  10   -3.60    4.40
   4  -2  10    0.50    4.00
   4   2  10   -1.20    2.50
   4   2  10    3.00    4.60
   4   2  10   -0.70    5.70
   7  -3 -10   60.19   11.70
   7  -3 -10   28.50    6.70
   7   3 -10   54.49   11.90
   7   3 -10   36.10    7.90
   7   3 -10   44.50    9.80
   6  -3 -10  565.34   40.40
  -6  -3  10  532.75   40.50
   6  -3 -10  608.04   37.30
   6   3 -10  642.74   43.60
   6   3 -10  561.14   38.30
   6   3 -10  590.34   39.40
   5  -3 -10  288.57   21.20
  -5  -3  10  286.97   22.60
   5  -3 -10  288.07   24.10
  -5  -3  10  283.87   24.50
   5   3 -10  296.67   22.30
   5   3 -10  272.27   25.80
   5   3 -10  349.27   24.00
  -5   3  10  290.57   21.00
   4  -3 -10  481.95   35.50
  -4  -3  10  559.04   37.90
   4  -3 -10  516.85   33.40
  -4  -3  10  485.55   35.00
   4   3 -10  597.74   39.60
   4   3 -10  567.94   34.20
  -4   3  10  510.85   33.10
  -3  -3  10   38.20    8.70
   3  -3 -10   27.80    7.30
   3  -3 -10   22.00    5.00
  -3  -3  10   14.50    5.80
  -3   3  10   29.50    6.00
  -3   3  10   17.50    3.30
  -3   3  10   31.80   10.60
   3   3 -10   27.90    5.60
   3   3 -10   20.60    8.30
  -2  -3  10   36.50    8.70
  -2  -3  10   36.60    8.20
   2  -3 -10   38.90    6.30
   2  -3 -10   51.59    9.00
   2   3 -10   45.60    5.90
  -2   3  10   35.10    5.10
  -2   3  10   43.00    6.70
  -2   3  10   43.10   10.20
   2   3 -10   27.50    7.40
   1  -3 -10   45.60    7.80
  -1  -3  10   50.69    9.40
   1  -3 -10   42.10    7.30
  -1  -3  10   55.39    9.60
   1   3 -10   41.70    8.70
  -1   3  10   56.59   11.80
  -1   3  10   43.10    6.80
  -1   3  10   40.10    5.60
   0  -3 -10  233.38   19.80
   0  -3  10  304.07   22.30
   0  -3  10  236.58   20.50
   0  -3 -10  264.67   19.20
   0   3  10  261.37   26.10
   0   3 -10  262.27   22.10
   0   3  10  249.08   18.90
   0   3  10  254.27   17.80
   1  -3  10  160.08   16.60
   1  -3  10  146.79   13.90
   1  -3  10  170.98   17.20
  -1  -3 -10  130.29   12.30
   1   3  10  138.49   19.80
  -1   3 -10  163.48   17.80
   1   3  10  144.59   13.00
   2  -3  10  318.47   25.40
   2  -3  10  341.57   24.50
   2   3  10  312.27   22.00
   2   3  10  285.37   29.40
   3  -3  10   12.50    6.00
   3  -3  10   15.30    6.30
   3   3  10   19.80   10.20
   3   3  10   16.50    5.00
   4  -3  10   22.90    6.90
   4   3  10   19.90    9.20
   4   3  10   18.40    4.80
   7  -4 -10   47.00    8.10
   7  -4 -10   73.99   12.60
   7   4 -10   81.59   15.70
   7   4 -10   62.69   11.30
  -6  -4  10  493.05   38.80
   6  -4 -10  553.74   38.70
  -6  -4  10  487.65   36.60
   6  -4 -10  539.25   34.30
   6   4 -10  511.85   37.00
   6   4 -10  625.14   43.10
  -5  -4  10  328.27   27.20
  -5  -4  10  293.07   23.60
   5  -4 -10  285.27   23.80
   5  -4 -10  269.27   20.50
  -5   4  10  292.37   20.90
   5   4 -10  291.37   26.60
   5   4 -10  273.07   22.30
  -4  -4  10  117.79   16.20
   4  -4 -10  141.99   16.40
   4  -4 -10  134.79   12.70
  -4  -4  10  141.09   16.10
  -4   4  10  137.39   12.80
   4   4 -10  134.99   14.50
   4   4 -10  123.49   17.40
   3  -4 -10   50.49    9.50
  -3  -4  10   61.59   11.20
  -3  -4  10   56.09   10.30
   3  -4 -10   61.39    8.50
  -3   4  10   44.10    7.60
  -3   4  10   50.49   12.60
   3   4 -10   39.10    9.50
   3   4 -10   56.69    7.70
   2  -4 -10  429.26   29.30
   2  -4 -10  475.15   31.60
  -2  -4  10  403.46   31.50
  -2  -4  10  489.35   34.00
  -2   4  10  462.15   26.50
  -2   4  10  460.55   29.60
  -2   4  10  384.96   35.10
   2   4 -10  393.86   33.20
  -1  -4  10   52.49   10.70
   1  -4 -10   53.09    9.40
   1  -4 -10   66.49    9.00
  -1  -4  10   55.39   10.00
   1   4 -10   57.89   11.60
  -1   4  10   55.09    8.50
  -1   4  10   80.39   15.30
   0  -4 -10   95.79   11.00
   0  -4 -10  104.19   12.50
   0  -4  10   80.59   13.00
   0  -4  10   80.59   12.30
   0   4 -10   81.79   12.90
   0   4  10   80.99   10.00
   0   4  10   95.49   16.30
  -1  -4 -10  299.07   21.20
  -1  -4 -10  306.67   22.50
   1  -4  10  270.37   23.30
   1  -4  10  306.17   25.00
   1   4  10  258.87   20.30
   1   4  10  272.17   27.00
   2  -4  10    6.20    5.40
   2  -4  10   15.90    6.20
   2   4  10   18.40   10.30
   2   4  10   12.90    4.90
   3  -4  10  208.68   22.40
   3  -4  10  225.98   20.70
   3   4  10  215.78   28.10
   3   4  10  264.47   18.80
   6  -5 -10   47.70   11.20
  -6  -5  10   60.49   12.70
   6  -5 -10   49.10    8.10
  -6  -5  10   56.59   10.80
   6   5 -10   75.69   15.70
   6   5 -10   49.10   10.60
  -5  -5  10   10.80    6.60
   5  -5 -10   -1.20    5.00
  -5  -5  10   -3.50    6.20
   5  -5 -10    5.00    3.10
   5   5 -10    2.30    4.90
   5   5 -10    6.00    7.90
  -5   5  10    4.30    4.10
  -4  -5  10  716.53   52.09
   4  -5 -10  822.02   50.59
  -4  -5  10  718.33   49.90
   4  -5 -10  753.32   46.60
   4   5 -10  730.03   53.59
  -4   5  10  797.62   47.00
   3  -5 -10  185.78   17.70
   3  -5 -10  168.28   15.30
  -3  -5  10  180.38   21.50
  -3  -5  10  132.99   17.60
  -3   5  10  168.48   15.30
   3   5 -10  197.08   16.20
  -3   5  10  168.18   22.40
   3   5 -10  209.28   23.80
  -2  -5  10  214.98   23.00
   2  -5 -10  201.98   16.70
  -2  -5  10  182.68   20.10
   2  -5 -10  192.98   18.00
  -2   5  10  194.08   23.70
  -2   5  10  179.28   16.30
   2   5 -10  174.58   22.20
   1  -5 -10   44.60    8.60
  -1  -5  10   64.49   12.10
  -1  -5  10   48.60   11.50
   1  -5 -10   73.99   10.60
   1   5 -10   82.29   14.40
  -1   5  10   57.69   13.50
  -1   5  10   53.09    8.70
   0  -5  10   22.60    7.50
   0  -5 -10   22.00    6.20
   0  -5 -10   24.80    6.20
   0  -5  10   47.40   10.70
   0   5 -10   21.10    8.30
   0   5  10   24.00    5.90
   0   5  10   29.20    9.80
   1  -5  10  100.69   15.10
  -1  -5 -10  114.39   13.30
   1  -5  10  148.29   18.30
  -1  -5 -10  154.78   14.10
   1   5  10  119.59   13.30
   1   5  10  138.29   20.60
   2  -5  10  190.98   19.80
   2  -5  10  177.78   20.30
   2   5  10  178.88   15.90
   2   5  10  139.69   21.30
   3  -5  10   31.40    9.00
  -6  -6  10   57.99   12.90
  -6  -6  10   39.70   10.30
   6   6 -10   44.30   10.40
   5  -6 -10   71.79   10.20
   5  -6 -10   89.09   13.90
  -5  -6  10   60.19   14.10
  -5  -6  10   89.29   14.20
   5   6 -10   89.89   16.20
   5   6 -10   83.09   12.90
   4  -6 -10   22.50    6.20
  -4  -6  10    9.80    7.80
  -4  -6  10   32.20    9.60
   4  -6 -10   25.00    7.90
   4   6 -10   21.70    7.00
   4   6 -10    8.30    9.00
  -4   6  10   17.20    6.20
  -3  -6  10  184.68   21.30
   3  -6 -10  179.58   16.70
   3  -6 -10  205.08   18.90
  -3  -6  10  176.58   22.40
  -3   6  10  206.48   16.80
  -3   6  10  256.87   26.00
   3   6 -10  122.79   20.40
  -2  -6  10  380.06   30.90
   2  -6 -10  347.37   25.70
  -2  -6  10  399.26   30.50
   2  -6 -10  322.87   26.00
  -2   6  10  307.17   24.90
  -2   6  10  336.47   31.20
   2   6 -10  328.77   30.80
   1  -6 -10  329.47   25.00
  -1  -6  10  309.17   27.60
   1  -6 -10  325.97   24.50
  -1  -6  10  338.27   29.20
  -1   6  10  310.27   31.10
  -1   6  10  343.97   25.10
   1   6 -10  307.07   28.30
   0  -6 -10  136.79   15.00
   0  -6 -10  145.89   16.10
   0  -6  10  130.39   18.40
   0  -6  10  165.38   20.00
   0   6  10  154.68   16.20
   0   6  10  175.18   23.80
   1  -6  10   55.49   12.10
   1  -6  10   46.20   11.10
  -1  -6 -10   36.10   11.20
  -1  -6 -10   47.40    8.90
   1   6  10   39.00   13.40
   1   6  10   58.79    9.60
   2  -6  10   38.30   11.90
   2  -6  10   69.49   12.50
   2   6  10   46.50   10.60
  -5  -7  10   98.19   16.00
   4  -7 -10  211.28   22.40
  -4  -7  10  290.97   25.10
  -4  -7  10  166.88   24.00
   4  -7 -10  201.68   18.00
   4   7 -10  240.88   29.60
  -4   7  10  226.28   18.90
  -3  -7  10   40.50   11.20
  -3  -7  10   29.40   10.30
   3  -7 -10   49.90   10.00
   3  -7 -10   57.89    9.70
  -3   7  10   66.29   15.40
   3   7 -10   46.00   13.50
  -3   7  10   52.39    9.60
   2  -7 -10  228.58   20.20
  -2  -7  10  231.58   26.30
   2  -7 -10  181.48   19.80
  -2  -7  10  251.27   25.70
   2   7 -10  216.58   27.20
  -2   7  10  193.78   25.40
  -2   7  10  235.78   20.10
  -1  -7  10   24.40   10.10
   1  -7 -10   26.80    7.10
   1  -7 -10   35.80    8.70
  -1  -7  10   39.00   10.90
  -1   7  10   27.80    7.80
  -1   7  10   23.00   11.50
   1   7 -10   24.10   10.50
   0  -7  10  285.07   28.80
   0  -7 -10  261.17   22.10
   0  -7  10  240.18   26.20
   0   7  10  240.28   21.00
   0   7  10  266.67   28.00
   1  -7  10   43.80   13.20
  -1  -7 -10   31.10    8.30
   7   0 -11  109.89   13.00
   7   0 -11  104.19   14.10
   7   0 -11   90.39   13.10
   6   0 -11  710.03   44.00
  -6   0  11  672.83   45.00
   6   0 -11  749.23   46.80
   6   0 -11  688.33   45.60
  -5   0  11  356.06   26.00
   5   0 -11  356.46   24.10
   5   0 -11  334.07   26.60
   5   0 -11  391.96   27.40
   4   0 -11   29.50    6.90
  -4   0  11   27.60    5.80
   4   0 -11   29.80    5.30
   4   0 -11   27.90    6.30
  -4   0  11   25.50    6.10
  -3   0  11   28.70    6.70
   3   0 -11   33.40    8.10
  -3   0  11   29.80    6.50
   3   0 -11   27.80    4.60
   3   0 -11   29.60    7.20
  -2   0  11   20.80    5.50
   2   0 -11   12.10    4.60
  -2   0  11   13.10    4.50
   2   0 -11   17.90    6.70
   2   0 -11   15.40    3.00
  -1   0  11  123.49   16.50
   1   0 -11  123.09   13.00
  -1   0  11  122.39   12.50
  -1   0  11  106.49   11.80
   0   0  11 1243.48   76.19
   0   0  11 1202.58   70.89
   0   0  11 1203.28   71.49
   0   0 -11 1282.87   71.89
   1   0  11    2.30    4.10
   1   0  11    2.90    6.30
  -1   0 -11   -1.20    3.50
   1   0  11    7.60    3.80
   2   0  11  115.29   17.10
   2   0  11  131.09   12.30
   2   0  11  147.39   15.20
   3   0  11  618.54   46.40
   3   0  11  613.74   39.00
   3   0  11  656.43   42.00
   7  -1 -11  381.76   27.30
   7  -1 -11  354.46   29.10
   7  -1 -11  363.36   28.00
   7   1 -11  351.16   29.50
   7   1 -11  370.16   27.70
   7   1 -11  446.66   29.90
   6  -1 -11    8.60    5.80
  -6  -1  11   -0.30    5.40
   6  -1 -11    2.30    3.70
   6  -1 -11   -0.20    4.60
   6   1 -11    4.70    6.00
   6   1 -11    0.30    4.30
   6   1 -11    6.00    4.20
  -6   1  11    0.60    2.80
  -5  -1  11  127.39   15.10
   5  -1 -11  142.59   16.00
   5  -1 -11  132.99   12.00
   5  -1 -11  158.68   15.70
   5   1 -11  138.29   12.50
  -5   1  11  128.09   14.00
   5   1 -11  146.89   15.50
   5   1 -11  116.19   15.30
   4  -1 -11  186.08   13.70
  -4  -1  11  185.28   15.40
   4  -1 -11  175.68   15.60
   4  -1 -11  173.18   18.40
  -4  -1  11  170.38   17.70
  -4   1  11  151.88   14.20
   4   1 -11  203.28   17.90
   4   1 -11  172.98   16.30
   4   1 -11  191.88   14.30
  -3  -1  11  162.38   16.80
  -3  -1  11  180.98   14.90
   3  -1 -11  152.38   15.10
   3  -1 -11  166.28   14.80
   3   1 -11  158.78   17.30
  -3   1  11  186.38   14.80
   3   1 -11  165.68   12.60
   3   1 -11  165.58   17.20
   2  -1 -11  205.38   16.10
  -2  -1  11  192.18   16.60
   2  -1 -11  179.48   17.40
  -2  -1  11  192.08   16.20
  -2   1  11  193.98   14.70
  -2   1  11  171.48   15.20
  -2   1  11  208.88   21.50
   2   1 -11  194.38   17.40
   1  -1 -11  278.27   22.10
   1  -1 -11  290.17   20.20
  -1  -1  11  260.97   22.80
  -1  -1  11  267.87   21.10
  -1  -1  11  271.77   20.40
   1   1 -11  248.68   21.20
  -1   1  11  286.87   20.10
  -1   1  11  285.87   19.80
  -1   1  11  280.27   25.50
   0  -1  11  116.89   12.30
   0  -1 -11   91.39   10.90
   0  -1  11  104.89   12.60
   0  -1  11  129.59   16.00
   0   1 -11  135.99   14.20
   0   1  11  105.19   11.70
   0   1  11  123.59   17.20
   0   1  11  123.49   11.30
   1  -1  11  361.96   25.90
  -1  -1 -11  346.67   23.90
   1  -1  11  354.16   24.70
   1  -1  11  325.77   26.90
   1   1  11  358.06   24.50
   1   1  11  344.87   30.20
   1   1  11  328.67   23.30
   2  -1  11  448.96   30.50
   2  -1  11  434.46   31.40
   2  -1  11  416.86   33.80
   2   1  11  512.15   37.60
   2   1  11  462.55   30.80
   2   1  11  454.45   29.30
   3  -1  11  357.76   25.10
   3  -1  11  258.37   21.00
   3   1  11  279.27   22.30
   3   1  11  274.07   20.00
   3   1  11  288.67   28.50
   7  -2 -11   56.99    8.80
   7  -2 -11   54.69   10.90
   7  -2 -11   47.70    9.30
   7   2 -11   60.59   10.40
   7   2 -11   64.29   12.70
   7   2 -11   49.90    9.80
  -6  -2  11   96.79   14.40
   6  -2 -11   78.49   10.80
   6  -2 -11   84.79   12.50
   6   2 -11   63.59   12.70
  -6   2  11   74.19   10.10
   6   2 -11   93.69   12.40
   6   2 -11   94.89   11.80
   5  -2 -11  181.38   15.10
  -5  -2  11  169.88   19.10
   5  -2 -11  195.98   17.70
   5   2 -11  150.18   13.90
   5   2 -11  152.08   16.50
  -5   2  11  135.69   13.50
   5   2 -11  117.99   16.60
   4  -2 -11  521.95   33.90
  -4  -2  11  454.05   35.50
  -4  -2  11  568.94   34.70
   4  -2 -11  564.44   36.70
   4   2 -11  557.74   33.10
  -4   2  11  515.55   33.30
   4   2 -11  481.25   36.80
   4   2 -11  502.55   35.40
  -3  -2  11  256.07   22.00
  -3  -2  11  287.67   23.40
   3  -2 -11  289.47   23.40
   3  -2 -11  312.37   21.70
  -3   2  11  286.37   19.30
   3   2 -11  271.87   23.80
  -3   2  11  328.37   21.70
   2  -2 -11  218.48   20.10
   2  -2 -11  238.98   18.50
  -2  -2  11  246.58   20.00
  -2  -2  11  221.38   19.60
  -2   2  11  258.97   17.20
  -2   2  11  254.57   18.60
  -2   2  11  236.38   24.50
   2   2 -11  259.87   21.90
  -1  -2  11  300.47   23.30
   1  -2 -11  287.77   21.40
   1  -2 -11  298.07   23.90
  -1  -2  11  286.17   23.00
  -1   2  11  289.77   26.50
  -1   2  11  327.77   21.90
   1   2 -11  273.17   23.20
  -1   2  11  319.47   20.90
   0  -2  11  499.55   34.80
   0  -2  11  479.45   35.10
   0  -2  11  500.15   33.90
   0  -2 -11  507.45   34.60
   0  -2 -11  530.95   32.80
   0   2  11  536.65   32.80
   0   2  11  503.55   32.10
   0   2  11  499.95   39.20
   0   2 -11  509.55   35.20
   1  -2  11   10.10    6.00
   1  -2  11   15.50    5.80
  -1  -2 -11   12.40    4.00
   1  -2  11   18.20    6.00
   1   2  11   27.60    5.70
   1   2  11   23.90   10.70
   1   2  11   22.70    5.60
   2  -2  11  172.38   17.80
   2  -2  11  163.58   16.60
   2   2  11  147.99   13.70
   2   2  11  169.28   22.00
   2   2  11  146.49   13.20
   3  -2  11  155.08   17.30
   3  -2  11  152.08   16.50
   3   2  11  119.19   20.00
   3   2  11  160.78   13.20
   3   2  11  144.39   15.10
   7  -3 -11   20.20    7.90
   7  -3 -11   28.60    6.80
   7   3 -11   14.10    6.30
   7   3 -11   19.40    9.40
   7   3 -11   15.60    7.30
   6  -3 -11   16.10    7.30
   6  -3 -11   30.00    6.20
  -6  -3  11   27.70    9.40
   6   3 -11   11.30    5.90
   6   3 -11   22.20    8.50
   6   3 -11   13.90    5.80
   5  -3 -11   59.99   10.80
   5  -3 -11   62.49    9.00
  -5  -3  11   45.20    8.80
  -5  -3  11   83.69   13.60
   5   3 -11   82.09   14.30
   5   3 -11   81.69   11.30
  -5   3  11   50.99    8.20
   5   3 -11   63.19    9.50
  -4  -3  11   54.09    9.60
   4  -3 -11   46.30    7.50
  -4  -3  11   62.29   11.80
   4  -3 -11   68.59   11.30
   4   3 -11   65.69   12.30
   4   3 -11   56.49    8.40
  -4   3  11   50.29    8.20
  -3  -3  11 1363.26   84.19
   3  -3 -11 1424.26   80.39
  -3  -3  11 1455.65   82.89
   3  -3 -11 1327.17   82.59
   3   3 -11 1343.47   85.09
  -3   3  11 1498.95   80.69
  -3   3  11 1356.26   87.69
   2  -3 -11  101.09   11.20
  -2  -3  11   87.19   12.30
  -2  -3  11   93.39   13.80
   2  -3 -11  116.29   13.70
  -2   3  11   71.89    8.40
  -2   3  11   81.89   15.70
   2   3 -11   69.39   12.00
  -2   3  11   79.19   10.00
   1  -3 -11  245.58   18.70
   1  -3 -11  249.08   20.60
  -1  -3  11  209.68   20.60
  -1  -3  11  274.67   22.50
  -1   3  11  223.48   23.80
   1   3 -11  277.27   22.90
  -1   3  11  253.47   19.10
  -1   3  11  256.57   17.60
   0  -3 -11  223.18   17.90
   0  -3  11  232.78   20.80
   0  -3  11  262.47   21.30
   0  -3 -11  231.48   19.90
   0   3  11  244.08   18.30
   0   3  11  233.68   24.90
   0   3 -11  251.77   21.80
   0   3  11  189.58   16.20
  -1  -3 -11   16.50    4.70
   1  -3  11   23.70    6.90
   1  -3  11   32.70    7.80
   1   3  11   22.20   10.30
   1   3  11   21.40    4.90
   1   3  11   21.10    5.60
   2  -3  11   81.49   12.20
   2  -3  11   74.59   12.80
   2   3  11   89.49   10.30
   2   3  11   81.39   17.40
   2   3  11   90.69   10.70
   3  -3  11   31.00    8.00
   3  -3  11   38.70   11.30
   3   3  11   72.69   17.30
   3   3  11   53.39    8.90
   3   3  11   36.20    6.70
   6  -4 -11  334.97   24.20
   6  -4 -11  286.17   26.20
  -6  -4  11  341.67   30.50
   6   4 -11  339.27   30.20
   6   4 -11  364.96   26.80
  -5  -4  11  152.68   19.70
  -5  -4  11  131.49   15.70
   5  -4 -11  129.69   16.20
   5  -4 -11  124.69   13.40
  -5   4  11  128.79   13.50
   5   4 -11  163.98   21.70
   5   4 -11  142.79   15.90
   4  -4 -11  277.87   24.50
  -4  -4  11  405.56   30.10
  -4  -4  11  319.07   25.80
   4  -4 -11  336.57   23.40
   4   4 -11  363.96   29.90
  -4   4  11  277.77   22.50
   3  -4 -11   36.30    6.70
  -3  -4  11   50.39   10.00
  -3  -4  11   46.50   10.90
   3  -4 -11   42.30    9.20
  -3   4  11   67.69   15.10
   3   4 -11   30.00    9.80
  -3   4  11   40.50    7.40
  -2  -4  11  229.18   22.60
   2  -4 -11  224.78   17.70
   2  -4 -11  215.18   18.60
  -2  -4  11  236.68   24.00
   2   4 -11  230.98   24.80
  -2   4  11  239.88   17.80
  -2   4  11  254.17   24.80
  -2   4  11  175.08   15.70
  -1  -4  11  149.69   18.30
   1  -4 -11  130.79   15.40
  -1  -4  11  151.58   17.30
  -1   4  11  170.58   22.40
  -1   4  11  142.19   11.80
   1   4 -11  145.09   19.10
  -1   4  11  151.18   13.90
   0  -4  11   44.60    9.70
   0  -4  11   43.10    9.90
   0  -4 -11   32.80    7.10
   0  -4 -11   45.70    9.10
   0   4  11   35.10   11.90
   0   4  11   35.40    6.80
   0   4 -11   18.30    7.60
  -1  -4 -11   56.69    8.70
   1  -4  11   40.90   10.00
   1  -4  11   49.00   10.10
   1   4  11   45.10    7.70
   1   4  11   64.89   15.10
   2  -4  11  205.88   22.30
   2  -4  11  215.38   19.90
   2   4  11  185.98   25.40
   2   4  11  186.48   16.40
  -6  -5  11  136.89   19.50
   6   5 -11  136.19   23.80
   6   5 -11  176.48   19.20
  -5  -5  11   82.49   13.00
   5  -5 -11   65.49    9.70
   5  -5 -11   49.60   10.40
  -5  -5  11   53.19   12.60
   5   5 -11   78.19   16.00
   5   5 -11   66.09   11.50
  -5   5  11   73.39    9.80
   4  -5 -11  129.39   13.90
  -4  -5  11  132.19   18.90
   4  -5 -11  125.89   16.10
  -4   5  11  115.29   13.10
   4   5 -11  172.68   22.60
  -3  -5  11  156.68   17.70
  -3  -5  11  134.59   18.50
   3  -5 -11  115.39   12.80
   3  -5 -11  123.39   15.00
   3   5 -11  112.89   17.50
  -3   5  11  111.79   13.30
  -3   5  11  119.59   19.20
   2  -5 -11    0.20    3.00
  -2  -5  11    5.40    6.70
   2  -5 -11   -4.10    4.00
  -2  -5  11    5.10    6.00
   2   5 -11    0.00    4.60
  -2   5  11    3.90    3.30
  -2   5  11   -0.60    8.30
  -1  -5  11  142.39   18.10
   1  -5 -11  118.69   14.00
  -1  -5  11  100.79   16.60
   1  -5 -11  111.49   13.30
  -1   5  11  135.09   14.00
   1   5 -11  135.39   18.40
  -1   5  11  124.99   19.90
   0  -5 -11  152.68   16.10
   0  -5  11  159.78   19.70
   0  -5  11  136.39   17.90
   0  -5 -11  161.28   14.60
   0   5  11  122.89   20.70
   0   5  11  129.09   14.10
  -1  -5 -11  300.57   24.10
   1  -5  11  318.87   27.30
   1  -5  11  314.07   28.10
  -1  -5 -11  350.26   27.10
   1   5  11  326.17   32.70
   1   5  11  315.67   23.50
   2  -5  11   70.69   12.60
  -5  -6  11  100.99   15.80
  -5  -6  11  119.09   19.70
   5   6 -11  103.29   18.50
  -4  -6  11   36.40   12.10
   4  -6 -11   53.19   10.30
  -4  -6  11   40.00   10.80
   4  -6 -11   36.60    7.80
  -4   6  11   22.00    5.90
   4   6 -11   47.90   12.90
   3  -6 -11   41.20    8.80
  -3  -6  11   47.50   11.30
  -3  -6  11   52.79   12.30
   3  -6 -11   54.19    9.20
   3   6 -11   58.69   13.90
  -3   6  11   47.10   14.10
  -3   6  11   44.30    8.30
   2  -6 -11   41.80    9.20
  -2  -6  11   24.40    9.50
   2  -6 -11   22.50    6.70
  -2  -6  11   33.70    9.10
  -2   6  11   23.40    7.00
  -2   6  11   19.10   10.90
   2   6 -11   21.10    8.90
  -1  -6  11    5.30    6.60
   1  -6 -11   26.10    6.30
   1  -6 -11   28.70    7.90
  -1  -6  11   12.70    6.50
  -1   6  11   14.90    6.40
   1   6 -11   30.50   11.20
  -1   6  11   30.70   12.20
   0  -6  11   80.89   15.60
   0  -6 -11   94.59   12.50
   0  -6 -11   85.69   11.90
   0  -6  11   64.29   13.90
   0   6  11  100.09   12.50
   0   6  11  115.39   19.90
   1  -6  11   80.69   16.50
   3  -7 -11   73.29   12.40
  -3  -7  11   61.79   12.60
  -3  -7  11   74.29   14.40
   3  -7 -11   62.59   11.50
  -3   7  11   53.89    9.80
   3   7 -11   45.30   12.90
  -3   7  11   69.49   17.70
   2  -7 -11  142.59   15.90
  -2  -7  11  100.99   15.80
  -2  -7  11  136.19   22.50
   2  -7 -11  141.89   16.90
   2   7 -11  159.98   22.80
  -2   7  11  135.19   15.80
  -2   7  11  175.98   28.10
   1  -7 -11  327.87   25.10
  -1  -7  11  262.17   32.30
   1  -7 -11  293.97   24.20
  -1   7  11  316.67   24.80
   7   0 -12    7.10    5.90
   7   0 -12   -4.00    5.60
   7   0 -12    4.30    4.50
   6   0 -12   -0.10    5.00
   6   0 -12    0.20    3.20
  -6   0  12   -6.50    2.50
   6   0 -12    3.40    5.90
   5   0 -12   36.20    6.80
   5   0 -12   25.80    7.00
  -5   0  12   23.90    7.20
   5   0 -12   39.40    7.90
   4   0 -12  507.45   33.10
   4   0 -12  456.05   28.90
   4   0 -12  436.56   33.00
  -4   0  12  447.16   31.60
  -3   0  12  210.78   18.30
   3   0 -12  215.68   18.50
   3   0 -12  217.58   19.50
  -2   0  12  211.18   17.40
  -2   0  12  187.28   16.20
   2   0 -12  173.48   16.80
   2   0 -12  232.68   20.10
  -1   0  12    5.30    4.30
   1   0 -12    2.90    4.60
  -1   0  12    3.90    4.70
  -1   0  12    1.90    4.20
   0   0  12  382.36   26.90
   0   0  12  375.16   26.30
   0   0  12  392.16   31.20
   0   0 -12  348.77   26.30
   1   0  12    0.00    6.10
   1   0  12    4.20    4.00
   1   0  12    0.90    4.60
   2   0  12  257.67   20.00
   2   0  12  237.48   25.00
   2   0  12  272.77   22.00
   7  -1 -12   87.59   13.80
   7  -1 -12  123.89   13.80
   7  -1 -12   91.09   15.10
   7   1 -12  144.29   20.30
   7   1 -12  109.59   14.00
   7   1 -12  121.59   14.40
   6  -1 -12  154.88   13.90
  -6  -1  12  131.49   16.60
   6  -1 -12  135.59   16.00
   6  -1 -12  138.49   17.20
   6   1 -12  136.99   15.90
  -6   1  12  105.49   14.00
   6   1 -12  157.08   14.20
   6   1 -12  156.48   18.70
   5  -1 -12  186.48   16.90
  -5  -1  12  176.98   19.40
   5  -1 -12  192.88   15.30
   5  -1 -12  233.08   20.00
   5   1 -12  188.68   20.50
   5   1 -12  202.38   18.90
  -5   1  12  190.48   17.40
  -4  -1  12  172.88   18.80
   4  -1 -12  203.88   15.00
   4  -1 -12  179.28   18.40
   4  -1 -12  212.28   17.90
  -4   1  12  238.58   18.00
   4   1 -12  207.78   15.40
   4   1 -12  205.78   19.60
   4   1 -12  180.68   19.90
   3  -1 -12  379.66   28.10
  -3  -1  12  438.66   28.50
   3  -1 -12  406.56   30.30
  -3  -1  12  441.26   30.30
   3   1 -12  405.96   30.00
   3   1 -12  446.56   31.50
  -3   1  12  355.56   27.20
   2  -1 -12  213.18   17.50
   2  -1 -12  226.08   19.90
  -2  -1  12  184.08   17.20
  -2  -1  12  212.68   17.90
  -2   1  12  183.28   22.80
  -2   1  12  238.18   16.70
   2   1 -12  188.98   17.90
  -2   1  12  195.68   16.70
   1  -1 -12   54.69    8.90
  -1  -1  12   70.19   10.10
   1  -1 -12   31.70    8.40
  -1  -1  12   47.90    8.60
  -1   1  12   60.69    8.40
  -1   1  12   59.89   12.90
   1   1 -12   48.50    8.90
  -1   1  12   45.70    7.30
   0  -1  12  182.88   17.60
   0  -1 -12  215.08   17.20
   0  -1  12  220.68   17.90
   0  -1  12  207.18   19.70
   0   1  12  178.58   22.10
   0   1  12  202.08   16.80
   0   1 -12  210.08   18.20
   0   1  12  175.48   15.50
   1  -1  12   11.10    5.40
   1  -1  12   10.20    5.60
   1  -1  12   19.40    8.20
   1   1  12   23.10    8.40
   1   1  12    8.80    4.60
   1   1  12    6.90    4.20
   2  -1  12  131.99   14.60
   2  -1  12  138.89   16.50
   2   1  12  175.88   17.00
   2   1  12  149.39   20.70
   2   1  12  132.99   13.60
   7  -2 -12   77.89   10.60
   7  -2 -12   69.39   13.10
   7   2 -12   74.49   11.30
   7   2 -12   87.99   12.50
  -6  -2  12   52.19   10.90
   6  -2 -12   52.49    8.70
   6  -2 -12   61.99   11.50
   6  -2 -12   64.39   10.30
   6   2 -12   67.09   10.20
   6   2 -12   97.99   15.80
   6   2 -12   52.29    9.80
  -6   2  12   66.79   10.10
  -5  -2  12  168.48   20.50
   5  -2 -12  185.08   16.90
   5  -2 -12  223.88   19.90
  -5   2  12  189.18   16.50
   5   2 -12  207.38   22.10
   5   2 -12  182.88   18.30
   5   2 -12  201.98   16.30
   4  -2 -12  227.38   18.30
  -4  -2  12  196.18   19.30
   4  -2 -12  209.08   19.50
  -4  -2  12  230.88   18.50
   4   2 -12  190.28   22.00
  -4   2  12  214.58   17.60
   4   2 -12  208.28   19.90
   3  -2 -12    8.50    4.60
   3  -2 -12    6.90    5.20
  -3  -2  12    4.50    5.10
  -3  -2  12    2.40    3.80
   3   2 -12   12.80    6.20
  -3   2  12   11.70    5.00
  -2  -2  12   51.09   10.00
   2  -2 -12   93.29   10.90
  -2  -2  12   91.59   12.70
   2  -2 -12  104.59   13.70
  -2   2  12   73.59    8.80
  -2   2  12   75.59   15.00
   2   2 -12   69.69   11.90
  -2   2  12   87.29   10.40
   1  -2 -12  170.38   15.30
  -1  -2  12  170.28   16.50
  -1  -2  12  180.48   18.30
   1  -2 -12  216.48   18.70
  -1   2  12  162.78   14.70
  -1   2  12  175.98   14.70
  -1   2  12  179.88   22.00
   1   2 -12  192.88   20.20
   0  -2  12   23.20    7.10
   0  -2 -12   35.90    6.60
   0  -2  12   18.70    5.70
   0  -2  12   12.50    6.20
   0   2  12   30.00   10.60
   0   2 -12   30.70    8.10
   0   2  12   19.20    5.50
   0   2  12   14.90    5.30
   1  -2  12  177.68   18.90
   1  -2  12  179.58   17.00
   1   2  12  156.68   15.20
   1   2  12  188.48   15.30
   1   2  12  171.58   22.30
   2  -2  12  148.69   16.50
   2  -2  12  173.68   19.00
   2   2  12  163.88   16.30
   2   2  12  154.68   13.50
   2   2  12  170.28   22.70
   6  -3 -12  311.37   25.20
  -6  -3  12  235.18   26.50
   6  -3 -12  264.37   21.60
   6   3 -12  270.77   22.40
   6   3 -12  272.17   23.20
   6   3 -12  326.47   32.00
   5  -3 -12  319.97   26.80
  -5  -3  12  321.57   28.20
   5  -3 -12  308.37   23.70
  -5   3  12  331.27   23.30
   5   3 -12  325.57   28.60
  -4  -3  12  147.49   18.10
   4  -3 -12  129.19   13.70
   4  -3 -12  115.09   15.50
  -4  -3  12  112.49   14.30
  -4   3  12  135.69   13.90
   4   3 -12  117.59   17.20
   3  -3 -12   12.00    5.40
  -3  -3  12    8.70    7.10
  -3  -3  12   14.30    6.60
   3  -3 -12   16.40    4.80
  -3   3  12   20.00    5.20
   3   3 -12   13.30    8.10
   2  -3 -12   40.40    9.30
  -2  -3  12   66.59   11.50
   2  -3 -12   40.40    7.10
  -2  -3  12   31.70    8.50
   2   3 -12   38.30    9.20
  -2   3  12   39.40    7.20
  -2   3  12   26.30   11.40
  -1  -3  12  251.27   22.50
   1  -3 -12  251.57   19.40
  -1  -3  12  266.77   22.30
   1  -3 -12  249.68   21.60
  -1   3  12  263.27   19.60
   1   3 -12  211.88   23.30
  -1   3  12  257.77   18.00
  -1   3  12  190.58   24.80
   0  -3 -12  153.68   14.20
   0  -3  12  138.19   16.70
   0  -3  12  138.89   16.80
   0  -3 -12  190.28   17.30
   0   3  12  149.29   13.40
   0   3  12  137.79   13.50
   0   3  12  148.09   20.60
   1  -3  12  147.09   17.70
   1  -3  12  143.99   17.50
   1   3  12  163.88   14.40
   1   3  12  154.38   13.50
   1   3  12  123.69   20.60
   2  -3  12  345.57   27.30
   2  -3  12  323.57   31.10
   2   3  12  358.16   26.80
   2   3  12  350.46   25.20
   2   3  12  334.07   31.70
  -6  -4  12    3.80    7.80
  -5  -4  12   21.70    9.30
   5  -4 -12   40.60   10.00
   5  -4 -12   25.20    6.70
  -5   4  12   21.10    6.40
   5   4 -12   23.30    8.60
  -4  -4  12   37.20   10.90
   4  -4 -12   25.80    8.50
  -4  -4  12   35.90    8.80
   4  -4 -12   32.40    6.70
  -4   4  12   24.00    5.60
   4   4 -12   30.70    9.60
  -3  -4  12  554.24   40.20
  -3  -4  12  487.35   36.60
   3  -4 -12  540.25   37.40
   3  -4 -12  549.65   35.10
  -3   4  12  543.65   42.90
  -3   4  12  500.15   34.40
   3   4 -12  517.85   40.80
  -2  -4  12   24.10    7.80
   2  -4 -12   28.20    7.00
   2  -4 -12   35.00    7.80
  -2  -4  12   30.50    8.90
   2   4 -12   34.30   10.80
  -2   4  12   56.69   14.00
  -2   4  12   37.80    7.50
  -1  -4  12  412.26   31.70
   1  -4 -12  363.86   28.90
  -1  -4  12  305.57   29.00
   1  -4 -12  422.26   27.80
   1   4 -12  401.76   32.80
  -1   4  12  398.46   35.70
  -1   4  12  388.66   25.50
  -1   4  12  404.56   27.30
   0  -4 -12   51.49    8.40
   0  -4  12   59.29   12.20
   0  -4  12   43.20   10.70
   0  -4 -12   54.89    9.50
   0   4  12   55.49   14.00
   0   4  12   48.30    7.50
   0   4  12   49.50    7.90
   1  -4  12   89.59   14.60
   1  -4  12   57.59   11.60
   1   4  12   66.59    9.10
   1   4  12   61.59    9.00
   1   4  12   63.39   14.20
  -5  -5  12   57.19   13.00
  -5   5  12   71.39   10.00
   5   5 -12   55.19   13.80
   4  -5 -12   27.60    6.50
  -4  -5  12   40.30   12.40
   4  -5 -12   35.80    8.70
  -4  -5  12   48.10    9.90
   4   5 -12   28.00   12.00
  -4   5  12   32.60    6.80
   3  -5 -12    7.70    6.30
   3  -5 -12   11.50    5.20
  -3  -5  12    7.70    7.20
  -3  -5  12   15.50    8.70
  -3   5  12   13.20    5.50
  -3   5  12    6.80   10.10
   3   5 -12    4.90    8.10
  -2  -5  12  268.97   24.90
  -2  -5  12  277.57   28.90
   2  -5 -12  269.77   23.20
   2  -5 -12  247.68   21.00
  -2   5  12  257.67   27.80
  -2   5  12  270.17   21.20
   2   5 -12  286.37   30.10
   1  -5 -12  212.08   19.20
  -1  -5  12  240.98   24.60
   1  -5 -12  228.78   18.80
  -1  -5  12  193.08   23.50
  -1   5  12  216.28   27.00
  -1   5  12  195.78   18.20
   1   5 -12  221.78   29.20
   0  -5  12  220.28   24.70
   0  -5  12  201.38   24.50
   0  -5 -12  258.27   20.70
   0   5  12  255.17   20.20
   0   5  12  308.17   30.60
  -3  -6  12  251.17   26.90
   3  -6 -12  258.87   21.40
  -3  -6  12  289.57   30.10
   3  -6 -12  289.17   25.10
  -3   6  12  279.17   22.40
   3   6 -12  275.77   30.40
  -2  -6  12   32.20    9.80
   2  -6 -12   21.70    6.70
   2  -6 -12   22.60    7.70
  -2   6  12   25.80    7.50
   2   6 -12   27.30   11.50
   1  -6 -12  151.28   16.20
   1  -6 -12  145.49   16.30
  -1  -6  12  135.69   18.90
  -1   6  12  168.98   19.00
   6   0 -13  455.35   35.00
  -6   0  13  552.64   36.10
   6   0 -13  453.55   35.40
   5   0 -13   30.90    9.20
  -5   0  13    9.30    6.40
   5   0 -13   16.40    7.40
  -4   0  13  105.29   13.20
   4   0 -13  106.29   13.70
   4   0 -13  104.19   14.70
   3   0 -13  104.39   14.90
  -3   0  13   80.59   11.10
   3   0 -13   76.79   11.80
  -2   0  13   16.30    5.80
   2   0 -13   11.10    5.10
  -2   0  13    1.50    3.80
  -1   0  13   28.50    7.10
  -1   0  13   17.70    8.00
   1   0 -13   39.20    7.90
  -1   0  13   34.90    7.30
   0   0  13  190.28   17.90
   0   0  13  236.48   19.50
   0   0  13  219.48   23.00
   1   0  13    2.90    5.40
   1   0  13   -0.50    4.60
   1   0  13    1.60    4.10
   6  -1 -13   22.00    5.90
   6  -1 -13   16.50    6.80
  -6  -1  13   19.50    7.30
   6  -1 -13   18.20    7.50
  -6   1  13   21.30    6.70
   6   1 -13   26.80    8.00
   6   1 -13   14.10    7.80
   5  -1 -13  340.27   26.10
   5  -1 -13  304.37   23.30
  -5  -1  13  290.47   25.40
   5  -1 -13  352.76   25.20
  -5   1  13  274.37   23.40
   5   1 -13  277.17   25.80
   5   1 -13  272.87   24.50
   4  -1 -13   75.19   12.30
   4  -1 -13   66.39   10.60
  -4  -1  13   53.69    9.60
   4   1 -13   64.39   11.40
  -4   1  13   58.89   10.00
   4   1 -13   58.99   11.00
  -3  -1  13  587.34   39.00
   3  -1 -13  675.23   42.60
  -3  -1  13  585.04   40.30
   3  -1 -13  576.14   39.30
  -3   1  13  582.54   38.60
   3   1 -13  581.04   41.00
   2  -1 -13   72.79   12.00
   2  -1 -13  122.09   13.40
  -2  -1  13   82.79   11.90
  -2  -1  13   96.69   13.10
  -2   1  13   94.39   16.50
  -2   1  13   89.49   10.80
   2   1 -13   97.39   13.50
  -2   1  13   83.39   11.20
   1  -1 -13  118.29   13.80
  -1  -1  13  111.19   13.40
  -1  -1  13  121.59   14.90
  -1   1  13  127.99   13.60
  -1   1  13  127.39   19.20
   1   1 -13  113.49   14.60
  -1   1  13   96.89   11.90
   0  -1  13   12.80    5.50
   0  -1  13   29.50    7.40
   0  -1  13   25.10    8.40
   0   1  13   13.80    5.30
   0   1  13   15.20    8.80
   0   1  13   22.40    6.50
   1  -1  13   90.79   12.70
   1  -1  13   95.49   13.40
   1   1  13  105.09   17.90
   1   1  13  112.29   13.30
   1   1  13   86.89   11.10
   6  -2 -13   51.49    8.60
  -6  -2  13   57.19   12.00
   6   2 -13   74.39   12.20
   5  -2 -13   59.89    8.60
   5  -2 -13   91.69   13.90
   5  -2 -13   73.99   10.60
  -5  -2  13   73.19   13.40
  -5   2  13   65.99   10.60
   5   2 -13  101.19   15.10
   5   2 -13   68.59   11.90
  -4  -2  13   41.20    9.30
   4  -2 -13   59.89   10.80
   4  -2 -13   48.60    8.70
  -4   2  13   41.80    7.90
   4   2 -13   34.80    9.30
   3  -2 -13  121.49   13.80
   3  -2 -13  143.19   16.80
  -3  -2  13  116.09   14.60
  -3  -2  13  114.39   15.80
   3   2 -13   92.89   15.40
  -3   2  13  140.99   14.20
   2  -2 -13  358.96   26.20
  -2  -2  13  359.96   28.00
  -2  -2  13  379.96   29.10
   2  -2 -13  365.16   28.80
  -2   2  13  379.06   33.10
  -2   2  13  365.46   26.20
   2   2 -13  390.86   29.60
   1  -2 -13  104.19   12.30
  -1  -2  13   84.49   12.90
  -1  -2  13   98.49   13.70
   1  -2 -13   87.49   13.20
  -1   2  13   90.19   16.00
   1   2 -13   88.39   13.20
  -1   2  13   76.19   10.50
  -1   2  13  100.89   11.20
   0  -2  13  136.29   16.10
   0  -2  13  150.68   17.00
   0   2  13  125.19   19.40
   0   2  13  141.29   14.60
   0   2  13  144.19   13.60
   1  -2  13   44.40    9.60
   1  -2  13   37.50    9.10
   1   2  13   36.60    8.40
   1   2  13   45.70   13.00
   1   2  13   40.30    7.70
   5  -3 -13    5.20    4.70
  -5  -3  13   -3.70    3.00
   5  -3 -13    4.90    4.90
  -5   3  13    3.50    3.40
   5   3 -13    0.60    5.60
   4  -3 -13  131.99   14.30
   4  -3 -13  130.19   16.30
  -4  -3  13  104.19   16.00
  -4   3  13   99.79   12.40
   4   3 -13  124.89   17.90
  -3  -3  13   83.99   12.60
   3  -3 -13  107.09   12.80
   3  -3 -13   85.79   13.40
  -3  -3  13  103.09   16.10
  -3   3  13   96.89   12.00
   3   3 -13  127.09   18.10
   2  -3 -13  103.79   14.50
  -2  -3  13   98.99   14.60
   2  -3 -13   88.59   11.50
  -2  -3  13   70.29   12.00
  -2   3  13   95.09   16.90
  -2   3  13   72.89   10.70
   2   3 -13   76.49   14.60
   1  -3 -13   71.39   10.30
   1  -3 -13   82.29   12.80
  -1  -3  13   46.90   10.90
  -1  -3  13   81.99   12.90
  -1   3  13   79.29   15.30
  -1   3  13   65.09    9.40
  -1   3  13   69.29    9.50
   1   3 -13   77.99   14.30
   0  -3  13  359.16   29.50
   0  -3  13  383.96   29.80
   0   3  13  335.07   24.80
   0   3  13  412.56   35.50
   0   3  13  336.17   25.00
  -5  -4  13   84.89   14.90
  -5   4  13   58.19    9.00
   5   4 -13   40.80   12.20
  -4  -4  13   49.30   12.00
  -4  -4  13   62.29   11.60
   4  -4 -13   66.29   11.60
   4  -4 -13   61.99   10.00
   4   4 -13   41.50   11.30
  -4   4  13   59.79    9.50
   3  -4 -13   85.89   13.70
  -3  -4  13   46.10   10.70
   3  -4 -13   62.09    9.30
  -3  -4  13   76.99   14.60
  -3   4  13   35.30   13.00
   3   4 -13   84.79   16.40
  -3   4  13   63.79    9.60
   2  -4 -13   58.59   10.30
  -2  -4  13   62.79   12.00
   2  -4 -13   66.29   10.10
  -2  -4  13   44.20   10.50
   2   4 -13   53.49   13.20
  -2   4  13   74.59   16.90
  -2   4  13   53.19    9.30
   1  -4 -13   95.29   14.00
  -1  -4  13  103.29   16.40
  -1  -4  13   90.69   14.00
   1  -4 -13   80.69   10.60
  -1   4  13   82.99   11.10
  -1   4  13   80.59   17.00
   0  -4  13   78.29   14.00
   0   4  13   94.39   10.70
   0   4  13  105.69   21.60
   3  -5 -13  150.48   18.00
  -3  -5  13  125.99   17.70
   3  -5 -13  130.49   15.00
  -3   5  13  129.89   14.80
   3   5 -13  181.08   24.00
   2  -5 -13   -3.30    3.70
   2  -5 -13    2.20    4.30
  -2  -5  13   -3.30    4.90
  -2   5  13    0.00    4.80
   2   5 -13  -10.00    5.30
   5   0 -14   10.20    7.00
  -5   0  14    5.50    4.60
   4   0 -14  101.59   14.20
   4   0 -14   74.99   12.80
  -4   0  14   86.09   13.00
  -3   0  14    0.90    3.30
   3   0 -14    4.30    4.80
   3   0 -14    3.10    4.80
  -2   0  14    6.60    5.40
   2   0 -14    4.60    5.70
  -1   0  14  399.76   28.20
   1   0 -14  350.46   28.20
  -1   0  14  379.66   32.00
  -1   0  14  359.26   28.00
   0   0  14  120.89   14.90
   0   0  14  141.99   19.90
   5  -1 -14   85.69   15.20
  -5  -1  14   99.09   15.10
   5   1 -14  132.99   17.80
  -5   1  14  101.89   14.00
   5   1 -14   98.99   15.20
   4  -1 -14  103.49   13.10
  -4  -1  14  109.99   15.20
   4  -1 -14   95.19   14.00
   4   1 -14  121.19   16.80
  -4   1  14   79.69   12.40
   4   1 -14   78.09   13.10
   3  -1 -14  432.66   30.20
   3  -1 -14  404.56   31.40
  -3  -1  14  374.86   30.20
  -3   1  14  367.06   28.60
   3   1 -14  409.76   32.00
  -2  -1  14   49.80    9.40
   2  -1 -14   58.79   11.60
  -2  -1  14   33.40    9.20
   2  -1 -14   51.19    9.60
  -2   1  14   54.39    9.60
   2   1 -14   67.59   11.80
  -1  -1  14    6.30    5.50
   1  -1 -14   19.50    6.40
  -1  -1  14   28.70    7.90
  -1   1  14   15.60    5.90
  -1   1  14   25.90    6.90
  -1   1  14   24.00   10.90
  -4  -2  14   43.10   11.20
   4  -2 -14   43.60    9.00
  -4   2  14   42.80    8.60
   4   2 -14   28.60   10.40
   3  -2 -14  149.39   15.90
  -3  -2  14  143.89   18.00
   3  -2 -14  140.39   17.40
  -3   2  14  103.39   13.20
   3   2 -14  130.49   18.00
  -2  -2  14   87.39   13.80
   2  -2 -14   61.59   12.20
  -2  -2  14   63.09   11.60
   2  -2 -14   88.19   12.00
   2   2 -14   83.69   14.50
  -2   2  14   83.09   10.90
  -2   2  14   87.99   17.30
  -1  -2  14   74.79   12.30
   1  -2 -14  123.79   13.50
  -1   2  14   94.19   17.00
  -3  -3  14  163.18   19.30
  -3  -3  14  223.58   24.10
   3  -3 -14  202.68   23.70
   3  -3 -14  224.68   18.40
  -3   3  14  146.39   16.60
   3   3 -14  174.18   22.50
   2  -3 -14  177.08   19.90
   2  -3 -14  124.69   14.90
  -2  -3  14  182.18   19.30
   2   3 -14  173.68   21.70
  -2   3  14  172.08   24.20
  -2   3  14  143.99   15.60
   0   0   0    0.00    0.00

_computing_structure_solution     'SHELXT 2014/5 (Sheldrick, 2014)'
;
_shelx_hkl_checksum               94163
_shelx_SHELXL_version_number      '2016/5'
_olex2_submission_special_instructions 'No special instructions were received'
